# Supplementary material for: Genome-centered metagenomics illuminates adaptations of core members to a partial Nitritation–Anammox bioreactor under periodic microaeration
Source: Front Microbiol. 2023 Jan 26;14:1046769. doi: 10.3389/fmicb.2023.1046769 (PMC9909701; doi:10.3389/fmicb.2023.1046769)
Supplement: Supplementary file 4 [file Data_Sheet_2.XLSX]

## Sheet: AMX01
ORF	Classification	Subclassification	k number	ko definition	ko name	blastp subject	blastp evalue	blastp bitscore
DMEBDDEC_00185	Carbon	formate oxidation	K05299	formate dehydrogenase (NADP+) alpha subunit	fdhA	NUN23389.1 (2Fe-2S)-binding protein [Candidatus Jettenia caeni]	6.95e-253	697
DMEBDDEC_00255	Carbon	Glycolysis	K16370	6-phosphofructokinase 2	pfkB	KAA0251728.1 1-phosphofructokinase family hexose kinase [Candidatus Jettenia sp. AMX1]	5.15e-209	582
DMEBDDEC_00654	Carbon	Acetate fermentation	K00925	acetate kinase	ackA	KAA0245785.1 acetate/propionate family kinase [Candidatus Brocadia sp. AMX2]	0	1377
DMEBDDEC_00955	Carbon	Glycolysis	K25026	glucokinase?	glk	NUN22878.1 ROK family protein [Candidatus Jettenia caeni]	2.29e-216	602
DMEBDDEC_01032	Carbon	Acetate fermentation	K01512	acylphosphatase	acyP	TLD43063.1 Acylphosphate phosphohydrolase [Candidatus Jettenia ecosi]	9.82e-60	187
DMEBDDEC_01244	Carbon	Glycolysis	K00873	pyruvate kinase	pyk	KAA0251001.1 pyruvate kinase [Candidatus Jettenia sp. AMX1]	6.39999999917596e-315	863
DMEBDDEC_02228	Carbon	formate oxidation	K05299	formate dehydrogenase (NADP+) alpha subunit	fdhA	MBE7445098.1 formate dehydrogenase subunit alpha [Planctomycetia bacterium]	0	1623
DMEBDDEC_02325	Carbon	Carbon fixation	K14138	acetyl-CoA synthase	acsB	NUN24371.1 CO dehydrogenase/CO-methylating acetyl-CoA synthase complex subunit beta [Candidatus Jettenia caeni]	0	1474
DMEBDDEC_02326	Carbon	Carbon fixation	K00198	anaerobic carbon-monoxide dehydrogenase catalytic subunit	acsA	MBC6929749.1 anaerobic carbon-monoxide dehydrogenase catalytic subunit [Candidatus Jettenia sp.]	0	1311
DMEBDDEC_02380	Carbon	Glycolysis	K21071	ATP-dependent phosphofructokinase	pfk	KAA0248332.1 ATP-dependent 6-phosphofructokinase [Candidatus Jettenia sp. AMX1]	7.47e-250	690
DMEBDDEC_02625	Carbon	Gluconeogenesis	K03841	fructose-1,6-bisphosphatase I	fbp	KAA0251248.1 class 1 fructose-bisphosphatase [Candidatus Jettenia sp. AMX1]	7.44e-247	680
DMEBDDEC_02656	Carbon	propionate production	K22224	acetate---CoA ligase (ADP-forming) subunit beta	acdB	KAA0247139.1 acetyl-CoA synthetase [Candidatus Jettenia sp. AMX1]	4.87e-143	410
DMEBDDEC_02746	Carbon	Gluconeogenesis	K02446	fructose-1,6-bisphosphatase II	glpX	KAA0247302.1 fructose-bisphosphatase class II [Candidatus Jettenia sp. AMX1]	0	1696
DMEBDDEC_02955	Carbon	Gluconeogenesis	K01610	phosphoenolpyruvate carboxykinase (ATP)	pckA	NUN22978.1 phosphoenolpyruvate carboxykinase [Candidatus Jettenia caeni]	0	1086
DMEBDDEC_02976	Carbon	propionate production	K24012	acetate---CoA ligase (ADP-forming)	acdAB	TLD43166.1 Acetyl-CoA synthetase (ADP-forming) [Candidatus Jettenia ecosi]	0	1315
DMEBDDEC_02995	Carbon	acetate assimilation	K01895	acetyl-CoA synthetase	acs	KAA0248454.1 acetate--CoA ligase [Candidatus Jettenia sp. AMX1]	0	1186
DMEBDDEC_00531	Nitrogen	Nitrification	K10535	hydroxylamine dehydrogenase	hao	NUN23502.1 hydroxylamine oxidase [Candidatus Jettenia caeni]	0	1020
DMEBDDEC_00628	Nitrogen	Nitrification	K10535	hydroxylamine dehydrogenase	hao	TLD43661.1 hydroxylamine oxidoreductase [Candidatus Jettenia ecosi]	0	864
DMEBDDEC_00918	Nitrogen	Nitrification	K10535	hydroxylamine dehydrogenase	hao	KAA0249193.1 hypothetical protein EDM77_09855 [Candidatus Jettenia sp. AMX1]	0	1762
DMEBDDEC_00932	Nitrogen	Denitrification	K00368	nitrite reductase (NO-forming)	nirK	TLD42892.1 Copper-containing nitrite reductase [Candidatus Jettenia ecosi]	5.93e-40	144
DMEBDDEC_01095	Nitrogen	Nitrification	K10535	hydroxylamine dehydrogenase	hao	KAA0249689.1 hydroxylamine oxidoreductase [Candidatus Jettenia sp. AMX1]	0	1140
DMEBDDEC_01233	Nitrogen	Nitrification	K10535	hydroxylamine dehydrogenase	hao	TLD40575.1 Hydroxylamine oxidoreductase precursor [Candidatus Jettenia ecosi]	0	1115
DMEBDDEC_01270	Nitrogen	Nitrification	K10535	hydroxylamine dehydrogenase	hao	KAA0250019.1 hydroxylamine reductase [Candidatus Jettenia sp. AMX1]	2.08e-289	797
DMEBDDEC_01485	Nitrogen	Nitrification	K10535	hydroxylamine dehydrogenase	hao	KAA0248886.1 hydroxylamine oxidoreductase [Candidatus Jettenia sp. AMX1]	0	1234
DMEBDDEC_01600	Nitrogen	DNRA/denitrification/nitrification	K00371	nitrate reductase / nitrite oxidoreductase, beta subunit	narH/nxrB	TLD41306.1 Respiratory nitrate reductase beta chain [Candidatus Jettenia ecosi]	0	870
DMEBDDEC_02162	Nitrogen	anammox	K20935	hydrazine dehydrogenase	hdh	BAF36964.1 hydrazine-oxidizing enzyme [Candidatus Jettenia caeni]	0	1231
DMEBDDEC_02239	Nitrogen	DNRA	K03385	nitrite reductase (cytochrome c-552)	nrfA	KAA0251283.1 ammonia-forming cytochrome c nitrite reductase subunit c552 [Candidatus Jettenia sp. AMX1]	0	946
DMEBDDEC_02240	Nitrogen	DNRA	K15876	cytochrome c nitrite reductase small subunit	nrfH	KAA0251282.1 cytochrome c nitrite reductase small subunit [Candidatus Jettenia sp. AMX1]	1.59e-117	338
DMEBDDEC_02379	Nitrogen	DNRA	K00362	nitrite reductase (NADH) large subunit	nirB	KAA0248333.1 NAD(P)/FAD-dependent oxidoreductase [Candidatus Jettenia sp. AMX1]	6.09e-268	739
DMEBDDEC_02728	Nitrogen	Nitrification	K10535	hydroxylamine dehydrogenase	hao	KAA0246553.1 hydroxylamine oxidoreductase [Candidatus Jettenia sp. AMX1]	0	1172
DMEBDDEC_02731	Nitrogen	anammox	K20935	hydrazine dehydrogenase	hdh	GAB63744.1 hydrazine oxidoreductase HzoB [Candidatus Jettenia caeni]	0	1267
DMEBDDEC_02736	Nitrogen	Nitrification	K10535	hydroxylamine dehydrogenase	hao	KAA0247311.1 hypothetical protein EDM77_15490 [Candidatus Jettenia sp. AMX1]	1.48e-305	834
DMEBDDEC_02927	Nitrogen	Nitrification	K10535	hydroxylamine dehydrogenase	hao	KAA0250432.1 hydroxylamine oxidoreductase [Candidatus Jettenia sp. AMX1]	0	1077
DMEBDDEC_03024	Nitrogen	Assimilatory nitrate reduction	K00367	ferredoxin-nitrate reductase	narB	NUN24461.1 molybdopterin-dependent oxidoreductase [Candidatus Jettenia caeni]	0	1366
DMEBDDEC_00181	Oxygen	ROS defense	K03386	peroxiredoxin 2/4	PRDX2_4, ahpC	TLD42849.1 Alkyl hydroperoxide reductase subunit C-like protein [Candidatus Jettenia ecosi]	5.87e-123	353
DMEBDDEC_00982	Oxygen	ROS defense	K04564	superoxide dismutase, Fe-Mn family	SOD2	KAA0250535.1 twin-arginine translocation signal domain-containing protein [Candidatus Jettenia sp. AMX1]	7.55e-172	483
DMEBDDEC_01592	Oxygen	Terminal oxidase	K00425	cytochrome bd ubiquinol oxidase subunit I	cydA	KAA0248124.1 hypothetical protein EDM77_13405 [Candidatus Jettenia sp. AMX1]	0	1377
DMEBDDEC_01738	Oxygen	ROS defense	K11065	thioredoxin-dependent peroxiredoxin	tpx	KAA0249331.1 thiol peroxidase [Candidatus Jettenia sp. AMX1]	1.21e-197	551
DMEBDDEC_01861	Oxygen	ROS defense	K00384	thioredoxin reductase (NADPH)	trxB, TRR	KAA0251497.1 thioredoxin-disulfide reductase [Candidatus Jettenia sp. AMX1]	1.92e-228	633
DMEBDDEC_01907	Oxygen	ROS defense	K11065	thioredoxin-dependent peroxiredoxin	tpx	KAA0247479.1 thiol peroxidase [Candidatus Jettenia sp. AMX1]	3.76e-118	341
DMEBDDEC_02077	Oxygen	ROS defense	K03671	thioredoxin 1	trxA	KAA0250360.1 thioredoxin [Candidatus Jettenia sp. AMX1]	1.85e-71	218
DMEBDDEC_02366	Oxygen	ROS defense	K04564	superoxide dismutase, Fe-Mn family	SOD2	GAB61300.1 superoxide dismutase [Candidatus Jettenia caeni]	1.16e-157	446
DMEBDDEC_02374	Oxygen	ROS defense	K00428	cytochrome c peroxidase		TLD41973.1 Cytochrome c551 peroxidase [Candidatus Jettenia ecosi]	3.85e-241	670
DMEBDDEC_02384	Oxygen	ROS defense	K05919	superoxide reductase	dfx	NUN23254.1 hypothetical protein [Candidatus Jettenia caeni]	2.22e-80	241
Extracellular carbohydrate-Active Enzyme
ORF	CAZy classes	evalue	bitscore	Activities
DMEBDDEC_01974	CBM6			Modules of approx. 120 residues. The cellulose-binding function has been demonstrated in one case on amorphous cellulose and β-1,4-xylan. Some of these modules also bind β-1,3-glucan, β-1,3-1,4-glucan, and β-1,4-glucan.
DMEBDDEC_02442	CBM9			Modules of approx. 170 residues found so far only in xylanases. The cellulose-binding function has been demonstrated in one case.
Extracellular peptidase
ORF	MEROPS Classification	evalue	bitscore	Catalytic type	MEROPS Name
DMEBDDEC_01845	M10.A09			Metallo	Zmp-5
DMEBDDEC_01974	U69.UPW			unknown catalytic type	family U69 unassigned peptidases
DMEBDDEC_02127	M36.UPW			Metallo	family M36 unassigned peptidases
DMEBDDEC_02745	S08.UPA			Serine	subfamily S8A unassigned peptidases
Transporter
ORF	TCID	evalue	bitscore	gene.product	Subfamily	Family	Fam_abbreviation	Superfamily	substrate
DMEBDDEC_00030	3.A.3.7.2	3.5e-212	601	gnl|TC-DB|Q1M605|3.A.3.7.2 Potassium-transporting ATPase A chain OS=Rhizobium leguminosarum bv. viciae (strain 3841) GN=kdpA PE=3 SV=1	3.A.3.7	3.A.3	P-ATPase	P-type ATPase (P-ATPase) Superfamily	CHEBI:26216;potassium atom
DMEBDDEC_00031	3.A.3.7.1	0	889	gnl|TC-DB|P03960|3.A.3.7.1 Potassium-transporting ATPase B chain (EC 3.6.3.12) (Potassium- translocating ATPase B chain) (ATP phosphohydrolase [potassium- transporting] B chain) (Potassium binding and translocating subunit B) - Escherichia coli.	3.A.3.7	3.A.3	P-ATPase	P-type ATPase (P-ATPase) Superfamily	CHEBI:8345;potassium(1+)
DMEBDDEC_00044	3.A.1.120.8	2.28e-220	621	gnl|TC-DB|P9WQK3|3.A.1.120.8 Energy-dependent translational throttle protein EttA OS=Mycobacterium tuberculosis (strain ATCC 25618 / H37Rv) OX=83332 GN=ettA PE=1 SV=1	3.A.1.120	3.A.1	ABC	ABC1, ABC2, ABC3 Superfamilies	NA
DMEBDDEC_00047	1.A.33.1.4	3.62e-135	406	gnl|TC-DB|G4NXA5|1.A.33.1.4 Chaperone protein DnaK OS=Bacillus subtilis subsp. spizizenii TU-B-10 GN=dnaK PE=3 SV=1	NA	NA	NA	NA	NA
DMEBDDEC_00054	3.D.1.9.2	2.5e-178	532	gnl|TC-DB|P07658|3.D.1.9.2 Formate dehydrogenase H OS=Escherichia coli (strain K12) GN=fdhF PE=1 SV=2	3.D.1.9	3.D.1	NDH	Iron-Sulfur Protein (ISP) Superfamily	CHEBI:5584;hydron
DMEBDDEC_00165	3.A.2.1.6	3.27e-233	649	gnl|TC-DB|F8L1Z3|3.A.2.1.6 ATP synthase subunit alpha OS=Parachlamydia acanthamoebae (strain UV7) GN=atpA-B PE=3 SV=1	NA	NA	NA	NA	CHEBI:9175;sodium(1+)|CHEBI:5584;hydron
DMEBDDEC_00167	3.A.2.1.14	4.29e-240	664	gnl|TC-DB|P07677|3.A.2.1.14 ATP synthase subunit beta OS=Bacillus sp. (strain PS3) OX=2334 GN=atpD PE=1 SV=1	NA	NA	NA	NA	CHEBI:5584;hydron
DMEBDDEC_00186	3.D.1.9.2	4.86e-144	431	gnl|TC-DB|P07658|3.D.1.9.2 Formate dehydrogenase H OS=Escherichia coli (strain K12) GN=fdhF PE=1 SV=2	3.D.1.9	3.D.1	NDH	Iron-Sulfur Protein (ISP) Superfamily	CHEBI:5584;hydron
DMEBDDEC_00226	3.A.11.1.5	1.98e-109	346	gnl|TC-DB|AKM80781.1|3.A.11.1.5 hypothetical protein UW38_C0001G0951 [Candidatus Saccharibacteria bacterium GW2011_GWC2_44_17]	NA	NA	NA	NA	NA
DMEBDDEC_00242	2.A.6.2.39	3.44e-307	879	gnl|TC-DB|Q9I0V6|2.A.6.2.39 Probable Resistance-Nodulation-Cell Division (RND) efflux transporter OS=Pseudomonas aeruginosa GN=PA2527 PE=4 SV=1	2.A.6.2	2.A.6	RND	Resistance-Nodulation-Cell Division (RND) Superfamily	CHEBI:2960;aztreonam|CHEBI:7644;novobiocin|CHEBI:9474;tetracycline|CHEBI:25106;macrolide
DMEBDDEC_00246	3.A.2.1.9	1.51e-233	647	gnl|TC-DB|BAK19931|3.A.2.1.9 ApNa+ATPase beta subunit [Aphanothece halophytica]	NA	NA	NA	NA	CHEBI:49766;sodium(1+)
DMEBDDEC_00253	3.A.2.1.12	4.96e-213	601	gnl|TC-DB|Q467F6|3.A.2.1.12 H(+)-transporting ATP synthase, subunit alpha OS=Methanosarcina barkeri (strain Fusaro / DSM 804) OX=269797 GN=Mbar_A3099 PE=3 SV=1	NA	NA	NA	NA	CHEBI:9175;sodium(1+)
DMEBDDEC_00266	3.A.3.2.21	1.91e-187	561	gnl|TC-DB|A9BJX0|3.A.3.2.21 Calcium-translocating P-type ATPase, PMCA-type OS=Petrotoga mobilis (strain DSM 10674 / SJ95) GN=Pmob_0991 PE=3 SV=1	3.A.3.2	3.A.3	P-ATPase	P-type ATPase (P-ATPase) Superfamily	CHEBI:3308;calcium(2+)
DMEBDDEC_00271	3.A.15.2.1	5.32e-133	384	gnl|TC-DB|Q51532|3.A.15.2.1 PILU (Twitching motility protein PILU) - Pseudomonas aeruginosa.	NA	NA	NA	NA	NA
DMEBDDEC_00272	3.A.15.2.1	1.65e-137	394	gnl|TC-DB|P24559|3.A.15.2.1 Twitching mobility protein - Pseudomonas aeruginosa.	NA	NA	NA	NA	NA
DMEBDDEC_00282	3.A.9.1.2	1.19e-249	721	gnl|TC-DB|Q9FI56|3.A.9.1.2 Chaperone protein ClpC1, chloroplastic OS=Arabidopsis thaliana GN=CLPC1 PE=1 SV=1	3.A.9.1	3.A.9	CEPT or Tic-Toc	ATP-dependent Clp Protease (Clp) Superfamily	CHEBI:8526;protein polypeptide chain
DMEBDDEC_00364	3.A.5.1.3	1.27e-106	323	gnl|TC-DB|Q6MJ32|3.A.5.1.3 Protein translocase subunit SecY OS=Bdellovibrio bacteriovorus (strain ATCC 15356 / DSM 50701 / NCIB 9529 / HD100) GN=secY PE=3 SV=1	3.A.5.1	3.A.5	Sec	Ankyrin Repeat Domain-containing (Ank) Superfamily	CHEBI:8526;protein polypeptide chain
DMEBDDEC_00391	2.A.123.2.13	1.17e-101	317	gnl|TC-DB|I3IJ02|2.A.123.2.13 Uncharacterized protein OS=Candidatus Jettenia caeni GN=KSU1_C0101 PE=4 SV=1	2.A.123.2	2.A.123	Sweet	Transporter-Opsin-G protein-coupled receptor (TOG) Superfamily	CHEBI:9840;UDP-sugar
DMEBDDEC_00450	1.C.107.1.4	2.98e-129	445	gnl|TC-DB|Q93EP6|1.C.107.1.4 TcdB1 OS=Photorhabdus luminescens GN=tcdB1 PE=4 SV=1	NA	NA	NA	NA	CHEBI:27026;toxin
DMEBDDEC_00477	2.A.123.2.13	8.81e-101	324	gnl|TC-DB|I3IJ02|2.A.123.2.13 Uncharacterized protein OS=Candidatus Jettenia caeni GN=KSU1_C0101 PE=4 SV=1	2.A.123.2	2.A.123	Sweet	Transporter-Opsin-G protein-coupled receptor (TOG) Superfamily	CHEBI:9840;UDP-sugar
DMEBDDEC_00512	2.A.6.1.8	8.11e-306	876	gnl|TC-DB|Q1DDM4|2.A.6.1.8 Cation efflux system protein CusA OS=Myxococcus xanthus (strain DK 1622) GN=MXAN_0988 PE=4 SV=1	2.A.6.1	2.A.6	RND	Resistance-Nodulation-Cell Division (RND) Superfamily	CHEBI:23380;copper(2+)
DMEBDDEC_00528	2.A.114.1.8	1.01e-184	539	gnl|TC-DB|L0DJM9|2.A.114.1.8 Carbon starvation protein, predicted membrane protein OS=Singulisphaera acidiphila (strain ATCC BAA-1392 / DSM 18658 / VKM B-2454 / MOB10) GN=Sinac_4879 PE=4 SV=1	2.A.114.1	2.A.114	CstA	APC Superfamily	NA
DMEBDDEC_00530	3.A.3.2.21	1.01e-262	764	gnl|TC-DB|A9BJX0|3.A.3.2.21 Calcium-translocating P-type ATPase, PMCA-type OS=Petrotoga mobilis (strain DSM 10674 / SJ95) GN=Pmob_0991 PE=3 SV=1	3.A.3.2	3.A.3	P-ATPase	P-type ATPase (P-ATPase) Superfamily	CHEBI:3308;calcium(2+)
DMEBDDEC_00581	3.A.12.1.1	2.1e-146	448	gnl|TC-DB|P21458|3.A.12.1.1 Stage III sporulation protein E - Bacillus subtilis.	NA	NA	NA	NA	CHEBI:4291;deoxyribonucleic acid
DMEBDDEC_00603	9.A.8.1.8	2.62e-112	353	gnl|TC-DB|O29993|9.A.8.1.8 Iron (II) transporter (FeoB-1) OS=Archaeoglobus fulgidus GN=AF_0246 PE=4 SV=1	NA	NA	NA	NA	CHEBI:34754;iron(2+)
DMEBDDEC_00611	3.A.29.1.4	2.93e-183	531	gnl|TC-DB|O67077|3.A.29.1.4 ATP-dependent zinc metalloprotease FtsH OS=Aquifex aeolicus (strain VF5) OX=224324 GN=ftsH PE=1 SV=1	3.A.29.1	3.A.29	MIMP	AAA-ATPase Superfamily	NA
DMEBDDEC_00636	3.A.15.4.1	6.31e-158	462	gnl|TC-DB|Q8F3M7|3.A.15.4.1 Type II secretory pathway ATPase protein E OS=Leptospira interrogans serogroup Icterohaemorrhagiae serovar Lai (strain 56601) GN=gspE PE=4 SV=1	NA	NA	NA	NA	CHEBI:8526;protein polypeptide chain
DMEBDDEC_00637	3.A.15.4.1	5.74e-148	437	gnl|TC-DB|Q8F3M7|3.A.15.4.1 Type II secretory pathway ATPase protein E OS=Leptospira interrogans serogroup Icterohaemorrhagiae serovar Lai (strain 56601) GN=gspE PE=4 SV=1	NA	NA	NA	NA	CHEBI:8526;protein polypeptide chain
DMEBDDEC_00665	3.A.1.105.16	0	993	gnl|TC-DB|C8TJS4|3.A.1.105.16 Fused ribosome-associated ATPase RbbA: ATP-binding protein/ATP-binding protein/predicted membrane protein OS=Escherichia coli O26:H11 (strain 11368 / EHEC) GN=rbbA PE=3 SV=1	3.A.1.105	3.A.1	ABC	ABC1, ABC2, ABC3 Superfamilies	NA
DMEBDDEC_00666	3.A.1.105.16	2.86e-122	357	gnl|TC-DB|P0AGH1|3.A.1.105.16 Inner membrane transport permease YhhJ OS=Escherichia coli (strain K12) GN=yhhJ PE=1 SV=3	3.A.1.105	3.A.1	ABC	ABC1, ABC2, ABC3 Superfamilies	NA
DMEBDDEC_00724	1.A.33.1.4	1.08e-237	669	gnl|TC-DB|G4NXA5|1.A.33.1.4 Chaperone protein DnaK OS=Bacillus subtilis subsp. spizizenii TU-B-10 GN=dnaK PE=3 SV=1	NA	NA	NA	NA	NA
DMEBDDEC_00744	1.A.11.2.7	2.73e-119	357	gnl|TC-DB|O28528|1.A.11.2.7 Ammonium transporter (Amt-2) OS=Archaeoglobus fulgidus GN=AF_1746 PE=4 SV=1	NA	NA	NA	NA	CHEBI:7435;ammonium|CHEBI:35264;tetramethylammonium
DMEBDDEC_00831	3.A.29.1.5	4.45e-189	548	gnl|TC-DB|P0AAI3|3.A.29.1.5 ATP-dependent zinc metalloprotease FtsH OS=Escherichia coli (strain K12) OX=83333 GN=ftsH PE=1 SV=1	3.A.29.1	3.A.29	MIMP	AAA-ATPase Superfamily	NA
DMEBDDEC_00844	3.D.1.5.1	3.23e-203	578	gnl|TC-DB|Q74GA3|3.D.1.5.1 NADH dehydrogenase I, F subunit - Geobacter sulfurreducens.	3.D.1.5	3.D.1	NDH	Iron-Sulfur Protein (ISP) Superfamily	CHEBI:5584;hydron
DMEBDDEC_00863	9.B.34.1.5	9.58e-111	367	gnl|TC-DB|J7ZT93|9.B.34.1.5 Diguanylate cyclase (GGDEF) domain-containing protein OS=Bacillus cereus HuA2-4 GN=IG7_01488 PE=4 SV=1	9.B.34.1	9.B.34	KPSH	BART Superfamily	NA
DMEBDDEC_00890	3.A.15.4.1	1.27e-109	333	gnl|TC-DB|Q8F3M7|3.A.15.4.1 Type II secretory pathway ATPase protein E OS=Leptospira interrogans serogroup Icterohaemorrhagiae serovar Lai (strain 56601) GN=gspE PE=4 SV=1	NA	NA	NA	NA	CHEBI:8526;protein polypeptide chain
DMEBDDEC_00891	3.A.15.4.1	1.02e-120	366	gnl|TC-DB|Q8F3M7|3.A.15.4.1 Type II secretory pathway ATPase protein E OS=Leptospira interrogans serogroup Icterohaemorrhagiae serovar Lai (strain 56601) GN=gspE PE=4 SV=1	NA	NA	NA	NA	CHEBI:8526;protein polypeptide chain
DMEBDDEC_00925	3.A.3.32.6	1.12e-170	504	gnl|TC-DB|A5UJX0|3.A.3.32.6 Cation transport ATPase, HAD family OS=Methanobrevibacter smithii (strain PS / ATCC 35061 / DSM 861) GN=Msm_0293 PE=4 SV=1	3.A.3.32	3.A.3	P-ATPase	P-type ATPase (P-ATPase) Superfamily	CHEBI:25213;metal cation
DMEBDDEC_01084	1.B.17.2.4	7.18e-124	370	gnl|TC-DB|Q1D6U5|1.B.17.2.4 Outer membrane efflux protein OS=Myxococcus xanthus (strain DK 1622) GN=MXAN_3431 PE=4 SV=1	1.B.17.2	1.B.17	OMF	Outer Membrane Pore-forming Protein I (OMPP-I) Superfamily	CHEBI:25367;molecule
DMEBDDEC_01171	2.A.25.1.9	5.12e-126	373	gnl|TC-DB|W0WFC6|2.A.25.1.9 Sodium/alanine symporter AgcS OS=Pseudomonas aeruginosa MH38 GN=agcS PE=4 SV=1	2.A.25.1	2.A.25	AGCS	APC Superfamily	CHEBI:5460;glycine|CHEBI:2539;alanine|CHEBI:22653;asparagine|CHEBI:5432;glutamine
DMEBDDEC_01175	3.A.1.106.2	5.91e-102	321	gnl|TC-DB|Q2G2M9|3.A.1.106.2 Putative multidrug export ATP-binding/permease protein SAOUHSC_02003 - Staphylococcus aureus (strain NCTC 8325).	3.A.1.106	3.A.1	ABC	ABC1, ABC2, ABC3 Superfamilies	CHEBI:9502;tetraphenylphosphonium|CHEBI:9948;verapamil|CHEBI:5742;2'-(4-ethoxyphenyl)-5-(4-methylpiperazin-1-yl)-2,5'-bibenzimidazole|CHEBI:9983;vincaleukoblastine|CHEBI:2496;doxorubicin|CHEBI:42478;ethidium
DMEBDDEC_01259	9.B.241.1.2	2.53e-138	405	gnl|TC-DB|WP_035967890.1|9.B.241.1.2 hypothetical protein [Caballeronia grimmiae]	NA	NA	NA	NA	NA
DMEBDDEC_01338	3.D.1.9.2	5.05e-120	364	gnl|TC-DB|P16431|3.D.1.9.2 Formate hydrogenlyase subunit 5 OS=Escherichia coli (strain K12) GN=hycE PE=1 SV=1	3.D.1.9	3.D.1	NDH	Iron-Sulfur Protein (ISP) Superfamily	CHEBI:5584;hydron
DMEBDDEC_01339	3.D.1.9.1	8.8e-120	360	gnl|TC-DB|P77437|3.D.1.9.1 Hydrogenase-4 component F OS=Escherichia coli (strain K12) GN=hyfF PE=3 SV=1	3.D.1.9	3.D.1	NDH	Iron-Sulfur Protein (ISP) Superfamily	CHEBI:8345;potassium(1+)|CHEBI:5584;hydron
DMEBDDEC_01342	3.D.1.9.1	4.23e-111	349	gnl|TC-DB|P23482|3.D.1.9.1 Hydrogenase-4 component B OS=Escherichia coli (strain K12) GN=hyfB PE=1 SV=2	3.D.1.9	3.D.1	NDH	Iron-Sulfur Protein (ISP) Superfamily	CHEBI:8345;potassium(1+)|CHEBI:5584;hydron
DMEBDDEC_01349	3.A.23.6.1	6.44e-130	373	gnl|TC-DB|B3ET62|3.A.23.6.1 Glyceraldehyde-3-phosphate dehydrogenase OS=Amoebophilus asiaticus (strain 5a2) GN=Aasi_1069 PE=3 SV=1	3.A.23.6	3.A.23	T6SS	ATP-dependent Clp Protease (Clp) Superfamily	NA
DMEBDDEC_01431	3.D.6.1.2	5.25e-104	316	gnl|TC-DB|C4N8U0|3.D.6.1.2 RnfC OS=Acetobacterium woodii GN=rnfC PE=4 SV=1	3.D.6.1	3.D.6	NFO/NRF	Iron-Sulfur Protein (ISP) Superfamily	CHEBI:5584;hydron
DMEBDDEC_01501	3.A.3.2.29	1.32e-240	719	gnl|TC-DB|D5C355|3.A.3.2.29 ATPase, P-type (Transporting), HAD superfamily, subfamily IC OS=Nitrosococcus halophilus (strain Nc4) GN=Nhal_1826 PE=3 SV=1	3.A.3.2	3.A.3	P-ATPase	P-type ATPase (P-ATPase) Superfamily	CHEBI:3308;calcium(2+)
DMEBDDEC_01502	3.A.1.1.16	1.6e-109	323	gnl|TC-DB|Q8TZQ3|3.A.1.1.16 Putative sugar transport ATP-hydrolyzing - Pyrococcus furiosus.	3.A.1.1	3.A.1	ABC	ABC1, ABC2, ABC3 Superfamilies	CHEBI:17593;maltooligosaccharide
DMEBDDEC_01544	3.A.1.7.5	1.03e-103	301	gnl|TC-DB|O51236|3.A.1.7.5 Phosphate import ATP-binding protein PstB OS=Borrelia burgdorferi (strain ATCC 35210 / B31 / CIP 102532 / DSM 4680) GN=pstB PE=3 SV=1	3.A.1.7	3.A.1	ABC	ABC1, ABC2, ABC3 Superfamilies	CHEBI:7793;phosphate(3-)
DMEBDDEC_01548	3.A.3.6.8	3.75e-170	504	gnl|TC-DB|Q60048|3.A.3.6.8 Probable cadmium-transporting ATPase - Listeria monocytogenes.	3.A.3.6	3.A.3	P-ATPase	P-type ATPase (P-ATPase) Superfamily	CHEBI:3290;cadmium(2+)
DMEBDDEC_01628	3.A.11.1.5	6.6e-158	471	gnl|TC-DB|AKM80112|3.A.11.1.5 putative ATP-dependent DNA helicase [Candidatus Saccharibacteria bacterium GW2011_GWC2_44_17]	NA	NA	NA	NA	NA
DMEBDDEC_01649	2.A.6.2.16	3.24e-236	698	gnl|TC-DB|Q9I0Y8|2.A.6.2.16 Resistance-Nodulation-Cell Division - Pseudomonas aeruginosa.	2.A.6.2	2.A.6	RND	Resistance-Nodulation-Cell Division (RND) Superfamily	CHEBI:3603;chloramphenicol|CHEBI:15368;acrolein|CHEBI:87211;fluoroquinolone antibiotic
DMEBDDEC_01703	3.A.5.1.1	4.86e-142	413	gnl|TC-DB|P0AGD7|3.A.5.1.1 Signal recognition particle protein - Escherichia coli.	3.A.5.1	3.A.5	Sec	Ankyrin Repeat Domain-containing (Ank) Superfamily	CHEBI:8526;protein polypeptide chain
DMEBDDEC_01711	3.A.16.1.5	5.01e-201	587	gnl|TC-DB|P54609|3.A.16.1.5 Cell division control protein 48 homolog A OS=Arabidopsis thaliana OX=3702 GN=CDC48A PE=1 SV=1	3.A.16.1	3.A.16	ER-RT	AAA-ATPase Superfamily	CHEBI:14911;protein
DMEBDDEC_01790	3.A.10.1.10	3.41e-283	797	gnl|TC-DB|A6L2M4|3.A.10.1.10 Putative K(+)-stimulated pyrophosphate-energized sodium pump OS=Bacteroides vulgatus (strain ATCC 8482 / DSM 1447 / NCTC 11154) GN=hppA PE=3 SV=1	NA	NA	NA	NA	CHEBI:9175;sodium(1+)|CHEBI:5584;hydron
DMEBDDEC_01795	3.A.3.1.8	2.73e-161	482	gnl|TC-DB|Q2FLJ9|3.A.3.1.8 ATPase, E1-E2 type OS=Methanospirillum hungatei (strain JF-1 / DSM 864) GN=Mhun_0636 PE=4 SV=1	3.A.3.1	3.A.3	P-ATPase	P-type ATPase (P-ATPase) Superfamily	CHEBI:9175;sodium(1+)|CHEBI:8345;potassium(1+)
DMEBDDEC_01822	8.A.7.1.1	7.4e-132	400	gnl|TC-DB|P08839|8.A.7.1.1 PHOSPHOENOLPYRUVATE-PROTEIN PHOSPHOTRANSFERASE (EC 2.7.3.9) (PHOSPHOTRANSFERASE SYSTEM, ENZYME I) - Escherichia coli.	NA	NA	NA	NA	NA
DMEBDDEC_01834	9.B.157.1.4	4.22e-130	375	gnl|TC-DB|Q8F2L2|9.B.157.1.4 Actin-like ATPase involved in cell morphogenesis OS=Leptospira interrogans serogroup Icterohaemorrhagiae serovar Lai (strain 56601) OX=189518 GN=mreB PE=4 SV=1	NA	NA	NA	NA	NA
DMEBDDEC_01857	1.A.35.3.2	8.98e-136	390	gnl|TC-DB|Q9WZ31|1.A.35.3.2 Magnesium transport protein CorA OS=Thermotoga maritima (strain ATCC 43589 / MSB8 / DSM 3109 / JCM 10099) GN=corA PE=1 SV=1	NA	NA	NA	NA	CHEBI:6635;magnesium(2+)|CHEBI:23337;cobalt(2+)
DMEBDDEC_01903	3.A.1.120.6	1.01e-200	575	gnl|TC-DB|P43672|3.A.1.120.6 ABC transporter ATP-binding protein uup OS=Escherichia coli (strain K12) GN=uup PE=1 SV=2	3.A.1.120	3.A.1	ABC	ABC1, ABC2, ABC3 Superfamilies	NA
DMEBDDEC_01936	2.A.6.1.2	0	1307	gnl|TC-DB|P13511|2.A.6.1.2 COBALT-ZINC-CADMIUM RESISTANCE PROTEIN CZCA (CATION EFFLUX SYSTEM PROTEIN CZCA) - Alcaligenes eutrophus (Ralstonia eutropha).	2.A.6.1	2.A.6	RND	Resistance-Nodulation-Cell Division (RND) Superfamily	CHEBI:3290;cadmium(2+)|CHEBI:23337;cobalt(2+)|CHEBI:10113;zinc(2+)
DMEBDDEC_01938	2.A.6.1.2	9.25e-105	322	gnl|TC-DB|P13510|2.A.6.1.2 Cobalt-zinc-cadmium resistance protein CzcB OS=Ralstonia metallidurans (strain CH34 / ATCC 43123 / DSM 2839) GN=czcB PE=1 SV=2	2.A.6.1	2.A.6	RND	Resistance-Nodulation-Cell Division (RND) Superfamily	CHEBI:3290;cadmium(2+)|CHEBI:23337;cobalt(2+)|CHEBI:10113;zinc(2+)
DMEBDDEC_01939	2.A.123.2.13	0	1021	gnl|TC-DB|I3IJ02|2.A.123.2.13 Uncharacterized protein OS=Candidatus Jettenia caeni GN=KSU1_C0101 PE=4 SV=1	2.A.123.2	2.A.123	Sweet	Transporter-Opsin-G protein-coupled receptor (TOG) Superfamily	CHEBI:9840;UDP-sugar
DMEBDDEC_01942	2.A.6.1.10	1.09e-305	875	gnl|TC-DB|Q1D665|2.A.6.1.10 Heavy metal efflux pump, CzcA family OS=Myxococcus xanthus (strain DK 1622) GN=MXAN_3671 PE=4 SV=1	2.A.6.1	2.A.6	RND	Resistance-Nodulation-Cell Division (RND) Superfamily	CHEBI:23380;copper(2+)
DMEBDDEC_01964	3.A.1.135.10	1.52e-123	379	gnl|TC-DB|A4XGX1|3.A.1.135.10 ABC transporter related protein OS=Caldicellulosiruptor saccharolyticus (strain ATCC 43494 / DSM 8903 / Tp8T 6331) OX=351627 GN=Csac_0522 PE=4 SV=1	3.A.1.135	3.A.1	ABC	ABC1, ABC2, ABC3 Superfamilies	NA
DMEBDDEC_01966	2.A.6.2.39	0	914	gnl|TC-DB|Q9I0V6|2.A.6.2.39 Probable Resistance-Nodulation-Cell Division (RND) efflux transporter OS=Pseudomonas aeruginosa GN=PA2527 PE=4 SV=1	2.A.6.2	2.A.6	RND	Resistance-Nodulation-Cell Division (RND) Superfamily	CHEBI:2960;aztreonam|CHEBI:7644;novobiocin|CHEBI:9474;tetracycline|CHEBI:25106;macrolide
DMEBDDEC_01968	3.A.1.106.2	2.93e-138	413	gnl|TC-DB|Q2G2M9|3.A.1.106.2 Putative multidrug export ATP-binding/permease protein SAOUHSC_02003 - Staphylococcus aureus (strain NCTC 8325).	3.A.1.106	3.A.1	ABC	ABC1, ABC2, ABC3 Superfamilies	CHEBI:9502;tetraphenylphosphonium|CHEBI:9948;verapamil|CHEBI:5742;2'-(4-ethoxyphenyl)-5-(4-methylpiperazin-1-yl)-2,5'-bibenzimidazole|CHEBI:9983;vincaleukoblastine|CHEBI:2496;doxorubicin|CHEBI:42478;ethidium
DMEBDDEC_02081	1.A.11.4.7	5.07e-112	339	gnl|TC-DB|F1TE58|1.A.11.4.7 Ammonium transporter OS=[Clostridium] papyrosolvens DSM 2782 GN=Cpap_1880 PE=4 SV=1	NA	NA	NA	NA	CHEBI:7435;ammonium|CHEBI:7434;ammonia|CHEBI:3283;carbon dioxide
DMEBDDEC_02150	3.A.1.7.1	1.05e-104	303	gnl|TC-DB|P0AAH0|3.A.1.7.1 Phosphate import ATP-binding protein pstB - Escherichia coli.	3.A.1.7	3.A.1	ABC	ABC1, ABC2, ABC3 Superfamilies	CHEBI:7793;phosphate(3-)
DMEBDDEC_02159	8.A.163.1.1	1.7e-129	397	gnl|TC-DB|P08238|8.A.163.1.1 Heat shock protein HSP 90-beta OS=Homo sapiens OX=9606 GN=HSP90AB1 PE=1 SV=4	NA	NA	NA	NA	CHEBI:14911;protein
DMEBDDEC_02202	2.A.1.25.3	1.47e-113	338	gnl|TC-DB|Q5F6G0|2.A.1.25.3 Putative signal transducer protein - Neisseria gonorrhoeae (strain ATCC 700825 / FA 1090).	2.A.1.25	2.A.1	MFS	Major Facilitator (MFS) Superfamily	CHEBI:8005;peptidoglycan
DMEBDDEC_02203	2.A.3.3.22	2.97e-141	414	gnl|TC-DB|Q8R706|2.A.3.3.22 Amino acid transporters OS=Caldanaerobacter subterraneus subsp. tengcongensis (strain DSM 15242 / JCM 11007 / NBRC 100824 / MB4) GN=PotE6 PE=4 SV=1	2.A.3.3	2.A.3	APC	APC Superfamily	CHEBI:2642;alpha-amino acid
DMEBDDEC_02228	3.D.1.9.2	8.38e-155	471	gnl|TC-DB|P07658|3.D.1.9.2 Formate dehydrogenase H OS=Escherichia coli (strain K12) GN=fdhF PE=1 SV=2	3.D.1.9	3.D.1	NDH	Iron-Sulfur Protein (ISP) Superfamily	CHEBI:5584;hydron
DMEBDDEC_02242	3.A.7.4.1	3.58e-159	446	gnl|TC-DB|Q56469|3.A.7.4.1 TRBB - Escherichia coli, and Enterobacter aerogenes (Aerobacter aerogenes).	NA	NA	NA	NA	CHEBI:8526;protein polypeptide chain
DMEBDDEC_02264	2.A.6.2.47	3.09e-114	338	gnl|TC-DB|C5IZH0|2.A.6.2.47 Acriflavin resistance protein AcrA OS=Klebsiella pneumoniae GN=oqxA PE=4 SV=1	2.A.6.2	2.A.6	RND	Resistance-Nodulation-Cell Division (RND) Superfamily	CHEBI:23888;drug
DMEBDDEC_02265	2.A.6.2.14	0	1393	gnl|TC-DB|B2FLY4|2.A.6.2.14 Putative drug resistance membrane fusion protein OS=Stenotrophomonas maltophilia (strain K279a) GN=smeW PE=4 SV=1	2.A.6.2	2.A.6	RND	Resistance-Nodulation-Cell Division (RND) Superfamily	CHEBI:3603;chloramphenicol|CHEBI:9474;tetracycline|CHEBI:22479;amino cyclitol glycoside|CHEBI:35190;diterpene
DMEBDDEC_02308	3.A.7.4.1	9.31e-146	424	gnl|TC-DB|P71184|3.A.7.4.1 TrbI - Enterobacter aerogenes (Aerobacter aerogenes).	NA	NA	NA	NA	CHEBI:8526;protein polypeptide chain
DMEBDDEC_02310	3.A.7.4.1	4.06e-141	399	gnl|TC-DB|P71182|3.A.7.4.1 TrbG - Enterobacter aerogenes (Aerobacter aerogenes).	NA	NA	NA	NA	CHEBI:8526;protein polypeptide chain
DMEBDDEC_02311	3.A.7.4.1	4.99e-101	294	gnl|TC-DB|P71181|3.A.7.4.1 TrbF - Enterobacter aerogenes (Aerobacter aerogenes).	NA	NA	NA	NA	CHEBI:8526;protein polypeptide chain
DMEBDDEC_02312	3.A.7.4.1	0	1199	gnl|TC-DB|P71180|3.A.7.4.1 TrbE - Enterobacter aerogenes (Aerobacter aerogenes).	NA	NA	NA	NA	CHEBI:8526;protein polypeptide chain
DMEBDDEC_02543	3.A.3.5.7	9.2e-178	528	gnl|TC-DB|O29777|3.A.3.5.7 Cation-transporting ATPase, P-type (PACS) - Archaeoglobus fulgidus.	3.A.3.5	3.A.3	P-ATPase	P-type ATPase (P-ATPase) Superfamily	CHEBI:49551;copper(1+)|CHEBI:49468;silver(1+)
DMEBDDEC_02563	2.A.123.2.13	4.91e-110	358	gnl|TC-DB|I3IJ02|2.A.123.2.13 Uncharacterized protein OS=Candidatus Jettenia caeni GN=KSU1_C0101 PE=4 SV=1	2.A.123.2	2.A.123	Sweet	Transporter-Opsin-G protein-coupled receptor (TOG) Superfamily	CHEBI:9840;UDP-sugar
DMEBDDEC_02611	1.A.11.1.4	6.6e-127	374	gnl|TC-DB|O67997|1.A.11.1.4 AmtB OS=Azospirillum brasilense GN=amtB PE=4 SV=1	NA	NA	NA	NA	CHEBI:7434;ammonia
DMEBDDEC_02613	1.A.11.2.7	9.26e-134	393	gnl|TC-DB|O28528|1.A.11.2.7 Ammonium transporter (Amt-2) OS=Archaeoglobus fulgidus GN=AF_1746 PE=4 SV=1	NA	NA	NA	NA	CHEBI:7435;ammonium|CHEBI:35264;tetramethylammonium
DMEBDDEC_02615	1.A.11.2.7	8.99e-132	390	gnl|TC-DB|O28528|1.A.11.2.7 Ammonium transporter (Amt-2) OS=Archaeoglobus fulgidus GN=AF_1746 PE=4 SV=1	NA	NA	NA	NA	CHEBI:7435;ammonium|CHEBI:35264;tetramethylammonium
DMEBDDEC_02672	3.A.1.106.2	6.35e-140	417	gnl|TC-DB|Q2G2M9|3.A.1.106.2 Putative multidrug export ATP-binding/permease protein SAOUHSC_02003 - Staphylococcus aureus (strain NCTC 8325).	3.A.1.106	3.A.1	ABC	ABC1, ABC2, ABC3 Superfamilies	CHEBI:9502;tetraphenylphosphonium|CHEBI:9948;verapamil|CHEBI:5742;2'-(4-ethoxyphenyl)-5-(4-methylpiperazin-1-yl)-2,5'-bibenzimidazole|CHEBI:9983;vincaleukoblastine|CHEBI:2496;doxorubicin|CHEBI:42478;ethidium
DMEBDDEC_02702	3.A.15.4.1	1.73e-150	442	gnl|TC-DB|Q8F3M7|3.A.15.4.1 Type II secretory pathway ATPase protein E OS=Leptospira interrogans serogroup Icterohaemorrhagiae serovar Lai (strain 56601) GN=gspE PE=4 SV=1	NA	NA	NA	NA	CHEBI:8526;protein polypeptide chain
DMEBDDEC_02764	9.B.126.2.6	5.18e-105	309	gnl|TC-DB|B8HSD7|9.B.126.2.6 Ribonuclease BN OS=Cyanothece sp. (strain PCC 7425 / ATCC 29141) GN=Cyan7425_1876 PE=4 SV=1	NA	NA	NA	NA	NA
DMEBDDEC_02810	3.A.9.1.2	8.53999999999999e-310	873	gnl|TC-DB|Q9FI56|3.A.9.1.2 Chaperone protein ClpC1, chloroplastic OS=Arabidopsis thaliana GN=CLPC1 PE=1 SV=1	3.A.9.1	3.A.9	CEPT or Tic-Toc	ATP-dependent Clp Protease (Clp) Superfamily	CHEBI:8526;protein polypeptide chain
DMEBDDEC_02839	9.B.111.1.5	5.75e-114	356	gnl|TC-DB|WP_121250785|9.B.111.1.5 lysine--tRNA ligase [Solirubrobacter pauli]	9.B.111.1	9.B.111	LysS	Major Facilitator (MFS) Superfamily	NA
DMEBDDEC_02845	3.A.29.1.5	1.3e-184	536	gnl|TC-DB|P0AAI3|3.A.29.1.5 ATP-dependent zinc metalloprotease FtsH OS=Escherichia coli (strain K12) OX=83333 GN=ftsH PE=1 SV=1	3.A.29.1	3.A.29	MIMP	AAA-ATPase Superfamily	NA
DMEBDDEC_02880	3.D.7.1.5	1.02e-109	324	gnl|TC-DB|OLS30727|3.D.7.1.5 Hydrogenase expression/formation protein HypD [Candidatus Thorarchaeota archaeon AB_25]	3.D.7.1	3.D.7	HHO	Iron-Sulfur Protein (ISP) Superfamily	NA
DMEBDDEC_02974	3.A.29.1.5	1.13e-184	535	gnl|TC-DB|P0AAI3|3.A.29.1.5 ATP-dependent zinc metalloprotease FtsH OS=Escherichia coli (strain K12) OX=83333 GN=ftsH PE=1 SV=1	3.A.29.1	3.A.29	MIMP	AAA-ATPase Superfamily	NA
DMEBDDEC_03024	3.D.1.9.2	9.29e-101	324	gnl|TC-DB|P07658|3.D.1.9.2 Formate dehydrogenase H OS=Escherichia coli (strain K12) GN=fdhF PE=1 SV=2	3.D.1.9	3.D.1	NDH	Iron-Sulfur Protein (ISP) Superfamily	CHEBI:5584;hydron
DMEBDDEC_03070	3.A.1.211.25	2.17e-104	330	gnl|TC-DB|ANC59923.1|3.A.1.211.25 OptrA [Enterococcus faecalis]	3.A.1.211	3.A.1	ABC	ABC1, ABC2, ABC3 Superfamilies	NA
DMEBDDEC_03072	3.A.1.106.17	1.36e-121	370	gnl|TC-DB|C1F8I9|3.A.1.106.17 Efflux ABC transporter, permease/ATP-binding protein OS=Acidobacterium capsulatum (strain ATCC 51196 / DSM 11244 / JCM 7670 / NBRC 15755 / NCIMB 13165 / 161) OX=240015 GN=ACP_0113 PE=4 SV=1	3.A.1.106	3.A.1	ABC	ABC1, ABC2, ABC3 Superfamilies	NA
DMEBDDEC_03073	3.A.1.106.18	1.03e-138	416	gnl|TC-DB|Q72J05|3.A.1.106.18 Multidrug resistance ABC transporter ATP-binding and permease protein OS=Thermus thermophilus (strain HB27 / ATCC BAA-163 / DSM 7039) OX=262724 GN=TT_C0976 PE=1 SV=1	3.A.1.106	3.A.1	ABC	ABC1, ABC2, ABC3 Superfamilies	CHEBI:5742;2'-(4-ethoxyphenyl)-5-(4-methylpiperazin-1-yl)-2,5'-bibenzimidazole
DMEBDDEC_03092	3.D.10.1.9	9.28e-163	476	gnl|TC-DB|I7FYK4|3.D.10.1.9 Succinate dehydrogenase flavoprotein subunit OS=Mycolicibacterium smegmatis (strain ATCC 700084 / mc(2)155) OX=246196 GN=sdhA PE=3 SV=1	3.D.10.1	3.D.10	SDH	Iron-Sulfur Protein (ISP) Superfamily	CHEBI:24636;proton|CHEBI:30031;succinate(2-)|CHEBI:29806;fumarate(2-)|CHEBI:10545;electron
DMEBDDEC_03146	9.A.47.2.1	2.48e-135	396	gnl|TC-DB|Q7UHP7|9.A.47.2.1 Putative secretory protein OS=Rhodopirellula baltica (strain SH1) GN=RB13073 PE=4 SV=1	NA	NA	NA	NA	CHEBI:8526;protein polypeptide chain
DMEBDDEC_03149	1.B.3.1.11	1.66e-266	723	gnl|TC-DB|I3IPM6|1.B.3.1.11 Uncharacterized protein OS=planctomycete KSU-1 GN=KSU1_D0362 PE=4 SV=1	1.B.3.1	1.B.3	SP	Outer Membrane Pore-forming Protein I (OMPP-I) Superfamily	CHEBI:25367;molecule

## Sheet: AMX02
ORF	Classification	Subclassification	k number	ko definition	ko name	blastp subject	blastp evalue	blastp bitscore
HHEHPEGL_02382	Carbon	acetate assimilation	K01895	acetyl-CoA synthetase	acs	MBW7899708.1 acetate--CoA ligase [Candidatus Brocadia sapporoensis]	0	1203
HHEHPEGL_00213	Carbon	Acetate fermentation	K01512	acylphosphatase	acyP	OQZ04003.1 acylphosphatase [Candidatus Brocadia sp. UTAMX1]	2.21e-61	191
HHEHPEGL_01748	Nitrogen	anammox	K20935	hydrazine dehydrogenase	hdh	TWU50245.1 Hydroxylamine oxidoreductase precursor [Candidatus Brocadiaceae bacterium B188]	0	1236
HHEHPEGL_00325	Carbon	Carbon fixation	K14138	acetyl-CoA synthase	acsB	MBW7898734.1 CO dehydrogenase/CO-methylating acetyl-CoA synthase complex subunit beta [Candidatus Brocadia sapporoensis]	0	1482
HHEHPEGL_00326	Carbon	Carbon fixation	K00198	anaerobic carbon-monoxide dehydrogenase catalytic subunit	acsA	OQZ04293.1 carbon-monoxide dehydrogenase catalytic subunit [Candidatus Brocadia sp. UTAMX1]	0	1320
HHEHPEGL_00872	Nitrogen	DNRA	K00362	nitrite reductase (NADH) large subunit	nirB	OQZ02546.1 hypothetical protein B6D34_10775 [Candidatus Brocadia sp. UTAMX1]	3.66e-287	788
HHEHPEGL_02183	Nitrogen	DNRA	K15876	cytochrome c nitrite reductase small subunit	nrfH	OQZ04089.1 cytochrome c nitrite reductase small subunit [Candidatus Brocadia sp. UTAMX1]	8.2e-119	341
HHEHPEGL_02184	Nitrogen	DNRA	K03385	nitrite reductase (cytochrome c-552)	nrfA	OQZ04090.1 nitrite reductase [Candidatus Brocadia sp. UTAMX1]	0	988
HHEHPEGL_00845	Nitrogen	DNRA/denitrification/nitrification	K00371	nitrate reductase / nitrite oxidoreductase, beta subunit	narH/nxrB	QQR67268.1 4Fe-4S dicluster domain-containing protein [Candidatus Brocadia sp.]	0	873
HHEHPEGL_00848	Nitrogen	DNRA/denitrification/nitrification	K00370	nitrate reductase / nitrite oxidoreductase, alpha subunit	narG/nxrA	OQZ02570.1 nitrate oxidoreductase subunit alpha [Candidatus Brocadia sp. UTAMX1]	0	2411
HHEHPEGL_01810	Nitrogen	DNRA/denitrification/nitrification	K00370	nitrate reductase / nitrite oxidoreductase, alpha subunit	narG/nxrA	OQZ01218.1 hypothetical protein B6D34_14070 [Candidatus Brocadia sp. UTAMX1]	0	1907
HHEHPEGL_01811	Nitrogen	DNRA/denitrification/nitrification	K00371	nitrate reductase / nitrite oxidoreductase, beta subunit	narH/nxrB	MBW7899669.1 4Fe-4S binding protein [Candidatus Brocadia sapporoensis]	1.95e-270	740
HHEHPEGL_02500	Nitrogen	DNRA/denitrification/nitrification	K00370	nitrate reductase / nitrite oxidoreductase, alpha subunit	narG/nxrA	OQZ04816.1 nitrate oxidoreductase subunit alpha [Candidatus Brocadia sp. UTAMX1]	0	2347
HHEHPEGL_00402	Carbon	formate oxidation	K15022	formate dehydrogenase (NADP+) beta subunit	fdhB	OQZ03008.1 hypothetical protein B6D34_09130 [Candidatus Brocadia sp. UTAMX1]	0	1184
HHEHPEGL_00682	Carbon	formate oxidation	K05299	formate dehydrogenase (NADP+) alpha subunit	fdhA	TWU49946.1 putative formate dehydrogenase [Candidatus Brocadiaceae bacterium B188]	2.75e-259	713
HHEHPEGL_00793	Carbon	formate oxidation	K15022	formate dehydrogenase (NADP+) beta subunit	fdhB	OQZ03378.1 hypothetical protein B6D34_07755 [Candidatus Brocadia sp. UTAMX1]	0	1123
HHEHPEGL_02063	Carbon	formate oxidation	K05299	formate dehydrogenase (NADP+) alpha subunit	fdhA	OQZ04171.1 hypothetical protein B6D34_04145 [Candidatus Brocadia sp. UTAMX1]	0	1788
HHEHPEGL_02596	Carbon	formate oxidation	K05299	formate dehydrogenase (NADP+) alpha subunit	fdhA	OQZ02047.1 formate dehydrogenase subunit alpha [Candidatus Brocadia sp. UTAMX1]	0	1815
HHEHPEGL_01311	Carbon	Gluconeogenesis	K01610	phosphoenolpyruvate carboxykinase (ATP)	pckA	MBW7898289.1 phosphoenolpyruvate carboxykinase (GTP) [Candidatus Brocadia sapporoensis]	0	1124
HHEHPEGL_01816	Carbon	Gluconeogenesis	K03841	fructose-1,6-bisphosphatase I	fbp	MBW7897677.1 class 1 fructose-bisphosphatase [Candidatus Brocadia sapporoensis]	3e-180	508
HHEHPEGL_00172	Carbon	Glycolysis	K00873	pyruvate kinase	pyk	OQZ04044.1 pyruvate kinase [Candidatus Brocadia sp. UTAMX1]	0	922
HHEHPEGL_00338	Carbon	Glycolysis	K25026	glucokinase?	glk	OQZ04304.1 hypothetical protein B6D34_03755 [Candidatus Brocadia sp. UTAMX1]	1.3e-227	630
HHEHPEGL_00873	Carbon	Glycolysis	K21071	ATP-dependent phosphofructokinase	pfk	OQZ02545.1 6-phosphofructokinase [Candidatus Brocadia sp. UTAMX1]	7.02e-259	712
HHEHPEGL_00108	Nitrogen	Nitrification	K10535	hydroxylamine dehydrogenase	hao	OQZ04691.1 hydroxylamine oxidoreductase [Candidatus Brocadia sp. UTAMX1]	0	1175
HHEHPEGL_00406	Nitrogen	Nitrification	K10535	hydroxylamine dehydrogenase	hao	OQZ03004.1 hydroxylamine oxidoreductase [Candidatus Brocadia sp. UTAMX1]	0	1242
HHEHPEGL_00999	Nitrogen	Nitrification	K10535	hydroxylamine dehydrogenase	hao	OQZ04415.1 hypothetical protein B6D34_03460 [Candidatus Brocadia sp. UTAMX1]	0	1147
HHEHPEGL_01440	Nitrogen	Nitrification	K10535	hydroxylamine dehydrogenase	hao	OQZ02756.1 hydroxylamine oxidoreductase [Candidatus Brocadia sp. UTAMX1]	0	1147
HHEHPEGL_01742	Nitrogen	Nitrification	K10535	hydroxylamine dehydrogenase	hao	OQZ03823.1 hypothetical protein B6D34_06450 [Candidatus Brocadia sp. UTAMX1]	0	865
HHEHPEGL_01751	Nitrogen	Nitrification	K10535	hydroxylamine dehydrogenase	hao	MBW7899822.1 hydroxylamine oxidoreductase [Candidatus Brocadia sapporoensis]	0	1156
HHEHPEGL_02091	Nitrogen	Nitrification	K10535	hydroxylamine dehydrogenase	hao	OQZ05101.1 hydroxylamine oxidoreductase [Candidatus Brocadia sp. UTAMX1]	0	1144
HHEHPEGL_02152	Nitrogen	Nitrification	K10535	hydroxylamine dehydrogenase	hao	OQZ03779.1 hydroxylamine oxidoreductase [Candidatus Brocadia sp. UTAMX1]	0	1041
HHEHPEGL_02266	Nitrogen	Nitrification	K10535	hydroxylamine dehydrogenase	hao	OQZ01413.1 hydroxylamine oxidoreductase [Candidatus Brocadia sp. UTAMX1]	0	1031
HHEHPEGL_01461	Carbon	propionate production	K22224	acetate---CoA ligase (ADP-forming) subunit beta	acdB	TWU52657.1 succinyl-CoA synthetase subunit beta [Candidatus Brocadiaceae bacterium B188]	5.49e-175	491
HHEHPEGL_00164	Oxygen	ROS defense	K03671	thioredoxin 1	trxA	MBW7898627.1 thioredoxin [Candidatus Brocadia sapporoensis]	6.45e-72	219
HHEHPEGL_00278	Oxygen	ROS defense	K00428	cytochrome c peroxidase		OQZ04534.1 hypothetical protein B6D34_03060 [Candidatus Brocadia sp. UTAMX1]	0	954
HHEHPEGL_00870	Oxygen	ROS defense	K00428	cytochrome c peroxidase		TWU53562.1 Cytochrome c551 peroxidase precursor [Candidatus Brocadiaceae bacterium B188]	2.87e-262	720
HHEHPEGL_00877	Oxygen	ROS defense	K05919	superoxide reductase	dfx	MBW7897950.1 hypothetical protein [Candidatus Brocadia sapporoensis]	2.13e-83	249
HHEHPEGL_01644	Oxygen	ROS defense	K03386	peroxiredoxin 2/4	PRDX2_4, ahpC	WP_070067339.1 peroxiredoxin [Candidatus Brocadia sapporoensis]	7.93e-124	355
HHEHPEGL_01784	Oxygen	ROS defense	K04564	superoxide dismutase, Fe-Mn family	SOD2	TWU53072.1 Superoxide dismutase [Fe] [Candidatus Brocadiaceae bacterium B188]	8.88e-169	474
HHEHPEGL_02035	Oxygen	ROS defense	K00384	thioredoxin reductase (NADPH)	trxB, TRR	OQZ01502.1 thioredoxin-disulfide reductase [Candidatus Brocadia sp. UTAMX1]	3.06e-224	621
HHEHPEGL_02062	Oxygen	ROS defense	K05919	superoxide reductase	dfx	OQZ04170.1 hypothetical protein B6D34_04140 [Candidatus Brocadia sp. UTAMX1]	1.3e-64	199
HHEHPEGL_02208	Oxygen	Terminal oxidase	K00425	cytochrome bd ubiquinol oxidase subunit I	cydA	OQZ04388.1 hypothetical protein B6D34_03320 [Candidatus Brocadia sp. UTAMX1]	0	1171
Extracellular peptidase
ORF	MEROPS Classification	evalue	bitscore	Catalytic type	MEROPS Name
HHEHPEGL_00909	M06.UPW			Metallo	family M6 unassigned peptidases
HHEHPEGL_01817	S08.UPA			Serine	subfamily S8A unassigned peptidases
HHEHPEGL_02441	U69.UPW			unknown catalytic type	family U69 unassigned peptidases
HHEHPEGL_02448	S08.UPA			Serine	subfamily S8A unassigned peptidases
Transporter
ORF	TCID	evalue	bitscore	gene.product	Subfamily	Family	Fam_abbreviation	Superfamily	substrate
HHEHPEGL_00004	2.A.6.1.17	3.53e-239	704	gnl|TC-DB|Q1LCE8|2.A.6.1.17 Heavy metal cation tricomponent efflux efflux pump ZniA (CzcA-like) OS=Ralstonia metallidurans (strain CH34 / ATCC 43123 / DSM 2839) GN=zniA PE=4 SV=1	2.A.6.1	2.A.6	RND	Resistance-Nodulation-Cell Division (RND) Superfamily	CHEBI:10113;zinc(2+)
HHEHPEGL_00021	3.A.29.1.5	5.48e-182	529	gnl|TC-DB|P0AAI3|3.A.29.1.5 ATP-dependent zinc metalloprotease FtsH OS=Escherichia coli (strain K12) OX=83333 GN=ftsH PE=1 SV=1	3.A.29.1	3.A.29	MIMP	AAA-ATPase Superfamily	NA
HHEHPEGL_00036	8.A.7.1.1	5.09e-134	405	gnl|TC-DB|P08839|8.A.7.1.1 PHOSPHOENOLPYRUVATE-PROTEIN PHOSPHOTRANSFERASE (EC 2.7.3.9) (PHOSPHOTRANSFERASE SYSTEM, ENZYME I) - Escherichia coli.	NA	NA	NA	NA	NA
HHEHPEGL_00064	2.A.6.3.6	1.8e-103	347	gnl|TC-DB|Q8CX78|2.A.6.3.6 Acriflavine resistance protein (Cation efflux system) OS=Oceanobacillus iheyensis (strain DSM 14371 / JCM 11309 / KCTC 3954 / HTE831) GN=OB2940 PE=4 SV=1	2.A.6.3	2.A.6	RND	Resistance-Nodulation-Cell Division (RND) Superfamily	NA
HHEHPEGL_00094	3.A.9.1.2	4.52e-307	866	gnl|TC-DB|Q9FI56|3.A.9.1.2 Chaperone protein ClpC1, chloroplastic OS=Arabidopsis thaliana GN=CLPC1 PE=1 SV=1	3.A.9.1	3.A.9	CEPT or Tic-Toc	ATP-dependent Clp Protease (Clp) Superfamily	CHEBI:8526;protein polypeptide chain
HHEHPEGL_00168	1.A.11.4.7	1.18e-111	334	gnl|TC-DB|F1TE58|1.A.11.4.7 Ammonium transporter OS=[Clostridium] papyrosolvens DSM 2782 GN=Cpap_1880 PE=4 SV=1	NA	NA	NA	NA	CHEBI:7435;ammonium|CHEBI:7434;ammonia|CHEBI:3283;carbon dioxide
HHEHPEGL_00246	2.A.38.1.1	2.01e-101	312	gnl|TC-DB|P0AFZ7|2.A.38.1.1 Trk system potassium uptake protein trkH - Escherichia coli.	2.A.38.1	2.A.38	Trk	VIC Superfamily	CHEBI:8345;potassium(1+)
HHEHPEGL_00261	2.A.123.2.13	0	927	gnl|TC-DB|I3IJ02|2.A.123.2.13 Uncharacterized protein OS=Candidatus Jettenia caeni GN=KSU1_C0101 PE=4 SV=1	2.A.123.2	2.A.123	Sweet	Transporter-Opsin-G protein-coupled receptor (TOG) Superfamily	CHEBI:9840;UDP-sugar
HHEHPEGL_00264	2.A.123.2.13	8.79e-114	368	gnl|TC-DB|I3IJ02|2.A.123.2.13 Uncharacterized protein OS=Candidatus Jettenia caeni GN=KSU1_C0101 PE=4 SV=1	2.A.123.2	2.A.123	Sweet	Transporter-Opsin-G protein-coupled receptor (TOG) Superfamily	CHEBI:9840;UDP-sugar
HHEHPEGL_00332	3.A.5.1.1	2.8e-282	804	gnl|TC-DB|P10408|3.A.5.1.1 PREPROTEIN TRANSLOCASE SECA SUBUNIT - Escherichia coli.	3.A.5.1	3.A.5	Sec	Ankyrin Repeat Domain-containing (Ank) Superfamily	CHEBI:8526;protein polypeptide chain
HHEHPEGL_00342	3.A.1.106.18	2.87e-150	445	gnl|TC-DB|Q72J05|3.A.1.106.18 Multidrug resistance ABC transporter ATP-binding and permease protein OS=Thermus thermophilus (strain HB27 / ATCC BAA-163 / DSM 7039) OX=262724 GN=TT_C0976 PE=1 SV=1	3.A.1.106	3.A.1	ABC	ABC1, ABC2, ABC3 Superfamilies	CHEBI:5742;2'-(4-ethoxyphenyl)-5-(4-methylpiperazin-1-yl)-2,5'-bibenzimidazole
HHEHPEGL_00428	3.A.29.1.5	5.45e-192	555	gnl|TC-DB|P0AAI3|3.A.29.1.5 ATP-dependent zinc metalloprotease FtsH OS=Escherichia coli (strain K12) OX=83333 GN=ftsH PE=1 SV=1	3.A.29.1	3.A.29	MIMP	AAA-ATPase Superfamily	NA
HHEHPEGL_00450	3.A.1.17.9	3.52e-120	371	gnl|TC-DB|R7QS55|3.A.1.17.9 Stackhouse genomic scaffold, scaffold_628 OS=Chondrus crispus GN=CHC_T00000780001 PE=3 SV=1	3.A.1.17	3.A.1	ABC	ABC1, ABC2, ABC3 Superfamilies	NA
HHEHPEGL_00512	3.A.1.106.2	1.59e-134	404	gnl|TC-DB|Q2G2M9|3.A.1.106.2 Putative multidrug export ATP-binding/permease protein SAOUHSC_02003 - Staphylococcus aureus (strain NCTC 8325).	3.A.1.106	3.A.1	ABC	ABC1, ABC2, ABC3 Superfamilies	CHEBI:9502;tetraphenylphosphonium|CHEBI:9948;verapamil|CHEBI:5742;2'-(4-ethoxyphenyl)-5-(4-methylpiperazin-1-yl)-2,5'-bibenzimidazole|CHEBI:9983;vincaleukoblastine|CHEBI:2496;doxorubicin|CHEBI:42478;ethidium
HHEHPEGL_00517	3.A.1.17.9	1.7e-139	421	gnl|TC-DB|R7QS55|3.A.1.17.9 Stackhouse genomic scaffold, scaffold_628 OS=Chondrus crispus GN=CHC_T00000780001 PE=3 SV=1	3.A.1.17	3.A.1	ABC	ABC1, ABC2, ABC3 Superfamilies	NA
HHEHPEGL_00568	9.B.34.1.5	4.83e-103	335	gnl|TC-DB|J7ZT93|9.B.34.1.5 Diguanylate cyclase (GGDEF) domain-containing protein OS=Bacillus cereus HuA2-4 GN=IG7_01488 PE=4 SV=1	9.B.34.1	9.B.34	KPSH	BART Superfamily	NA
HHEHPEGL_00681	3.D.1.9.2	3.59e-143	428	gnl|TC-DB|P07658|3.D.1.9.2 Formate dehydrogenase H OS=Escherichia coli (strain K12) GN=fdhF PE=1 SV=2	3.D.1.9	3.D.1	NDH	Iron-Sulfur Protein (ISP) Superfamily	CHEBI:5584;hydron
HHEHPEGL_00710	3.A.5.2.2	4.43e-142	416	gnl|TC-DB|P66844|3.A.5.2.2 Signal recognition particle protein OS=Mycobacterium tuberculosis GN=ffh PE=3 SV=1	3.A.5.2	3.A.5	Sec	Ankyrin Repeat Domain-containing (Ank) Superfamily	CHEBI:8526;protein polypeptide chain
HHEHPEGL_00715	9.B.34.1.5	1.21e-113	369	gnl|TC-DB|J7ZT93|9.B.34.1.5 Diguanylate cyclase (GGDEF) domain-containing protein OS=Bacillus cereus HuA2-4 GN=IG7_01488 PE=4 SV=1	9.B.34.1	9.B.34	KPSH	BART Superfamily	NA
HHEHPEGL_00722	3.A.1.106.2	3.47e-121	372	gnl|TC-DB|Q2G2M9|3.A.1.106.2 Putative multidrug export ATP-binding/permease protein SAOUHSC_02003 - Staphylococcus aureus (strain NCTC 8325).	3.A.1.106	3.A.1	ABC	ABC1, ABC2, ABC3 Superfamilies	CHEBI:9502;tetraphenylphosphonium|CHEBI:9948;verapamil|CHEBI:5742;2'-(4-ethoxyphenyl)-5-(4-methylpiperazin-1-yl)-2,5'-bibenzimidazole|CHEBI:9983;vincaleukoblastine|CHEBI:2496;doxorubicin|CHEBI:42478;ethidium
HHEHPEGL_00745	1.A.104.1.2	6.24e-180	529	gnl|TC-DB|NCD33588.1|1.A.104.1.2 flagellar biosynthesis protein FlhA [Spartobacteria bacterium]	NA	NA	NA	NA	NA
HHEHPEGL_00756	3.A.6.3.1	2.99e-151	436	gnl|TC-DB|O84676|3.A.6.3.1 Yops secretion ATPase - Chlamydia trachomatis.	NA	NA	NA	NA	CHEBI:8526;protein polypeptide chain
HHEHPEGL_00812	2.A.114.1.8	6.36e-184	536	gnl|TC-DB|L0DJM9|2.A.114.1.8 Carbon starvation protein, predicted membrane protein OS=Singulisphaera acidiphila (strain ATCC BAA-1392 / DSM 18658 / VKM B-2454 / MOB10) GN=Sinac_4879 PE=4 SV=1	2.A.114.1	2.A.114	CstA	APC Superfamily	NA
HHEHPEGL_00826	3.A.3.4.4	0	921	gnl|TC-DB|C1DHA2|3.A.3.4.4 Cation-translocating P-type ATPase with extended N-terminal transmembrane region OS=Azotobacter vinelandii (strain DJ / ATCC BAA-1303) GN=Avin_02480 PE=3 SV=1	3.A.3.4	3.A.3	P-ATPase	P-type ATPase (P-ATPase) Superfamily	CHEBI:6635;magnesium(2+)
HHEHPEGL_00907	3.A.29.1.4	2.11e-185	536	gnl|TC-DB|O67077|3.A.29.1.4 ATP-dependent zinc metalloprotease FtsH OS=Aquifex aeolicus (strain VF5) OX=224324 GN=ftsH PE=1 SV=1	3.A.29.1	3.A.29	MIMP	AAA-ATPase Superfamily	NA
HHEHPEGL_00918	9.A.8.1.8	3.95e-116	363	gnl|TC-DB|O29993|9.A.8.1.8 Iron (II) transporter (FeoB-1) OS=Archaeoglobus fulgidus GN=AF_0246 PE=4 SV=1	NA	NA	NA	NA	CHEBI:34754;iron(2+)
HHEHPEGL_00937	3.A.12.1.1	7.31e-149	454	gnl|TC-DB|P21458|3.A.12.1.1 Stage III sporulation protein E - Bacillus subtilis.	NA	NA	NA	NA	CHEBI:4291;deoxyribonucleic acid
HHEHPEGL_00940	1.A.11.2.7	2.37e-119	356	gnl|TC-DB|O28528|1.A.11.2.7 Ammonium transporter (Amt-2) OS=Archaeoglobus fulgidus GN=AF_1746 PE=4 SV=1	NA	NA	NA	NA	CHEBI:7435;ammonium|CHEBI:35264;tetramethylammonium
HHEHPEGL_00950	3.D.6.1.2	8.28e-107	323	gnl|TC-DB|C4N8U0|3.D.6.1.2 RnfC OS=Acetobacterium woodii GN=rnfC PE=4 SV=1	3.D.6.1	3.D.6	NFO/NRF	Iron-Sulfur Protein (ISP) Superfamily	CHEBI:5584;hydron
HHEHPEGL_01051	3.A.5.1.4	1.8e-106	322	gnl|TC-DB|Q9X1I9|3.A.5.1.4 Protein translocase subunit SecY OS=Thermotoga maritima (strain ATCC 43589 / MSB8 / DSM 3109 / JCM 10099) OX=243274 GN=secY PE=1 SV=1	3.A.5.1	3.A.5	Sec	Ankyrin Repeat Domain-containing (Ank) Superfamily	CHEBI:14911;protein
HHEHPEGL_01128	3.A.1.106.2	4.19e-110	342	gnl|TC-DB|Q2G2M9|3.A.1.106.2 Putative multidrug export ATP-binding/permease protein SAOUHSC_02003 - Staphylococcus aureus (strain NCTC 8325).	3.A.1.106	3.A.1	ABC	ABC1, ABC2, ABC3 Superfamilies	CHEBI:9502;tetraphenylphosphonium|CHEBI:9948;verapamil|CHEBI:5742;2'-(4-ethoxyphenyl)-5-(4-methylpiperazin-1-yl)-2,5'-bibenzimidazole|CHEBI:9983;vincaleukoblastine|CHEBI:2496;doxorubicin|CHEBI:42478;ethidium
HHEHPEGL_01165	2.A.3.3.22	4.03e-139	409	gnl|TC-DB|Q8R706|2.A.3.3.22 Amino acid transporters OS=Caldanaerobacter subterraneus subsp. tengcongensis (strain DSM 15242 / JCM 11007 / NBRC 100824 / MB4) GN=PotE6 PE=4 SV=1	2.A.3.3	2.A.3	APC	APC Superfamily	CHEBI:2642;alpha-amino acid
HHEHPEGL_01174	3.A.1.103.5	4.67e-125	369	gnl|TC-DB|P72884|3.A.1.103.5 ABC transporter OS=Synechocystis sp. (strain PCC 6803 / Kazusa) GN=rfbB PE=4 SV=1	3.A.1.103	3.A.1	ABC	ABC1, ABC2, ABC3 Superfamilies	CHEBI:4879;ethanol|CHEBI:23008;carbohydrate
HHEHPEGL_01214	2.A.6.1.8	2.08e-307	882	gnl|TC-DB|Q1DDM4|2.A.6.1.8 Cation efflux system protein CusA OS=Myxococcus xanthus (strain DK 1622) GN=MXAN_0988 PE=4 SV=1	2.A.6.1	2.A.6	RND	Resistance-Nodulation-Cell Division (RND) Superfamily	CHEBI:23380;copper(2+)
HHEHPEGL_01215	3.A.1.120.8	1.49e-223	629	gnl|TC-DB|P9WQK3|3.A.1.120.8 Energy-dependent translational throttle protein EttA OS=Mycobacterium tuberculosis (strain ATCC 25618 / H37Rv) OX=83332 GN=ettA PE=1 SV=1	3.A.1.120	3.A.1	ABC	ABC1, ABC2, ABC3 Superfamilies	NA
HHEHPEGL_01290	2.A.6.2.16	1.36e-240	709	gnl|TC-DB|Q9I0Y8|2.A.6.2.16 Resistance-Nodulation-Cell Division - Pseudomonas aeruginosa.	2.A.6.2	2.A.6	RND	Resistance-Nodulation-Cell Division (RND) Superfamily	CHEBI:3603;chloramphenicol|CHEBI:15368;acrolein|CHEBI:87211;fluoroquinolone antibiotic
HHEHPEGL_01379	3.A.23.6.1	3.38e-120	402	gnl|TC-DB|B3ERV6|3.A.23.6.1 Uncharacterized protein OS=Amoebophilus asiaticus (strain 5a2) GN=Aasi_0557 PE=4 SV=1	3.A.23.6	3.A.23	T6SS	ATP-dependent Clp Protease (Clp) Superfamily	NA
HHEHPEGL_01382	3.A.23.6.1	5.01e-101	318	gnl|TC-DB|B3ET73|3.A.23.6.1 Uncharacterized protein OS=Amoebophilus asiaticus (strain 5a2) GN=Aasi_1080 PE=4 SV=1	3.A.23.6	3.A.23	T6SS	ATP-dependent Clp Protease (Clp) Superfamily	NA
HHEHPEGL_01388	3.A.23.6.1	9.65e-105	320	gnl|TC-DB|B3ET67|3.A.23.6.1 Uncharacterized protein OS=Amoebophilus asiaticus (strain 5a2) GN=Aasi_1074 PE=4 SV=1	3.A.23.6	3.A.23	T6SS	ATP-dependent Clp Protease (Clp) Superfamily	NA
HHEHPEGL_01474	3.A.1.106.17	2.77e-122	372	gnl|TC-DB|C1F8I9|3.A.1.106.17 Efflux ABC transporter, permease/ATP-binding protein OS=Acidobacterium capsulatum (strain ATCC 51196 / DSM 11244 / JCM 7670 / NBRC 15755 / NCIMB 13165 / 161) OX=240015 GN=ACP_0113 PE=4 SV=1	3.A.1.106	3.A.1	ABC	ABC1, ABC2, ABC3 Superfamilies	NA
HHEHPEGL_01493	3.A.1.122.25	1.16e-101	305	gnl|TC-DB|WP_014397198|3.A.1.122.25 ABC transporter permease [Corallococcus coralloides]	3.A.1.122	3.A.1	ABC	ABC1, ABC2, ABC3 Superfamilies	NA
HHEHPEGL_01518	1.A.33.1.4	3.79e-237	668	gnl|TC-DB|G4NXA5|1.A.33.1.4 Chaperone protein DnaK OS=Bacillus subtilis subsp. spizizenii TU-B-10 GN=dnaK PE=3 SV=1	NA	NA	NA	NA	NA
HHEHPEGL_01540	2.A.6.2.22	7.38e-241	711	gnl|TC-DB|Q8RTE4|2.A.6.2.22 CmeB - Campylobacter jejuni	2.A.6.2	2.A.6	RND	Resistance-Nodulation-Cell Division (RND) Superfamily	CHEBI:30762;salicylate|CHEBI:8858;rifampicin|CHEBI:3717;ciprofloxacin|CHEBI:7629;norfloxacin|CHEBI:3603;chloramphenicol|CHEBI:3497;cefotaxime|CHEBI:3098;bile acid|CHEBI:9474;tetracycline|CHEBI:42478;ethidium|CHEBI:4841;erythromycin A
HHEHPEGL_01543	3.A.2.1.9	5.37e-176	501	gnl|TC-DB|BAK19931|3.A.2.1.9 ApNa+ATPase beta subunit [Aphanothece halophytica]	NA	NA	NA	NA	CHEBI:49766;sodium(1+)
HHEHPEGL_01549	3.A.2.1.6	2.13e-150	438	gnl|TC-DB|F8L1Z3|3.A.2.1.6 ATP synthase subunit alpha OS=Parachlamydia acanthamoebae (strain UV7) GN=atpA-B PE=3 SV=1	NA	NA	NA	NA	CHEBI:9175;sodium(1+)|CHEBI:5584;hydron
HHEHPEGL_01553	9.B.34.1.5	8.94e-110	357	gnl|TC-DB|J7ZT93|9.B.34.1.5 Diguanylate cyclase (GGDEF) domain-containing protein OS=Bacillus cereus HuA2-4 GN=IG7_01488 PE=4 SV=1	9.B.34.1	9.B.34	KPSH	BART Superfamily	NA
HHEHPEGL_01565	3.A.1.103.5	1.47e-128	365	gnl|TC-DB|P72880|3.A.1.103.5 Transport permease protein OS=Synechocystis sp. (strain PCC 6803 / Kazusa) GN=slr0977 PE=3 SV=1	3.A.1.103	3.A.1	ABC	ABC1, ABC2, ABC3 Superfamilies	CHEBI:4879;ethanol|CHEBI:23008;carbohydrate
HHEHPEGL_01566	3.A.1.103.5	3.96e-122	361	gnl|TC-DB|P72884|3.A.1.103.5 ABC transporter OS=Synechocystis sp. (strain PCC 6803 / Kazusa) GN=rfbB PE=4 SV=1	3.A.1.103	3.A.1	ABC	ABC1, ABC2, ABC3 Superfamilies	CHEBI:4879;ethanol|CHEBI:23008;carbohydrate
HHEHPEGL_01587	2.A.6.1.2	0	1347	gnl|TC-DB|P13511|2.A.6.1.2 COBALT-ZINC-CADMIUM RESISTANCE PROTEIN CZCA (CATION EFFLUX SYSTEM PROTEIN CZCA) - Alcaligenes eutrophus (Ralstonia eutropha).	2.A.6.1	2.A.6	RND	Resistance-Nodulation-Cell Division (RND) Superfamily	CHEBI:3290;cadmium(2+)|CHEBI:23337;cobalt(2+)|CHEBI:10113;zinc(2+)
HHEHPEGL_01588	2.A.6.1.2	2.13e-112	342	gnl|TC-DB|P13510|2.A.6.1.2 Cobalt-zinc-cadmium resistance protein CzcB OS=Ralstonia metallidurans (strain CH34 / ATCC 43123 / DSM 2839) GN=czcB PE=1 SV=2	2.A.6.1	2.A.6	RND	Resistance-Nodulation-Cell Division (RND) Superfamily	CHEBI:3290;cadmium(2+)|CHEBI:23337;cobalt(2+)|CHEBI:10113;zinc(2+)
HHEHPEGL_01613	3.A.2.1.14	2.17e-237	657	gnl|TC-DB|P07677|3.A.2.1.14 ATP synthase subunit beta OS=Bacillus sp. (strain PS3) OX=2334 GN=atpD PE=1 SV=1	NA	NA	NA	NA	CHEBI:5584;hydron
HHEHPEGL_01615	3.A.2.1.6	4.39e-231	644	gnl|TC-DB|F8L1Z3|3.A.2.1.6 ATP synthase subunit alpha OS=Parachlamydia acanthamoebae (strain UV7) GN=atpA-B PE=3 SV=1	NA	NA	NA	NA	CHEBI:9175;sodium(1+)|CHEBI:5584;hydron
HHEHPEGL_01654	2.A.45.2.2	5.4e-109	328	gnl|TC-DB|P0A607|2.A.45.2.2 Uncharacterized transporter Mb2703 OS=Mycobacterium bovis (strain ATCC BAA-935 / AF2122/97) GN=Mb2703 PE=3 SV=1	2.A.45.2	2.A.45	ArsB	IT Superfamily	NA
HHEHPEGL_01759	3.A.1.7.5	6.19e-104	301	gnl|TC-DB|O51236|3.A.1.7.5 Phosphate import ATP-binding protein PstB OS=Borrelia burgdorferi (strain ATCC 35210 / B31 / CIP 102532 / DSM 4680) GN=pstB PE=3 SV=1	3.A.1.7	3.A.1	ABC	ABC1, ABC2, ABC3 Superfamilies	CHEBI:7793;phosphate(3-)
HHEHPEGL_01810	5.A.3.8.1	2.76e-188	565	gnl|TC-DB|Q9S1H0|5.A.3.8.1 Selenate reductase alpha subunit precursor (EC 1.97.1.9) (Selenate reductase molybdenum subunit) - Thauera selenatis.	5.A.3.8	5.A.3	PMO	Iron-Sulfur Protein (ISP) Superfamily	CHEBI:10545;electron
HHEHPEGL_01811	5.A.3.8.1	8.92e-122	353	gnl|TC-DB|Q9S1G9|5.A.3.8.1 Selenate reductase beta subunit (EC 1.97.1.9) (Selenate reductase iron-sulfur subunit) - Thauera selenatis.	5.A.3.8	5.A.3	PMO	Iron-Sulfur Protein (ISP) Superfamily	CHEBI:10545;electron
HHEHPEGL_01861	9.B.157.1.4	6.9e-129	372	gnl|TC-DB|Q8F2L2|9.B.157.1.4 Actin-like ATPase involved in cell morphogenesis OS=Leptospira interrogans serogroup Icterohaemorrhagiae serovar Lai (strain 56601) OX=189518 GN=mreB PE=4 SV=1	NA	NA	NA	NA	NA
HHEHPEGL_01882	2.A.1.59.3	6.65e-110	327	gnl|TC-DB|O28731|2.A.1.59.3 Putative uncharacterized protein OS=Archaeoglobus fulgidus (strain ATCC 49558 / VC-16 / DSM 4304 / JCM 9628 / NBRC 100126) GN=AF_1541 PE=4 SV=1	2.A.1.59	2.A.1	MFS	Major Facilitator (MFS) Superfamily	NA
HHEHPEGL_01905	3.A.9.1.2	9.27e-252	727	gnl|TC-DB|Q9FI56|3.A.9.1.2 Chaperone protein ClpC1, chloroplastic OS=Arabidopsis thaliana GN=CLPC1 PE=1 SV=1	3.A.9.1	3.A.9	CEPT or Tic-Toc	ATP-dependent Clp Protease (Clp) Superfamily	CHEBI:8526;protein polypeptide chain
HHEHPEGL_01908	3.A.3.32.6	2.46e-166	494	gnl|TC-DB|A5UJX0|3.A.3.32.6 Cation transport ATPase, HAD family OS=Methanobrevibacter smithii (strain PS / ATCC 35061 / DSM 861) GN=Msm_0293 PE=4 SV=1	3.A.3.32	3.A.3	P-ATPase	P-type ATPase (P-ATPase) Superfamily	CHEBI:25213;metal cation
HHEHPEGL_01962	3.A.15.2.1	1.52e-140	401	gnl|TC-DB|P24559|3.A.15.2.1 Twitching mobility protein - Pseudomonas aeruginosa.	NA	NA	NA	NA	NA
HHEHPEGL_01963	3.A.15.2.1	1.28e-134	389	gnl|TC-DB|Q51532|3.A.15.2.1 PILU (Twitching motility protein PILU) - Pseudomonas aeruginosa.	NA	NA	NA	NA	NA
HHEHPEGL_02051	2.A.1.35.1	5.62e-147	423	gnl|TC-DB|P52067|2.A.1.35.1 Fosmidomycin resistance protein - Escherichia coli.	2.A.1.35	2.A.1	MFS	Major Facilitator (MFS) Superfamily	CHEBI:443725;fosmidomycin
HHEHPEGL_02055	3.D.1.8.2	4.19e-104	320	gnl|TC-DB|Q8DMR6|3.D.1.8.2 NAD(P)H-quinone oxidoreductase subunit 2 OS=Thermosynechococcus elongatus (strain BP-1) OX=197221 GN=ndhB PE=3 SV=1	3.D.1.8	3.D.1	NDH	Iron-Sulfur Protein (ISP) Superfamily	CHEBI:24636;proton
HHEHPEGL_02056	3.D.1.2.1	3.09e-144	424	gnl|TC-DB|P29925|3.D.1.2.1 NADH-ubiquinone oxidoreductase chain 13 (EC 1.6.5.3) (NADH dehydrogenase 1, chain 13) (NDH-1, chain 13) - Paracoccus denitrificans.	3.D.1.2	3.D.1	NDH	Iron-Sulfur Protein (ISP) Superfamily	CHEBI:5584;hydron
HHEHPEGL_02057	3.D.1.2.1	1.87e-169	499	gnl|TC-DB|P29924|3.D.1.2.1 NADH-ubiquinone oxidoreductase chain 12 (EC 1.6.5.3) (NADH dehydrogenase 1, chain 12) (NDH-1, chain 12) - Paracoccus denitrificans.	3.D.1.2	3.D.1	NDH	Iron-Sulfur Protein (ISP) Superfamily	CHEBI:5584;hydron
HHEHPEGL_02061	3.D.1.5.1	4.91e-125	361	gnl|TC-DB|Q746T2|3.D.1.5.1 NADH-quinone oxidoreductase subunit H 2 - Geobacter sulfurreducens.	3.D.1.5	3.D.1	NDH	Iron-Sulfur Protein (ISP) Superfamily	CHEBI:5584;hydron
HHEHPEGL_02064	3.D.1.5.1	8.46e-223	630	gnl|TC-DB|Q74GA3|3.D.1.5.1 NADH dehydrogenase I, F subunit - Geobacter sulfurreducens.	3.D.1.5	3.D.1	NDH	Iron-Sulfur Protein (ISP) Superfamily	CHEBI:5584;hydron
HHEHPEGL_02066	3.D.1.5.1	3.57e-183	513	gnl|TC-DB|Q74GA5|3.D.1.5.1 NADH dehydrogenase I, D subunit - Geobacter sulfurreducens.	3.D.1.5	3.D.1	NDH	Iron-Sulfur Protein (ISP) Superfamily	CHEBI:5584;hydron
HHEHPEGL_02090	3.A.15.4.1	5.86e-139	409	gnl|TC-DB|Q8F3M7|3.A.15.4.1 Type II secretory pathway ATPase protein E OS=Leptospira interrogans serogroup Icterohaemorrhagiae serovar Lai (strain 56601) GN=gspE PE=4 SV=1	NA	NA	NA	NA	CHEBI:8526;protein polypeptide chain
HHEHPEGL_02101	3.A.11.1.5	9.12e-167	494	gnl|TC-DB|AKM80112|3.A.11.1.5 putative ATP-dependent DNA helicase [Candidatus Saccharibacteria bacterium GW2011_GWC2_44_17]	NA	NA	NA	NA	NA
HHEHPEGL_02139	3.D.10.1.9	1.69e-160	470	gnl|TC-DB|I7FYK4|3.D.10.1.9 Succinate dehydrogenase flavoprotein subunit OS=Mycolicibacterium smegmatis (strain ATCC 700084 / mc(2)155) OX=246196 GN=sdhA PE=3 SV=1	3.D.10.1	3.D.10	SDH	Iron-Sulfur Protein (ISP) Superfamily	CHEBI:24636;proton|CHEBI:30031;succinate(2-)|CHEBI:29806;fumarate(2-)|CHEBI:10545;electron
HHEHPEGL_02151	9.B.34.1.5	2.16e-109	353	gnl|TC-DB|J7ZT93|9.B.34.1.5 Diguanylate cyclase (GGDEF) domain-containing protein OS=Bacillus cereus HuA2-4 GN=IG7_01488 PE=4 SV=1	9.B.34.1	9.B.34	KPSH	BART Superfamily	NA
HHEHPEGL_02177	4.H.1.1.10	0	1188	gnl|TC-DB|RIJ99294|4.H.1.1.10 bifunctional lysylphosphatidylglycerol flippase/synthetase MprF [Candidatus Brocadia sp.]	4.H.1.1	4.H.1	MprF	Major Facilitator (MFS) Superfamily	NA
HHEHPEGL_02185	8.A.5.1.4	3.3e-142	403	gnl|TC-DB|P80874|8.A.5.1.4 General stress protein 69 OS=Bacillus subtilis (strain 168) GN=yhdN PE=1 SV=2	NA	NA	NA	NA	NA
HHEHPEGL_02192	9.B.111.1.5	2.39e-113	354	gnl|TC-DB|WP_121250785|9.B.111.1.5 lysine--tRNA ligase [Solirubrobacter pauli]	9.B.111.1	9.B.111	LysS	Major Facilitator (MFS) Superfamily	NA
HHEHPEGL_02241	3.A.15.4.1	1.34e-142	420	gnl|TC-DB|Q8F3M7|3.A.15.4.1 Type II secretory pathway ATPase protein E OS=Leptospira interrogans serogroup Icterohaemorrhagiae serovar Lai (strain 56601) GN=gspE PE=4 SV=1	NA	NA	NA	NA	CHEBI:8526;protein polypeptide chain
HHEHPEGL_02242	3.A.15.4.1	1.34e-151	446	gnl|TC-DB|Q8F3M7|3.A.15.4.1 Type II secretory pathway ATPase protein E OS=Leptospira interrogans serogroup Icterohaemorrhagiae serovar Lai (strain 56601) GN=gspE PE=4 SV=1	NA	NA	NA	NA	CHEBI:8526;protein polypeptide chain
HHEHPEGL_02260	1.A.35.3.2	4.1e-124	360	gnl|TC-DB|Q9WZ31|1.A.35.3.2 Magnesium transport protein CorA OS=Thermotoga maritima (strain ATCC 43589 / MSB8 / DSM 3109 / JCM 10099) GN=corA PE=1 SV=1	NA	NA	NA	NA	CHEBI:6635;magnesium(2+)|CHEBI:23337;cobalt(2+)
HHEHPEGL_02276	3.A.3.5.18	3e-181	536	gnl|TC-DB|O32220|3.A.3.5.18 Copper-transporting P-type ATPase copA - Bacillus subtilis.	3.A.3.5	3.A.3	P-ATPase	P-type ATPase (P-ATPase) Superfamily	CHEBI:49551;copper(1+)
HHEHPEGL_02296	3.A.11.1.5	8.81e-106	337	gnl|TC-DB|AKM80781.1|3.A.11.1.5 hypothetical protein UW38_C0001G0951 [Candidatus Saccharibacteria bacterium GW2011_GWC2_44_17]	NA	NA	NA	NA	NA
HHEHPEGL_02303	3.A.10.1.10	2.49e-283	798	gnl|TC-DB|A6L2M4|3.A.10.1.10 Putative K(+)-stimulated pyrophosphate-energized sodium pump OS=Bacteroides vulgatus (strain ATCC 8482 / DSM 1447 / NCTC 11154) GN=hppA PE=3 SV=1	NA	NA	NA	NA	CHEBI:9175;sodium(1+)|CHEBI:5584;hydron
HHEHPEGL_02447	3.A.23.6.1	6.44e-130	373	gnl|TC-DB|B3ET62|3.A.23.6.1 Glyceraldehyde-3-phosphate dehydrogenase OS=Amoebophilus asiaticus (strain 5a2) GN=Aasi_1069 PE=3 SV=1	3.A.23.6	3.A.23	T6SS	ATP-dependent Clp Protease (Clp) Superfamily	NA
HHEHPEGL_02468	2.A.6.2.39	1.46e-299	859	gnl|TC-DB|Q9I0V6|2.A.6.2.39 Probable Resistance-Nodulation-Cell Division (RND) efflux transporter OS=Pseudomonas aeruginosa GN=PA2527 PE=4 SV=1	2.A.6.2	2.A.6	RND	Resistance-Nodulation-Cell Division (RND) Superfamily	CHEBI:2960;aztreonam|CHEBI:7644;novobiocin|CHEBI:9474;tetracycline|CHEBI:25106;macrolide
HHEHPEGL_02507	3.D.1.9.2	2.92e-119	362	gnl|TC-DB|P16431|3.D.1.9.2 Formate hydrogenlyase subunit 5 OS=Escherichia coli (strain K12) GN=hycE PE=1 SV=1	3.D.1.9	3.D.1	NDH	Iron-Sulfur Protein (ISP) Superfamily	CHEBI:5584;hydron
HHEHPEGL_02558	3.A.3.2.21	3.67e-257	741	gnl|TC-DB|A9BJX0|3.A.3.2.21 Calcium-translocating P-type ATPase, PMCA-type OS=Petrotoga mobilis (strain DSM 10674 / SJ95) GN=Pmob_0991 PE=3 SV=1	3.A.3.2	3.A.3	P-ATPase	P-type ATPase (P-ATPase) Superfamily	CHEBI:3308;calcium(2+)
HHEHPEGL_02593	3.D.1.5.1	6.25e-203	578	gnl|TC-DB|Q74GA3|3.D.1.5.1 NADH dehydrogenase I, F subunit - Geobacter sulfurreducens.	3.D.1.5	3.D.1	NDH	Iron-Sulfur Protein (ISP) Superfamily	CHEBI:5584;hydron
HHEHPEGL_02596	3.D.1.9.2	7.82e-172	515	gnl|TC-DB|P07658|3.D.1.9.2 Formate dehydrogenase H OS=Escherichia coli (strain K12) GN=fdhF PE=1 SV=2	3.D.1.9	3.D.1	NDH	Iron-Sulfur Protein (ISP) Superfamily	CHEBI:5584;hydron
HHEHPEGL_02597	3.A.1.120.6	2.95e-198	569	gnl|TC-DB|P43672|3.A.1.120.6 ABC transporter ATP-binding protein uup OS=Escherichia coli (strain K12) GN=uup PE=1 SV=2	3.A.1.120	3.A.1	ABC	ABC1, ABC2, ABC3 Superfamilies	NA
HHEHPEGL_02609	9.B.34.1.8	7.72e-121	399	gnl|TC-DB|WP_128121392.1|9.B.34.1.8 EAL domain-containing protein [Pseudomonas zhaodongensis]	9.B.34.1	9.B.34	KPSH	BART Superfamily	NA

## Sheet: ATM01
ORF	Classification	Subclassification	k number	ko definition	ko name	blastp subject	blastp evalue	blastp bitscore
ECNLFNEI_00084	Carbon	Glycolysis	K25026	glucokinase?	glk	NUM38409.1 ROK family protein [Armatimonadetes bacterium]	3.17e-227	630
ECNLFNEI_00487	Oxygen	Terminal oxidase	K02274	cytochrome c oxidase subunit I (HCO class A)	coxA, ctaD	KAA0239666.1 cytochrome c oxidase subunit I [Armatimonadetes bacterium]	0	1124
ECNLFNEI_00487	Oxygen	Terminal oxidase	K02274	cytochrome c oxidase subunit I (HCO class B/C)		KAA0239666.1 cytochrome c oxidase subunit I [Armatimonadetes bacterium]	0	1124
ECNLFNEI_00664	Nitrogen	DNRA/denitrification/nitrification	K00371	nitrate reductase / nitrite oxidoreductase, beta subunit	narH/nxrB	MBL1152428.1 nitrate oxidoreductase subunit beta [Armatimonadetes bacterium]	0	909
ECNLFNEI_00666	Nitrogen	DNRA/denitrification/nitrification	K00370	nitrate reductase / nitrite oxidoreductase, alpha subunit	narG/nxrA	KAA0236624.1 nitrate oxidoreductase subunit alpha [Armatimonadetes bacterium]	0	2464
ECNLFNEI_00794	Carbon	propionate assimilation	K01720	2-methylcitrate dehydratase	prpD	NUM38957.1 MmgE/PrpD family protein [Armatimonadetes bacterium]	0	1041
ECNLFNEI_00884	Carbon	Glycolysis	K21071	ATP-dependent phosphofructokinase	pfk	MBL1151203.1 phosphofructokinase [Armatimonadetes bacterium]	1.37e-285	782
ECNLFNEI_00908	Carbon	Glycolysis	K00873	pyruvate kinase	pyk	KAA0239419.1 pyruvate kinase [Armatimonadetes bacterium]	0	909
ECNLFNEI_01087	Oxygen	ROS defense	K03671	thioredoxin 1	trxA	KAA0240625.1 thioredoxin [Armatimonadetes bacterium]	1.6e-71	218
ECNLFNEI_01111	Carbon	Gluconeogenesis	K02446	fructose-1,6-bisphosphatase II	glpX	QOJ11719.1 class II fructose-bisphosphatase [Chthonomonadaceae bacterium]	2.85e-230	637
ECNLFNEI_01149	Carbon	Gluconeogenesis	K01610	phosphoenolpyruvate carboxykinase (ATP)	pckA	NUM38828.1 phosphoenolpyruvate carboxykinase (ATP) [Armatimonadetes bacterium]	0	1053
ECNLFNEI_01310	Carbon	propionate assimilation	K03417	methylisocitrate lyase	prpB	NUM38766.1 methylisocitrate lyase [Armatimonadetes bacterium]	3.37e-208	579
ECNLFNEI_01389	Oxygen	ROS defense	K00384	thioredoxin reductase (NADPH)	trxB, TRR	MBL1152083.1 thioredoxin-disulfide reductase [Armatimonadetes bacterium]	1.26e-232	642
ECNLFNEI_01409	Oxygen	ROS defense	K00432	glutathione peroxidase	gpx, btuE, bsaA	BBO24794.1 glutathione peroxidase [Candidatus Nitrosymbiomonas proteolyticus]	5.73e-131	374
ECNLFNEI_01450	Carbon	Glycolysis	K00850	6-phosphofructokinase 1	pfkA	NOG37904.1 6-phosphofructokinase [Armatimonadetes bacterium]	9.68e-211	586
ECNLFNEI_01457	Carbon	lactate fermentation	K00016	L-lactate dehydrogenase	ldh	KXK10344.1 lactate dehydrogenase [Armatimonadetes bacterium OLB18]	8.52e-206	574
ECNLFNEI_01974	Carbon	formate oxidation	K00123	formate dehydrogenase major subunit	fdoG, fdhF, fdwA	RIK00953.1 formate dehydrogenase subunit alpha [Armatimonadetes bacterium]	0	1224
ECNLFNEI_02043	Nitrogen	DNRA	K15876	cytochrome c nitrite reductase small subunit	nrfH	BBO24524.1 cytochrome c-type protein NrfH [Candidatus Nitrosymbiomonas proteolyticus]	2.61e-138	393
ECNLFNEI_02044	Nitrogen	DNRA	K03385	nitrite reductase (cytochrome c-552)	nrfA	MBL1153227.1 ammonia-forming cytochrome c nitrite reductase subunit c552 [Armatimonadetes bacterium]	0	980
ECNLFNEI_02318	Carbon	acetate assimilation	K01895	acetyl-CoA synthetase	acs	KXK15842.1 hypothetical protein UZ18_ATM001001494 [Armatimonadetes bacterium OLB18]	5.11e-117	338
Extracellular carbohydrate-Active Enzyme
ORF	CAZy classes	evalue	bitscore	Activities
ECNLFNEI_00212	GH0			Glycoside hydrolases not yet assigned to a family.
ECNLFNEI_00586	GH0			Glycoside hydrolases not yet assigned to a family.
ECNLFNEI_02288	PL0			Polysaccharide lyases not yet assigned to a family.
Extracellular peptidase
ORF	MEROPS Classification	evalue	bitscore	Catalytic type	MEROPS Name
ECNLFNEI_00837	S08.UPA			Serine	subfamily S8A unassigned peptidases
ECNLFNEI_01803	S08.UPA			Serine	subfamily S8A unassigned peptidases
Transporter
ORF	TCID	evalue	bitscore	gene.product	Subfamily	Family	Fam_abbreviation	Superfamily	substrate
ECNLFNEI_00036	3.A.15.4.1	1.58e-111	338	gnl|TC-DB|Q8F3M7|3.A.15.4.1 Type II secretory pathway ATPase protein E OS=Leptospira interrogans serogroup Icterohaemorrhagiae serovar Lai (strain 56601) GN=gspE PE=4 SV=1	NA	NA	NA	NA	CHEBI:8526;protein polypeptide chain
ECNLFNEI_00091	3.A.9.1.2	2.98e-306	864	gnl|TC-DB|Q9FI56|3.A.9.1.2 Chaperone protein ClpC1, chloroplastic OS=Arabidopsis thaliana GN=CLPC1 PE=1 SV=1	3.A.9.1	3.A.9	CEPT or Tic-Toc	ATP-dependent Clp Protease (Clp) Superfamily	CHEBI:8526;protein polypeptide chain
ECNLFNEI_00108	3.A.15.4.1	1.75e-131	394	gnl|TC-DB|Q8F3M7|3.A.15.4.1 Type II secretory pathway ATPase protein E OS=Leptospira interrogans serogroup Icterohaemorrhagiae serovar Lai (strain 56601) GN=gspE PE=4 SV=1	NA	NA	NA	NA	CHEBI:8526;protein polypeptide chain
ECNLFNEI_00202	1.A.104.1.2	4.94e-173	512	gnl|TC-DB|NCD33588.1|1.A.104.1.2 flagellar biosynthesis protein FlhA [Spartobacteria bacterium]	NA	NA	NA	NA	NA
ECNLFNEI_00227	3.D.2.2.1	3.77e-127	376	gnl|TC-DB|P0C188|3.D.2.2.1 NAD(P) transhydrogenase subunit beta - Rhodospirillum rubrum.	NA	NA	NA	NA	CHEBI:5584;hydron
ECNLFNEI_00280	3.A.11.1.3	1.78e-103	313	gnl|TC-DB|Q8VRL3|3.A.11.1.3 Competence protein PilC OS=Thermus thermophilus GN=pilC PE=3 SV=1	NA	NA	NA	NA	CHEBI:75980;single-stranded DNA polynucleotide
ECNLFNEI_00281	3.A.11.1.5	1.99e-116	342	gnl|TC-DB|AKM80721.1|3.A.11.1.5 twitching motility protein [Candidatus Saccharibacteria bacterium GW2011_GWC2_44_17]	NA	NA	NA	NA	NA
ECNLFNEI_00282	3.A.15.4.1	8.66e-130	391	gnl|TC-DB|Q8F3M7|3.A.15.4.1 Type II secretory pathway ATPase protein E OS=Leptospira interrogans serogroup Icterohaemorrhagiae serovar Lai (strain 56601) GN=gspE PE=4 SV=1	NA	NA	NA	NA	CHEBI:8526;protein polypeptide chain
ECNLFNEI_00312	2.A.33.1.1	5.09e-109	327	gnl|TC-DB|P13738|2.A.33.1.1 NA(+)/H(+) ANTIPORTER 1 (SODIUM/PROTON ANTIPORTER 1) - Escherichia coli.	NA	NA	NA	NA	CHEBI:9175;sodium(1+)|CHEBI:24636;proton
ECNLFNEI_00411	3.A.2.1.5	4.08e-220	613	gnl|TC-DB|P50002|3.A.2.1.5 ATP synthase subunit beta, sodium ion specific OS=Acetobacterium woodii (strain ATCC 29683 / DSM 1030 / JCM 2381 / KCTC 1655) GN=atpD PE=1 SV=3	NA	NA	NA	NA	CHEBI:9175;sodium(1+)
ECNLFNEI_00487	3.D.4.4.4	2.59e-154	452	gnl|TC-DB|Q8DHE9|3.D.4.4.4 Cytochrome c oxidase subunit 1 OS=Thermosynechococcus elongatus (strain BP-1) GN=ctaD PE=3 SV=1	NA	NA	NA	NA	CHEBI:5584;hydron
ECNLFNEI_00623	3.A.12.1.1	6.17e-148	449	gnl|TC-DB|P21458|3.A.12.1.1 Stage III sporulation protein E - Bacillus subtilis.	NA	NA	NA	NA	CHEBI:4291;deoxyribonucleic acid
ECNLFNEI_00654	3.A.11.1.5	1.94e-107	320	gnl|TC-DB|AKM80721.1|3.A.11.1.5 twitching motility protein [Candidatus Saccharibacteria bacterium GW2011_GWC2_44_17]	NA	NA	NA	NA	NA
ECNLFNEI_00655	3.A.15.2.1	6.36e-124	360	gnl|TC-DB|P24559|3.A.15.2.1 Twitching mobility protein - Pseudomonas aeruginosa.	NA	NA	NA	NA	NA
ECNLFNEI_00703	2.A.3.14.1	2.68e-127	390	gnl|TC-DB|A4X503|2.A.3.14.1 Putative uncharacterized protein OS=Salinispora tropica (strain ATCC BAA-916 / DSM 44818 / CNB-440) GN=Strop_1487 PE=4 SV=1	2.A.3.14	2.A.3	APC	APC Superfamily	NA
ECNLFNEI_00740	2.A.6.3.2	9.01e-151	478	gnl|TC-DB|A9CGX6|2.A.6.3.2 AcrB/AcrD/AcrF family protein OS=Agrobacterium tumefaciens (strain C58 / ATCC 33970) GN=Atu4636 PE=4 SV=1	2.A.6.3	2.A.6	RND	Resistance-Nodulation-Cell Division (RND) Superfamily	NA
ECNLFNEI_00741	3.A.3.6.22	6.78e-114	355	gnl|TC-DB|A3T2G5|3.A.3.6.22 Cadmium translocating P-type ATPase OS=Sulfitobacter sp. NAS-14.1 GN=NAS141_02821 PE=3 SV=1	3.A.3.6	3.A.3	P-ATPase	P-type ATPase (P-ATPase) Superfamily	CHEBI:23337;cobalt(2+)
ECNLFNEI_00826	3.A.15.4.1	3.04e-147	433	gnl|TC-DB|Q8F3M7|3.A.15.4.1 Type II secretory pathway ATPase protein E OS=Leptospira interrogans serogroup Icterohaemorrhagiae serovar Lai (strain 56601) GN=gspE PE=4 SV=1	NA	NA	NA	NA	CHEBI:8526;protein polypeptide chain
ECNLFNEI_00857	9.B.157.1.1	1.49e-113	330	gnl|TC-DB|Q01465|9.B.157.1.1 Rod shape-determining protein MreB OS=Bacillus subtilis (strain 168) GN=mreB PE=3 SV=3	NA	NA	NA	NA	CHEBI:5140;folic acid
ECNLFNEI_00882	3.D.1.2.1	5.3e-139	404	gnl|TC-DB|P29913|3.D.1.2.1 NADH-UBIQUINONE OXIDOREDUCTASE CHAIN 1 (EC 1.6.5.3) (NADH DEHYDROGENASE 1, CHAIN 1) (NDH-1, CHAIN 1) - Paracoccus denitrificans.	3.D.1.2	3.D.1	NDH	Iron-Sulfur Protein (ISP) Superfamily	CHEBI:5584;hydron
ECNLFNEI_00892	3.D.1.2.1	2.87e-128	385	gnl|TC-DB|P29925|3.D.1.2.1 NADH-ubiquinone oxidoreductase chain 13 (EC 1.6.5.3) (NADH dehydrogenase 1, chain 13) (NDH-1, chain 13) - Paracoccus denitrificans.	3.D.1.2	3.D.1	NDH	Iron-Sulfur Protein (ISP) Superfamily	CHEBI:5584;hydron
ECNLFNEI_00893	3.D.1.3.1	6.87e-128	392	gnl|TC-DB|Q56227|3.D.1.3.1 NADH-quinone oxidoreductase chain 12 (EC 1.6.99.5) (NADH dehydrogenase I, chain 12) (NDH-1, chain 12) - Thermus thermophilus.	3.D.1.3	3.D.1	NDH	Iron-Sulfur Protein (ISP) Superfamily	CHEBI:5584;hydron
ECNLFNEI_00934	3.A.15.4.1	3.74e-131	394	gnl|TC-DB|Q8F3M7|3.A.15.4.1 Type II secretory pathway ATPase protein E OS=Leptospira interrogans serogroup Icterohaemorrhagiae serovar Lai (strain 56601) GN=gspE PE=4 SV=1	NA	NA	NA	NA	CHEBI:8526;protein polypeptide chain
ECNLFNEI_01013	9.A.8.1.5	1.43e-173	504	gnl|TC-DB|Q7MVL1|9.A.8.1.5 Ferrous iron transport protein B - Porphyromonas gingivalis (Bacteroides gingivalis).	NA	NA	NA	NA	CHEBI:34754;iron(2+)
ECNLFNEI_01053	2.A.6.1.13	0	956	gnl|TC-DB|Q9RLI8|2.A.6.1.13 CzrA protein OS=Pseudomonas aeruginosa GN=czrA PE=4 SV=1	2.A.6.1	2.A.6	RND	Resistance-Nodulation-Cell Division (RND) Superfamily	CHEBI:3290;cadmium(2+)|CHEBI:10113;zinc(2+)
ECNLFNEI_01061	3.A.1.2.17	8.81e-101	311	gnl|TC-DB|A2RKA7|3.A.1.2.17 Purine/cytidine ABC transporter ATP-binding protein OS=Lactococcus lactis subsp. cremoris (strain MG1363) GN=nupA PE=4 SV=1	3.A.1.2	3.A.1	ABC	ABC1, ABC2, ABC3 Superfamilies	CHEBI:7647;nucleoside
ECNLFNEI_01070	3.A.29.1.4	6.57e-185	537	gnl|TC-DB|O67077|3.A.29.1.4 ATP-dependent zinc metalloprotease FtsH OS=Aquifex aeolicus (strain VF5) OX=224324 GN=ftsH PE=1 SV=1	3.A.29.1	3.A.29	MIMP	AAA-ATPase Superfamily	NA
ECNLFNEI_01132	9.B.29.2.12	6.8e-109	313	gnl|TC-DB|A3U437|9.B.29.2.12 Suf C, ATPase OS=Pseudooceanicola batsensis (strain ATCC BAA-863 / DSM 15984 / KCTC 12145 / HTCC2597) OX=252305 GN=OB2597_03564 PE=4 SV=1	9.B.29.2	9.B.29	4-5PC	YIP Superfamily	NA
ECNLFNEI_01183	2.A.6.3.6	1.44e-101	343	gnl|TC-DB|Q8CX78|2.A.6.3.6 Acriflavine resistance protein (Cation efflux system) OS=Oceanobacillus iheyensis (strain DSM 14371 / JCM 11309 / KCTC 3954 / HTE831) GN=OB2940 PE=4 SV=1	2.A.6.3	2.A.6	RND	Resistance-Nodulation-Cell Division (RND) Superfamily	NA
ECNLFNEI_01267	3.D.10.1.4	9.88e-112	345	gnl|TC-DB|F9VN10|3.D.10.1.4 Succinate dehydrogenase flavoprotein subunit OS=Sulfolobus tokodaii (strain DSM 16993 / JCM 10545 / NBRC 100140 / 7) GN=sdhA PE=4 SV=1	3.D.10.1	3.D.10	SDH	Iron-Sulfur Protein (ISP) Superfamily	CHEBI:30031;succinate(2-)|CHEBI:8730;1,4-benzoquinone
ECNLFNEI_01286	3.D.1.5.1	3.17e-148	425	gnl|TC-DB|Q74GA5|3.D.1.5.1 NADH dehydrogenase I, D subunit - Geobacter sulfurreducens.	3.D.1.5	3.D.1	NDH	Iron-Sulfur Protein (ISP) Superfamily	CHEBI:5584;hydron
ECNLFNEI_01295	3.A.3.5.18	4.89e-165	487	gnl|TC-DB|O32220|3.A.3.5.18 Copper-transporting P-type ATPase copA - Bacillus subtilis.	3.A.3.5	3.A.3	P-ATPase	P-type ATPase (P-ATPase) Superfamily	CHEBI:49551;copper(1+)
ECNLFNEI_01400	3.A.2.1.10	3.48e-220	616	gnl|TC-DB|BAK19946|3.A.2.1.10 ApH+ATPase alpha subunit [Aphanothece halophytica]	NA	NA	NA	NA	NA
ECNLFNEI_01407	3.A.11.1.5	3e-147	441	gnl|TC-DB|AKM80112|3.A.11.1.5 putative ATP-dependent DNA helicase [Candidatus Saccharibacteria bacterium GW2011_GWC2_44_17]	NA	NA	NA	NA	NA
ECNLFNEI_01517	3.A.11.1.5	1.51e-121	358	gnl|TC-DB|AKM80721.1|3.A.11.1.5 twitching motility protein [Candidatus Saccharibacteria bacterium GW2011_GWC2_44_17]	NA	NA	NA	NA	NA
ECNLFNEI_01519	3.A.15.4.1	6.59e-154	452	gnl|TC-DB|Q8F3M7|3.A.15.4.1 Type II secretory pathway ATPase protein E OS=Leptospira interrogans serogroup Icterohaemorrhagiae serovar Lai (strain 56601) GN=gspE PE=4 SV=1	NA	NA	NA	NA	CHEBI:8526;protein polypeptide chain
ECNLFNEI_01548	3.A.1.135.10	1.21e-110	347	gnl|TC-DB|A4XGX0|3.A.1.135.10 ABC transporter related protein OS=Caldicellulosiruptor saccharolyticus (strain ATCC 43494 / DSM 8903 / Tp8T 6331) OX=351627 GN=Csac_0521 PE=4 SV=1	3.A.1.135	3.A.1	ABC	ABC1, ABC2, ABC3 Superfamilies	NA
ECNLFNEI_01570	3.A.6.1.1	1.01e-147	427	gnl|TC-DB|P40290|3.A.6.1.1 PROBABLE ATP SYNTHASE YSCN (EC 3.6.1.34) (YOPS SECRETION ATPASE) - Yersinia enterocolitica.	NA	NA	NA	NA	CHEBI:8526;protein polypeptide chain
ECNLFNEI_01599	9.B.157.1.4	5.07e-112	327	gnl|TC-DB|Q8F2L2|9.B.157.1.4 Actin-like ATPase involved in cell morphogenesis OS=Leptospira interrogans serogroup Icterohaemorrhagiae serovar Lai (strain 56601) OX=189518 GN=mreB PE=4 SV=1	NA	NA	NA	NA	NA
ECNLFNEI_01609	3.A.9.1.2	3.13e-247	716	gnl|TC-DB|Q9FI56|3.A.9.1.2 Chaperone protein ClpC1, chloroplastic OS=Arabidopsis thaliana GN=CLPC1 PE=1 SV=1	3.A.9.1	3.A.9	CEPT or Tic-Toc	ATP-dependent Clp Protease (Clp) Superfamily	CHEBI:8526;protein polypeptide chain
ECNLFNEI_01626	3.A.1.1.24	2.71e-140	403	gnl|TC-DB|Q72L52|3.A.1.1.24 Sugar-binding transport ATP-binding protein - Thermus thermophilus (strain HB27 / ATCC BAA-163 / DSM 7039).	3.A.1.1	3.A.1	ABC	ABC1, ABC2, ABC3 Superfamilies	CHEBI:5418;glucose|CHEBI:14575;mannose
ECNLFNEI_01645	3.A.10.2.2	8.16e-140	440	gnl|TC-DB|Q6BCL0|3.A.10.2.2 H+-pyrophosphatase - Streptomyces coelicolor.	NA	NA	NA	NA	CHEBI:5584;hydron
ECNLFNEI_01673	3.A.5.1.1	6.26e-133	390	gnl|TC-DB|P0AGD7|3.A.5.1.1 Signal recognition particle protein - Escherichia coli.	3.A.5.1	3.A.5	Sec	Ankyrin Repeat Domain-containing (Ank) Superfamily	CHEBI:8526;protein polypeptide chain
ECNLFNEI_01706	1.B.14.17.1	1.41e-162	501	gnl|TC-DB|C6VV84|1.B.14.17.1 Uncharacterized protein OS=Dyadobacter fermentans (strain ATCC 700827 / DSM 18053 / NS114) GN=Dfer_3702 PE=4 SV=1	1.B.14.17	1.B.14	OMR	Outer Membrane Pore-forming Protein I (OMPP-I) Superfamily	NA
ECNLFNEI_01736	3.A.9.1.1	2.82e-248	701	gnl|TC-DB|Q02028|3.A.9.1.1 Stromal 70 kDa heat shock-related protein, chloroplast precursor - Pisum sativum (Garden pea).	3.A.9.1	3.A.9	CEPT or Tic-Toc	ATP-dependent Clp Protease (Clp) Superfamily	CHEBI:8526;protein polypeptide chain
ECNLFNEI_01756	9.B.299.1.3	1.06e-114	373	gnl|TC-DB|WP_044035693.1|9.B.299.1.3 membrane protein [Clostridium bornimense]	NA	NA	NA	NA	NA
ECNLFNEI_01762	3.A.1.7.5	2.54e-109	315	gnl|TC-DB|O51236|3.A.1.7.5 Phosphate import ATP-binding protein PstB OS=Borrelia burgdorferi (strain ATCC 35210 / B31 / CIP 102532 / DSM 4680) GN=pstB PE=3 SV=1	3.A.1.7	3.A.1	ABC	ABC1, ABC2, ABC3 Superfamilies	CHEBI:7793;phosphate(3-)
ECNLFNEI_01784	3.A.1.2.20	1.53e-130	387	gnl|TC-DB|G4FGN3|3.A.1.2.20 Monosaccharide-transporting ATPase OS=Thermotoga maritima (strain ATCC 43589 / MSB8 / DSM 3109 / JCM 10099) GN=ThemaDRAFT_1375 PE=3 SV=1	3.A.1.2	3.A.1	ABC	ABC1, ABC2, ABC3 Superfamilies	CHEBI:10085;xylose|CHEBI:5418;glucose
ECNLFNEI_01864	9.A.8.1.6	1.03e-137	424	gnl|TC-DB|Q7MV19|9.A.8.1.6 Ferrous iron transport protein B - Porphyromonas gingivalis (Bacteroides gingivalis).	NA	NA	NA	NA	CHEBI:29035;manganese(2+)
ECNLFNEI_01974	3.D.1.9.2	2.14e-135	411	gnl|TC-DB|P07658|3.D.1.9.2 Formate dehydrogenase H OS=Escherichia coli (strain K12) GN=fdhF PE=1 SV=2	3.D.1.9	3.D.1	NDH	Iron-Sulfur Protein (ISP) Superfamily	CHEBI:5584;hydron
ECNLFNEI_02107	3.A.5.1.1	2.87e-244	712	gnl|TC-DB|P10408|3.A.5.1.1 PREPROTEIN TRANSLOCASE SECA SUBUNIT - Escherichia coli.	3.A.5.1	3.A.5	Sec	Ankyrin Repeat Domain-containing (Ank) Superfamily	CHEBI:8526;protein polypeptide chain
ECNLFNEI_02280	3.A.1.2.20	5.93e-142	417	gnl|TC-DB|G4FGN3|3.A.1.2.20 Monosaccharide-transporting ATPase OS=Thermotoga maritima (strain ATCC 43589 / MSB8 / DSM 3109 / JCM 10099) GN=ThemaDRAFT_1375 PE=3 SV=1	3.A.1.2	3.A.1	ABC	ABC1, ABC2, ABC3 Superfamilies	CHEBI:10085;xylose|CHEBI:5418;glucose
ECNLFNEI_02326	3.D.10.1.1	5.06e-225	636	gnl|TC-DB|Q65GF4|3.D.10.1.1 SdhA OS=Bacillus licheniformis (strain DSM 13 / ATCC 14580) GN=sdhA PE=4 SV=1	3.D.10.1	3.D.10	SDH	Iron-Sulfur Protein (ISP) Superfamily	CHEBI:30031;succinate(2-)|CHEBI:42511;fumarate(2-)|CHEBI:6749;menaquinone

## Sheet: CFX01
ORF	Metabolism	Subclassification	k number	ko definition	ko name	blastp subject	blastp evalue	blastp bitscore
MAPEBKBH_00365	Carbon	acetate assimilation	K01895	acetyl-CoA synthetase	acs	MBE2194942.1 acetate--CoA ligase [Anaerolinea sp.]	0	1323
MAPEBKBH_00289	Carbon	Acetate fermentation	K01512	acylphosphatase	acyP	MBE2196896.1 acylphosphatase [Anaerolinea sp.]	2.81e-72	220
MAPEBKBH_00275	Carbon	Gluconeogenesis	K03841	fructose-1,6-bisphosphatase I	fbp	MBE2196882.1 class 1 fructose-bisphosphatase [Anaerolinea sp.]	3.1e-261	718
MAPEBKBH_01983	Carbon	Gluconeogenesis	K01596	phosphoenolpyruvate carboxykinase (GTP)	pckA	CAG1015503.1 phosphoenolpyruvate carboxykinase (GTP) [Anaerolineae bacterium]	0	1296
MAPEBKBH_00372	Carbon	Glycolysis	K00850	6-phosphofructokinase 1	pfkA	MBE2196512.1 6-phosphofructokinase [Anaerolinea sp.]	8.72e-222	615
MAPEBKBH_00471	Carbon	Glycolysis	K25026	glucokinase	glk	MBE2196284.1 ROK family protein [Anaerolinea sp.]	1.56e-216	602
MAPEBKBH_00713	Carbon	Glycolysis	K00886	polyphosphate glucokinase	ppgK	MBE2194542.1 ROK family protein [Anaerolinea sp.]	2.84e-175	492
MAPEBKBH_01580	Carbon	Glycolysis	K00850	6-phosphofructokinase 1	pfkA	MBE2196506.1 6-phosphofructokinase [Anaerolinea sp.]	0	1471
MAPEBKBH_02195	Carbon	Glycolysis	K21071	ATP-dependent phosphofructokinase	pfk	MBE2194645.1 ATP-dependent 6-phosphofructokinase [Anaerolinea sp.]	7.59e-281	770
MAPEBKBH_02541	Carbon	Glycolysis	K00850	6-phosphofructokinase 1	pfkA	CAG1013839.1 6-phosphofructokinase 1 [Anaerolineae bacterium]	1.43e-217	605
MAPEBKBH_02682	Carbon	Glycolysis	K00873	pyruvate kinase	pyk	MBE2193439.1 pyruvate kinase [Anaerolinea sp.]	0	981
MAPEBKBH_00225	Carbon	propionate production	K05606	methylmalonyl-CoA/ethylmalonyl-CoA epimerase	MCEE, epi	MBE2196942.1 VOC family protein [Anaerolinea sp.]	1.47e-109	318
MAPEBKBH_00241	Carbon	propionate production	K05606	methylmalonyl-CoA/ethylmalonyl-CoA epimerase	MCEE, epi	CAG0998812.1 methylmalonyl-CoA/ethylmalonyl-CoA epimerase [Planctomycetaceae bacterium]	2.98e-93	275
MAPEBKBH_00955	Carbon	propionate production	K01848	methylmalonyl-CoA mutase, N-terminal domain	mcmA1	MBE2192727.1 methylmalonyl-CoA mutase family protein [Anaerolinea sp.]	0	1108
MAPEBKBH_01005	Carbon	propionate production	K24012	acetate---CoA ligase (ADP-forming)	acdAB	MBE2193702.1 acetate--CoA ligase family protein [Anaerolinea sp.]	0	1341
MAPEBKBH_01240	Carbon	propionate production	K01966	propionyl-CoA carboxylase beta chain	pccB	MBE2195439.1 acyl-CoA carboxylase subunit beta [Anaerolinea sp.]	0	1043
MAPEBKBH_01352	Carbon	propionate production	K01966	propionyl-CoA carboxylase beta chain	pccB	CAG0971078.1 propionyl-CoA carboxylase beta chain [Anaerolineae bacterium]	0	1023
MAPEBKBH_02538	Carbon	propionate production	K01849	methylmalonyl-CoA mutase, C-terminal domain	mcmA2	MBE2192724.1 cobalamin B12-binding domain-containing protein [Anaerolinea sp.]	6.03e-88	262
MAPEBKBH_03628	Carbon	propionate production	K01848	methylmalonyl-CoA mutase, N-terminal domain	mcmA1	MBE2194552.1 methylmalonyl-CoA mutase family protein [Anaerolinea sp.]	0	1070
MAPEBKBH_01488	Nitrogen	Denitrification	K00368	nitrite reductase (NO-forming)	nirK	MBE2195582.1 nitrite reductase, copper-containing [Anaerolinea sp.]	0	1023
MAPEBKBH_03269	Nitrogen	Denitrification	K00376	nitrous-oxide reductase	nosZ	MBE7511510.1 Sec-dependent nitrous-oxide reductase [Anaerolineales bacterium]	0	1338
MAPEBKBH_03697	Nitrogen	DNRA	K03385	nitrite reductase (cytochrome c-552)	nrfA	MBE2195801.1 ammonia-forming cytochrome c nitrite reductase subunit c552 [Anaerolinea sp.]	1.90000000000005e-311	852
MAPEBKBH_03698	Nitrogen	DNRA	K15876	cytochrome c nitrite reductase small subunit	nrfH	MBE2195802.1 cytochrome c nitrite reductase small subunit [Anaerolinea sp.]	1.89e-123	354
MAPEBKBH_03714	Nitrogen	DNRA	K03385	nitrite reductase (cytochrome c-552)	nrfA	MBE2195801.1 ammonia-forming cytochrome c nitrite reductase subunit c552 [Anaerolinea sp.]	1.90000000000005e-311	852
MAPEBKBH_03715	Nitrogen	DNRA	K15876	cytochrome c nitrite reductase small subunit	nrfH	MBE2195802.1 cytochrome c nitrite reductase small subunit [Anaerolinea sp.]	1.89e-123	354
MAPEBKBH_03457	Nitrogen	Organic-N	K01430	urease subunit gamma	ureA	MBE2193124.1 urease subunit gamma [Anaerolinea sp.]	3.91e-62	194
MAPEBKBH_03458	Nitrogen	Organic-N	K01429	urease subunit beta	ureB	MBE2193125.1 urease subunit beta [Anaerolinea sp.]	9.24e-80	240
MAPEBKBH_03459	Nitrogen	Organic-N	K01428	urease subunit alpha	ureC	CAG1005315.1 urease subunit alpha [Anaerolineae bacterium]	0	1134
MAPEBKBH_00342	Oxygen	ROS defense	K04564	superoxide dismutase, Fe-Mn family	SOD2	CAG1008660.1 Superoxide dismutase [Mn] 2 [Anaerolineae bacterium]	2.03e-143	407
MAPEBKBH_00704	Oxygen	ROS defense	K03671	thioredoxin 1	trxA	CAG1015363.1 Thioredoxin 1 [Anaerolineae bacterium]	1.91e-164	464
MAPEBKBH_01093	Oxygen	ROS defense	K00384	thioredoxin reductase (NADPH)	trxB, TRR	MBE2193837.1 thioredoxin-disulfide reductase [Anaerolinea sp.]	3.56e-220	610
MAPEBKBH_01782	Oxygen	ROS defense	K03671	thioredoxin 1	trxA	CAG1001833.1 protein-disulfide reductase (glutathione) [Anaerolineae bacterium]	1.73e-94	280
MAPEBKBH_02117	Oxygen	ROS defense	K03671	thioredoxin 1	trxA	MBE2192976.1 thioredoxin family protein [Anaerolinea sp.]	1.61e-82	248
MAPEBKBH_02469	Oxygen	ROS defense	K03671	thioredoxin 1	trxA	MBE2196486.1 thioredoxin [Anaerolinea sp.]	1.96e-77	233
MAPEBKBH_04051	Oxygen	ROS defense	K03671	thioredoxin 1	trxA	WP_195171153.1 thioredoxin [Anaerolinea sp. 'rifampicinis']	1.21e-50	166
MAPEBKBH_01187	Oxygen	Terminal oxidase	K00425	cytochrome bd ubiquinol oxidase subunit I	cydA	MBE2194442.1 cytochrome ubiquinol oxidase subunit I [Anaerolinea sp.]	0	904
MAPEBKBH_04160	Oxygen	Terminal oxidase	K02274	cytochrome c oxidase subunit I	coxA, ctaD	MBE2194607.1 cytochrome c oxidase subunit I [Anaerolinea sp.]	0	1145
Extracellular carbohydrate-Active Enzyme
ORF	CAZy classes	evalue	bitscore	Activities
MAPEBKBH_02704	CBM3			Modules of approx. 150 residues found in bacterial enzymes. The cellulose-binding function has been demonstrated in many cases. In one instance binding to chitin has been reported.
MAPEBKBH_01013	CBM48			Modules of approx. 100 residues with glycogen-binding function, appended to GH13 modules. Also found in the beta subunit (glycogen-binding) of AMP-activated protein kinases (AMPK)
MAPEBKBH_01769	GH94			cellobiose phosphorylase (EC 2.4.1.20); laminaribiose phosphorylase (EC 2.4.1.31); cellodextrin phosphorylase (EC 2.4.1.49); chitobiose phosphorylase (EC 2.4.1.-); cyclic β-1,2-glucan synthase (EC 2.4.1.-); cellobionic acid phosphorylase (EC 2.4.1.321); β-1,2-oligoglucan phosphorylase (EC 2.4.1.-)
MAPEBKBH_01982	GH130			β-1,4-mannosylglucose phosphorylase (EC 2.4.1.281); β-1,4-mannooligosaccharide phosphorylase (EC 2.4.1.319); β-1,4-mannosyl-N-acetyl-glucosamine phosphorylase (EC 2.4.1.320); β-1,2-mannobiose phosphorylase (EC 2.4.1.-); β-1,2-oligomannan phosphorylase (EC 2.4.1.-); β-1,2-mannosidase (EC 3.2.1.-)
Extracellular peptidase
ORF	MEROPS Classification	evalue	bitscore	Catalytic type	MEROPS Name
MAPEBKBH_02069	S08.UPB			Serine	subfamily S8B unassigned peptidases
Transporter
ORF	TCID	evalue	bitscore	gene.product	Subfamily	Family	Fam_abbreviation	Superfamily	substrate
MAPEBKBH_00015	3.A.1.5.29	8.15e-141	402	gnl|TC-DB|Q9WXR3|3.A.1.5.29 Oligopeptide ABC transporter, ATP-binding protein OS=Thermotoga maritima (strain ATCC 43589 / MSB8 / DSM 3109 / JCM 10099) GN=TM_0057 PE=3 SV=1	3.A.1.5	3.A.1	ABC	ABC1, ABC2, ABC3 Superfamilies	CHEBI:37166;xylan
MAPEBKBH_00016	3.A.1.5.29	1.9e-120	349	gnl|TC-DB|Q9WXR4|3.A.1.5.29 Oligopeptide ABC transporter, ATP-binding protein OS=Thermotoga maritima (strain ATCC 43589 / MSB8 / DSM 3109 / JCM 10099) GN=TM_0058 PE=4 SV=1	3.A.1.5	3.A.1	ABC	ABC1, ABC2, ABC3 Superfamilies	CHEBI:37166;xylan
MAPEBKBH_00017	3.A.1.5.29	5.57e-115	339	gnl|TC-DB|Q9WXR5|3.A.1.5.29 ABC-type transporter, integral membrane subunit OS=Thermotoga maritima (strain ATCC 43589 / MSB8 / DSM 3109 / JCM 10099) GN=TM_0059 PE=3 SV=1	3.A.1.5	3.A.1	ABC	ABC1, ABC2, ABC3 Superfamilies	CHEBI:37166;xylan
MAPEBKBH_00019	3.A.1.5.12	1.4e-124	382	gnl|TC-DB|Q9X0F7|3.A.1.5.12 Oligopeptide ABC transporter, periplasmic oligopeptide-binding protein - Thermotoga maritima	3.A.1.5	3.A.1	ABC	ABC1, ABC2, ABC3 Superfamilies	CHEBI:26546;rhamnose
MAPEBKBH_00094	3.A.3.2.29	4.07e-226	667	gnl|TC-DB|D5C355|3.A.3.2.29 ATPase, P-type (Transporting), HAD superfamily, subfamily IC OS=Nitrosococcus halophilus (strain Nc4) GN=Nhal_1826 PE=3 SV=1	3.A.3.2	3.A.3	P-ATPase	P-type ATPase (P-ATPase) Superfamily	CHEBI:3308;calcium(2+)
MAPEBKBH_00247	3.A.3.2.21	1.9e-243	706	gnl|TC-DB|A9BJX0|3.A.3.2.21 Calcium-translocating P-type ATPase, PMCA-type OS=Petrotoga mobilis (strain DSM 10674 / SJ95) GN=Pmob_0991 PE=3 SV=1	3.A.3.2	3.A.3	P-ATPase	P-type ATPase (P-ATPase) Superfamily	CHEBI:3308;calcium(2+)
MAPEBKBH_00308	3.A.1.7.3	4.47e-105	305	gnl|TC-DB|C3KCB5|3.A.1.7.3 Putative ABC transporter ATP-binding protein OS=Pseudomonas fluorescens (strain SBW25) GN=PFLU_3315 PE=3 SV=1	3.A.1.7	3.A.1	ABC	ABC1, ABC2, ABC3 Superfamilies	CHEBI:7793;phosphate(3-)
MAPEBKBH_00314	3.A.1.11.10	2.3e-105	314	gnl|TC-DB|Q3MAR5|3.A.1.11.10 Spermidine/putrescine import ATP-binding protein PotA OS=Anabaena variabilis (strain ATCC 29413 / PCC 7937) OX=240292 GN=potA PE=3 SV=1	3.A.1.11	3.A.1	ABC	ABC1, ABC2, ABC3 Superfamilies	CHEBI:51349;polyamine macromolecule|CHEBI:10651;sym-homospermidine
MAPEBKBH_00393	3.A.7.16.1	1.9e-175	521	gnl|TC-DB|Q6MDD6|3.A.7.16.1 Putative exodeoxyribonuclease V OS=Protochlamydia amoebophila (strain UWE25) GN=recD PE=4 SV=1	NA	NA	NA	NA	CHEBI:14911;protein|CHEBI:4291;deoxyribonucleic acid
MAPEBKBH_00432	3.A.2.1.14	6.87e-207	582	gnl|TC-DB|P09219|3.A.2.1.14 ATP synthase subunit alpha OS=Bacillus sp. (strain PS3) OX=2334 GN=atpA PE=1 SV=1	NA	NA	NA	NA	CHEBI:5584;hydron
MAPEBKBH_00434	3.A.2.1.14	2.24e-205	576	gnl|TC-DB|P07677|3.A.2.1.14 ATP synthase subunit beta OS=Bacillus sp. (strain PS3) OX=2334 GN=atpD PE=1 SV=1	NA	NA	NA	NA	CHEBI:5584;hydron
MAPEBKBH_00489	3.D.9.1.2	2.84e-136	405	gnl|TC-DB|OLS18213|3.D.9.1.2 Formate hydrogenlyase subunit 5 precursor [Candidatus Odinarchaeota archaeon LCB_4]	3.D.9.1	3.D.9	F420H2DH	Iron-Sulfur Protein (ISP) Superfamily	CHEBI:24636;proton
MAPEBKBH_00495	3.A.1.1.22	7.04e-150	427	gnl|TC-DB|Q9X103|3.A.1.1.22 Sugar ABC transporter, ATP-binding protein - Thermotoga maritima.	3.A.1.1	3.A.1	ABC	ABC1, ABC2, ABC3 Superfamilies	CHEBI:10202;alpha,alpha-trehalose|CHEBI:6668;maltose|CHEBI:6672;alpha-maltotriose|CHEBI:6671;maltotetraose
MAPEBKBH_00514	3.A.1.103.5	1.59e-101	308	gnl|TC-DB|P72884|3.A.1.103.5 ABC transporter OS=Synechocystis sp. (strain PCC 6803 / Kazusa) GN=rfbB PE=4 SV=1	3.A.1.103	3.A.1	ABC	ABC1, ABC2, ABC3 Superfamilies	CHEBI:4879;ethanol|CHEBI:23008;carbohydrate
MAPEBKBH_00540	3.A.11.1.5	1.08e-101	328	gnl|TC-DB|AKM80781.1|3.A.11.1.5 hypothetical protein UW38_C0001G0951 [Candidatus Saccharibacteria bacterium GW2011_GWC2_44_17]	NA	NA	NA	NA	NA
MAPEBKBH_00617	3.A.23.6.1	2.79e-112	328	gnl|TC-DB|B3ET62|3.A.23.6.1 Glyceraldehyde-3-phosphate dehydrogenase OS=Amoebophilus asiaticus (strain 5a2) GN=Aasi_1069 PE=3 SV=1	3.A.23.6	3.A.23	T6SS	ATP-dependent Clp Protease (Clp) Superfamily	NA
MAPEBKBH_00636	3.A.9.1.2	8.32e-108	349	gnl|TC-DB|Q9FI56|3.A.9.1.2 Chaperone protein ClpC1, chloroplastic OS=Arabidopsis thaliana GN=CLPC1 PE=1 SV=1	3.A.9.1	3.A.9	CEPT or Tic-Toc	ATP-dependent Clp Protease (Clp) Superfamily	CHEBI:8526;protein polypeptide chain
MAPEBKBH_00662	9.B.18.2.1	7.96e-107	335	gnl|TC-DB|Q6MMD5|9.B.18.2.1 Nucleotide sugar epimerase/dehydratase OS=Bdellovibrio bacteriovorus (strain ATCC 15356 / DSM 50701 / NCIB 9529 / HD100) GN=wbpM PE=4 SV=1	NA	NA	NA	NA	NA
MAPEBKBH_00755	3.A.11.1.5	1.73e-154	470	gnl|TC-DB|AKM80112|3.A.11.1.5 putative ATP-dependent DNA helicase [Candidatus Saccharibacteria bacterium GW2011_GWC2_44_17]	NA	NA	NA	NA	NA
MAPEBKBH_00764	3.D.1.3.1	5.92e-137	399	gnl|TC-DB|Q56222|3.D.1.3.1 NADH-quinone oxidoreductase chain 1 (EC 1.6.99.5) (NADH dehydrogenase I, chain 1) (NDH-1, chain 1) - Thermus thermophilus.	3.D.1.3	3.D.1	NDH	Iron-Sulfur Protein (ISP) Superfamily	CHEBI:5584;hydron
MAPEBKBH_00831	3.A.3.5.18	2.69e-228	658	gnl|TC-DB|O32220|3.A.3.5.18 Copper-transporting P-type ATPase copA - Bacillus subtilis.	3.A.3.5	3.A.3	P-ATPase	P-type ATPase (P-ATPase) Superfamily	CHEBI:49551;copper(1+)
MAPEBKBH_00858	1.A.13.3.1	6.25e-145	453	gnl|TC-DB|A9WIT9|1.A.13.3.1 von Willebrand factor type A OS=Chloroflexus aurantiacus (strain ATCC 29366 / DSM 635 / J-10-fl) GN=Caur_2610 PE=4 SV=1	NA	NA	NA	NA	NA
MAPEBKBH_00918	3.A.1.125.2	4.31e-208	612	gnl|TC-DB|Q7D911|3.A.1.125.2 Putative uncharacterized protein - Mycobacterium tuberculosis.	3.A.1.125	3.A.1	ABC	ABC1, ABC2, ABC3 Superfamilies	NA
MAPEBKBH_00923	3.A.1.15.8	2.36e-108	313	gnl|TC-DB|P96117|3.A.1.15.8 Zinc transport system ATP-binding protein troB - Treponema pallidum.	3.A.1.15	3.A.1	ABC	ABC1, ABC2, ABC3 Superfamilies	CHEBI:34754;iron(2+)|CHEBI:29035;manganese(2+)|CHEBI:10113;zinc(2+)
MAPEBKBH_00929	1.A.33.1.4	2.95e-125	380	gnl|TC-DB|G4NXA5|1.A.33.1.4 Chaperone protein DnaK OS=Bacillus subtilis subsp. spizizenii TU-B-10 GN=dnaK PE=3 SV=1	NA	NA	NA	NA	NA
MAPEBKBH_01032	3.A.1.135.10	2.43e-119	367	gnl|TC-DB|A4XGX1|3.A.1.135.10 ABC transporter related protein OS=Caldicellulosiruptor saccharolyticus (strain ATCC 43494 / DSM 8903 / Tp8T 6331) OX=351627 GN=Csac_0522 PE=4 SV=1	3.A.1.135	3.A.1	ABC	ABC1, ABC2, ABC3 Superfamilies	NA
MAPEBKBH_01033	3.A.1.106.17	8.57e-108	336	gnl|TC-DB|C1F8I9|3.A.1.106.17 Efflux ABC transporter, permease/ATP-binding protein OS=Acidobacterium capsulatum (strain ATCC 51196 / DSM 11244 / JCM 7670 / NBRC 15755 / NCIMB 13165 / 161) OX=240015 GN=ACP_0113 PE=4 SV=1	3.A.1.106	3.A.1	ABC	ABC1, ABC2, ABC3 Superfamilies	NA
MAPEBKBH_01048	2.A.5.5.10	3.6e-105	305	gnl|TC-DB|Q72FY4|2.A.5.5.10 ZIP zinc transporter family protein OS=Desulfovibrio vulgaris (strain ATCC 29579 / DSM 644 / NCIMB 8303 / VKM B-1760 / Hildenborough) OX=882 GN=DVU_0079 PE=4 SV=1	NA	NA	NA	NA	CHEBI:29033;iron(2+)|CHEBI:49972;zinc(2+)
MAPEBKBH_01082	3.A.1.13.2	7.88e-138	400	gnl|TC-DB|A9WCZ4|3.A.1.13.2 Periplasmic binding protein OS=Chloroflexus aurantiacus (strain ATCC 29366 / DSM 635 / J-10-fl) GN=Caur_0312 PE=4 SV=1	3.A.1.13	3.A.1	ABC	ABC1, ABC2, ABC3 Superfamilies	CHEBI:30411;cobalamin
MAPEBKBH_01083	3.A.1.13.2	8.37e-121	352	gnl|TC-DB|A9WCZ6|3.A.1.13.2 Transport system permease protein OS=Chloroflexus aurantiacus (strain ATCC 29366 / DSM 635 / J-10-fl) GN=Caur_0314 PE=3 SV=1	3.A.1.13	3.A.1	ABC	ABC1, ABC2, ABC3 Superfamilies	CHEBI:30411;cobalamin
MAPEBKBH_01084	3.A.1.13.2	7.3e-109	321	gnl|TC-DB|A9WCZ7|3.A.1.13.2 ABC transporter related OS=Chloroflexus aurantiacus (strain ATCC 29366 / DSM 635 / J-10-fl) GN=Caur_0315 PE=4 SV=1	3.A.1.13	3.A.1	ABC	ABC1, ABC2, ABC3 Superfamilies	CHEBI:30411;cobalamin
MAPEBKBH_01187	3.D.4.3.2	4.69e-105	322	gnl|TC-DB|P0ABJ9|3.D.4.3.2 Cytochrome d ubiquinol oxidase subunit 1 OS=Escherichia coli (strain K12) GN=cydA PE=1 SV=1	NA	NA	NA	NA	CHEBI:5584;hydron
MAPEBKBH_01233	3.A.1.5.37	2e-122	354	gnl|TC-DB|B1W1L9|3.A.1.5.37 Putative peptide ABC transporter ATP-binding protein OS=Streptomyces griseus subsp. griseus (strain JCM 4626 / NBRC 13350) GN=SGR_2415 PE=3 SV=1	3.A.1.5	3.A.1	ABC	ABC1, ABC2, ABC3 Superfamilies	CHEBI:7755;oligopeptide
MAPEBKBH_01234	3.A.1.5.20	3.73e-145	412	gnl|TC-DB|P42065|3.A.1.5.20 Oligopeptide transport ATP-binding protein appF - Bacillus subtilis.	3.A.1.5	3.A.1	ABC	ABC1, ABC2, ABC3 Superfamilies	CHEBI:7755;oligopeptide
MAPEBKBH_01240	3.B.1.1.5	1.86e-219	615	gnl|TC-DB|Q9V0A4|3.B.1.1.5 Methylmalonyl-CoA decarboxylase, subunit A LPHA (MMDA) - Pyrococcus abyssi.	3.B.1.1	3.B.1	NaT-DC	CPA Superfamily	CHEBI:9175;sodium(1+)
MAPEBKBH_01289	9.B.157.1.4	3.28e-113	331	gnl|TC-DB|Q8F2L2|9.B.157.1.4 Actin-like ATPase involved in cell morphogenesis OS=Leptospira interrogans serogroup Icterohaemorrhagiae serovar Lai (strain 56601) OX=189518 GN=mreB PE=4 SV=1	NA	NA	NA	NA	NA
MAPEBKBH_01348	9.B.142.2.20	3.69e-104	320	gnl|TC-DB|MBL7095498.1|9.B.142.2.20 glycosyltransferase family 39 protein [candidate division KSB1 bacterium]	9.B.142.2	9.B.142	GT39	Glycosyl/Acyl Transferase (GAT) Superfamily	NA
MAPEBKBH_01352	3.B.1.1.5	1.16e-215	606	gnl|TC-DB|Q9V0A4|3.B.1.1.5 Methylmalonyl-CoA decarboxylase, subunit A LPHA (MMDA) - Pyrococcus abyssi.	3.B.1.1	3.B.1	NaT-DC	CPA Superfamily	CHEBI:9175;sodium(1+)
MAPEBKBH_01355	3.B.1.1.5	1.23e-122	359	gnl|TC-DB|Q9V0A7|3.B.1.1.5 Methylmalonyl-CoA decarboxylase, beta subunit - Pyrococcus abyssi.	3.B.1.1	3.B.1	NaT-DC	CPA Superfamily	CHEBI:9175;sodium(1+)
MAPEBKBH_01426	3.A.3.7.1	0	894	gnl|TC-DB|P03960|3.A.3.7.1 Potassium-transporting ATPase B chain (EC 3.6.3.12) (Potassium- translocating ATPase B chain) (ATP phosphohydrolase [potassium- transporting] B chain) (Potassium binding and translocating subunit B) - Escherichia coli.	3.A.3.7	3.A.3	P-ATPase	P-type ATPase (P-ATPase) Superfamily	CHEBI:8345;potassium(1+)
MAPEBKBH_01427	3.A.3.7.2	4.64e-208	591	gnl|TC-DB|Q1M605|3.A.3.7.2 Potassium-transporting ATPase A chain OS=Rhizobium leguminosarum bv. viciae (strain 3841) GN=kdpA PE=3 SV=1	3.A.3.7	3.A.3	P-ATPase	P-type ATPase (P-ATPase) Superfamily	CHEBI:26216;potassium atom
MAPEBKBH_01522	3.D.1.3.1	3.49e-113	355	gnl|TC-DB|Q56227|3.D.1.3.1 NADH-quinone oxidoreductase chain 12 (EC 1.6.99.5) (NADH dehydrogenase I, chain 12) (NDH-1, chain 12) - Thermus thermophilus.	3.D.1.3	3.D.1	NDH	Iron-Sulfur Protein (ISP) Superfamily	CHEBI:5584;hydron
MAPEBKBH_01523	3.D.1.2.1	5.55e-123	370	gnl|TC-DB|P29925|3.D.1.2.1 NADH-ubiquinone oxidoreductase chain 13 (EC 1.6.5.3) (NADH dehydrogenase 1, chain 13) (NDH-1, chain 13) - Paracoccus denitrificans.	3.D.1.2	3.D.1	NDH	Iron-Sulfur Protein (ISP) Superfamily	CHEBI:5584;hydron
MAPEBKBH_01688	9.A.47.2.1	6.32e-135	397	gnl|TC-DB|Q7UHP7|9.A.47.2.1 Putative secretory protein OS=Rhodopirellula baltica (strain SH1) GN=RB13073 PE=4 SV=1	NA	NA	NA	NA	CHEBI:8526;protein polypeptide chain
MAPEBKBH_01754	2.A.63.1.1	2.68e-127	409	gnl|TC-DB|Q52978|2.A.63.1.1 PhaA protein - Rhizobium meliloti (Sinorhizobium meliloti).	2.A.63.1	2.A.63	CPA3	Na+ Transporting Mrp (Mrp) Superfamily	CHEBI:9175;sodium(1+)|CHEBI:8345;potassium(1+)|CHEBI:5584;hydron
MAPEBKBH_01807	3.A.5.1.1	4.08e-263	759	gnl|TC-DB|P10408|3.A.5.1.1 PREPROTEIN TRANSLOCASE SECA SUBUNIT - Escherichia coli.	3.A.5.1	3.A.5	Sec	Ankyrin Repeat Domain-containing (Ank) Superfamily	CHEBI:8526;protein polypeptide chain
MAPEBKBH_01843	3.A.1.2.12	1.29e-154	449	gnl|TC-DB|Q8DU37|3.A.1.2.12 Putative sugar ABC transporter, ATP-binding protein - Streptococcus mutans.	3.A.1.2	3.A.1	ABC	ABC1, ABC2, ABC3 Superfamilies	CHEBI:23636;deoxyribonucleoside
MAPEBKBH_01859	3.A.1.1.32	6.57e-105	310	gnl|TC-DB|Q55473|3.A.1.1.32 Membrane bound sugar transport protein OS=Synechocystis sp. (strain PCC 6803) GN=slr0531 PE=3 SV=1	3.A.1.1	3.A.1	ABC	ABC1, ABC2, ABC3 Superfamilies	CHEBI:91033;1-O-(D-glucosyl)glycerol
MAPEBKBH_01861	3.A.1.1.32	4.11e-107	323	gnl|TC-DB|Q55471|3.A.1.1.32 Slr0529 protein OS=Synechocystis sp. (strain PCC 6803) GN=slr0529 PE=4 SV=1	3.A.1.1	3.A.1	ABC	ABC1, ABC2, ABC3 Superfamilies	CHEBI:91033;1-O-(D-glucosyl)glycerol
MAPEBKBH_01870	3.A.1.106.9	2.28e-176	514	gnl|TC-DB|Q9KZE5|3.A.1.106.9 Putative ABC-transport protein OS=Streptomyces coelicolor (strain ATCC BAA-471 / A3(2) / M145) GN=ecaA PE=4 SV=1	3.A.1.106	3.A.1	ABC	ABC1, ABC2, ABC3 Superfamilies	CHEBI:2448;actinorhodin
MAPEBKBH_01886	3.A.12.1.1	1.25e-117	377	gnl|TC-DB|P21458|3.A.12.1.1 Stage III sporulation protein E - Bacillus subtilis.	NA	NA	NA	NA	CHEBI:4291;deoxyribonucleic acid
MAPEBKBH_01960	3.A.9.1.2	4.9e-294	834	gnl|TC-DB|Q9FI56|3.A.9.1.2 Chaperone protein ClpC1, chloroplastic OS=Arabidopsis thaliana GN=CLPC1 PE=1 SV=1	3.A.9.1	3.A.9	CEPT or Tic-Toc	ATP-dependent Clp Protease (Clp) Superfamily	CHEBI:8526;protein polypeptide chain
MAPEBKBH_01996	3.A.1.105.9	5.48e-101	299	gnl|TC-DB|J8ABC0|3.A.1.105.9 Uncharacterized protein OS=Bacillus cereus BAG4X12-1 GN=IE9_00061 PE=3 SV=1	3.A.1.105	3.A.1	ABC	ABC1, ABC2, ABC3 Superfamilies	NA
MAPEBKBH_02020	3.A.1.17.13	1.67e-108	319	gnl|TC-DB|A9WDR9|3.A.1.17.13 NMT1/THI5 like domain protein OS=Chloroflexus aurantiacus (strain ATCC 29366 / DSM 635 / J-10-fl) GN=Caur_0425 PE=4 SV=1	3.A.1.17	3.A.1	ABC	ABC1, ABC2, ABC3 Superfamilies	CHEBI:8843;riboflavin
MAPEBKBH_02046	3.A.1.135.10	9.9e-129	390	gnl|TC-DB|A4XGX0|3.A.1.135.10 ABC transporter related protein OS=Caldicellulosiruptor saccharolyticus (strain ATCC 43494 / DSM 8903 / Tp8T 6331) OX=351627 GN=Csac_0521 PE=4 SV=1	3.A.1.135	3.A.1	ABC	ABC1, ABC2, ABC3 Superfamilies	NA
MAPEBKBH_02047	3.A.1.135.10	3.7e-142	428	gnl|TC-DB|A4XGX1|3.A.1.135.10 ABC transporter related protein OS=Caldicellulosiruptor saccharolyticus (strain ATCC 43494 / DSM 8903 / Tp8T 6331) OX=351627 GN=Csac_0522 PE=4 SV=1	3.A.1.135	3.A.1	ABC	ABC1, ABC2, ABC3 Superfamilies	NA
MAPEBKBH_02196	8.A.9.1.2	3.69e-112	348	gnl|TC-DB|Q07837|8.A.9.1.2 Neutral and basic amino acid transport protein rBAT OS=Homo sapiens GN=SLC3A1 PE=1 SV=2	NA	NA	NA	NA	NA
MAPEBKBH_02214	3.A.1.120.7	3.82e-110	341	gnl|TC-DB|AGN74890.1|3.A.1.120.7 ABC transporter [Streptomyces griseoviridis]	3.A.1.120	3.A.1	ABC	ABC1, ABC2, ABC3 Superfamilies	NA
MAPEBKBH_02251	3.A.1.135.10	3.67e-119	366	gnl|TC-DB|A4XGX1|3.A.1.135.10 ABC transporter related protein OS=Caldicellulosiruptor saccharolyticus (strain ATCC 43494 / DSM 8903 / Tp8T 6331) OX=351627 GN=Csac_0522 PE=4 SV=1	3.A.1.135	3.A.1	ABC	ABC1, ABC2, ABC3 Superfamilies	NA
MAPEBKBH_02252	2.A.3.14.1	2e-116	363	gnl|TC-DB|A4X503|2.A.3.14.1 Putative uncharacterized protein OS=Salinispora tropica (strain ATCC BAA-916 / DSM 44818 / CNB-440) GN=Strop_1487 PE=4 SV=1	2.A.3.14	2.A.3	APC	APC Superfamily	NA
MAPEBKBH_02280	3.D.7.2.4	3.48e-103	315	gnl|TC-DB|P60227|3.D.7.2.4 F420-non-reducing hydrogenase subunit A OS=Methanothermobacter marburgensis (strain ATCC BAA-927 / DSM 2133 / JCM 14651 / NBRC 100331 / OCM 82 / Marburg) OX=79929 GN=mvhA PE=1 SV=2	3.D.7.2	3.D.7	HHO	Iron-Sulfur Protein (ISP) Superfamily	NA
MAPEBKBH_02283	3.D.1.5.1	4.3e-193	553	gnl|TC-DB|Q74GA3|3.D.1.5.1 NADH dehydrogenase I, F subunit - Geobacter sulfurreducens.	3.D.1.5	3.D.1	NDH	Iron-Sulfur Protein (ISP) Superfamily	CHEBI:5584;hydron
MAPEBKBH_02302	3.A.1.135.13	2.19e-190	549	gnl|TC-DB|Q66LJ0|3.A.1.135.13 Netropsin resistance protein subunit 2 OS=Streptomyces netropsis OX=55404 GN=netP2 PE=4 SV=1	3.A.1.135	3.A.1	ABC	ABC1, ABC2, ABC3 Superfamilies	CHEBI:22582;antimicrobial agent
MAPEBKBH_02304	3.A.1.135.12	5.41e-152	451	gnl|TC-DB|KKK43437|3.A.1.135.12 putative multidrug export ATP-binding/permease protein [Lokiarchaeum sp. GC14_75]	3.A.1.135	3.A.1	ABC	ABC1, ABC2, ABC3 Superfamilies	NA
MAPEBKBH_02320	3.A.1.148.4	6.32e-104	304	gnl|TC-DB|D2BBE3|3.A.1.148.4 ABC transporter related protein OS=Streptosporangium roseum (strain ATCC 12428 / DSM 43021 / JCM 3005 / NI 9100) GN=Sros_1168 PE=3 SV=1	3.A.1.148	3.A.1	ABC	ABC1, ABC2, ABC3 Superfamilies	NA
MAPEBKBH_02341	3.A.9.1.2	1.72e-186	558	gnl|TC-DB|Q9SXJ7|3.A.9.1.2 Chaperone protein ClpC2, chloroplastic OS=Arabidopsis thaliana GN=CLPC2 PE=2 SV=1	3.A.9.1	3.A.9	CEPT or Tic-Toc	ATP-dependent Clp Protease (Clp) Superfamily	CHEBI:8526;protein polypeptide chain
MAPEBKBH_02349	3.A.9.1.1	1.42e-240	681	gnl|TC-DB|Q02028|3.A.9.1.1 Stromal 70 kDa heat shock-related protein, chloroplast precursor - Pisum sativum (Garden pea).	3.A.9.1	3.A.9	CEPT or Tic-Toc	ATP-dependent Clp Protease (Clp) Superfamily	CHEBI:8526;protein polypeptide chain
MAPEBKBH_02439	3.D.1.8.2	7.42e-119	373	gnl|TC-DB|Q8DKX9|3.D.1.8.2 NADH dehydrogenase subunit 5 OS=Thermosynechococcus elongatus (strain BP-1) OX=197221 GN=ndhF1 PE=1 SV=1	3.D.1.8	3.D.1	NDH	Iron-Sulfur Protein (ISP) Superfamily	CHEBI:24636;proton
MAPEBKBH_02464	3.A.9.1.2	7.53e-270	771	gnl|TC-DB|Q9FI56|3.A.9.1.2 Chaperone protein ClpC1, chloroplastic OS=Arabidopsis thaliana GN=CLPC1 PE=1 SV=1	3.A.9.1	3.A.9	CEPT or Tic-Toc	ATP-dependent Clp Protease (Clp) Superfamily	CHEBI:8526;protein polypeptide chain
MAPEBKBH_02501	9.A.8.1.14	9.46e-171	505	gnl|TC-DB|B1R5B7|9.A.8.1.14 Ferrous iron transport protein B OS=Clostridium perfringens B str. ATCC 3626 GN=feoB PE=3 SV=1	NA	NA	NA	NA	CHEBI:34754;iron(2+)
MAPEBKBH_02545	4.C.1.1.4	1.02e-113	349	gnl|TC-DB|P69451|4.C.1.1.4 Long-chain-fatty-acid--CoA ligase - Escherichia coli.	NA	NA	NA	NA	CHEBI:4984;fatty acid
MAPEBKBH_02557	3.A.5.2.2	1.76e-131	389	gnl|TC-DB|P66844|3.A.5.2.2 Signal recognition particle protein OS=Mycobacterium tuberculosis GN=ffh PE=3 SV=1	3.A.5.2	3.A.5	Sec	Ankyrin Repeat Domain-containing (Ank) Superfamily	CHEBI:8526;protein polypeptide chain
MAPEBKBH_02592	3.A.1.2.17	1.93e-123	379	gnl|TC-DB|A2RKA7|3.A.1.2.17 Purine/cytidine ABC transporter ATP-binding protein OS=Lactococcus lactis subsp. cremoris (strain MG1363) GN=nupA PE=4 SV=1	3.A.1.2	3.A.1	ABC	ABC1, ABC2, ABC3 Superfamilies	CHEBI:7647;nucleoside
MAPEBKBH_02650	3.A.3.23.3	3.4e-233	675	gnl|TC-DB|Q10YH7|3.A.3.23.3 ATPase, P-type (Transporting), HAD superfamily, subfamily IC OS=Trichodesmium erythraeum (strain IMS101) GN=Tery_3629 PE=3 SV=1	3.A.3.23	3.A.3	P-ATPase	P-type ATPase (P-ATPase) Superfamily	CHEBI:3473;cation
MAPEBKBH_02754	3.A.3.6.1	5.97e-171	507	gnl|TC-DB|P20021|3.A.3.6.1 PROBABLE CADMIUM-TRANSPORTING ATPASE (EC 3.6.3.3) (CADMIUM EFFLUX ATPASE) - Staphylococcus aureus.	3.A.3.6	3.A.3	P-ATPase	P-type ATPase (P-ATPase) Superfamily	CHEBI:3290;cadmium(2+)|CHEBI:49807;lead(2+)|CHEBI:10113;zinc(2+)|CHEBI:5584;hydron
MAPEBKBH_02766	3.A.10.2.2	2.22e-180	538	gnl|TC-DB|Q6BCL0|3.A.10.2.2 H+-pyrophosphatase - Streptomyces coelicolor.	NA	NA	NA	NA	CHEBI:5584;hydron
MAPEBKBH_02886	3.A.3.6.21	1.59e-169	499	gnl|TC-DB|Q59997|3.A.3.6.21 Cation-transporting ATPase; E1-E2 ATPase OS=Synechocystis sp. (strain PCC 6803 / Kazusa) GN=slr0797 PE=3 SV=1	3.A.3.6	3.A.3	P-ATPase	P-type ATPase (P-ATPase) Superfamily	CHEBI:23337;cobalt(2+)
MAPEBKBH_02913	3.A.1.144.4	5.64e-107	313	gnl|TC-DB|E1IBA4|3.A.1.144.4 ABC transporter related protein OS=Oscillochloris trichoides DG-6 GN=OSCT_0605 PE=3 SV=1	3.A.1.144	3.A.1	ABC	ABC1, ABC2, ABC3 Superfamilies	NA
MAPEBKBH_03010	3.A.1.103.5	1.02e-102	311	gnl|TC-DB|P72884|3.A.1.103.5 ABC transporter OS=Synechocystis sp. (strain PCC 6803 / Kazusa) GN=rfbB PE=4 SV=1	3.A.1.103	3.A.1	ABC	ABC1, ABC2, ABC3 Superfamilies	CHEBI:4879;ethanol|CHEBI:23008;carbohydrate
MAPEBKBH_03054	8.A.163.1.1	2.18e-124	383	gnl|TC-DB|P08238|8.A.163.1.1 Heat shock protein HSP 90-beta OS=Homo sapiens OX=9606 GN=HSP90AB1 PE=1 SV=4	NA	NA	NA	NA	CHEBI:14911;protein
MAPEBKBH_03142	3.A.3.23.1	1.99e-110	356	gnl|TC-DB|Q9KXM5|3.A.3.23.1 Cation-transporting ATPase - Streptomyces coelicolor.	3.A.3.23	3.A.3	P-ATPase	P-type ATPase (P-ATPase) Superfamily	CHEBI:3473;cation
MAPEBKBH_03144	3.A.29.1.5	6.41e-191	553	gnl|TC-DB|P0AAI3|3.A.29.1.5 ATP-dependent zinc metalloprotease FtsH OS=Escherichia coli (strain K12) OX=83333 GN=ftsH PE=1 SV=1	3.A.29.1	3.A.29	MIMP	AAA-ATPase Superfamily	NA
MAPEBKBH_03202	3.A.10.2.2	3.18e-167	501	gnl|TC-DB|Q6BCL0|3.A.10.2.2 H+-pyrophosphatase - Streptomyces coelicolor.	NA	NA	NA	NA	CHEBI:5584;hydron
MAPEBKBH_03375	3.A.1.2.14	1.59e-111	325	gnl|TC-DB|Q0HIQ8|3.A.1.2.14 Periplasmic binding protein/LacI transcriptional regulator OS=Shewanella sp. (strain MR-4) GN=Shewmr4_1986 PE=3 SV=1	3.A.1.2	3.A.1	ABC	ABC1, ABC2, ABC3 Superfamilies	CHEBI:22599;arabinose
MAPEBKBH_03376	3.A.1.2.25	1.96e-190	540	gnl|TC-DB|Q6BEX0|3.A.1.2.25 Uncharacterized ABC transporter ATP-binding protein YtfR OS=Escherichia coli (strain K12) GN=ytfR PE=3 SV=1	3.A.1.2	3.A.1	ABC	ABC1, ABC2, ABC3 Superfamilies	CHEBI:9840;UDP-sugar
MAPEBKBH_03378	3.A.1.2.14	6.07e-110	322	gnl|TC-DB|Q0HIQ5|3.A.1.2.14 Inner-membrane translocator OS=Shewanella sp. (strain MR-4) GN=Shewmr4_1989 PE=3 SV=1	3.A.1.2	3.A.1	ABC	ABC1, ABC2, ABC3 Superfamilies	CHEBI:22599;arabinose
MAPEBKBH_03418	8.A.5.1.6	2.11e-127	366	gnl|TC-DB|P77735|8.A.5.1.6 Uncharacterized oxidoreductase YajO OS=Escherichia coli (strain K12) GN=yajO PE=3 SV=2	NA	NA	NA	NA	NA
MAPEBKBH_03430	3.A.1.17.9	3.47e-137	415	gnl|TC-DB|R7QS55|3.A.1.17.9 Stackhouse genomic scaffold, scaffold_628 OS=Chondrus crispus GN=CHC_T00000780001 PE=3 SV=1	3.A.1.17	3.A.1	ABC	ABC1, ABC2, ABC3 Superfamilies	NA
MAPEBKBH_03439	3.D.1.2.1	5.5e-110	337	gnl|TC-DB|P29925|3.D.1.2.1 NADH-ubiquinone oxidoreductase chain 13 (EC 1.6.5.3) (NADH dehydrogenase 1, chain 13) (NDH-1, chain 13) - Paracoccus denitrificans.	3.D.1.2	3.D.1	NDH	Iron-Sulfur Protein (ISP) Superfamily	CHEBI:5584;hydron
MAPEBKBH_03451	3.A.1.4.5	7.32e-165	469	gnl|TC-DB|Q8NRW1|3.A.1.4.5 UrtB - Corynebacterium glutamicum.	3.A.1.4	3.A.1	ABC	ABC1, ABC2, ABC3 Superfamilies	CHEBI:9888;urea|CHEBI:5816;hydroxyurea|CHEBI:29331;thiourea
MAPEBKBH_03469	3.D.10.1.9	9.31e-229	644	gnl|TC-DB|I7FYK4|3.D.10.1.9 Succinate dehydrogenase flavoprotein subunit OS=Mycolicibacterium smegmatis (strain ATCC 700084 / mc(2)155) OX=246196 GN=sdhA PE=3 SV=1	3.D.10.1	3.D.10	SDH	Iron-Sulfur Protein (ISP) Superfamily	CHEBI:24636;proton|CHEBI:30031;succinate(2-)|CHEBI:29806;fumarate(2-)|CHEBI:10545;electron
MAPEBKBH_03490	3.A.1.3.8	4.41e-123	350	gnl|TC-DB|Q52815|3.A.1.3.8 General L-amino acid transport ATP-binding protein aapP - Rhizobium leguminosarum (biovar viciae).	3.A.1.3	3.A.1	ABC	ABC1, ABC2, ABC3 Superfamilies	CHEBI:2642;alpha-amino acid
MAPEBKBH_03556	3.A.1.2.32	4.28e-171	492	gnl|TC-DB|B3EYM1|3.A.1.2.32 L-arabinose transport ATP-binding protein OS=Geobacillus stearothermophilus OX=1422 GN=araG PE=4 SV=1	3.A.1.2	3.A.1	ABC	ABC1, ABC2, ABC3 Superfamilies	CHEBI:22599;arabinose
MAPEBKBH_03560	3.A.3.2.21	7.16e-232	676	gnl|TC-DB|A9BJX0|3.A.3.2.21 Calcium-translocating P-type ATPase, PMCA-type OS=Petrotoga mobilis (strain DSM 10674 / SJ95) GN=Pmob_0991 PE=3 SV=1	3.A.3.2	3.A.3	P-ATPase	P-type ATPase (P-ATPase) Superfamily	CHEBI:3308;calcium(2+)
MAPEBKBH_03649	9.B.157.1.1	1.18e-114	335	gnl|TC-DB|Q01465|9.B.157.1.1 Rod shape-determining protein MreB OS=Bacillus subtilis (strain 168) GN=mreB PE=3 SV=3	NA	NA	NA	NA	CHEBI:5140;folic acid
MAPEBKBH_03786	3.A.1.106.3	5.52e-121	371	gnl|TC-DB|Q8G7R7|3.A.1.106.3 Probable permease protein of ABC transporter system OS=Bifidobacterium longum GN=BL0180 PE=3 SV=1	3.A.1.106	3.A.1	ABC	ABC1, ABC2, ABC3 Superfamilies	CHEBI:59062;polymyxin|CHEBI:135075;alphaprodine
MAPEBKBH_03787	3.A.1.135.10	5.97e-128	388	gnl|TC-DB|A4XGX0|3.A.1.135.10 ABC transporter related protein OS=Caldicellulosiruptor saccharolyticus (strain ATCC 43494 / DSM 8903 / Tp8T 6331) OX=351627 GN=Csac_0521 PE=4 SV=1	3.A.1.135	3.A.1	ABC	ABC1, ABC2, ABC3 Superfamilies	NA
MAPEBKBH_03857	4.D.1.1.14	1.02e-101	301	gnl|TC-DB|Q55487|4.D.1.1.14 Uncharacterized glycosyltransferase sll0501 OS=Synechocystis sp. (strain PCC 6803 / Kazusa) GN=sll0501 PE=3 SV=1	4.D.1.1	4.D.1	VGP	Glycosyl Transferase/Transporter (GTT) Superfamily	NA
MAPEBKBH_03865	2.A.37.1.5	2.73e-128	390	gnl|TC-DB|P39830|2.A.37.1.5 Inner membrane protein ybaL OS=Escherichia coli (strain K12) GN=ybaL PE=1 SV=2	2.A.37.1	2.A.37	CPA2	CPA Superfamily	NA
MAPEBKBH_04160	3.D.4.4.4	1.13e-217	614	gnl|TC-DB|Q8DHE9|3.D.4.4.4 Cytochrome c oxidase subunit 1 OS=Thermosynechococcus elongatus (strain BP-1) GN=ctaD PE=3 SV=1	NA	NA	NA	NA	CHEBI:5584;hydron
MAPEBKBH_04320	3.A.1.106.18	4.66e-122	373	gnl|TC-DB|Q72J05|3.A.1.106.18 Multidrug resistance ABC transporter ATP-binding and permease protein OS=Thermus thermophilus (strain HB27 / ATCC BAA-163 / DSM 7039) OX=262724 GN=TT_C0976 PE=1 SV=1	3.A.1.106	3.A.1	ABC	ABC1, ABC2, ABC3 Superfamilies	CHEBI:5742;2'-(4-ethoxyphenyl)-5-(4-methylpiperazin-1-yl)-2,5'-bibenzimidazole
MAPEBKBH_04411	3.A.12.1.1	4.64e-114	381	gnl|TC-DB|P21458|3.A.12.1.1 Stage III sporulation protein E - Bacillus subtilis.	NA	NA	NA	NA	CHEBI:4291;deoxyribonucleic acid
MAPEBKBH_04589	3.A.3.5.38	7.63e-225	647	gnl|TC-DB|D1CA99|3.A.3.5.38 Copper-translocating P-type ATPase OS=Sphaerobacter thermophilus (strain DSM 20745 / S 6022) GN=Sthe_3342 PE=3 SV=1	3.A.3.5	3.A.3	P-ATPase	P-type ATPase (P-ATPase) Superfamily	CHEBI:23379;copper(1+)
MAPEBKBH_05073	3.D.1.5.1	3.22e-155	443	gnl|TC-DB|Q74GA5|3.D.1.5.1 NADH dehydrogenase I, D subunit - Geobacter sulfurreducens.	3.D.1.5	3.D.1	NDH	Iron-Sulfur Protein (ISP) Superfamily	CHEBI:5584;hydron
MAPEBKBH_05109	3.A.1.132.4	3.32e-202	601	gnl|TC-DB|Q2SDB0|3.A.1.132.4 ABC-type transport system involved in multi-copper enzyme maturation, permease component - Hahella chejuensis (strain KCTC 2396).	3.A.1.132	3.A.1	ABC	ABC1, ABC2, ABC3 Superfamilies	NA

## Sheet: CFX14
ORF	Classification	Subclassification	k number	ko definition	ko name	blastp subject	blastp evalue	blastp bitscore
BAGNIKDI_00281	Carbon	Acetate fermentation	K01512	acylphosphatase	acyP	MBN1121512.1 acylphosphatase [Anaerolineae bacterium]	3.33e-32	118
BAGNIKDI_02736	Carbon	Carbon fixation	K00198	anaerobic carbon-monoxide dehydrogenase catalytic subunit	acsA	MBC8333008.1 anaerobic carbon-monoxide dehydrogenase catalytic subunit [Anaerolineae bacterium]	0	1172
BAGNIKDI_01242	Carbon	Gluconeogenesis	K03841	fructose-1,6-bisphosphatase I	fbp	HEC21302.1 class 1 fructose-bisphosphatase [Chloroflexi bacterium]	4.48e-197	556
BAGNIKDI_00906	Carbon	Glycolysis	K25026	glucokinase?	glk	NDJ51499.1 ROK family protein [Chloroflexi bacterium]	4.12e-142	414
BAGNIKDI_01121	Carbon	Glycolysis	K21071	ATP-dependent phosphofructokinase	pfk	HEC22799.1 phosphofructokinase [Chloroflexi bacterium]	2.01e-231	645
BAGNIKDI_02164	Carbon	Glycolysis	K21071	ATP-dependent phosphofructokinase	pfk	RME99429.1 6-phosphofructokinase [Chloroflexi bacterium]	1.06e-189	539
BAGNIKDI_02687	Nitrogen	Nitrification	K10945	methane/ammonia monooxygenase subunit B	pmoB/amoB	WP_074744609.1 methane monooxygenase/ammonia monooxygenase subunit B [Nitrosospira multiformis]	5.96e-129	378
BAGNIKDI_02688	Nitrogen	Nitrification	K10944	methane/ammonia monooxygenase subunit A	pmoA/amoA	WP_011380154.1 methane monooxygenase/ammonia monooxygenase subunit A [Nitrosospira multiformis]	3.13e-205	570
BAGNIKDI_02689	Nitrogen	Nitrification	K10946	methane/ammonia monooxygenase subunit C	pmoC/amoC	ODT64010.1 methane monooxygenase/ammonia monooxygenase subunit C [Nitrosomonadales bacterium SCN 54-20]	1.15e-116	341
BAGNIKDI_02978	Nitrogen	Nitrification	K10535	hydroxylamine dehydrogenase	hao	WP_074709431.1 hydroxylamine reductase [Nitrosospira multiformis]	2.98e-247	691
BAGNIKDI_01027	Nitrogen	Organic-N	K01426	amidase	amiE	MBI4758105.1 acetamidase/formamidase family protein [Chloroflexi bacterium]	1.46e-157	453
BAGNIKDI_00093	Carbon	propionate production	K01848	methylmalonyl-CoA mutase, N-terminal domain	mcmA1	HEC21752.1 methylmalonyl-CoA mutase [Chloroflexi bacterium]	6.16e-307	850
BAGNIKDI_00094	Carbon	propionate production	K05606	methylmalonyl-CoA/ethylmalonyl-CoA epimerase	MCEE, epi	GBD09990.1 Lactoylglutathione lyase [Candidatus Thermoflexus japonica]	1.18e-54	178
BAGNIKDI_00573	Carbon	propionate production	K01848	methylmalonyl-CoA mutase, N-terminal domain	mcmA1	HEC23148.1 methylmalonyl-CoA mutase [Chloroflexi bacterium]	0	907
BAGNIKDI_01289	Carbon	propionate production	K01966	propionyl-CoA carboxylase beta chain	pccB	HEC22317.1 acyl-CoA carboxylase subunit beta [Chloroflexi bacterium]	0	884
BAGNIKDI_02485	Carbon	propionate production	K24012	acetate---CoA ligase (ADP-forming)	acdAB	HEC22415.1 CoA-binding protein [Chloroflexi bacterium]	1.61e-197	571
BAGNIKDI_03021	Carbon	propionate production	K01849	methylmalonyl-CoA mutase, C-terminal domain	mcmA2	NOY97839.1 cobalamin B12-binding domain-containing protein [Chloroflexi bacterium]	4.37e-68	211
BAGNIKDI_00826	Oxygen	ROS defense	K00384	thioredoxin reductase (NADPH)	trxB, TRR	HEC23380.1 FAD-binding protein [Chloroflexi bacterium]	2.93e-154	445
BAGNIKDI_01216	Oxygen	ROS defense	K03671	thioredoxin 1	trxA	HEC22938.1 thioredoxin [Chloroflexi bacterium]	2.62e-80	251
BAGNIKDI_01963	Oxygen	ROS defense	K00384	thioredoxin reductase (NADPH)	trxB, TRR	NLH06656.1 thioredoxin-disulfide reductase [Chloroflexi bacterium]	2.2e-175	498
BAGNIKDI_02516	Oxygen	ROS defense	K03671	thioredoxin 1	trxA	MBN1229113.1 thioredoxin family protein [Anaerolineae bacterium]	3.02e-18	81.6
BAGNIKDI_02541	Oxygen	ROS defense	K03671	thioredoxin 1	trxA	MBI5670026.1 thioredoxin [Chloroflexi bacterium]	4.12e-33	122
BAGNIKDI_03381	Oxygen	ROS defense	K03671	thioredoxin 1	trxA	MBL8366243.1 thioredoxin TrxA [Comamonas sp.]	7.55e-63	198
BAGNIKDI_00002	Oxygen	Terminal oxidase	K00425	cytochrome bd ubiquinol oxidase subunit I	cydA	MBC6935515.1 cytochrome ubiquinol oxidase subunit I [Chloroflexi bacterium]	5.62e-88	277
BAGNIKDI_01255	Oxygen	Terminal oxidase	K02274	cytochrome c oxidase subunit I	coxA, ctaD	NLH06277.1 cytochrome c oxidase subunit I [Chloroflexi bacterium]	1.67e-302	839
BAGNIKDI_01399	Oxygen	Terminal oxidase	K00425	cytochrome bd ubiquinol oxidase subunit I	cydA	NIV38104.1 cytochrome ubiquinol oxidase subunit I [Anaerolineae bacterium]	3.52e-70	218
BAGNIKDI_03166	Oxygen	Terminal oxidase	K02274	cytochrome c oxidase subunit I	coxA, ctaD	MBE7544944.1 cytochrome c oxidase subunit I [Solibacteraceae bacterium]	1.17e-58	199
BAGNIKDI_03328	Oxygen	Terminal oxidase	K00425	cytochrome bd ubiquinol oxidase subunit I	cydA	OGO38124.1 cytochrome D ubiquinol oxidase subunit I [Chloroflexi bacterium RBG_16_57_11]	2.31e-108	329
Transporter
ORF	TCID	evalue	bitscore	gene.product	Subfamily	Family	Fam_abbreviation	Superfamily	substrate
BAGNIKDI_00004	3.A.1.106.12	2.39e-112	346	gnl|TC-DB|Q7NL26|3.A.1.106.12 HlyB/MsbA family ABC transporter OS=Gloeobacter violaceus (strain PCC 7421) GN=glr1300 PE=3 SV=1	3.A.1.106	3.A.1	ABC	ABC1, ABC2, ABC3 Superfamilies	CHEBI:14911;protein
BAGNIKDI_00084	3.A.23.6.1	1.17e-111	327	gnl|TC-DB|B3ET62|3.A.23.6.1 Glyceraldehyde-3-phosphate dehydrogenase OS=Amoebophilus asiaticus (strain 5a2) GN=Aasi_1069 PE=3 SV=1	3.A.23.6	3.A.23	T6SS	ATP-dependent Clp Protease (Clp) Superfamily	NA
BAGNIKDI_00117	3.A.1.2.12	5.34e-174	499	gnl|TC-DB|Q8DU37|3.A.1.2.12 Putative sugar ABC transporter, ATP-binding protein - Streptococcus mutans.	3.A.1.2	3.A.1	ABC	ABC1, ABC2, ABC3 Superfamilies	CHEBI:23636;deoxyribonucleoside
BAGNIKDI_00150	3.D.1.5.1	2.09e-107	328	gnl|TC-DB|Q74GA5|3.D.1.5.1 NADH dehydrogenase I, D subunit - Geobacter sulfurreducens.	3.D.1.5	3.D.1	NDH	Iron-Sulfur Protein (ISP) Superfamily	CHEBI:5584;hydron
BAGNIKDI_00210	2.A.6.6.11	7.66e-104	314	gnl|TC-DB|Q6MMK1|2.A.6.6.11 3-hydroxy-3-methylglutaryl coenzyme A reductase OS=Bdellovibrio bacteriovorus (strain ATCC 15356 / DSM 50701 / NCIB 9529 / HD100) GN=Bd1627 PE=3 SV=1	2.A.6.6	2.A.6	RND	Resistance-Nodulation-Cell Division (RND) Superfamily	CHEBI:10545;electron
BAGNIKDI_00220	4.D.1.1.14	4.99e-101	299	gnl|TC-DB|Q55487|4.D.1.1.14 Uncharacterized glycosyltransferase sll0501 OS=Synechocystis sp. (strain PCC 6803 / Kazusa) GN=sll0501 PE=3 SV=1	4.D.1.1	4.D.1	VGP	Glycosyl Transferase/Transporter (GTT) Superfamily	NA
BAGNIKDI_00343	3.A.1.5.20	9.29e-137	390	gnl|TC-DB|P42065|3.A.1.5.20 Oligopeptide transport ATP-binding protein appF - Bacillus subtilis.	3.A.1.5	3.A.1	ABC	ABC1, ABC2, ABC3 Superfamilies	CHEBI:7755;oligopeptide
BAGNIKDI_00344	3.A.1.5.12	1.41e-117	342	gnl|TC-DB|Q9X0F4|3.A.1.5.12 Oligopeptide ABC transporter, ATP-binding protein - Thermotoga maritima	3.A.1.5	3.A.1	ABC	ABC1, ABC2, ABC3 Superfamilies	CHEBI:26546;rhamnose
BAGNIKDI_00385	3.A.3.6.27	3.38e-178	531	gnl|TC-DB|Q1LAJ7|3.A.3.6.27 CzcP cation efflux P1-ATPase OS=Cupriavidus metallidurans (strain ATCC 43123 / DSM 2839 / NBRC 102507 / CH34) GN=czcP PE=1 SV=1	3.A.3.6	3.A.3	P-ATPase	P-type ATPase (P-ATPase) Superfamily	CHEBI:3290;cadmium(2+)|CHEBI:23337;cobalt(2+)|CHEBI:10113;zinc(2+)
BAGNIKDI_00413	3.D.7.1.3	8.74e-129	394	gnl|TC-DB|WP_011746282|3.D.7.1.3 electron transporter [Chlorobium phaeobacteroides]	3.D.7.1	3.D.7	HHO	Iron-Sulfur Protein (ISP) Superfamily	CHEBI:10545;electron
BAGNIKDI_00445	3.A.1.2.20	8.56e-128	380	gnl|TC-DB|G4FGN3|3.A.1.2.20 Monosaccharide-transporting ATPase OS=Thermotoga maritima (strain ATCC 43589 / MSB8 / DSM 3109 / JCM 10099) GN=ThemaDRAFT_1375 PE=3 SV=1	3.A.1.2	3.A.1	ABC	ABC1, ABC2, ABC3 Superfamilies	CHEBI:10085;xylose|CHEBI:5418;glucose
BAGNIKDI_00493	2.A.5.5.10	3.82e-107	310	gnl|TC-DB|Q72FY4|2.A.5.5.10 ZIP zinc transporter family protein OS=Desulfovibrio vulgaris (strain ATCC 29579 / DSM 644 / NCIMB 8303 / VKM B-1760 / Hildenborough) OX=882 GN=DVU_0079 PE=4 SV=1	NA	NA	NA	NA	CHEBI:29033;iron(2+)|CHEBI:49972;zinc(2+)
BAGNIKDI_00494	3.A.3.6.8	7.7e-157	472	gnl|TC-DB|Q60048|3.A.3.6.8 Probable cadmium-transporting ATPase - Listeria monocytogenes.	3.A.3.6	3.A.3	P-ATPase	P-type ATPase (P-ATPase) Superfamily	CHEBI:3290;cadmium(2+)
BAGNIKDI_00538	3.B.1.1.5	2.9e-210	592	gnl|TC-DB|Q9V0A4|3.B.1.1.5 Methylmalonyl-CoA decarboxylase, subunit A LPHA (MMDA) - Pyrococcus abyssi.	3.B.1.1	3.B.1	NaT-DC	CPA Superfamily	CHEBI:9175;sodium(1+)
BAGNIKDI_00541	3.B.1.1.5	1.37e-124	364	gnl|TC-DB|Q9V0A7|3.B.1.1.5 Methylmalonyl-CoA decarboxylase, beta subunit - Pyrococcus abyssi.	3.B.1.1	3.B.1	NaT-DC	CPA Superfamily	CHEBI:9175;sodium(1+)
BAGNIKDI_00576	3.A.10.2.2	1.03e-158	481	gnl|TC-DB|Q6BCL0|3.A.10.2.2 H+-pyrophosphatase - Streptomyces coelicolor.	NA	NA	NA	NA	CHEBI:5584;hydron
BAGNIKDI_00603	3.A.9.1.2	7.04e-296	838	gnl|TC-DB|Q9FI56|3.A.9.1.2 Chaperone protein ClpC1, chloroplastic OS=Arabidopsis thaliana GN=CLPC1 PE=1 SV=1	3.A.9.1	3.A.9	CEPT or Tic-Toc	ATP-dependent Clp Protease (Clp) Superfamily	CHEBI:8526;protein polypeptide chain
BAGNIKDI_00617	3.A.29.1.5	3.06e-194	560	gnl|TC-DB|P0AAI3|3.A.29.1.5 ATP-dependent zinc metalloprotease FtsH OS=Escherichia coli (strain K12) OX=83333 GN=ftsH PE=1 SV=1	3.A.29.1	3.A.29	MIMP	AAA-ATPase Superfamily	NA
BAGNIKDI_00623	3.A.1.17.8	1.01e-110	324	gnl|TC-DB|A7NH44|3.A.1.17.8 NMT1/THI5 like domain protein OS=Roseiflexus castenholzii (strain DSM 13941 / HLO8) GN=Rcas_0667 PE=4 SV=1	3.A.1.17	3.A.1	ABC	ABC1, ABC2, ABC3 Superfamilies	CHEBI:9530;thiamine(1+)
BAGNIKDI_00632	3.A.12.1.1	7.91e-118	381	gnl|TC-DB|P21458|3.A.12.1.1 Stage III sporulation protein E - Bacillus subtilis.	NA	NA	NA	NA	CHEBI:4291;deoxyribonucleic acid
BAGNIKDI_00808	3.D.1.3.1	7.63e-159	453	gnl|TC-DB|Q56220|3.D.1.3.1 NADH-quinone oxidoreductase chain 4 (EC 1.6.99.5) (NADH dehydrogenase I, chain 4) (NDH-1, chain 4) - Thermus thermophilus.	3.D.1.3	3.D.1	NDH	Iron-Sulfur Protein (ISP) Superfamily	CHEBI:5584;hydron
BAGNIKDI_00811	3.D.1.3.1	1.4e-141	411	gnl|TC-DB|Q56222|3.D.1.3.1 NADH-quinone oxidoreductase chain 1 (EC 1.6.99.5) (NADH dehydrogenase I, chain 1) (NDH-1, chain 1) - Thermus thermophilus.	3.D.1.3	3.D.1	NDH	Iron-Sulfur Protein (ISP) Superfamily	CHEBI:5584;hydron
BAGNIKDI_00813	3.D.1.5.1	1.47e-103	306	gnl|TC-DB|Q746T2|3.D.1.5.1 NADH-quinone oxidoreductase subunit H 2 - Geobacter sulfurreducens.	3.D.1.5	3.D.1	NDH	Iron-Sulfur Protein (ISP) Superfamily	CHEBI:5584;hydron
BAGNIKDI_00817	3.D.1.2.1	3.91e-112	355	gnl|TC-DB|P29924|3.D.1.2.1 NADH-ubiquinone oxidoreductase chain 12 (EC 1.6.5.3) (NADH dehydrogenase 1, chain 12) (NDH-1, chain 12) - Paracoccus denitrificans.	3.D.1.2	3.D.1	NDH	Iron-Sulfur Protein (ISP) Superfamily	CHEBI:5584;hydron
BAGNIKDI_00818	3.D.1.2.1	1.61e-141	416	gnl|TC-DB|P29925|3.D.1.2.1 NADH-ubiquinone oxidoreductase chain 13 (EC 1.6.5.3) (NADH dehydrogenase 1, chain 13) (NDH-1, chain 13) - Paracoccus denitrificans.	3.D.1.2	3.D.1	NDH	Iron-Sulfur Protein (ISP) Superfamily	CHEBI:5584;hydron
BAGNIKDI_00866	3.A.1.144.4	8.24e-112	325	gnl|TC-DB|E1IBA4|3.A.1.144.4 ABC transporter related protein OS=Oscillochloris trichoides DG-6 GN=OSCT_0605 PE=3 SV=1	3.A.1.144	3.A.1	ABC	ABC1, ABC2, ABC3 Superfamilies	NA
BAGNIKDI_01020	3.A.1.2.19	1.2e-118	358	gnl|TC-DB|Q9X051|3.A.1.2.19 Ribose import ATP-binding protein RbsA 2 OS=Thermotoga maritima (strain ATCC 43589 / MSB8 / DSM 3109 / JCM 10099) GN=rbsA2 PE=3 SV=1	3.A.1.2	3.A.1	ABC	ABC1, ABC2, ABC3 Superfamilies	CHEBI:10410;beta-D-ribopyranose
BAGNIKDI_01030	3.A.29.1.5	2.49e-198	572	gnl|TC-DB|P0AAI3|3.A.29.1.5 ATP-dependent zinc metalloprotease FtsH OS=Escherichia coli (strain K12) OX=83333 GN=ftsH PE=1 SV=1	3.A.29.1	3.A.29	MIMP	AAA-ATPase Superfamily	NA
BAGNIKDI_01069	2.A.33.1.1	1.66e-101	313	gnl|TC-DB|P13738|2.A.33.1.1 NA(+)/H(+) ANTIPORTER 1 (SODIUM/PROTON ANTIPORTER 1) - Escherichia coli.	NA	NA	NA	NA	CHEBI:9175;sodium(1+)|CHEBI:24636;proton
BAGNIKDI_01070	3.A.1.106.3	1.51e-111	346	gnl|TC-DB|Q8G7R7|3.A.1.106.3 Probable permease protein of ABC transporter system OS=Bifidobacterium longum GN=BL0180 PE=3 SV=1	3.A.1.106	3.A.1	ABC	ABC1, ABC2, ABC3 Superfamilies	CHEBI:59062;polymyxin|CHEBI:135075;alphaprodine
BAGNIKDI_01071	3.A.1.106.17	6.38e-112	346	gnl|TC-DB|C1F8I9|3.A.1.106.17 Efflux ABC transporter, permease/ATP-binding protein OS=Acidobacterium capsulatum (strain ATCC 51196 / DSM 11244 / JCM 7670 / NBRC 15755 / NCIMB 13165 / 161) OX=240015 GN=ACP_0113 PE=4 SV=1	3.A.1.106	3.A.1	ABC	ABC1, ABC2, ABC3 Superfamilies	NA
BAGNIKDI_01087	3.A.1.2.20	1.35e-152	444	gnl|TC-DB|G4FGN3|3.A.1.2.20 Monosaccharide-transporting ATPase OS=Thermotoga maritima (strain ATCC 43589 / MSB8 / DSM 3109 / JCM 10099) GN=ThemaDRAFT_1375 PE=3 SV=1	3.A.1.2	3.A.1	ABC	ABC1, ABC2, ABC3 Superfamilies	CHEBI:10085;xylose|CHEBI:5418;glucose
BAGNIKDI_01103	3.A.3.5.38	5.41e-127	383	gnl|TC-DB|D1CA99|3.A.3.5.38 Copper-translocating P-type ATPase OS=Sphaerobacter thermophilus (strain DSM 20745 / S 6022) GN=Sthe_3342 PE=3 SV=1	3.A.3.5	3.A.3	P-ATPase	P-type ATPase (P-ATPase) Superfamily	CHEBI:23379;copper(1+)
BAGNIKDI_01107	3.A.9.1.2	1.68e-259	745	gnl|TC-DB|Q9FI56|3.A.9.1.2 Chaperone protein ClpC1, chloroplastic OS=Arabidopsis thaliana GN=CLPC1 PE=1 SV=1	3.A.9.1	3.A.9	CEPT or Tic-Toc	ATP-dependent Clp Protease (Clp) Superfamily	CHEBI:8526;protein polypeptide chain
BAGNIKDI_01130	3.A.1.5.20	3.15e-143	407	gnl|TC-DB|P42065|3.A.1.5.20 Oligopeptide transport ATP-binding protein appF - Bacillus subtilis.	3.A.1.5	3.A.1	ABC	ABC1, ABC2, ABC3 Superfamilies	CHEBI:7755;oligopeptide
BAGNIKDI_01131	3.A.1.5.15	3.33e-118	343	gnl|TC-DB|Q9X271|3.A.1.5.15 Oligopeptide ABC transporter, ATP-binding protein - Thermotoga maritima	3.A.1.5	3.A.1	ABC	ABC1, ABC2, ABC3 Superfamilies	CHEBI:25169;mannoside|CHEBI:14575;mannose
BAGNIKDI_01134	3.A.1.5.26	6.4e-138	417	gnl|TC-DB|P63395|3.A.1.5.26 Uncharacterized ABC transporter ATP-binding protein Rv1281c/MT1318 OS=Mycobacterium tuberculosis GN=Rv1281c PE=3 SV=1	3.A.1.5	3.A.1	ABC	ABC1, ABC2, ABC3 Superfamilies	CHEBI:5437;glutathione|CHEBI:3165;bradykinin
BAGNIKDI_01144	3.A.1.2.29	3.91e-133	395	gnl|TC-DB|Q3MB44|3.A.1.2.29 Ribose import ATP-binding protein RbsA OS=Anabaena variabilis (strain ATCC 29413 / PCC 7937) GN=rbsA PE=3 SV=1	3.A.1.2	3.A.1	ABC	ABC1, ABC2, ABC3 Superfamilies	CHEBI:4119;keto-D-fructose
BAGNIKDI_01153	3.A.1.13.2	6.19e-119	348	gnl|TC-DB|A9WCZ6|3.A.1.13.2 Transport system permease protein OS=Chloroflexus aurantiacus (strain ATCC 29366 / DSM 635 / J-10-fl) GN=Caur_0314 PE=3 SV=1	3.A.1.13	3.A.1	ABC	ABC1, ABC2, ABC3 Superfamilies	CHEBI:30411;cobalamin
BAGNIKDI_01154	3.A.1.13.2	3.79e-108	318	gnl|TC-DB|A9WCZ7|3.A.1.13.2 ABC transporter related OS=Chloroflexus aurantiacus (strain ATCC 29366 / DSM 635 / J-10-fl) GN=Caur_0315 PE=4 SV=1	3.A.1.13	3.A.1	ABC	ABC1, ABC2, ABC3 Superfamilies	CHEBI:30411;cobalamin
BAGNIKDI_01156	3.A.1.135.12	1.87e-150	446	gnl|TC-DB|KKK43438|3.A.1.135.12 putative ABC transporter ATP-binding protein [Lokiarchaeum sp. GC14_75]	3.A.1.135	3.A.1	ABC	ABC1, ABC2, ABC3 Superfamilies	NA
BAGNIKDI_01157	3.A.1.135.12	9.15e-146	434	gnl|TC-DB|KKK43437|3.A.1.135.12 putative multidrug export ATP-binding/permease protein [Lokiarchaeum sp. GC14_75]	3.A.1.135	3.A.1	ABC	ABC1, ABC2, ABC3 Superfamilies	NA
BAGNIKDI_01177	3.A.3.5.18	3.75e-143	433	gnl|TC-DB|O32220|3.A.3.5.18 Copper-transporting P-type ATPase copA - Bacillus subtilis.	3.A.3.5	3.A.3	P-ATPase	P-type ATPase (P-ATPase) Superfamily	CHEBI:49551;copper(1+)
BAGNIKDI_01255	3.D.4.4.5	7.09e-186	533	gnl|TC-DB|Q9X813|3.D.4.4.5 Probable cytochrome c oxidase subunit 1-alpha OS=Streptomyces coelicolor (strain ATCC BAA-471 / A3(2) / M145) OX=100226 GN=ctaD1 PE=3 SV=1	NA	NA	NA	NA	CHEBI:5584;hydron
BAGNIKDI_01271	3.A.1.2.32	1.25e-102	309	gnl|TC-DB|B3EYM2|3.A.1.2.32 L-arabinose membrane permease OS=Geobacillus stearothermophilus OX=1422 GN=araH PE=4 SV=1	3.A.1.2	3.A.1	ABC	ABC1, ABC2, ABC3 Superfamilies	CHEBI:22599;arabinose
BAGNIKDI_01272	3.A.1.2.32	1.5e-203	574	gnl|TC-DB|B3EYM1|3.A.1.2.32 L-arabinose transport ATP-binding protein OS=Geobacillus stearothermophilus OX=1422 GN=araG PE=4 SV=1	3.A.1.2	3.A.1	ABC	ABC1, ABC2, ABC3 Superfamilies	CHEBI:22599;arabinose
BAGNIKDI_01289	3.B.1.1.2	4.05e-222	622	gnl|TC-DB|Q57079|3.B.1.1.2 ALPHA-SUBUNIT,METHYLMALONYL-COA DECARBOXYLASE - Veillonella parvula.	3.B.1.1	3.B.1	NaT-DC	CPA Superfamily	CHEBI:9175;sodium(1+)
BAGNIKDI_01297	3.A.11.1.5	3.86e-107	343	gnl|TC-DB|AKM80781.1|3.A.11.1.5 hypothetical protein UW38_C0001G0951 [Candidatus Saccharibacteria bacterium GW2011_GWC2_44_17]	NA	NA	NA	NA	NA
BAGNIKDI_01333	3.A.1.2.12	1.7e-158	460	gnl|TC-DB|Q8DU37|3.A.1.2.12 Putative sugar ABC transporter, ATP-binding protein - Streptococcus mutans.	3.A.1.2	3.A.1	ABC	ABC1, ABC2, ABC3 Superfamilies	CHEBI:23636;deoxyribonucleoside
BAGNIKDI_01392	3.D.9.1.2	6.56e-123	367	gnl|TC-DB|OLS18213|3.D.9.1.2 Formate hydrogenlyase subunit 5 precursor [Candidatus Odinarchaeota archaeon LCB_4]	3.D.9.1	3.D.9	F420H2DH	Iron-Sulfur Protein (ISP) Superfamily	CHEBI:24636;proton
BAGNIKDI_01550	2.A.49.6.4	1.05e-106	341	gnl|TC-DB|Q9HPN8|2.A.49.6.4 Chloride channel OS=Halobacterium salinarum (strain ATCC 700922 / JCM 11081 / NRC-1) GN=clc PE=4 SV=1	NA	NA	NA	NA	CHEBI:3731;chloride|CHEBI:5584;hydron
BAGNIKDI_01560	3.A.1.2.19	3.03e-155	452	gnl|TC-DB|Q9X051|3.A.1.2.19 Ribose import ATP-binding protein RbsA 2 OS=Thermotoga maritima (strain ATCC 43589 / MSB8 / DSM 3109 / JCM 10099) GN=rbsA2 PE=3 SV=1	3.A.1.2	3.A.1	ABC	ABC1, ABC2, ABC3 Superfamilies	CHEBI:10410;beta-D-ribopyranose
BAGNIKDI_01571	3.A.3.6.1	2.12e-110	342	gnl|TC-DB|P20021|3.A.3.6.1 PROBABLE CADMIUM-TRANSPORTING ATPASE (EC 3.6.3.3) (CADMIUM EFFLUX ATPASE) - Staphylococcus aureus.	3.A.3.6	3.A.3	P-ATPase	P-type ATPase (P-ATPase) Superfamily	CHEBI:3290;cadmium(2+)|CHEBI:49807;lead(2+)|CHEBI:10113;zinc(2+)|CHEBI:5584;hydron
BAGNIKDI_01621	3.A.1.2.29	8.47e-132	392	gnl|TC-DB|Q3MB44|3.A.1.2.29 Ribose import ATP-binding protein RbsA OS=Anabaena variabilis (strain ATCC 29413 / PCC 7937) GN=rbsA PE=3 SV=1	3.A.1.2	3.A.1	ABC	ABC1, ABC2, ABC3 Superfamilies	CHEBI:4119;keto-D-fructose
BAGNIKDI_01730	3.A.1.2.20	8.1e-138	407	gnl|TC-DB|G4FGN3|3.A.1.2.20 Monosaccharide-transporting ATPase OS=Thermotoga maritima (strain ATCC 43589 / MSB8 / DSM 3109 / JCM 10099) GN=ThemaDRAFT_1375 PE=3 SV=1	3.A.1.2	3.A.1	ABC	ABC1, ABC2, ABC3 Superfamilies	CHEBI:10085;xylose|CHEBI:5418;glucose
BAGNIKDI_01825	3.A.5.4.1	6.89e-190	584	gnl|TC-DB|Q5N2Q7|3.A.5.4.1 Protein translocase subunit SecA OS=Synechococcus sp. (strain ATCC 27144 / PCC 6301 / SAUG 1402/1) OX=269084 GN=secA PE=3 SV=1	3.A.5.4	3.A.5	Sec	Ankyrin Repeat Domain-containing (Ank) Superfamily	CHEBI:8526;protein polypeptide chain
BAGNIKDI_01896	9.A.47.2.1	4.17e-136	398	gnl|TC-DB|Q7UHP7|9.A.47.2.1 Putative secretory protein OS=Rhodopirellula baltica (strain SH1) GN=RB13073 PE=4 SV=1	NA	NA	NA	NA	CHEBI:8526;protein polypeptide chain
BAGNIKDI_01909	3.D.1.8.2	1.61e-125	389	gnl|TC-DB|Q8DKX9|3.D.1.8.2 NADH dehydrogenase subunit 5 OS=Thermosynechococcus elongatus (strain BP-1) OX=197221 GN=ndhF1 PE=1 SV=1	3.D.1.8	3.D.1	NDH	Iron-Sulfur Protein (ISP) Superfamily	CHEBI:24636;proton
BAGNIKDI_01910	3.D.1.2.1	3.28e-109	334	gnl|TC-DB|P29925|3.D.1.2.1 NADH-ubiquinone oxidoreductase chain 13 (EC 1.6.5.3) (NADH dehydrogenase 1, chain 13) (NDH-1, chain 13) - Paracoccus denitrificans.	3.D.1.2	3.D.1	NDH	Iron-Sulfur Protein (ISP) Superfamily	CHEBI:5584;hydron
BAGNIKDI_01950	3.A.2.1.1	1.76e-215	601	gnl|TC-DB|P0ABB4|3.A.2.1.1 ATP synthase subunit beta - Escherichia coli.	NA	NA	NA	NA	CHEBI:5584;hydron
BAGNIKDI_01952	3.A.2.1.10	1.91e-201	568	gnl|TC-DB|BAK19946|3.A.2.1.10 ApH+ATPase alpha subunit [Aphanothece halophytica]	NA	NA	NA	NA	NA
BAGNIKDI_02046	1.A.33.1.2	4.82e-245	689	gnl|TC-DB|P0A6Y8|1.A.33.1.2 Chaperone protein dnaK - Escherichia coli.	NA	NA	NA	NA	CHEBI:24870;ion
BAGNIKDI_02171	3.A.1.11.10	1.58e-110	327	gnl|TC-DB|Q3MAR5|3.A.1.11.10 Spermidine/putrescine import ATP-binding protein PotA OS=Anabaena variabilis (strain ATCC 29413 / PCC 7937) OX=240292 GN=potA PE=3 SV=1	3.A.1.11	3.A.1	ABC	ABC1, ABC2, ABC3 Superfamilies	CHEBI:51349;polyamine macromolecule|CHEBI:10651;sym-homospermidine
BAGNIKDI_02181	3.A.5.1.1	6.18e-136	397	gnl|TC-DB|P0AGD7|3.A.5.1.1 Signal recognition particle protein - Escherichia coli.	3.A.5.1	3.A.5	Sec	Ankyrin Repeat Domain-containing (Ank) Superfamily	CHEBI:8526;protein polypeptide chain
BAGNIKDI_02202	3.A.1.125.2	1.89e-138	421	gnl|TC-DB|Q7D911|3.A.1.125.2 Putative uncharacterized protein - Mycobacterium tuberculosis.	3.A.1.125	3.A.1	ABC	ABC1, ABC2, ABC3 Superfamilies	NA
BAGNIKDI_02295	9.B.111.1.5	1.42e-108	343	gnl|TC-DB|WP_121250785|9.B.111.1.5 lysine--tRNA ligase [Solirubrobacter pauli]	9.B.111.1	9.B.111	LysS	Major Facilitator (MFS) Superfamily	NA
BAGNIKDI_02303	9.B.144.1.2	2.74e-152	473	gnl|TC-DB|I0I171|9.B.144.1.2 Uncharacterized protein OS=Caldilinea aerophila (strain DSM 14535 / JCM 11387 / NBRC 104270 / STL-6-O1) GN=CLDAP_09690 PE=4 SV=1	9.B.144.1	9.B.144	DUF3367	Glycosyl/Acyl Transferase (GAT) Superfamily	NA
BAGNIKDI_02427	2.A.7.3.49	8.03e-126	383	gnl|TC-DB|D9SZH8|2.A.7.3.49 Peptidase S8 and S53 subtilisin kexin sedolisin OS=Micromonospora aurantiaca (strain ATCC 27029 / DSM 43813 / JCM 10878 / NBRC 16125 / INA 9442) GN=Micau_5747 PE=4 SV=1	2.A.7.3	2.A.7	DMT	Drug/Metabolite Transporter (DMT) Superfamily	CHEBI:7990;peptide
BAGNIKDI_02575	3.A.1.7.3	4.28e-106	308	gnl|TC-DB|C3KCB5|3.A.1.7.3 Putative ABC transporter ATP-binding protein OS=Pseudomonas fluorescens (strain SBW25) GN=PFLU_3315 PE=3 SV=1	3.A.1.7	3.A.1	ABC	ABC1, ABC2, ABC3 Superfamilies	CHEBI:7793;phosphate(3-)
BAGNIKDI_02980	3.D.10.1.9	2.27e-129	382	gnl|TC-DB|I7FYK4|3.D.10.1.9 Succinate dehydrogenase flavoprotein subunit OS=Mycolicibacterium smegmatis (strain ATCC 700084 / mc(2)155) OX=246196 GN=sdhA PE=3 SV=1	3.D.10.1	3.D.10	SDH	Iron-Sulfur Protein (ISP) Superfamily	CHEBI:24636;proton|CHEBI:30031;succinate(2-)|CHEBI:29806;fumarate(2-)|CHEBI:10545;electron
BAGNIKDI_02986	2.A.56.1.1	9.63e-134	382	gnl|TC-DB|P37735|2.A.56.1.1 C4-dicarboxylate-binding periplasmic protein precursor - Rhodobacter capsulatus (Rhodopseudomonas capsulata).	2.A.56.1	2.A.56	TRAP-T	IT Superfamily	CHEBI:5584;hydron|CHEBI:14584;mesaconate(2-)|CHEBI:17240;itaconate(2-)|CHEBI:15595;malate(2-)|CHEBI:30031;succinate(2-)|CHEBI:42511;fumarate(2-)|CHEBI:30839;orotate
BAGNIKDI_03485	8.A.173.1.2	2.16e-191	533	gnl|TC-DB|Q9H4B7|8.A.173.1.2 Tubulin beta-1 chain OS=Homo sapiens OX=9606 GN=TUBB1 PE=1 SV=1	NA	NA	NA	NA	NA

## Sheet: CFX09
ORF	Classification	Subclassification	k number	ko definition	ko name	blastp subject	blastp evalue	blastp bitscore
JLAFPPAO_02690	Carbon	acetate assimilation	K01895	acetyl-CoA synthetase	acs	MBE7436178.1 AMP-binding protein [Anaerolineales bacterium]	0	1264
JLAFPPAO_02933	Carbon	Acetate fermentation	K01512	acylphosphatase	acyP	MBE7433272.1 acylphosphatase [Anaerolineales bacterium]	1.79e-67	207
JLAFPPAO_00989	Carbon	Carbon fixation	K14138	acetyl-CoA synthase	acsB	MBE7434538.1 CO dehydrogenase/CO-methylating acetyl-CoA synthase complex subunit beta [Anaerolineales bacterium]	0	1527
JLAFPPAO_00990	Carbon	Carbon fixation	K00198	anaerobic carbon-monoxide dehydrogenase catalytic subunit	acsA	MBE7434537.1 anaerobic carbon-monoxide dehydrogenase catalytic subunit [Anaerolineales bacterium]	0	1325
JLAFPPAO_03007	Nitrogen	Denitrification	K15864	nitrite reductase (NO-forming)	nirS	MBE7432777.1 c-type cytochrome [Anaerolineales bacterium]	0	1357
JLAFPPAO_03008	Nitrogen	Denitrification	K00368	nitrite reductase (NO-forming)	nirK	KAA0276016.1 nitrite reductase, copper-containing [Chloroflexi bacterium]	0	1199
JLAFPPAO_03394	Nitrogen	Denitrification	K02305	nitric oxide reductase subunit C	norC	WP_103965172.1 cytochrome c [Nitrosomonas ureae]	2.29e-105	307
JLAFPPAO_03395	Nitrogen	Denitrification	K04561	nitric oxide reductase subunit B	norB	WP_103965171.1 cbb3-type cytochrome c oxidase subunit I [Nitrosomonas ureae]	0	870
JLAFPPAO_00294	Nitrogen	DNRA	K03385	nitrite reductase (cytochrome c-552)	nrfA	MBE7432579.1 ammonia-forming cytochrome c nitrite reductase subunit c552 [Anaerolineales bacterium]	0	905
JLAFPPAO_00295	Nitrogen	DNRA	K15876	cytochrome c nitrite reductase small subunit	nrfH	MBE7432580.1 cytochrome c nitrite reductase small subunit [Anaerolineales bacterium]	1.15e-117	339
JLAFPPAO_02174	Carbon	Gluconeogenesis	K01610	phosphoenolpyruvate carboxykinase (ATP)	pckA	MBE7435467.1 phosphoenolpyruvate carboxykinase (ATP) [Anaerolineales bacterium]	0	1126
JLAFPPAO_02498	Carbon	Gluconeogenesis	K02446	fructose-1,6-bisphosphatase II	glpX	KAA0275190.1 class II fructose-bisphosphatase [Chloroflexi bacterium]	5.96e-229	634
JLAFPPAO_00558	Carbon	Glycolysis	K00873	pyruvate kinase	pyk	KAA0281348.1 pyruvate kinase [Chloroflexi bacterium]	0	938
JLAFPPAO_03037	Carbon	Glycolysis	K21071	ATP-dependent phosphofructokinase	pfk	MBE7432761.1 ATP-dependent 6-phosphofructokinase [Anaerolineales bacterium]	8.72e-291	796
JLAFPPAO_03260	Carbon	Glycolysis	K21071	ATP-dependent phosphofructokinase	pfk	KAA0273055.1 ATP-dependent 6-phosphofructokinase [Chloroflexi bacterium]	2.09e-256	706
JLAFPPAO_03587	Carbon	Glycolysis	K25026	glucokinase?	glk	MBE7435820.1 ROK family protein [Anaerolineales bacterium]	3.4e-226	627
JLAFPPAO_03463	Nitrogen	Nitrification	K10535	hydroxylamine dehydrogenase	hao	KXK48351.1 hydroxylamine oxidoreductase [Nitrosomonas europaea]	0	1208
JLAFPPAO_03519	Nitrogen	Nitrification	K10535	hydroxylamine dehydrogenase	hao	WP_090662114.1 hydroxylamine reductase [Nitrosomonas marina]	0	1105
JLAFPPAO_03635	Nitrogen	Nitrification	K10945	methane/ammonia monooxygenase subunit B	pmoB/amoB	WP_090334057.1 methane monooxygenase/ammonia monooxygenase subunit B [Nitrosomonas sp. Nm51]	9.4e-308	841
JLAFPPAO_03427	Nitrogen	Organic-N	K01426	amidase	amiE	KAA0270421.1 amidase [Chloroflexi bacterium]	0	935
JLAFPPAO_00321	Carbon	propionate production	K01848	methylmalonyl-CoA mutase, N-terminal domain	mcmA1	MBE7432607.1 methylmalonyl-CoA mutase family protein [Anaerolineales bacterium]	0	1079
JLAFPPAO_00750	Carbon	propionate production	K05606	methylmalonyl-CoA/ethylmalonyl-CoA epimerase	MCEE, epi	MBE7435116.1 methylmalonyl-CoA epimerase [Anaerolineales bacterium]	7.12e-90	266
JLAFPPAO_00819	Carbon	propionate production	K24012	acetate---CoA ligase (ADP-forming)	acdAB	MBE7436097.1 acetate--CoA ligase family protein [Anaerolineales bacterium]	0	1345
JLAFPPAO_01204	Carbon	propionate production	K01966	propionyl-CoA carboxylase beta chain	pccB	KAA0275407.1 acyl-CoA carboxylase subunit beta [Chloroflexi bacterium]	0	1036
JLAFPPAO_02124	Carbon	propionate production	K01849	methylmalonyl-CoA mutase, C-terminal domain	mcmA2	MBE7433850.1 cobalamin B12-binding domain-containing protein [Anaerolineales bacterium]	4.42e-90	267
JLAFPPAO_02177	Carbon	propionate production	K01848	methylmalonyl-CoA mutase, N-terminal domain	mcmA1	MBE7433700.1 methylmalonyl-CoA mutase family protein [Anaerolineales bacterium]	9.47999999825444e-315	865
JLAFPPAO_00532	Oxygen	ROS defense	K03671	thioredoxin 1	trxA	KAA0256752.1 thioredoxin [Chloroflexi bacterium]	1e-80	242
JLAFPPAO_00540	Oxygen	ROS defense	K04564	superoxide dismutase, Fe-Mn family	SOD2	MBE7436541.1 superoxide dismutase [Anaerolineales bacterium]	5.01e-147	416
JLAFPPAO_00850	Oxygen	ROS defense	K00384	thioredoxin reductase (NADPH)	trxB, TRR	MBE7436127.1 FAD-dependent oxidoreductase [Anaerolineales bacterium]	1.3e-296	812
JLAFPPAO_01149	Oxygen	ROS defense	K00384	thioredoxin reductase (NADPH)	trxB, TRR	MBE7433383.1 FAD-dependent oxidoreductase [Anaerolineales bacterium]	0	1079
JLAFPPAO_01276	Oxygen	ROS defense	K00384	thioredoxin reductase (NADPH)	trxB, TRR	KAA0284651.1 thioredoxin-disulfide reductase [Chloroflexi bacterium]	1.99e-224	622
JLAFPPAO_01524	Oxygen	ROS defense	K03671	thioredoxin 1	trxA	KAA0285473.1 DUF2892 domain-containing protein [Chloroflexi bacterium]	2.39e-117	338
JLAFPPAO_01818	Oxygen	ROS defense	K00428	cytochrome c peroxidase		MBE7432830.1 hypothetical protein [Anaerolineales bacterium]	5.79e-154	435
JLAFPPAO_02200	Oxygen	ROS defense	K11065	thioredoxin-dependent peroxiredoxin	tpx	MBE7434419.1 thiol peroxidase [Anaerolineales bacterium]	6.77e-121	348
JLAFPPAO_03446	Oxygen	ROS defense	K03671	thioredoxin 1	trxA	MBE7433513.1 thioredoxin [Anaerolineales bacterium]	2.76e-72	220
JLAFPPAO_00962	Oxygen	Terminal oxidase	K02274	cytochrome c oxidase subunit I	coxA, ctaD	MBE7434980.1 cbb3-type cytochrome c oxidase subunit I [Anaerolineales bacterium]	0	1263
JLAFPPAO_02743	Oxygen	Terminal oxidase	K02274	cytochrome c oxidase subunit I	coxA, ctaD	KAA0272768.1 cytochrome C oxidase subunit I [Chloroflexi bacterium]	0	1115
JLAFPPAO_02886	Oxygen	Terminal oxidase	K02274	cytochrome c oxidase subunit I	coxA, ctaD	KAA0270359.1 b(o/a)3-type cytochrome-c oxidase subunit 1 [Chloroflexi bacterium]	0	1124
JLAFPPAO_02889	Oxygen	Terminal oxidase	K00425	cytochrome bd ubiquinol oxidase subunit I	cydA	KAA0271683.1 cytochrome ubiquinol oxidase subunit I [Chloroflexi bacterium]	0	943
Extracellular carbohydrate-Active Enzyme
ORF	CAZy classes	evalue	bitscore	Activities
JLAFPPAO_00753	CBM50			Modules of approx. 50 residues found attached to various enzymes from families GH18, GH19, GH23, GH24, GH25 and GH73, i.e. enzymes cleaving either chitin or peptidoglycan. Binding to chitopentaose demonstrated in the case of Pteris ryukyuensis chitinase A [Ohnuma T et al. (2008) J. Biol. Chem. 283:5178-87 (PMID: 18083709)]. CBM50 modules are also found in a multitude of other enzymes targeting th…
JLAFPPAO_01385	CBM50			Modules of approx. 50 residues found attached to various enzymes from families GH18, GH19, GH23, GH24, GH25 and GH73, i.e. enzymes cleaving either chitin or peptidoglycan. Binding to chitopentaose demonstrated in the case of Pteris ryukyuensis chitinase A [Ohnuma T et al. (2008) J. Biol. Chem. 283:5178-87 (PMID: 18083709)]. CBM50 modules are also found in a multitude of other enzymes targeting th…
JLAFPPAO_01387	CBM50			Modules of approx. 50 residues found attached to various enzymes from families GH18, GH19, GH23, GH24, GH25 and GH73, i.e. enzymes cleaving either chitin or peptidoglycan. Binding to chitopentaose demonstrated in the case of Pteris ryukyuensis chitinase A [Ohnuma T et al. (2008) J. Biol. Chem. 283:5178-87 (PMID: 18083709)]. CBM50 modules are also found in a multitude of other enzymes targeting th…
JLAFPPAO_02792	GH13_7			α-amylase (EC 3.2.1.1); pullulanase (EC 3.2.1.41); cyclomaltodextrin glucanotransferase (EC 2.4.1.19); cyclomaltodextrinase (EC 3.2.1.54); trehalose-6-phosphate hydrolase (EC 3.2.1.93); oligo-α-glucosidase (EC 3.2.1.10); maltogenic amylase (EC 3.2.1.133); neopullulanase (EC 3.2.1.135); α-glucosidase (EC 3.2.1.20); maltotetraose-forming α-amylase (EC 3.2.1.60); isoamylase (EC 3.2.1.68); glucodextr…
JLAFPPAO_00908	GH135			α-1,4-galactosaminogalactan hydrolase (EC 3.2.1.-)
Extracellular peptidase
ORF	MEROPS Classification	evalue	bitscore	Catalytic type	MEROPS Name
JLAFPPAO_00753	M23.UPB			Metallo	subfamily M23B unassigned peptidases
JLAFPPAO_01385	M23.UPA			Metallo	subfamily M23A unassigned peptidases
JLAFPPAO_01387	M23.UPA			Metallo	subfamily M23A unassigned peptidases
JLAFPPAO_01550	M01.UPW			Metallo	family M1 unassigned peptidases
JLAFPPAO_02488	M01.UPW			Metallo	family M1 unassigned peptidases
JLAFPPAO_03261	M29.UPW			Metallo	family M29 unassigned peptidases
Transporter
ORF	TCID	evalue	bitscore	gene.product	Subfamily	Family	Fam_abbreviation	Superfamily	substrate
JLAFPPAO_00015	2.A.1.24.3	5.78e-162	464	gnl|TC-DB|A9WGR7|2.A.1.24.3 Permease of the major facilitator superfamily-like protein OS=Chloroflexus aurantiacus (strain ATCC 29366 / DSM 635 / J-10-fl) GN=Caur_3034 PE=4 SV=1	2.A.1.24	2.A.1	MFS	Major Facilitator (MFS) Superfamily	NA
JLAFPPAO_00016	3.A.5.1.1	1.2e-142	414	gnl|TC-DB|P0AGD7|3.A.5.1.1 Signal recognition particle protein - Escherichia coli.	3.A.5.1	3.A.5	Sec	Ankyrin Repeat Domain-containing (Ank) Superfamily	CHEBI:8526;protein polypeptide chain
JLAFPPAO_00072	3.A.1.3.8	1.18e-112	331	gnl|TC-DB|Q52812|3.A.1.3.8 General L-amino acid-binding periplasmic protein AAPJ precursor - Rhizobium leguminosarum (biovar viciae).	3.A.1.3	3.A.1	ABC	ABC1, ABC2, ABC3 Superfamilies	CHEBI:2642;alpha-amino acid
JLAFPPAO_00075	3.A.1.3.8	2.03e-117	335	gnl|TC-DB|Q52815|3.A.1.3.8 General L-amino acid transport ATP-binding protein aapP - Rhizobium leguminosarum (biovar viciae).	3.A.1.3	3.A.1	ABC	ABC1, ABC2, ABC3 Superfamilies	CHEBI:2642;alpha-amino acid
JLAFPPAO_00097	3.A.1.1.24	1.38e-117	347	gnl|TC-DB|Q72KX2|3.A.1.1.24 Glucose-binding protein - Thermus thermophilus (strain HB27 / ATCC BAA-163 / DSM 7039).	3.A.1.1	3.A.1	ABC	ABC1, ABC2, ABC3 Superfamilies	CHEBI:5418;glucose|CHEBI:14575;mannose
JLAFPPAO_00099	3.A.1.1.24	1.09e-107	312	gnl|TC-DB|Q72KX4|3.A.1.1.24 Sugar transport system permease protein - Thermus thermophilus (strain HB27 / ATCC BAA-163 / DSM 7039).	3.A.1.1	3.A.1	ABC	ABC1, ABC2, ABC3 Superfamilies	CHEBI:5418;glucose|CHEBI:14575;mannose
JLAFPPAO_00102	3.A.1.1.22	3.99e-151	430	gnl|TC-DB|Q9X103|3.A.1.1.22 Sugar ABC transporter, ATP-binding protein - Thermotoga maritima.	3.A.1.1	3.A.1	ABC	ABC1, ABC2, ABC3 Superfamilies	CHEBI:10202;alpha,alpha-trehalose|CHEBI:6668;maltose|CHEBI:6672;alpha-maltotriose|CHEBI:6671;maltotetraose
JLAFPPAO_00132	3.A.1.11.10	4.41e-104	311	gnl|TC-DB|Q3MAR5|3.A.1.11.10 Spermidine/putrescine import ATP-binding protein PotA OS=Anabaena variabilis (strain ATCC 29413 / PCC 7937) OX=240292 GN=potA PE=3 SV=1	3.A.1.11	3.A.1	ABC	ABC1, ABC2, ABC3 Superfamilies	CHEBI:51349;polyamine macromolecule|CHEBI:10651;sym-homospermidine
JLAFPPAO_00150	3.A.7.18.1	2.8e-141	414	gnl|TC-DB|Q9L714|3.A.7.18.1 CpaF OS=Caulobacter crescentus GN=cpaF PE=4 SV=1	NA	NA	NA	NA	CHEBI:27026;toxin
JLAFPPAO_00168	3.A.1.2.17	2.12e-165	478	gnl|TC-DB|A2RKA7|3.A.1.2.17 Purine/cytidine ABC transporter ATP-binding protein OS=Lactococcus lactis subsp. cremoris (strain MG1363) GN=nupA PE=4 SV=1	3.A.1.2	3.A.1	ABC	ABC1, ABC2, ABC3 Superfamilies	CHEBI:7647;nucleoside
JLAFPPAO_00238	3.A.11.1.5	4.17e-164	492	gnl|TC-DB|AKM80112|3.A.11.1.5 putative ATP-dependent DNA helicase [Candidatus Saccharibacteria bacterium GW2011_GWC2_44_17]	NA	NA	NA	NA	NA
JLAFPPAO_00270	1.A.33.1.2	6.37e-252	707	gnl|TC-DB|P0A6Y8|1.A.33.1.2 Chaperone protein dnaK - Escherichia coli.	NA	NA	NA	NA	CHEBI:24870;ion
JLAFPPAO_00289	3.A.11.1.5	2.13e-115	363	gnl|TC-DB|AKM80781.1|3.A.11.1.5 hypothetical protein UW38_C0001G0951 [Candidatus Saccharibacteria bacterium GW2011_GWC2_44_17]	NA	NA	NA	NA	NA
JLAFPPAO_00339	3.A.29.1.5	1.43e-186	540	gnl|TC-DB|P0AAI3|3.A.29.1.5 ATP-dependent zinc metalloprotease FtsH OS=Escherichia coli (strain K12) OX=83333 GN=ftsH PE=1 SV=1	3.A.29.1	3.A.29	MIMP	AAA-ATPase Superfamily	NA
JLAFPPAO_00438	3.A.3.2.21	6.36e-227	663	gnl|TC-DB|A9BJX0|3.A.3.2.21 Calcium-translocating P-type ATPase, PMCA-type OS=Petrotoga mobilis (strain DSM 10674 / SJ95) GN=Pmob_0991 PE=3 SV=1	3.A.3.2	3.A.3	P-ATPase	P-type ATPase (P-ATPase) Superfamily	CHEBI:3308;calcium(2+)
JLAFPPAO_00441	2.A.7.3.49	2.67e-145	445	gnl|TC-DB|D9SZH8|2.A.7.3.49 Peptidase S8 and S53 subtilisin kexin sedolisin OS=Micromonospora aurantiaca (strain ATCC 27029 / DSM 43813 / JCM 10878 / NBRC 16125 / INA 9442) GN=Micau_5747 PE=4 SV=1	2.A.7.3	2.A.7	DMT	Drug/Metabolite Transporter (DMT) Superfamily	CHEBI:7990;peptide
JLAFPPAO_00486	3.A.1.135.12	2.51e-154	456	gnl|TC-DB|KKK43437|3.A.1.135.12 putative multidrug export ATP-binding/permease protein [Lokiarchaeum sp. GC14_75]	3.A.1.135	3.A.1	ABC	ABC1, ABC2, ABC3 Superfamilies	NA
JLAFPPAO_00487	3.A.1.135.13	3.2e-165	485	gnl|TC-DB|Q66LJ0|3.A.1.135.13 Netropsin resistance protein subunit 2 OS=Streptomyces netropsis OX=55404 GN=netP2 PE=4 SV=1	3.A.1.135	3.A.1	ABC	ABC1, ABC2, ABC3 Superfamilies	CHEBI:22582;antimicrobial agent
JLAFPPAO_00491	2.A.3.14.1	8.23e-130	398	gnl|TC-DB|A4X503|2.A.3.14.1 Putative uncharacterized protein OS=Salinispora tropica (strain ATCC BAA-916 / DSM 44818 / CNB-440) GN=Strop_1487 PE=4 SV=1	2.A.3.14	2.A.3	APC	APC Superfamily	NA
JLAFPPAO_00515	3.A.9.1.2	6.9e-286	812	gnl|TC-DB|Q9FI56|3.A.9.1.2 Chaperone protein ClpC1, chloroplastic OS=Arabidopsis thaliana GN=CLPC1 PE=1 SV=1	3.A.9.1	3.A.9	CEPT or Tic-Toc	ATP-dependent Clp Protease (Clp) Superfamily	CHEBI:8526;protein polypeptide chain
JLAFPPAO_00549	3.A.10.2.2	6.53e-175	522	gnl|TC-DB|Q6BCL0|3.A.10.2.2 H+-pyrophosphatase - Streptomyces coelicolor.	NA	NA	NA	NA	CHEBI:5584;hydron
JLAFPPAO_00577	3.A.1.13.2	3.76e-130	376	gnl|TC-DB|A9WCZ6|3.A.1.13.2 Transport system permease protein OS=Chloroflexus aurantiacus (strain ATCC 29366 / DSM 635 / J-10-fl) GN=Caur_0314 PE=3 SV=1	3.A.1.13	3.A.1	ABC	ABC1, ABC2, ABC3 Superfamilies	CHEBI:30411;cobalamin
JLAFPPAO_00578	3.A.1.13.2	4.53e-144	416	gnl|TC-DB|A9WCZ4|3.A.1.13.2 Periplasmic binding protein OS=Chloroflexus aurantiacus (strain ATCC 29366 / DSM 635 / J-10-fl) GN=Caur_0312 PE=4 SV=1	3.A.1.13	3.A.1	ABC	ABC1, ABC2, ABC3 Superfamilies	CHEBI:30411;cobalamin
JLAFPPAO_00593	3.D.1.2.1	2.49e-150	439	gnl|TC-DB|P29925|3.D.1.2.1 NADH-ubiquinone oxidoreductase chain 13 (EC 1.6.5.3) (NADH dehydrogenase 1, chain 13) (NDH-1, chain 13) - Paracoccus denitrificans.	3.D.1.2	3.D.1	NDH	Iron-Sulfur Protein (ISP) Superfamily	CHEBI:5584;hydron
JLAFPPAO_00594	3.D.1.2.1	1.04e-128	397	gnl|TC-DB|P29924|3.D.1.2.1 NADH-ubiquinone oxidoreductase chain 12 (EC 1.6.5.3) (NADH dehydrogenase 1, chain 12) (NDH-1, chain 12) - Paracoccus denitrificans.	3.D.1.2	3.D.1	NDH	Iron-Sulfur Protein (ISP) Superfamily	CHEBI:5584;hydron
JLAFPPAO_00600	3.D.1.3.1	9.77e-129	377	gnl|TC-DB|Q56222|3.D.1.3.1 NADH-quinone oxidoreductase chain 1 (EC 1.6.99.5) (NADH dehydrogenase I, chain 1) (NDH-1, chain 1) - Thermus thermophilus.	3.D.1.3	3.D.1	NDH	Iron-Sulfur Protein (ISP) Superfamily	CHEBI:5584;hydron
JLAFPPAO_00602	3.D.1.5.1	8.17e-150	429	gnl|TC-DB|Q74GA5|3.D.1.5.1 NADH dehydrogenase I, D subunit - Geobacter sulfurreducens.	3.D.1.5	3.D.1	NDH	Iron-Sulfur Protein (ISP) Superfamily	CHEBI:5584;hydron
JLAFPPAO_00698	2.A.37.1.5	2.18e-136	410	gnl|TC-DB|P39830|2.A.37.1.5 Inner membrane protein ybaL OS=Escherichia coli (strain K12) GN=ybaL PE=1 SV=2	2.A.37.1	2.A.37	CPA2	CPA Superfamily	NA
JLAFPPAO_00744	9.B.115.1.2	1.53e-136	387	gnl|TC-DB|F0M2Z7|9.B.115.1.2 Putative membrane protein OS=Arthrobacter phenanthrenivorans (strain DSM 18606 / JCM 16027 / LMG 23796 / Sphe3) GN=Asphe3_09660 PE=4 SV=1	NA	NA	NA	NA	NA
JLAFPPAO_00770	9.B.18.2.1	8.19e-117	360	gnl|TC-DB|Q6MMD5|9.B.18.2.1 Nucleotide sugar epimerase/dehydratase OS=Bdellovibrio bacteriovorus (strain ATCC 15356 / DSM 50701 / NCIB 9529 / HD100) GN=wbpM PE=4 SV=1	NA	NA	NA	NA	NA
JLAFPPAO_00835	2.A.3.14.1	1.22e-134	410	gnl|TC-DB|A4X503|2.A.3.14.1 Putative uncharacterized protein OS=Salinispora tropica (strain ATCC BAA-916 / DSM 44818 / CNB-440) GN=Strop_1487 PE=4 SV=1	2.A.3.14	2.A.3	APC	APC Superfamily	NA
JLAFPPAO_00859	3.A.1.141.1	9.35e-105	309	gnl|TC-DB|P73329|3.A.1.141.1 ABC transporter OS=Synechocystis sp. (strain PCC 6803) GN=slr1901 PE=3 SV=1	3.A.1.141	3.A.1	ABC	ABC1, ABC2, ABC3 Superfamilies	CHEBI:6861;paraquat dichloride|CHEBI:3056;Benzyl viologen
JLAFPPAO_00873	3.A.2.3.2	1.12e-191	541	gnl|TC-DB|D3E1Z2|3.A.2.3.2 V-type ATP synthase beta chain OS=Methanobrevibacter ruminantium (strain ATCC 35063 / DSM 1093 / JCM 13430 / M1) GN=ahaB PE=3 SV=1	NA	NA	NA	NA	CHEBI:9175;sodium(1+)|CHEBI:5584;hydron
JLAFPPAO_00874	3.A.2.3.2	1.53e-239	672	gnl|TC-DB|D3E1Z1|3.A.2.3.2 V-type ATP synthase alpha chain OS=Methanobrevibacter ruminantium (strain ATCC 35063 / DSM 1093 / JCM 13430 / M1) GN=ahaA PE=3 SV=1	NA	NA	NA	NA	CHEBI:9175;sodium(1+)|CHEBI:5584;hydron
JLAFPPAO_00887	3.D.1.2.1	7.71e-119	358	gnl|TC-DB|P29925|3.D.1.2.1 NADH-ubiquinone oxidoreductase chain 13 (EC 1.6.5.3) (NADH dehydrogenase 1, chain 13) (NDH-1, chain 13) - Paracoccus denitrificans.	3.D.1.2	3.D.1	NDH	Iron-Sulfur Protein (ISP) Superfamily	CHEBI:5584;hydron
JLAFPPAO_00888	3.D.1.8.2	1.09e-139	424	gnl|TC-DB|Q8DKX9|3.D.1.8.2 NADH dehydrogenase subunit 5 OS=Thermosynechococcus elongatus (strain BP-1) OX=197221 GN=ndhF1 PE=1 SV=1	3.D.1.8	3.D.1	NDH	Iron-Sulfur Protein (ISP) Superfamily	CHEBI:24636;proton
JLAFPPAO_00919	3.A.1.33.1	1.08e-110	340	gnl|TC-DB|Q8R9L8|3.A.1.33.1 Putative ABC transporter ATP-binding protein TTE1589 OS=Thermoanaerobacter tengcongensis GN=TTE1589 PE=3 SV=1	3.A.1.33	3.A.1	ABC	ABC1, ABC2, ABC3 Superfamilies	CHEBI:1966;5'-S-methyl-5'-thioadenosine
JLAFPPAO_00931	3.A.3.2.21	1.5e-235	685	gnl|TC-DB|A9BJX0|3.A.3.2.21 Calcium-translocating P-type ATPase, PMCA-type OS=Petrotoga mobilis (strain DSM 10674 / SJ95) GN=Pmob_0991 PE=3 SV=1	3.A.3.2	3.A.3	P-ATPase	P-type ATPase (P-ATPase) Superfamily	CHEBI:3308;calcium(2+)
JLAFPPAO_00962	3.D.4.4.4	5.68e-157	462	gnl|TC-DB|Q8DHE9|3.D.4.4.4 Cytochrome c oxidase subunit 1 OS=Thermosynechococcus elongatus (strain BP-1) GN=ctaD PE=3 SV=1	NA	NA	NA	NA	CHEBI:5584;hydron
JLAFPPAO_01027	3.A.3.2.21	2.42e-233	682	gnl|TC-DB|A9BJX0|3.A.3.2.21 Calcium-translocating P-type ATPase, PMCA-type OS=Petrotoga mobilis (strain DSM 10674 / SJ95) GN=Pmob_0991 PE=3 SV=1	3.A.3.2	3.A.3	P-ATPase	P-type ATPase (P-ATPase) Superfamily	CHEBI:3308;calcium(2+)
JLAFPPAO_01194	3.A.1.11.9	1.77e-103	301	gnl|TC-DB|P0AFR9|3.A.1.11.9 Inner membrane ABC transporter permease protein YdcV OS=Escherichia coli (strain K12) GN=ydcV PE=1 SV=1	3.A.1.11	3.A.1	ABC	ABC1, ABC2, ABC3 Superfamilies	CHEBI:9218;spermidine|CHEBI:8650;putrescine|CHEBI:4705;double-stranded DNA
JLAFPPAO_01195	3.A.1.11.9	6.51e-105	308	gnl|TC-DB|P77156|3.A.1.11.9 Inner membrane ABC transporter permease protein YdcU OS=Escherichia coli (strain K12) GN=ydcU PE=1 SV=1	3.A.1.11	3.A.1	ABC	ABC1, ABC2, ABC3 Superfamilies	CHEBI:9218;spermidine|CHEBI:8650;putrescine|CHEBI:4705;double-stranded DNA
JLAFPPAO_01196	3.A.1.11.9	2.48e-129	372	gnl|TC-DB|P77795|3.A.1.11.9 Uncharacterized ABC transporter ATP-binding protein YdcT OS=Escherichia coli (strain K12) GN=ydcT PE=3 SV=1	3.A.1.11	3.A.1	ABC	ABC1, ABC2, ABC3 Superfamilies	CHEBI:9218;spermidine|CHEBI:8650;putrescine|CHEBI:4705;double-stranded DNA
JLAFPPAO_01197	3.A.1.11.9	5.85e-166	469	gnl|TC-DB|P76108|3.A.1.11.9 Putative ABC transporter periplasmic-binding protein YdcS OS=Escherichia coli (strain K12) GN=ydcS PE=3 SV=1	3.A.1.11	3.A.1	ABC	ABC1, ABC2, ABC3 Superfamilies	CHEBI:9218;spermidine|CHEBI:8650;putrescine|CHEBI:4705;double-stranded DNA
JLAFPPAO_01204	3.B.1.1.2	7.81e-229	639	gnl|TC-DB|Q57079|3.B.1.1.2 ALPHA-SUBUNIT,METHYLMALONYL-COA DECARBOXYLASE - Veillonella parvula.	3.B.1.1	3.B.1	NaT-DC	CPA Superfamily	CHEBI:9175;sodium(1+)
JLAFPPAO_01325	3.A.9.1.1	2.01e-255	718	gnl|TC-DB|Q02028|3.A.9.1.1 Stromal 70 kDa heat shock-related protein, chloroplast precursor - Pisum sativum (Garden pea).	3.A.9.1	3.A.9	CEPT or Tic-Toc	ATP-dependent Clp Protease (Clp) Superfamily	CHEBI:8526;protein polypeptide chain
JLAFPPAO_01381	3.D.1.5.1	5.54e-123	374	gnl|TC-DB|Q74GA3|3.D.1.5.1 NADH dehydrogenase I, F subunit - Geobacter sulfurreducens.	3.D.1.5	3.D.1	NDH	Iron-Sulfur Protein (ISP) Superfamily	CHEBI:5584;hydron
JLAFPPAO_01383	3.D.1.9.2	8.37e-125	381	gnl|TC-DB|P07658|3.D.1.9.2 Formate dehydrogenase H OS=Escherichia coli (strain K12) GN=fdhF PE=1 SV=2	3.D.1.9	3.D.1	NDH	Iron-Sulfur Protein (ISP) Superfamily	CHEBI:5584;hydron
JLAFPPAO_01407	3.A.7.18.1	6.08e-136	399	gnl|TC-DB|Q9L714|3.A.7.18.1 CpaF OS=Caulobacter crescentus GN=cpaF PE=4 SV=1	NA	NA	NA	NA	CHEBI:27026;toxin
JLAFPPAO_01442	3.A.1.106.3	2.14e-116	359	gnl|TC-DB|Q8G7R7|3.A.1.106.3 Probable permease protein of ABC transporter system OS=Bifidobacterium longum GN=BL0180 PE=3 SV=1	3.A.1.106	3.A.1	ABC	ABC1, ABC2, ABC3 Superfamilies	CHEBI:59062;polymyxin|CHEBI:135075;alphaprodine
JLAFPPAO_01462	3.A.3.5.15	9.79e-237	684	gnl|TC-DB|Q3MNJ6|3.A.3.5.15 Cation-transporting ATPase - Enterococcus faecium (Streptococcus faecium).	3.A.3.5	3.A.3	P-ATPase	P-type ATPase (P-ATPase) Superfamily	CHEBI:49551;copper(1+)
JLAFPPAO_01528	9.B.157.1.4	9.2e-113	331	gnl|TC-DB|Q8F2L2|9.B.157.1.4 Actin-like ATPase involved in cell morphogenesis OS=Leptospira interrogans serogroup Icterohaemorrhagiae serovar Lai (strain 56601) OX=189518 GN=mreB PE=4 SV=1	NA	NA	NA	NA	NA
JLAFPPAO_01542	2.A.1.2.88	4.67e-115	343	gnl|TC-DB|Q8TZJ0|2.A.1.2.88 Sucrose transport protein OS=Pyrococcus furiosus (strain ATCC 43587 / DSM 3638 / JCM 8422 / Vc1) GN=PF2002 PE=4 SV=1	2.A.1.2	2.A.1	MFS	Major Facilitator (MFS) Superfamily	NA
JLAFPPAO_01583	3.D.1.9.2	5.35e-157	471	gnl|TC-DB|P07658|3.D.1.9.2 Formate dehydrogenase H OS=Escherichia coli (strain K12) GN=fdhF PE=1 SV=2	3.D.1.9	3.D.1	NDH	Iron-Sulfur Protein (ISP) Superfamily	CHEBI:5584;hydron
JLAFPPAO_01585	3.D.1.5.1	2.22e-111	346	gnl|TC-DB|Q74GA3|3.D.1.5.1 NADH dehydrogenase I, F subunit - Geobacter sulfurreducens.	3.D.1.5	3.D.1	NDH	Iron-Sulfur Protein (ISP) Superfamily	CHEBI:5584;hydron
JLAFPPAO_01693	2.A.1.3.33	7.79e-104	320	gnl|TC-DB|O32182|2.A.1.3.33 Uncharacterized MFS-type transporter yusP OS=Bacillus subtilis GN=yusP PE=3 SV=1	2.A.1.3	2.A.1	MFS	Major Facilitator (MFS) Superfamily	CHEBI:2446;actinomycin D|CHEBI:7644;novobiocin|CHEBI:45745;streptomycin
JLAFPPAO_01790	3.A.12.1.5	8.13e-126	397	gnl|TC-DB|C0SP86|3.A.12.1.5 DNA translocase SftA OS=Bacillus subtilis (strain 168) GN=sftA PE=1 SV=1	NA	NA	NA	NA	CHEBI:4291;deoxyribonucleic acid
JLAFPPAO_01808	9.B.14.1.7	4.99e-109	343	gnl|TC-DB|Q9I3N2|9.B.14.1.7 Cytochrome c-type biogenesis protein CcmF OS=Pseudomonas aeruginosa (strain ATCC 15692 / PAO1 / 1C / PRS 101 / LMG 12228) GN=ccmF PE=3 SV=1	NA	NA	NA	NA	NA
JLAFPPAO_01914	8.A.7.1.1	1.04e-145	432	gnl|TC-DB|P08839|8.A.7.1.1 PHOSPHOENOLPYRUVATE-PROTEIN PHOSPHOTRANSFERASE (EC 2.7.3.9) (PHOSPHOTRANSFERASE SYSTEM, ENZYME I) - Escherichia coli.	NA	NA	NA	NA	NA
JLAFPPAO_01953	3.A.1.1.32	1.43e-114	342	gnl|TC-DB|Q55471|3.A.1.1.32 Slr0529 protein OS=Synechocystis sp. (strain PCC 6803) GN=slr0529 PE=4 SV=1	3.A.1.1	3.A.1	ABC	ABC1, ABC2, ABC3 Superfamilies	CHEBI:91033;1-O-(D-glucosyl)glycerol
JLAFPPAO_01955	3.A.1.1.32	9.56e-103	304	gnl|TC-DB|Q55473|3.A.1.1.32 Membrane bound sugar transport protein OS=Synechocystis sp. (strain PCC 6803) GN=slr0531 PE=3 SV=1	3.A.1.1	3.A.1	ABC	ABC1, ABC2, ABC3 Superfamilies	CHEBI:91033;1-O-(D-glucosyl)glycerol
JLAFPPAO_01994	4.A.5.1.7	3.4e-127	373	gnl|TC-DB|Q8Y9L9|4.A.5.1.7 Lmo0508 protein OS=Listeria monocytogenes serovar 1/2a (strain ATCC BAA-679 / EGD-e) GN=lmo0508 PE=4 SV=1	4.A.5.1	4.A.5	Gat	PTS-AG Superfamily	CHEBI:25899;pentitol
JLAFPPAO_02021	9.B.219.3.1	5.28e-149	445	gnl|TC-DB|WP_062422704.1|9.B.219.3.1 hypothetical protein [Leptolinea tardivitalis]	NA	NA	NA	NA	NA
JLAFPPAO_02036	3.A.1.135.6	2.1e-146	427	gnl|TC-DB|E8MFM3|3.A.1.135.6 Putative ABC transporter permease component OS=Bifidobacterium longum subsp. longum (strain ATCC 15707 / DSM 20219 / JCM 1217 / NCTC 11818 / E194b) GN=BLLJ_1836 PE=3 SV=1	3.A.1.135	3.A.1	ABC	ABC1, ABC2, ABC3 Superfamilies	CHEBI:5742;2'-(4-ethoxyphenyl)-5-(4-methylpiperazin-1-yl)-2,5'-bibenzimidazole|CHEBI:9474;tetracycline|CHEBI:4841;erythromycin A
JLAFPPAO_02120	2.A.5.5.10	2.56e-110	318	gnl|TC-DB|Q72FY4|2.A.5.5.10 ZIP zinc transporter family protein OS=Desulfovibrio vulgaris (strain ATCC 29579 / DSM 644 / NCIMB 8303 / VKM B-1760 / Hildenborough) OX=882 GN=DVU_0079 PE=4 SV=1	NA	NA	NA	NA	CHEBI:29033;iron(2+)|CHEBI:49972;zinc(2+)
JLAFPPAO_02148	3.A.1.5.12	3.68e-124	359	gnl|TC-DB|Q9X0F4|3.A.1.5.12 Oligopeptide ABC transporter, ATP-binding protein - Thermotoga maritima	3.A.1.5	3.A.1	ABC	ABC1, ABC2, ABC3 Superfamilies	CHEBI:26546;rhamnose
JLAFPPAO_02149	3.A.1.5.20	1.25e-135	387	gnl|TC-DB|P42065|3.A.1.5.20 Oligopeptide transport ATP-binding protein appF - Bacillus subtilis.	3.A.1.5	3.A.1	ABC	ABC1, ABC2, ABC3 Superfamilies	CHEBI:7755;oligopeptide
JLAFPPAO_02160	9.A.8.1.6	8.68e-111	345	gnl|TC-DB|Q7MV19|9.A.8.1.6 Ferrous iron transport protein B - Porphyromonas gingivalis (Bacteroides gingivalis).	NA	NA	NA	NA	CHEBI:29035;manganese(2+)
JLAFPPAO_02240	2.A.1.81.2	3.77e-102	309	gnl|TC-DB|B8GAU7|2.A.1.81.2 Major facilitator superfamily MFS_1 OS=Chloroflexus aggregans (strain MD-66 / DSM 9485) GN=Cagg_1787 PE=4 SV=1	2.A.1.81	2.A.1	MFS	Major Facilitator (MFS) Superfamily	CHEBI:29036;copper(2+)
JLAFPPAO_02246	3.A.1.5.47	4.59e-103	305	gnl|TC-DB|Q73NS6|3.A.1.5.47 Oligopeptide/dipeptide ABC transporter, ATP-binding protein OS=Treponema denticola (strain ATCC 35405 / CIP 103919 / DSM 14222) OX=243275 GN=TDE_1076 PE=3 SV=1	3.A.1.5	3.A.1	ABC	ABC1, ABC2, ABC3 Superfamilies	CHEBI:25906;peptide
JLAFPPAO_02333	3.A.12.1.1	7.29e-135	417	gnl|TC-DB|P21458|3.A.12.1.1 Stage III sporulation protein E - Bacillus subtilis.	NA	NA	NA	NA	CHEBI:4291;deoxyribonucleic acid
JLAFPPAO_02356	4.C.1.1.4	3.64e-112	345	gnl|TC-DB|P69451|4.C.1.1.4 Long-chain-fatty-acid--CoA ligase - Escherichia coli.	NA	NA	NA	NA	CHEBI:4984;fatty acid
JLAFPPAO_02369	9.A.76.1.8	1.32e-114	335	gnl|TC-DB|WP_090852276.1|9.A.76.1.8 fatty acid desaturase [Bacillus salsus]	NA	NA	NA	NA	CHEBI:24024;fatty acid
JLAFPPAO_02378	3.D.10.1.9	1.84e-225	636	gnl|TC-DB|I7FYK4|3.D.10.1.9 Succinate dehydrogenase flavoprotein subunit OS=Mycolicibacterium smegmatis (strain ATCC 700084 / mc(2)155) OX=246196 GN=sdhA PE=3 SV=1	3.D.10.1	3.D.10	SDH	Iron-Sulfur Protein (ISP) Superfamily	CHEBI:24636;proton|CHEBI:30031;succinate(2-)|CHEBI:29806;fumarate(2-)|CHEBI:10545;electron
JLAFPPAO_02379	3.D.10.1.9	5.65e-101	293	gnl|TC-DB|I7G4J1|3.D.10.1.9 Succinate dehydrogenase iron-sulfur protein subunit SdhB OS=Mycolicibacterium smegmatis (strain ATCC 700084 / mc(2)155) OX=246196 GN=sdhB PE=3 SV=1	3.D.10.1	3.D.10	SDH	Iron-Sulfur Protein (ISP) Superfamily	CHEBI:24636;proton|CHEBI:30031;succinate(2-)|CHEBI:29806;fumarate(2-)|CHEBI:10545;electron
JLAFPPAO_02392	3.A.9.1.2	8.13e-271	774	gnl|TC-DB|Q9FI56|3.A.9.1.2 Chaperone protein ClpC1, chloroplastic OS=Arabidopsis thaliana GN=CLPC1 PE=1 SV=1	3.A.9.1	3.A.9	CEPT or Tic-Toc	ATP-dependent Clp Protease (Clp) Superfamily	CHEBI:8526;protein polypeptide chain
JLAFPPAO_02467	3.D.7.2.4	4.34e-117	352	gnl|TC-DB|P60227|3.D.7.2.4 F420-non-reducing hydrogenase subunit A OS=Methanothermobacter marburgensis (strain ATCC BAA-927 / DSM 2133 / JCM 14651 / NBRC 100331 / OCM 82 / Marburg) OX=79929 GN=mvhA PE=1 SV=2	3.D.7.2	3.D.7	HHO	Iron-Sulfur Protein (ISP) Superfamily	NA
JLAFPPAO_02471	3.D.7.1.5	1.41e-199	576	gnl|TC-DB|OLS30725|3.D.7.1.5 CoB--CoM heterodisulfide reductase iron-sulfur subunit A [Candidatus Thorarchaeota archaeon AB_25]	3.D.7.1	3.D.7	HHO	Iron-Sulfur Protein (ISP) Superfamily	NA
JLAFPPAO_02517	1.C.82.1.2	1.93e-103	298	gnl|TC-DB|WP_078474522.1|1.C.82.1.2 50S ribosomal protein L1 [Snodgrassella alvi]	NA	NA	NA	NA	NA
JLAFPPAO_02587	2.A.63.1.2	4.97e-153	443	gnl|TC-DB|Q9KD98|2.A.63.1.2 Na+/H+ antiporter OS=Bacillus halodurans GN=BH1316 PE=3 SV=1	2.A.63.1	2.A.63	CPA3	Na+ Transporting Mrp (Mrp) Superfamily	CHEBI:9175;sodium(1+)|CHEBI:5584;hydron
JLAFPPAO_02590	2.A.63.1.4	2.23e-159	481	gnl|TC-DB|Q9K2S2|2.A.63.1.4 Na(+)/H(+) antiporter subunit A - Bacillus subtilis.	2.A.63.1	2.A.63	CPA3	Na+ Transporting Mrp (Mrp) Superfamily	CHEBI:9175;sodium(1+)|CHEBI:5584;hydron
JLAFPPAO_02602	3.A.1.106.9	1.13e-163	483	gnl|TC-DB|Q9KZE5|3.A.1.106.9 Putative ABC-transport protein OS=Streptomyces coelicolor (strain ATCC BAA-471 / A3(2) / M145) GN=ecaA PE=4 SV=1	3.A.1.106	3.A.1	ABC	ABC1, ABC2, ABC3 Superfamilies	CHEBI:2448;actinorhodin
JLAFPPAO_02621	3.A.1.103.5	1.17e-115	344	gnl|TC-DB|P72884|3.A.1.103.5 ABC transporter OS=Synechocystis sp. (strain PCC 6803 / Kazusa) GN=rfbB PE=4 SV=1	3.A.1.103	3.A.1	ABC	ABC1, ABC2, ABC3 Superfamilies	CHEBI:4879;ethanol|CHEBI:23008;carbohydrate
JLAFPPAO_02782	3.D.1.5.1	1.33e-115	348	gnl|TC-DB|Q74GA5|3.D.1.5.1 NADH dehydrogenase I, D subunit - Geobacter sulfurreducens.	3.D.1.5	3.D.1	NDH	Iron-Sulfur Protein (ISP) Superfamily	CHEBI:5584;hydron
JLAFPPAO_02799	2.A.59.1.2	3.86e-179	499	gnl|TC-DB|P45946|2.A.59.1.2 Hypothetical protein yqcL - Bacillus subtilis.	2.A.59.1	2.A.59	ACR3	BART Superfamily	CHEBI:2846;arsenite(3-)|CHEBI:30297;antimonite
JLAFPPAO_02886	3.D.4.2.1	1.89e-155	455	gnl|TC-DB|Q5SJ79|3.D.4.2.1 Cytochrome c oxidase subunit 1 - Thermus thermophilus (strain HB8 / ATCC 27634 / DSM 579).	NA	NA	NA	NA	CHEBI:5584;hydron|CHEBI:7860;dioxygen
JLAFPPAO_02889	3.D.4.3.2	3.77e-107	327	gnl|TC-DB|P0ABJ9|3.D.4.3.2 Cytochrome d ubiquinol oxidase subunit 1 OS=Escherichia coli (strain K12) GN=cydA PE=1 SV=1	NA	NA	NA	NA	CHEBI:5584;hydron
JLAFPPAO_03056	9.B.157.1.4	2.44e-107	316	gnl|TC-DB|Q8F2L2|9.B.157.1.4 Actin-like ATPase involved in cell morphogenesis OS=Leptospira interrogans serogroup Icterohaemorrhagiae serovar Lai (strain 56601) OX=189518 GN=mreB PE=4 SV=1	NA	NA	NA	NA	NA
JLAFPPAO_03058	3.A.2.1.2	3.38e-221	615	gnl|TC-DB|P29707|3.A.2.1.2 ATP synthase beta chain, sodium ion specific (EC 3.6.3.15) - Propionigenium modestum.	NA	NA	NA	NA	CHEBI:9175;sodium(1+)
JLAFPPAO_03060	3.A.2.1.10	1.75e-194	553	gnl|TC-DB|BAK19946|3.A.2.1.10 ApH+ATPase alpha subunit [Aphanothece halophytica]	NA	NA	NA	NA	NA
JLAFPPAO_03220	9.B.111.1.5	3.32e-105	334	gnl|TC-DB|WP_121250785|9.B.111.1.5 lysine--tRNA ligase [Solirubrobacter pauli]	9.B.111.1	9.B.111	LysS	Major Facilitator (MFS) Superfamily	NA
JLAFPPAO_03230	3.A.3.5.15	1.37e-117	374	gnl|TC-DB|Q3MNJ6|3.A.3.5.15 Cation-transporting ATPase - Enterococcus faecium (Streptococcus faecium).	3.A.3.5	3.A.3	P-ATPase	P-type ATPase (P-ATPase) Superfamily	CHEBI:49551;copper(1+)
JLAFPPAO_03275	3.B.1.1.5	5e-125	365	gnl|TC-DB|Q9V0A7|3.B.1.1.5 Methylmalonyl-CoA decarboxylase, beta subunit - Pyrococcus abyssi.	3.B.1.1	3.B.1	NaT-DC	CPA Superfamily	CHEBI:9175;sodium(1+)
JLAFPPAO_03277	3.B.1.1.5	1.07e-205	580	gnl|TC-DB|Q9V0A4|3.B.1.1.5 Methylmalonyl-CoA decarboxylase, subunit A LPHA (MMDA) - Pyrococcus abyssi.	3.B.1.1	3.B.1	NaT-DC	CPA Superfamily	CHEBI:9175;sodium(1+)
JLAFPPAO_03358	8.A.163.1.1	5.5e-118	367	gnl|TC-DB|P08238|8.A.163.1.1 Heat shock protein HSP 90-beta OS=Homo sapiens OX=9606 GN=HSP90AB1 PE=1 SV=4	NA	NA	NA	NA	CHEBI:14911;protein
JLAFPPAO_03395	3.D.4.10.1	9.55e-207	578	gnl|TC-DB|Q51663|3.D.4.10.1 Nitric oxide reductase, large subunit - Paracoccus denitrificans.	NA	NA	NA	NA	CHEBI:5584;hydron
JLAFPPAO_03562	2.A.1.21.2	1.98e-101	309	gnl|TC-DB|Q79VC7|2.A.1.21.2 2.A.1.21.2 MULTIDRUG RESISTANCE PROTEIN	2.A.1.21	2.A.1	MFS	Major Facilitator (MFS) Superfamily	CHEBI:9474;tetracycline
JLAFPPAO_03594	3.A.1.135.6	2.52e-138	410	gnl|TC-DB|E8MFM4|3.A.1.135.6 Putative ABC transporter permease component OS=Bifidobacterium longum subsp. longum (strain ATCC 15707 / DSM 20219 / JCM 1217 / NCTC 11818 / E194b) GN=BLLJ_1837 PE=3 SV=1	3.A.1.135	3.A.1	ABC	ABC1, ABC2, ABC3 Superfamilies	CHEBI:5742;2'-(4-ethoxyphenyl)-5-(4-methylpiperazin-1-yl)-2,5'-bibenzimidazole|CHEBI:9474;tetracycline|CHEBI:4841;erythromycin A
JLAFPPAO_03635	9.B.280.1.1	2.57e-116	345	gnl|TC-DB|G4SZ64|9.B.280.1.1 Particulate methane monooxygenase, B subunit OS=Methylomicrobium alcaliphilum (strain DSM 19304 / NCIMB 14124 / VKM B-2133 / 20Z) OX=1091494 GN=pmoB PE=4 SV=1	NA	NA	NA	NA	CHEBI:6811;methane

## Sheet: KSB01
ORF	Classification	Subclassification	k number	ko definition	ko name	blastp subject	blastp evalue	blastp bitscore
KGKHFNCM_01293	Carbon	acetate assimilation	K01895	acetyl-CoA synthetase	acs	KAA0221281.1 hypothetical protein EDS67_28635 [candidate division KSB1 bacterium]	7.19e-81	243
KGKHFNCM_02638	Carbon	acetate assimilation	K01895	acetyl-CoA synthetase	acs	RIK81798.1 acetate--CoA ligase [candidate division KSB1 bacterium]	0	1330
KGKHFNCM_02427	Carbon	Acetate fermentation	K01512	acylphosphatase	acyP	KAA0227127.1 acylphosphatase [candidate division KSB1 bacterium]	2.68e-58	183
KGKHFNCM_03246	Carbon	Acetate fermentation	K15024	putative phosphotransacetylase		NUM67607.1 phosphate propanoyltransferase [candidate division KSB1 bacterium]	3.84e-172	484
KGKHFNCM_04919	Carbon	Acetate fermentation	K00625	phosphate acetyltransferase	pta	KAA0230478.1 phosphate acetyltransferase [candidate division KSB1 bacterium]	2.12e-219	610
KGKHFNCM_01463	Carbon	Carbon fixation	K01601	ribulose-bisphosphate carboxylase large chain	cbbL	KAA0231316.1 hypothetical protein EDS67_03170 [candidate division KSB1 bacterium]	1.81e-284	780
KGKHFNCM_05340	Carbon	Carbon fixation	K08691	malyl-CoA/(S)-citramalyl-CoA lyase	mcl	HBV21536.1 CoA ester lyase [Nitrosomonas sp.]	9.31e-214	595
KGKHFNCM_05906	Carbon	Carbon fixation	K08691	malyl-CoA/(S)-citramalyl-CoA lyase	mcl	MBS0422943.1 CoA ester lyase [Proteobacteria bacterium]	5.29e-131	380
KGKHFNCM_02624	Nitrogen	Denitrification	K00376	nitrous-oxide reductase	nosZ	KAA0230795.1 Sec-dependent nitrous-oxide reductase [candidate division KSB1 bacterium]	0	1246
KGKHFNCM_02378	Nitrogen	DNRA	K03385	nitrite reductase (cytochrome c-552)	nrfA	KAA0227174.1 ammonia-forming cytochrome c nitrite reductase subunit c552 [candidate division KSB1 bacterium]	0	958
KGKHFNCM_02379	Nitrogen	DNRA	K15876	cytochrome c nitrite reductase small subunit	nrfH	NUM75247.1 cytochrome c nitrite reductase small subunit [candidate division KSB1 bacterium]	1.37e-112	325
KGKHFNCM_02450	Nitrogen	DNRA	K03385	nitrite reductase (cytochrome c-552)	nrfA	HFL05454.1 ammonia-forming cytochrome c nitrite reductase subunit c552 [Deltaproteobacteria bacterium]	1.07e-40	150
KGKHFNCM_02612	Nitrogen	DNRA/denitrification/nitrification	K00371	nitrate reductase / nitrite oxidoreductase, beta subunit	narH/nxrB	KAA0230784.1 nitrate oxidoreductase subunit beta [candidate division KSB1 bacterium]	0	885
KGKHFNCM_02614	Nitrogen	DNRA/denitrification/nitrification	K00370	nitrate reductase / nitrite oxidoreductase, alpha subunit	narG/nxrA	NUM74795.1 molybdopterin-dependent oxidoreductase [candidate division KSB1 bacterium]	0	2321
KGKHFNCM_03913	Carbon	formate oxidation	K00123	formate dehydrogenase major subunit	fdoG, fdhF, fdwA	KAA0230753.1 hypothetical protein EDS67_06910 [candidate division KSB1 bacterium]	3.08e-24	96.3
KGKHFNCM_05251	Carbon	formate oxidation	K00124	formate dehydrogenase iron-sulfur subunit	fdoH, fdsB	RIK79766.1 4Fe-4S ferredoxin [candidate division KSB1 bacterium]	3.41e-192	536
KGKHFNCM_03021	Carbon	Gluconeogenesis	K01610	phosphoenolpyruvate carboxykinase (ATP)	pckA	NUM73862.1 phosphoenolpyruvate carboxykinase [candidate division KSB1 bacterium]	0	1102
KGKHFNCM_04268	Carbon	Gluconeogenesis	K03841	fructose-1,6-bisphosphatase I	fbp	KAA0227723.1 class 1 fructose-bisphosphatase [candidate division KSB1 bacterium]	2.3e-245	676
KGKHFNCM_00281	Carbon	Glycolysis	K00886	polyphosphate glucokinase	ppgK	NUM73825.1 ROK family protein [candidate division KSB1 bacterium]	1.99e-172	485
KGKHFNCM_00737	Carbon	Glycolysis	K21071	ATP-dependent phosphofructokinase	pfk	KAA0228291.1 ATP-dependent 6-phosphofructokinase [candidate division KSB1 bacterium]	4.81e-265	729
KGKHFNCM_01488	Carbon	Glycolysis	K00873	pyruvate kinase	pyk	RIK61770.1 pyruvate kinase [candidate division KSB1 bacterium]	4.19e-303	833
KGKHFNCM_02947	Carbon	Glycolysis	K21071	ATP-dependent phosphofructokinase	pfk	KAA0225177.1 6-phosphofructokinase [candidate division KSB1 bacterium]	4.81e-242	669
KGKHFNCM_03040	Carbon	Glycolysis	K00850	6-phosphofructokinase 1	pfkA	NUM76368.1 6-phosphofructokinase [candidate division KSB1 bacterium]	9.76e-220	610
KGKHFNCM_04214	Carbon	Glycolysis	K25026	glucokinase?	glk	KAA0230573.1 ROK family protein [candidate division KSB1 bacterium]	4.95e-212	591
KGKHFNCM_04654	Carbon	Glycolysis	K25026	glucokinase?	glk	NUM73381.1 ROK family protein [candidate division KSB1 bacterium]	1.14e-220	613
KGKHFNCM_05378	Carbon	Glycolysis	K21071	ATP-dependent phosphofructokinase	pfk	KAA0221662.1 6-phosphofructokinase [candidate division KSB1 bacterium]	0	874
KGKHFNCM_00344	Carbon	propionate production	K01966	propionyl-CoA carboxylase beta chain	pccB	KAA0223864.1 methylmalonyl-CoA carboxyltransferase [candidate division KSB1 bacterium]	0	1025
KGKHFNCM_01654	Carbon	propionate production	K01849	methylmalonyl-CoA mutase, C-terminal domain	mcmA2	NUM76101.1 cobalamin B12-binding domain-containing protein [candidate division KSB1 bacterium]	2.39e-87	260
KGKHFNCM_01655	Carbon	propionate production	K01848	methylmalonyl-CoA mutase, N-terminal domain	mcmA1	NUM76100.1 methylmalonyl-CoA mutase family protein [candidate division KSB1 bacterium]	0	1093
KGKHFNCM_01716	Carbon	propionate production	K24012	acetate---CoA ligase (ADP-forming)	acdAB	RIK80938.1 acyl-CoA synthetase [candidate division KSB1 bacterium]	0	1356
KGKHFNCM_03222	Carbon	propionate production	K01848	methylmalonyl-CoA mutase, N-terminal domain	mcmA1	RIK75499.1 methylmalonyl-CoA mutase [candidate division KSB1 bacterium]	0	979
KGKHFNCM_04656	Carbon	propionate production	K05606	methylmalonyl-CoA/ethylmalonyl-CoA epimerase	MCEE, epi	RIK78293.1 methylmalonyl-CoA epimerase [candidate division KSB1 bacterium]	2.57e-88	263
KGKHFNCM_00271	Oxygen	ROS defense	K00384	thioredoxin reductase (NADPH)	trxB, TRR	KAA0229561.1 thioredoxin-disulfide reductase [candidate division KSB1 bacterium]	2.24e-224	621
KGKHFNCM_00437	Oxygen	ROS defense	K04565	superoxide dismutase, Cu-Zn family	SOD1	KAA0229737.1 superoxide dismutase family protein [candidate division KSB1 bacterium]	1.91e-117	340
KGKHFNCM_01120	Oxygen	ROS defense	K03671	thioredoxin 1	trxA	RIK71012.1 thioredoxin [candidate division KSB1 bacterium]	1.08e-69	213
KGKHFNCM_01790	Oxygen	ROS defense	K00384	thioredoxin reductase (NADPH)	trxB, TRR	KAA0227748.1 4Fe-4S dicluster domain-containing protein [candidate division KSB1 bacterium]	5.61e-289	798
KGKHFNCM_01793	Oxygen	ROS defense	K04564	superoxide dismutase, Fe-Mn family	SOD2	NUM76036.1 superoxide dismutase [candidate division KSB1 bacterium]	3.7e-173	486
KGKHFNCM_02024	Oxygen	ROS defense	K04564	superoxide dismutase, Fe-Mn family	SOD2	NUM76800.1 superoxide dismutase [candidate division KSB1 bacterium]	1.38e-157	444
KGKHFNCM_02466	Oxygen	ROS defense	K00384	thioredoxin reductase (NADPH)	trxB, TRR	KAA0231546.1 YpdA family putative bacillithiol disulfide reductase [candidate division KSB1 bacterium]	5.24e-247	681
KGKHFNCM_02541	Oxygen	ROS defense	K11065	thioredoxin-dependent peroxiredoxin	tpx	RIK75675.1 thiol peroxidase [candidate division KSB1 bacterium]	6.79e-120	345
KGKHFNCM_02917	Oxygen	ROS defense	K03782	catalase-peroxidase	katG	KAA0231684.1 catalase/peroxidase HPI [candidate division KSB1 bacterium]	0	1445
KGKHFNCM_02968	Oxygen	ROS defense	K03671	thioredoxin 1	trxA	RIK77085.1 thioredoxin [candidate division KSB1 bacterium]	9.96e-71	216
KGKHFNCM_05475	Oxygen	ROS defense	K03671	thioredoxin 1	trxA	KAA0223714.1 hypothetical protein EDS67_25460 [candidate division KSB1 bacterium]	1.3e-69	214
KGKHFNCM_05778	Oxygen	ROS defense	K03672	thioredoxin 2	trxC	OQW39821.1 thiol reductase thioredoxin [Proteobacteria bacterium SG_bin4]	1.2e-90	269
KGKHFNCM_00604	Oxygen	Terminal oxidase	K00404	cytochrome c oxidase cbb3-type subunit I	ccoN	TAK67363.1 cytochrome oxidase [Bacteriodetes bacterium]	1.4e-279	773
KGKHFNCM_02598	Oxygen	Terminal oxidase	K00425	cytochrome bd ubiquinol oxidase subunit I	cydA	KAA0223405.1 cytochrome ubiquinol oxidase subunit I [candidate division KSB1 bacterium]	9.41e-304	833
KGKHFNCM_03751	Oxygen	Terminal oxidase	K02274	cytochrome c oxidase subunit I	coxA, ctaD	RIK78639.1 cytochrome c oxidase subunit I [candidate division KSB1 bacterium]	0	1115
KGKHFNCM_04389	Oxygen	Terminal oxidase	K02274	cytochrome c oxidase subunit I	coxA, ctaD	KAA0226165.1 cytochrome c oxidase subunit I [candidate division KSB1 bacterium]	0	1238
Extracellular peptidase
ORF	MEROPS Classification	evalue	bitscore	Catalytic type	MEROPS Name
KGKHFNCM_02564	S08.UPB			Serine	subfamily S8B unassigned peptidases
KGKHFNCM_02846	M04.UPW			Metallo	family M4 unassigned peptidases
KGKHFNCM_04153	S09.UPC			Serine	subfamily S9C unassigned peptidases
KGKHFNCM_04575	S08.UPB			Serine	subfamily S8B unassigned peptidases
KGKHFNCM_05094	S08.017			Serine	bacillopeptidase F
KGKHFNCM_05538	S08.145			Serine	sporangin
Transporter
ORF	TCID	evalue	bitscore	gene.product	Subfamily	Family	Fam_abbreviation	Superfamily	substrate
KGKHFNCM_00273	8.A.163.1.1	1.79e-134	409	gnl|TC-DB|P08238|8.A.163.1.1 Heat shock protein HSP 90-beta OS=Homo sapiens OX=9606 GN=HSP90AB1 PE=1 SV=4	NA	NA	NA	NA	CHEBI:14911;protein
KGKHFNCM_00296	3.A.1.2.20	4.6e-140	423	gnl|TC-DB|G4FGN3|3.A.1.2.20 Monosaccharide-transporting ATPase OS=Thermotoga maritima (strain ATCC 43589 / MSB8 / DSM 3109 / JCM 10099) GN=ThemaDRAFT_1375 PE=3 SV=1	3.A.1.2	3.A.1	ABC	ABC1, ABC2, ABC3 Superfamilies	CHEBI:10085;xylose|CHEBI:5418;glucose
KGKHFNCM_00306	2.A.67.4.2	1.79e-103	328	gnl|TC-DB|O58099|2.A.67.4.2 Putative uncharacterized protein PH0361 OS=Pyrococcus horikoshii GN=PH0361 PE=4 SV=1	NA	NA	NA	NA	CHEBI:7755;oligopeptide
KGKHFNCM_00330	1.B.33.4.3	4.43e-154	473	gnl|TC-DB|WP_068837033.1|1.B.33.4.3 BamA/TamA family outer membrane protein [Pontibacter akesuensis]	1.B.33.4	1.B.33	OmpIP	Outer Membrane Pore-forming Protein I (OMPP-I) Superfamily	NA
KGKHFNCM_00344	3.B.1.1.2	4.61e-223	624	gnl|TC-DB|Q57079|3.B.1.1.2 ALPHA-SUBUNIT,METHYLMALONYL-COA DECARBOXYLASE - Veillonella parvula.	3.B.1.1	3.B.1	NaT-DC	CPA Superfamily	CHEBI:9175;sodium(1+)
KGKHFNCM_00347	1.A.35.3.2	2.13e-120	351	gnl|TC-DB|Q9WZ31|1.A.35.3.2 Magnesium transport protein CorA OS=Thermotoga maritima (strain ATCC 43589 / MSB8 / DSM 3109 / JCM 10099) GN=corA PE=1 SV=1	NA	NA	NA	NA	CHEBI:6635;magnesium(2+)|CHEBI:23337;cobalt(2+)
KGKHFNCM_00399	9.A.8.1.4	2.75e-169	501	gnl|TC-DB|Q5XPH7|9.A.8.1.4 Ferrous iron transport protein B - Leptospira biflexa serovar Patoc.	NA	NA	NA	NA	CHEBI:34754;iron(2+)
KGKHFNCM_00483	3.A.11.1.5	1.27e-108	347	gnl|TC-DB|AKM80781.1|3.A.11.1.5 hypothetical protein UW38_C0001G0951 [Candidatus Saccharibacteria bacterium GW2011_GWC2_44_17]	NA	NA	NA	NA	NA
KGKHFNCM_00492	3.A.1.132.10	3.68e-170	486	gnl|TC-DB|Q7NL23|3.A.1.132.10 Gll1303 protein OS=Gloeobacter violaceus (strain PCC 7421) GN=gll1303 PE=4 SV=1	3.A.1.132	3.A.1	ABC	ABC1, ABC2, ABC3 Superfamilies	NA
KGKHFNCM_00493	3.A.1.132.10	5.54e-130	385	gnl|TC-DB|Q7NL24|3.A.1.132.10 Gll1302 protein OS=Gloeobacter violaceus (strain PCC 7421) GN=gll1302 PE=4 SV=1	3.A.1.132	3.A.1	ABC	ABC1, ABC2, ABC3 Superfamilies	NA
KGKHFNCM_00568	2.A.8.1.6	2.79e-106	322	gnl|TC-DB|Q8EG39|2.A.8.1.6 Permease, GntP family - Shewanella oneidensis.	2.A.8.1	2.A.8	GntP	IT Superfamily	CHEBI:16659;D-glycerate
KGKHFNCM_00580	2.A.2.3.6	4.39e-112	337	gnl|TC-DB|A1S5F2|2.A.2.3.6 Sugar (Glycoside-Pentoside-Hexuronide) transporter OS=Shewanella amazonensis (strain ATCC BAA-1098 / SB2B) GN=Sama_1401 PE=4 SV=1	2.A.2.3	2.A.2	GPH	Major Facilitator (MFS) Superfamily	CHEBI:3522;cellobiose
KGKHFNCM_00596	2.A.21.3.19	8.19e-180	519	gnl|TC-DB|Q8AAV7|2.A.21.3.19 Na+/glucose cotransporter OS=Bacteroides thetaiotaomicron (strain ATCC 29148 / DSM 2079 / NCTC 10582 / E50 / VPI-5482) GN=BT_0355 PE=3 SV=1	2.A.21.3	2.A.21	SSS	APC Superfamily	CHEBI:22599;arabinose
KGKHFNCM_00599	3.A.3.5.19	9.27e-153	467	gnl|TC-DB|Q7A3E6|3.A.3.5.19 Copper-transporting ATPase copA - Staphylococcus aureus (strain N315).	3.A.3.5	3.A.3	P-ATPase	P-type ATPase (P-ATPase) Superfamily	CHEBI:49807;lead(2+)|CHEBI:23380;copper(2+)|CHEBI:34754;iron(2+)
KGKHFNCM_00779	3.A.5.1.4	1.6e-136	398	gnl|TC-DB|Q9X1I9|3.A.5.1.4 Protein translocase subunit SecY OS=Thermotoga maritima (strain ATCC 43589 / MSB8 / DSM 3109 / JCM 10099) OX=243274 GN=secY PE=1 SV=1	3.A.5.1	3.A.5	Sec	Ankyrin Repeat Domain-containing (Ank) Superfamily	CHEBI:14911;protein
KGKHFNCM_00909	3.A.5.1.1	4.24e-244	713	gnl|TC-DB|P10408|3.A.5.1.1 PREPROTEIN TRANSLOCASE SECA SUBUNIT - Escherichia coli.	3.A.5.1	3.A.5	Sec	Ankyrin Repeat Domain-containing (Ank) Superfamily	CHEBI:8526;protein polypeptide chain
KGKHFNCM_00999	9.B.174.1.3	2.04e-110	340	gnl|TC-DB|WP_014775235.1|9.B.174.1.3 S41 family peptidase [Alistipes finegoldii]	NA	NA	NA	NA	CHEBI:25906;peptide
KGKHFNCM_01107	3.A.1.6.1	3.34e-108	320	gnl|TC-DB|P16676|3.A.1.6.1 Sulfate transport ATP-binding protein cysA - Escherichia coli.	3.A.1.6	3.A.1	ABC	ABC1, ABC2, ABC3 Superfamilies	CHEBI:9335;sulfate|CHEBI:9569;thiosulfate(2-)
KGKHFNCM_01110	3.A.1.6.1	1.03e-153	434	gnl|TC-DB|P0AG78|3.A.1.6.1 Sulfate-binding protein - Escherichia coli.	3.A.1.6	3.A.1	ABC	ABC1, ABC2, ABC3 Superfamilies	CHEBI:9335;sulfate|CHEBI:9569;thiosulfate(2-)
KGKHFNCM_01129	2.A.47.1.1	2.28e-130	388	gnl|TC-DB|Q2FMC1|2.A.47.1.1 Anion transporter - Methanospirillum hungatei (strain JF-1 / DSM 864).	2.A.47.1	2.A.47	DASS	IT Superfamily	CHEBI:22563;anion
KGKHFNCM_01153	9.B.18.2.1	1.03e-134	409	gnl|TC-DB|Q6MMD5|9.B.18.2.1 Nucleotide sugar epimerase/dehydratase OS=Bdellovibrio bacteriovorus (strain ATCC 15356 / DSM 50701 / NCIB 9529 / HD100) GN=wbpM PE=4 SV=1	NA	NA	NA	NA	NA
KGKHFNCM_01248	9.B.14.1.7	1.04e-128	394	gnl|TC-DB|Q9I3N2|9.B.14.1.7 Cytochrome c-type biogenesis protein CcmF OS=Pseudomonas aeruginosa (strain ATCC 15692 / PAO1 / 1C / PRS 101 / LMG 12228) GN=ccmF PE=3 SV=1	NA	NA	NA	NA	NA
KGKHFNCM_01269	2.A.6.3.6	1.02e-169	524	gnl|TC-DB|Q8CX78|2.A.6.3.6 Acriflavine resistance protein (Cation efflux system) OS=Oceanobacillus iheyensis (strain DSM 14371 / JCM 11309 / KCTC 3954 / HTE831) GN=OB2940 PE=4 SV=1	2.A.6.3	2.A.6	RND	Resistance-Nodulation-Cell Division (RND) Superfamily	NA
KGKHFNCM_01279	2.A.6.3.6	1.29e-108	370	gnl|TC-DB|Q8CX78|2.A.6.3.6 Acriflavine resistance protein (Cation efflux system) OS=Oceanobacillus iheyensis (strain DSM 14371 / JCM 11309 / KCTC 3954 / HTE831) GN=OB2940 PE=4 SV=1	2.A.6.3	2.A.6	RND	Resistance-Nodulation-Cell Division (RND) Superfamily	NA
KGKHFNCM_01306	3.D.2.2.1	1.15e-106	318	gnl|TC-DB|P0C186|3.D.2.2.1 NAD(P) transhydrogenase subunit alpha part 1 - Rhodospirillum rubrum.	NA	NA	NA	NA	CHEBI:5584;hydron
KGKHFNCM_01308	3.D.2.2.1	3e-135	397	gnl|TC-DB|P0C188|3.D.2.2.1 NAD(P) transhydrogenase subunit beta - Rhodospirillum rubrum.	NA	NA	NA	NA	CHEBI:5584;hydron
KGKHFNCM_01318	2.A.6.1.7	1.14e-203	613	gnl|TC-DB|Q1DDM9|2.A.6.1.7 Heavy metal efflux pump, CzcA family OS=Myxococcus xanthus (strain DK 1622) GN=MXAN_0983 PE=4 SV=1	2.A.6.1	2.A.6	RND	Resistance-Nodulation-Cell Division (RND) Superfamily	CHEBI:10113;zinc(2+)
KGKHFNCM_01325	3.A.3.6.1	1.61e-168	500	gnl|TC-DB|P20021|3.A.3.6.1 PROBABLE CADMIUM-TRANSPORTING ATPASE (EC 3.6.3.3) (CADMIUM EFFLUX ATPASE) - Staphylococcus aureus.	3.A.3.6	3.A.3	P-ATPase	P-type ATPase (P-ATPase) Superfamily	CHEBI:3290;cadmium(2+)|CHEBI:49807;lead(2+)|CHEBI:10113;zinc(2+)|CHEBI:5584;hydron
KGKHFNCM_01327	2.A.6.1.13	1.67e-306	878	gnl|TC-DB|Q9RLI8|2.A.6.1.13 CzrA protein OS=Pseudomonas aeruginosa GN=czrA PE=4 SV=1	2.A.6.1	2.A.6	RND	Resistance-Nodulation-Cell Division (RND) Superfamily	CHEBI:3290;cadmium(2+)|CHEBI:10113;zinc(2+)
KGKHFNCM_01452	3.A.1.211.25	7.64e-109	341	gnl|TC-DB|ANC59923.1|3.A.1.211.25 OptrA [Enterococcus faecalis]	3.A.1.211	3.A.1	ABC	ABC1, ABC2, ABC3 Superfamilies	NA
KGKHFNCM_01475	9.B.174.1.2	1.21e-158	473	gnl|TC-DB|P23865|9.B.174.1.2 Tail-specific protease OS=Escherichia coli (strain K12) GN=prc PE=1 SV=2	NA	NA	NA	NA	NA
KGKHFNCM_01483	3.A.9.1.2	1.54e-248	719	gnl|TC-DB|Q9FI56|3.A.9.1.2 Chaperone protein ClpC1, chloroplastic OS=Arabidopsis thaliana GN=CLPC1 PE=1 SV=1	3.A.9.1	3.A.9	CEPT or Tic-Toc	ATP-dependent Clp Protease (Clp) Superfamily	CHEBI:8526;protein polypeptide chain
KGKHFNCM_01589	2.A.56.3.3	1.1e-143	417	gnl|TC-DB|Q8YSQ7|2.A.56.3.3 Alr3027 protein OS=Nostoc sp. (strain PCC 7120 / UTEX 2576) GN=alr3027 PE=4 SV=1	2.A.56.3	2.A.56	TRAP-T	IT Superfamily	CHEBI:3407;monocarboxylic acid anion|CHEBI:15361;pyruvate
KGKHFNCM_01611	2.A.6.2.33	2.95e-236	696	gnl|TC-DB|Q9HW27|2.A.6.2.33 Probable Resistance-Nodulation-Cell Division (RND) efflux transporter OS=Pseudomonas aeruginosa GN=PA4375 PE=4 SV=1	2.A.6.2	2.A.6	RND	Resistance-Nodulation-Cell Division (RND) Superfamily	CHEBI:3603;chloramphenicol|CHEBI:9474;tetracycline|CHEBI:87211;fluoroquinolone antibiotic|CHEBI:25106;macrolide
KGKHFNCM_01613	2.A.6.3.6	4.01e-189	574	gnl|TC-DB|Q8CX78|2.A.6.3.6 Acriflavine resistance protein (Cation efflux system) OS=Oceanobacillus iheyensis (strain DSM 14371 / JCM 11309 / KCTC 3954 / HTE831) GN=OB2940 PE=4 SV=1	2.A.6.3	2.A.6	RND	Resistance-Nodulation-Cell Division (RND) Superfamily	NA
KGKHFNCM_01628	2.A.37.1.1	2.04e-147	440	gnl|TC-DB|P03819|2.A.37.1.1 GLUTATHIONE-REGULATED POTASSIUM-EFFLUX SYSTEM PROTEIN KEFC (K(+)/H(+) ANTIPORTER) - Escherichia coli.	2.A.37.1	2.A.37	CPA2	CPA Superfamily	CHEBI:8345;potassium(1+)
KGKHFNCM_01642	2.A.6.1.8	0	1139	gnl|TC-DB|Q1DDM4|2.A.6.1.8 Cation efflux system protein CusA OS=Myxococcus xanthus (strain DK 1622) GN=MXAN_0988 PE=4 SV=1	2.A.6.1	2.A.6	RND	Resistance-Nodulation-Cell Division (RND) Superfamily	CHEBI:23380;copper(2+)
KGKHFNCM_01645	3.A.3.5.39	7.64e-280	793	gnl|TC-DB|AMR68964.1|3.A.3.5.39 heavy-metal transporting P-type ATPase [Bradyrhizobium liaoningense]	3.A.3.5	3.A.3	P-ATPase	P-type ATPase (P-ATPase) Superfamily	CHEBI:3290;cadmium(2+)|CHEBI:23379;copper(1+)|CHEBI:27365;zinc ion
KGKHFNCM_01690	2.A.130.1.1	8.3e-163	471	gnl|TC-DB|Q7MVV4|2.A.130.1.1 Response regulator OS=Porphyromonas gingivalis (strain ATCC BAA-308 / W83) OX=242619 GN=PG_0928 PE=4 SV=1	NA	NA	NA	NA	CHEBI:14911;protein
KGKHFNCM_01786	2.A.1.25.6	1.4e-159	464	gnl|TC-DB|KKY61289.1|2.A.1.25.6 beta-lactamase [Tannerella forsythia]	2.A.1.25	2.A.1	MFS	Major Facilitator (MFS) Superfamily	CHEBI:25906;peptide
KGKHFNCM_01837	3.A.1.106.2	1.48e-106	332	gnl|TC-DB|Q2G2M9|3.A.1.106.2 Putative multidrug export ATP-binding/permease protein SAOUHSC_02003 - Staphylococcus aureus (strain NCTC 8325).	3.A.1.106	3.A.1	ABC	ABC1, ABC2, ABC3 Superfamilies	CHEBI:9502;tetraphenylphosphonium|CHEBI:9948;verapamil|CHEBI:5742;2'-(4-ethoxyphenyl)-5-(4-methylpiperazin-1-yl)-2,5'-bibenzimidazole|CHEBI:9983;vincaleukoblastine|CHEBI:2496;doxorubicin|CHEBI:42478;ethidium
KGKHFNCM_01854	9.B.157.1.2	5.13e-128	369	gnl|TC-DB|Q9K8H5|9.B.157.1.2 Cell-shape determining protein OS=Bacillus halodurans (strain ATCC BAA-125 / DSM 18197 / FERM 7344 / JCM 9153 / C-125) GN=mreB PE=4 SV=1	NA	NA	NA	NA	CHEBI:5140;folic acid
KGKHFNCM_01920	3.D.1.2.1	1.75e-141	417	gnl|TC-DB|P29925|3.D.1.2.1 NADH-ubiquinone oxidoreductase chain 13 (EC 1.6.5.3) (NADH dehydrogenase 1, chain 13) (NDH-1, chain 13) - Paracoccus denitrificans.	3.D.1.2	3.D.1	NDH	Iron-Sulfur Protein (ISP) Superfamily	CHEBI:5584;hydron
KGKHFNCM_01921	3.D.1.3.1	3.93e-148	442	gnl|TC-DB|Q56227|3.D.1.3.1 NADH-quinone oxidoreductase chain 12 (EC 1.6.99.5) (NADH dehydrogenase I, chain 12) (NDH-1, chain 12) - Thermus thermophilus.	3.D.1.3	3.D.1	NDH	Iron-Sulfur Protein (ISP) Superfamily	CHEBI:5584;hydron
KGKHFNCM_02201	2.A.1.10.3	4.07e-105	316	gnl|TC-DB|P76417|2.A.1.10.3 Putative nucleoside transporter yegT OS=Escherichia coli (strain K12) GN=yegT PE=1 SV=1	2.A.1.10	2.A.1	MFS	Major Facilitator (MFS) Superfamily	CHEBI:24280;D-glucosyl group
KGKHFNCM_02319	3.A.1.103.5	1.19e-106	321	gnl|TC-DB|P72884|3.A.1.103.5 ABC transporter OS=Synechocystis sp. (strain PCC 6803 / Kazusa) GN=rfbB PE=4 SV=1	3.A.1.103	3.A.1	ABC	ABC1, ABC2, ABC3 Superfamilies	CHEBI:4879;ethanol|CHEBI:23008;carbohydrate
KGKHFNCM_02350	9.B.18.2.1	4.5e-133	401	gnl|TC-DB|Q6MMD5|9.B.18.2.1 Nucleotide sugar epimerase/dehydratase OS=Bdellovibrio bacteriovorus (strain ATCC 15356 / DSM 50701 / NCIB 9529 / HD100) GN=wbpM PE=4 SV=1	NA	NA	NA	NA	NA
KGKHFNCM_02366	2.A.6.3.6	4.1e-153	486	gnl|TC-DB|Q8CX78|2.A.6.3.6 Acriflavine resistance protein (Cation efflux system) OS=Oceanobacillus iheyensis (strain DSM 14371 / JCM 11309 / KCTC 3954 / HTE831) GN=OB2940 PE=4 SV=1	2.A.6.3	2.A.6	RND	Resistance-Nodulation-Cell Division (RND) Superfamily	NA
KGKHFNCM_02367	2.A.6.3.6	1.68e-118	388	gnl|TC-DB|Q8CX78|2.A.6.3.6 Acriflavine resistance protein (Cation efflux system) OS=Oceanobacillus iheyensis (strain DSM 14371 / JCM 11309 / KCTC 3954 / HTE831) GN=OB2940 PE=4 SV=1	2.A.6.3	2.A.6	RND	Resistance-Nodulation-Cell Division (RND) Superfamily	NA
KGKHFNCM_02447	3.A.3.2.29	1.44e-126	401	gnl|TC-DB|D5C355|3.A.3.2.29 ATPase, P-type (Transporting), HAD superfamily, subfamily IC OS=Nitrosococcus halophilus (strain Nc4) GN=Nhal_1826 PE=3 SV=1	3.A.3.2	3.A.3	P-ATPase	P-type ATPase (P-ATPase) Superfamily	CHEBI:3308;calcium(2+)
KGKHFNCM_02452	2.A.47.4.1	1.56e-129	392	gnl|TC-DB|P72958|2.A.47.4.1 Hypothetical 66.7 kDa protein SLL0640 - Synechocystis sp. (strain PCC 6803).	2.A.47.4	2.A.47	DASS	IT Superfamily	NA
KGKHFNCM_02463	9.A.8.1.5	9.82e-192	551	gnl|TC-DB|Q7MVL1|9.A.8.1.5 Ferrous iron transport protein B - Porphyromonas gingivalis (Bacteroides gingivalis).	NA	NA	NA	NA	CHEBI:34754;iron(2+)
KGKHFNCM_02472	3.D.1.5.1	2.69e-116	351	gnl|TC-DB|Q74GA5|3.D.1.5.1 NADH dehydrogenase I, D subunit - Geobacter sulfurreducens.	3.D.1.5	3.D.1	NDH	Iron-Sulfur Protein (ISP) Superfamily	CHEBI:5584;hydron
KGKHFNCM_02478	3.D.1.2.1	9.6e-142	411	gnl|TC-DB|P29913|3.D.1.2.1 NADH-UBIQUINONE OXIDOREDUCTASE CHAIN 1 (EC 1.6.5.3) (NADH DEHYDROGENASE 1, CHAIN 1) (NDH-1, CHAIN 1) - Paracoccus denitrificans.	3.D.1.2	3.D.1	NDH	Iron-Sulfur Protein (ISP) Superfamily	CHEBI:5584;hydron
KGKHFNCM_02490	3.D.1.5.1	4.54e-119	351	gnl|TC-DB|Q74GA5|3.D.1.5.1 NADH dehydrogenase I, D subunit - Geobacter sulfurreducens.	3.D.1.5	3.D.1	NDH	Iron-Sulfur Protein (ISP) Superfamily	CHEBI:5584;hydron
KGKHFNCM_02506	2.A.41.2.11	1.87e-113	338	gnl|TC-DB|Q9KPL5|2.A.41.2.11 Nucleoside permease OS=Vibrio cholerae serotype O1 (strain ATCC 39315 / El Tor Inaba N16961) GN=VC_2352 PE=1 SV=1	NA	NA	NA	NA	CHEBI:7647;nucleoside
KGKHFNCM_02507	2.A.3.3.22	1.53e-141	415	gnl|TC-DB|Q8R706|2.A.3.3.22 Amino acid transporters OS=Caldanaerobacter subterraneus subsp. tengcongensis (strain DSM 15242 / JCM 11007 / NBRC 100824 / MB4) GN=PotE6 PE=4 SV=1	2.A.3.3	2.A.3	APC	APC Superfamily	CHEBI:2642;alpha-amino acid
KGKHFNCM_02561	3.A.1.106.18	1.33e-156	462	gnl|TC-DB|Q72J05|3.A.1.106.18 Multidrug resistance ABC transporter ATP-binding and permease protein OS=Thermus thermophilus (strain HB27 / ATCC BAA-163 / DSM 7039) OX=262724 GN=TT_C0976 PE=1 SV=1	3.A.1.106	3.A.1	ABC	ABC1, ABC2, ABC3 Superfamilies	CHEBI:5742;2'-(4-ethoxyphenyl)-5-(4-methylpiperazin-1-yl)-2,5'-bibenzimidazole
KGKHFNCM_02562	3.A.1.106.17	1.27e-176	512	gnl|TC-DB|C1F8I9|3.A.1.106.17 Efflux ABC transporter, permease/ATP-binding protein OS=Acidobacterium capsulatum (strain ATCC 51196 / DSM 11244 / JCM 7670 / NBRC 15755 / NCIMB 13165 / 161) OX=240015 GN=ACP_0113 PE=4 SV=1	3.A.1.106	3.A.1	ABC	ABC1, ABC2, ABC3 Superfamilies	NA
KGKHFNCM_02587	2.A.36.6.11	7.07e-109	334	gnl|TC-DB|P76007|2.A.36.6.11 K(+)/H(+) antiporter NhaP2 OS=Escherichia coli (strain K12) GN=cvrA PE=1 SV=2	2.A.36.6	2.A.36	CPA1	CPA Superfamily	CHEBI:9175;sodium(1+)
KGKHFNCM_02590	2.A.81.1.3	1.08e-136	406	gnl|TC-DB|Q8NNI8|2.A.81.1.3 Uncharacterized transporter Cgl2211/cg2425 OS=Corynebacterium glutamicum (strain ATCC 13032 / DSM 20300 / JCM 1318 / LMG 3730 / NCIMB 10025) GN=Cgl2211 PE=3 SV=1	2.A.81.1	2.A.81	AAE	CPA Superfamily	CHEBI:30031;succinate(2-)
KGKHFNCM_02645	3.A.11.1.5	4.21e-155	464	gnl|TC-DB|AKM80112|3.A.11.1.5 putative ATP-dependent DNA helicase [Candidatus Saccharibacteria bacterium GW2011_GWC2_44_17]	NA	NA	NA	NA	NA
KGKHFNCM_02668	3.A.1.106.3	5.4e-124	383	gnl|TC-DB|Q8G7R7|3.A.1.106.3 Probable permease protein of ABC transporter system OS=Bifidobacterium longum GN=BL0180 PE=3 SV=1	3.A.1.106	3.A.1	ABC	ABC1, ABC2, ABC3 Superfamilies	CHEBI:59062;polymyxin|CHEBI:135075;alphaprodine
KGKHFNCM_02778	3.A.2.1.14	6.52e-228	636	gnl|TC-DB|P09219|3.A.2.1.14 ATP synthase subunit alpha OS=Bacillus sp. (strain PS3) OX=2334 GN=atpA PE=1 SV=1	NA	NA	NA	NA	CHEBI:5584;hydron
KGKHFNCM_02780	3.A.2.1.2	2.38e-231	641	gnl|TC-DB|P29707|3.A.2.1.2 ATP synthase beta chain, sodium ion specific (EC 3.6.3.15) - Propionigenium modestum.	NA	NA	NA	NA	CHEBI:9175;sodium(1+)
KGKHFNCM_02801	1.A.23.1.4	1.71e-139	415	gnl|TC-DB|M4V7W7|1.A.23.1.4 Uncharacterized protein OS=Bdellovibrio exovorus JSS GN=A11Q_300 PE=4 SV=1	NA	NA	NA	NA	NA
KGKHFNCM_02807	2.A.23.1.5	4e-101	306	gnl|TC-DB|O59010|2.A.23.1.5 425aa long hypothetical proton glutamate symport protein - Pyrococcus horikoshii.	NA	NA	NA	NA	CHEBI:22563;anion|CHEBI:29987;glutamate(2-)|CHEBI:29995;aspartate(2-)
KGKHFNCM_02837	3.A.3.2.29	8.91e-204	611	gnl|TC-DB|D5C355|3.A.3.2.29 ATPase, P-type (Transporting), HAD superfamily, subfamily IC OS=Nitrosococcus halophilus (strain Nc4) GN=Nhal_1826 PE=3 SV=1	3.A.3.2	3.A.3	P-ATPase	P-type ATPase (P-ATPase) Superfamily	CHEBI:3308;calcium(2+)
KGKHFNCM_02913	2.A.6.2.27	1.71e-104	353	gnl|TC-DB|Q9I6X4|2.A.6.2.27 Probable Resistance-Nodulation-Cell Division - Pseudomonas aeruginosa.	2.A.6.2	2.A.6	RND	Resistance-Nodulation-Cell Division (RND) Superfamily	CHEBI:29697;triclosan
KGKHFNCM_02938	3.A.5.2.2	4.56e-143	418	gnl|TC-DB|P66844|3.A.5.2.2 Signal recognition particle protein OS=Mycobacterium tuberculosis GN=ffh PE=3 SV=1	3.A.5.2	3.A.5	Sec	Ankyrin Repeat Domain-containing (Ank) Superfamily	CHEBI:8526;protein polypeptide chain
KGKHFNCM_02945	3.A.1.1.22	2.08e-156	443	gnl|TC-DB|Q9X103|3.A.1.1.22 Sugar ABC transporter, ATP-binding protein - Thermotoga maritima.	3.A.1.1	3.A.1	ABC	ABC1, ABC2, ABC3 Superfamilies	CHEBI:10202;alpha,alpha-trehalose|CHEBI:6668;maltose|CHEBI:6672;alpha-maltotriose|CHEBI:6671;maltotetraose
KGKHFNCM_02948	3.A.23.6.1	1.97e-112	329	gnl|TC-DB|B3ET62|3.A.23.6.1 Glyceraldehyde-3-phosphate dehydrogenase OS=Amoebophilus asiaticus (strain 5a2) GN=Aasi_1069 PE=3 SV=1	3.A.23.6	3.A.23	T6SS	ATP-dependent Clp Protease (Clp) Superfamily	NA
KGKHFNCM_03003	3.A.29.1.5	3.76e-212	608	gnl|TC-DB|P0AAI3|3.A.29.1.5 ATP-dependent zinc metalloprotease FtsH OS=Escherichia coli (strain K12) OX=83333 GN=ftsH PE=1 SV=1	3.A.29.1	3.A.29	MIMP	AAA-ATPase Superfamily	NA
KGKHFNCM_03014	3.D.1.2.1	5.8e-118	356	gnl|TC-DB|P29925|3.D.1.2.1 NADH-ubiquinone oxidoreductase chain 13 (EC 1.6.5.3) (NADH dehydrogenase 1, chain 13) (NDH-1, chain 13) - Paracoccus denitrificans.	3.D.1.2	3.D.1	NDH	Iron-Sulfur Protein (ISP) Superfamily	CHEBI:5584;hydron
KGKHFNCM_03015	3.D.1.8.2	6.94e-152	454	gnl|TC-DB|Q8DKX9|3.D.1.8.2 NADH dehydrogenase subunit 5 OS=Thermosynechococcus elongatus (strain BP-1) OX=197221 GN=ndhF1 PE=1 SV=1	3.D.1.8	3.D.1	NDH	Iron-Sulfur Protein (ISP) Superfamily	CHEBI:24636;proton
KGKHFNCM_03026	2.A.56.3.3	4.55e-106	315	gnl|TC-DB|Q8YSQ6|2.A.56.3.3 Extracellular solute-binding protein OS=Nostoc sp. (strain PCC 7120 / UTEX 2576) GN=all3028 PE=4 SV=1	2.A.56.3	2.A.56	TRAP-T	IT Superfamily	CHEBI:3407;monocarboxylic acid anion|CHEBI:15361;pyruvate
KGKHFNCM_03060	2.A.2.3.6	3.17e-106	322	gnl|TC-DB|A1S5F2|2.A.2.3.6 Sugar (Glycoside-Pentoside-Hexuronide) transporter OS=Shewanella amazonensis (strain ATCC BAA-1098 / SB2B) GN=Sama_1401 PE=4 SV=1	2.A.2.3	2.A.2	GPH	Major Facilitator (MFS) Superfamily	CHEBI:3522;cellobiose
KGKHFNCM_03065	2.A.21.3.8	1.8e-262	731	gnl|TC-DB|A1S2A8|2.A.21.3.8 Na+/solute symporter OS=Shewanella amazonensis (strain ATCC BAA-1098 / SB2B) GN=Sama_0303 PE=3 SV=1	2.A.21.3	2.A.21	SSS	APC Superfamily	CHEBI:14575;mannose
KGKHFNCM_03177	2.A.119.3.2	4.19e-112	324	gnl|TC-DB|I0AIM1|2.A.119.3.2 Putative selenocysteine protein OS=Ignavibacterium album (strain DSM 19864 / JCM 16511 / NBRC 101810 / Mat9-16) GN=IALB_1117 PE=4 SV=1	2.A.119.3	2.A.119	ArsP	Transporter-Opsin-G protein-coupled receptor (TOG) Superfamily	NA
KGKHFNCM_03183	5.A.3.5.1	9.73e-109	347	gnl|TC-DB|P37600|5.A.3.5.1 Thiosulfate reductase precursor (EC 1.-.-.-) - Salmonella typhimurium.	5.A.3.5	5.A.3	PMO	Iron-Sulfur Protein (ISP) Superfamily	CHEBI:10545;electron
KGKHFNCM_03207	1.H.3.3.2	6.17e-101	311	gnl|TC-DB|XP_001747976.1|1.H.3.3.2 hypothetical protein [Monosiga brevicollis MX1]	NA	NA	NA	NA	NA
KGKHFNCM_03256	2.A.39.3.14	8.45e-165	476	gnl|TC-DB|A8J166|2.A.39.3.14 Predicted protein OS=Chlamydomonas reinhardtii GN=CHLREDRAFT_191336 PE=4 SV=1	2.A.39.3	2.A.39	NCS1	APC Superfamily	CHEBI:2594;allantoin|CHEBI:2470;adenine|CHEBI:5563;guanine|CHEBI:9882;uracil
KGKHFNCM_03316	2.A.53.3.11	6.96e-112	344	gnl|TC-DB|P0AFR2|2.A.53.3.11 Putative sulfate transporter ychM OS=Escherichia coli (strain K12) GN=ychM PE=1 SV=2	2.A.53.3	2.A.53	SulP	APC Superfamily	CHEBI:30031;succinate(2-)|CHEBI:29806;fumarate(2-)|CHEBI:29995;aspartate(2-)|CHEBI:5589;hydrogencarbonate
KGKHFNCM_03330	3.A.1.2.19	3.01e-160	464	gnl|TC-DB|Q9X051|3.A.1.2.19 Ribose import ATP-binding protein RbsA 2 OS=Thermotoga maritima (strain ATCC 43589 / MSB8 / DSM 3109 / JCM 10099) GN=rbsA2 PE=3 SV=1	3.A.1.2	3.A.1	ABC	ABC1, ABC2, ABC3 Superfamilies	CHEBI:10410;beta-D-ribopyranose
KGKHFNCM_03487	2.A.68.1.2	2.2e-173	498	gnl|TC-DB|Q5F721|2.A.68.1.2 Antibiotic resistance efflux pump component - Neisseria gonorrhoeae (strain ATCC 700825 / FA 1090).	2.A.68.1	2.A.68	AbgT	IT Superfamily	CHEBI:23888;drug
KGKHFNCM_03551	8.A.7.1.1	1.64e-143	427	gnl|TC-DB|P08839|8.A.7.1.1 PHOSPHOENOLPYRUVATE-PROTEIN PHOSPHOTRANSFERASE (EC 2.7.3.9) (PHOSPHOTRANSFERASE SYSTEM, ENZYME I) - Escherichia coli.	NA	NA	NA	NA	NA
KGKHFNCM_03560	3.A.9.1.2	1.24e-288	820	gnl|TC-DB|Q9FI56|3.A.9.1.2 Chaperone protein ClpC1, chloroplastic OS=Arabidopsis thaliana GN=CLPC1 PE=1 SV=1	3.A.9.1	3.A.9	CEPT or Tic-Toc	ATP-dependent Clp Protease (Clp) Superfamily	CHEBI:8526;protein polypeptide chain
KGKHFNCM_03565	9.B.111.1.5	2.1e-118	369	gnl|TC-DB|WP_121250785|9.B.111.1.5 lysine--tRNA ligase [Solirubrobacter pauli]	9.B.111.1	9.B.111	LysS	Major Facilitator (MFS) Superfamily	NA
KGKHFNCM_03617	3.A.12.1.1	2.07e-140	433	gnl|TC-DB|P21458|3.A.12.1.1 Stage III sporulation protein E - Bacillus subtilis.	NA	NA	NA	NA	CHEBI:4291;deoxyribonucleic acid
KGKHFNCM_03693	2.A.1.6.13	5.36e-172	490	gnl|TC-DB|M1Q159|2.A.1.6.13 Acetate/monochloroacetate permease Deh4p OS=Dehalococcoides mccartyi DCMB5 GN=dcmb_1158 PE=4 SV=1	2.A.1.6	2.A.1	MFS	Major Facilitator (MFS) Superfamily	CHEBI:13704;acetate|CHEBI:23123;chloroacetate
KGKHFNCM_03751	3.D.4.4.4	1.15e-159	466	gnl|TC-DB|Q8DHE9|3.D.4.4.4 Cytochrome c oxidase subunit 1 OS=Thermosynechococcus elongatus (strain BP-1) GN=ctaD PE=3 SV=1	NA	NA	NA	NA	CHEBI:5584;hydron
KGKHFNCM_03948	8.A.151.1.1	3.02e-158	457	gnl|TC-DB|O43865|8.A.151.1.1 S-adenosylhomocysteine hydrolase-like protein 1 OS=Homo sapiens OX=9606 GN=AHCYL1 PE=1 SV=2	NA	NA	NA	NA	NA
KGKHFNCM_03970	1.B.14.12.3	1.23e-137	439	gnl|TC-DB|Q1DFM0|1.B.14.12.3 TonB-dependent receptor OS=Myxococcus xanthus (strain DK 1622) GN=MXAN_0272 PE=3 SV=1	1.B.14.12	1.B.14	OMR	Outer Membrane Pore-forming Protein I (OMPP-I) Superfamily	CHEBI:25367;molecule
KGKHFNCM_03981	3.A.1.1.51	9.37e-123	367	gnl|TC-DB|Q6MNM0|3.A.1.1.51 Maltose/maltodextrin transport permease homologue OS=Bdellovibrio bacteriovorus (strain ATCC 15356 / DSM 50701 / NCIB 9529 / HD100) GN=malF PE=3 SV=1	3.A.1.1	3.A.1	ABC	ABC1, ABC2, ABC3 Superfamilies	CHEBI:10202;alpha,alpha-trehalose|CHEBI:23489;alpha-cyclodextrin|CHEBI:62009;maltoheptaose heptasaccharide|CHEBI:6668;maltose|CHEBI:6672;alpha-maltotriose|CHEBI:6671;maltotetraose|CHEBI:61996;maltopentaose pentasaccharide
KGKHFNCM_03982	3.A.1.1.51	2.16e-124	376	gnl|TC-DB|Q6MNM0|3.A.1.1.51 Maltose/maltodextrin transport permease homologue OS=Bdellovibrio bacteriovorus (strain ATCC 15356 / DSM 50701 / NCIB 9529 / HD100) GN=malF PE=3 SV=1	3.A.1.1	3.A.1	ABC	ABC1, ABC2, ABC3 Superfamilies	CHEBI:10202;alpha,alpha-trehalose|CHEBI:23489;alpha-cyclodextrin|CHEBI:62009;maltoheptaose heptasaccharide|CHEBI:6668;maltose|CHEBI:6672;alpha-maltotriose|CHEBI:6671;maltotetraose|CHEBI:61996;maltopentaose pentasaccharide
KGKHFNCM_04025	2.A.56.1.5	2.43e-127	374	gnl|TC-DB|Q8ZKS0|2.A.56.1.5 Putative C4-dicarboxylate transport system OS=Salmonella typhimurium GN=STM4052 PE=4 SV=1	2.A.56.1	2.A.56	TRAP-T	IT Superfamily	NA
KGKHFNCM_04254	2.A.63.1.2	6.97e-166	478	gnl|TC-DB|Q9KD98|2.A.63.1.2 Na+/H+ antiporter OS=Bacillus halodurans GN=BH1316 PE=3 SV=1	2.A.63.1	2.A.63	CPA3	Na+ Transporting Mrp (Mrp) Superfamily	CHEBI:9175;sodium(1+)|CHEBI:5584;hydron
KGKHFNCM_04258	2.A.63.1.2	3.7e-155	471	gnl|TC-DB|Q7AJV8|2.A.63.1.2 Na+/H+ antiporter OS=Bacillus halodurans GN=BH1319 PE=3 SV=1	2.A.63.1	2.A.63	CPA3	Na+ Transporting Mrp (Mrp) Superfamily	CHEBI:9175;sodium(1+)|CHEBI:5584;hydron
KGKHFNCM_04389	3.D.4.4.4	5.98e-162	478	gnl|TC-DB|Q8DHE9|3.D.4.4.4 Cytochrome c oxidase subunit 1 OS=Thermosynechococcus elongatus (strain BP-1) GN=ctaD PE=3 SV=1	NA	NA	NA	NA	CHEBI:5584;hydron
KGKHFNCM_04486	1.A.33.1.4	1.68e-254	712	gnl|TC-DB|G4NXA5|1.A.33.1.4 Chaperone protein DnaK OS=Bacillus subtilis subsp. spizizenii TU-B-10 GN=dnaK PE=3 SV=1	NA	NA	NA	NA	NA
KGKHFNCM_04546	3.A.1.125.2	4.75e-122	390	gnl|TC-DB|Q7D911|3.A.1.125.2 Putative uncharacterized protein - Mycobacterium tuberculosis.	3.A.1.125	3.A.1	ABC	ABC1, ABC2, ABC3 Superfamilies	NA
KGKHFNCM_04630	2.A.6.2.33	6.65e-206	618	gnl|TC-DB|Q9HW27|2.A.6.2.33 Probable Resistance-Nodulation-Cell Division (RND) efflux transporter OS=Pseudomonas aeruginosa GN=PA4375 PE=4 SV=1	2.A.6.2	2.A.6	RND	Resistance-Nodulation-Cell Division (RND) Superfamily	CHEBI:3603;chloramphenicol|CHEBI:9474;tetracycline|CHEBI:87211;fluoroquinolone antibiotic|CHEBI:25106;macrolide
KGKHFNCM_04650	2.A.79.1.2	8.49e-133	387	gnl|TC-DB|Q1DBY8|2.A.79.1.2 Putative membrane protein OS=Myxococcus xanthus (strain DK 1622) GN=MXAN_1583 PE=4 SV=1	NA	NA	NA	NA	CHEBI:16857;L-threonine
KGKHFNCM_04669	9.B.146.1.6	2.18e-117	344	gnl|TC-DB|P0A6W3|9.B.146.1.6 Phospho-N-acetylmuramoyl-pentapeptide-transferase OS=Escherichia coli (strain K12) GN=mraY PE=1 SV=1	NA	NA	NA	NA	NA
KGKHFNCM_04698	3.A.3.7.2	2.46e-214	607	gnl|TC-DB|Q1M605|3.A.3.7.2 Potassium-transporting ATPase A chain OS=Rhizobium leguminosarum bv. viciae (strain 3841) GN=kdpA PE=3 SV=1	3.A.3.7	3.A.3	P-ATPase	P-type ATPase (P-ATPase) Superfamily	CHEBI:26216;potassium atom
KGKHFNCM_04739	2.A.6.3.6	2.43e-165	512	gnl|TC-DB|Q8CX78|2.A.6.3.6 Acriflavine resistance protein (Cation efflux system) OS=Oceanobacillus iheyensis (strain DSM 14371 / JCM 11309 / KCTC 3954 / HTE831) GN=OB2940 PE=4 SV=1	2.A.6.3	2.A.6	RND	Resistance-Nodulation-Cell Division (RND) Superfamily	NA
KGKHFNCM_04838	3.A.3.6.1	4.28e-196	572	gnl|TC-DB|P20021|3.A.3.6.1 PROBABLE CADMIUM-TRANSPORTING ATPASE (EC 3.6.3.3) (CADMIUM EFFLUX ATPASE) - Staphylococcus aureus.	3.A.3.6	3.A.3	P-ATPase	P-type ATPase (P-ATPase) Superfamily	CHEBI:3290;cadmium(2+)|CHEBI:49807;lead(2+)|CHEBI:10113;zinc(2+)|CHEBI:5584;hydron
KGKHFNCM_04865	2.A.21.3.2	1.06e-120	365	gnl|TC-DB|P96169|2.A.21.3.2 Sodium/glucose cotransporter (Na(+)/glucose symporter) - Vibrio parahaemolyticus.	2.A.21.3	2.A.21	SSS	APC Superfamily	CHEBI:9175;sodium(1+)|CHEBI:5418;glucose|CHEBI:5256;galactose
KGKHFNCM_04903	3.A.1.2.17	1.38e-125	377	gnl|TC-DB|A2RKA7|3.A.1.2.17 Purine/cytidine ABC transporter ATP-binding protein OS=Lactococcus lactis subsp. cremoris (strain MG1363) GN=nupA PE=4 SV=1	3.A.1.2	3.A.1	ABC	ABC1, ABC2, ABC3 Superfamilies	CHEBI:7647;nucleoside
KGKHFNCM_04959	1.B.14.6.12	8.25e-119	375	gnl|TC-DB|H6L5X3|1.B.14.6.12 TonB-dependent receptor plug OS=Saprospira grandis (strain Lewin) GN=SGRA_3817 PE=3 SV=1	1.B.14.6	1.B.14	OMR	Outer Membrane Pore-forming Protein I (OMPP-I) Superfamily	CHEBI:25367;molecule
KGKHFNCM_05062	9.B.142.2.20	2.56e-121	365	gnl|TC-DB|MBL7095498.1|9.B.142.2.20 glycosyltransferase family 39 protein [candidate division KSB1 bacterium]	9.B.142.2	9.B.142	GT39	Glycosyl/Acyl Transferase (GAT) Superfamily	NA
KGKHFNCM_05097	9.B.229.1.5	3.97e-205	596	gnl|TC-DB|G2SIT7|9.B.229.1.5 Glutamate carboxypeptidase II OS=Rhodothermus marinus SG0.5JP17-172 GN=Rhom172_0780 PE=4 SV=1	NA	NA	NA	NA	NA
KGKHFNCM_05118	2.A.111.1.2	3.32e-134	397	gnl|TC-DB|Q9K0M2|2.A.111.1.2 Putative uncharacterized protein OS=Neisseria meningitidis serogroup B (strain MC58) GN=NMB0570 PE=4 SV=1	2.A.111.1	2.A.111	NhaE	IT Superfamily	CHEBI:30143;lithium(1+)|CHEBI:9175;sodium(1+)|CHEBI:24636;proton
KGKHFNCM_05122	2.A.41.2.11	3.18e-111	332	gnl|TC-DB|Q9KPL5|2.A.41.2.11 Nucleoside permease OS=Vibrio cholerae serotype O1 (strain ATCC 39315 / El Tor Inaba N16961) GN=VC_2352 PE=1 SV=1	NA	NA	NA	NA	CHEBI:7647;nucleoside
KGKHFNCM_05146	3.A.1.135.10	1.5e-101	321	gnl|TC-DB|A4XGX1|3.A.1.135.10 ABC transporter related protein OS=Caldicellulosiruptor saccharolyticus (strain ATCC 43494 / DSM 8903 / Tp8T 6331) OX=351627 GN=Csac_0522 PE=4 SV=1	3.A.1.135	3.A.1	ABC	ABC1, ABC2, ABC3 Superfamilies	NA
KGKHFNCM_05234	1.B.14.6.2	1.95e-110	369	gnl|TC-DB|Q93TH9|1.B.14.6.2 Outer membrane protein Omp121 - Bacteroides fragilis.	1.B.14.6	1.B.14	OMR	Outer Membrane Pore-forming Protein I (OMPP-I) Superfamily	CHEBI:25367;molecule
KGKHFNCM_05298	3.A.29.1.5	1.14e-168	496	gnl|TC-DB|P0AAI3|3.A.29.1.5 ATP-dependent zinc metalloprotease FtsH OS=Escherichia coli (strain K12) OX=83333 GN=ftsH PE=1 SV=1	3.A.29.1	3.A.29	MIMP	AAA-ATPase Superfamily	NA
KGKHFNCM_05300	1.A.11.1.5	1.4e-107	324	gnl|TC-DB|O66515|1.A.11.1.5 Ammonia channel OS=Aquifex aeolicus (strain VF5) GN=amt PE=1 SV=1	NA	NA	NA	NA	CHEBI:7434;ammonia
KGKHFNCM_05350	2.A.8.1.8	3.9e-119	354	gnl|TC-DB|P0AC96|2.A.8.1.8 Low-affinity gluconate transporter OS=Escherichia coli (strain K12) GN=gntU PE=1 SV=1	2.A.8.1	2.A.8	GntP	IT Superfamily	CHEBI:24265;gluconate
KGKHFNCM_05373	2.A.6.3.1	4.68e-204	615	gnl|TC-DB|P25197|2.A.6.3.1 Nodulation protein nolG OS=Rhizobium meliloti GN=nolG PE=4 SV=2	2.A.6.3	2.A.6	RND	Resistance-Nodulation-Cell Division (RND) Superfamily	NA
KGKHFNCM_05582	2.A.22.4.2	1.37e-133	397	gnl|TC-DB|O67854|2.A.22.4.2 Transporter OS=Aquifex aeolicus GN=snf PE=1 SV=1	2.A.22.4	2.A.22	NSS	APC Superfamily	NA
KGKHFNCM_05817	3.A.1.120.8	2.93e-151	438	gnl|TC-DB|P9WQK3|3.A.1.120.8 Energy-dependent translational throttle protein EttA OS=Mycobacterium tuberculosis (strain ATCC 25618 / H37Rv) OX=83332 GN=ettA PE=1 SV=1	3.A.1.120	3.A.1	ABC	ABC1, ABC2, ABC3 Superfamilies	NA
KGKHFNCM_05873	3.A.4.1.1	1.79e-222	624	gnl|TC-DB|P08690|3.A.4.1.1 ARSENICAL PUMP-DRIVING ATPASE (EC 3.6.3.16) (ARSENITE-TRANSLOCATING ATPASE) (ARSENICAL RESISTANCE ATPASE) - Escherichia coli.	3.A.4.1	3.A.4	ArsAB	ArsA ATPase (ArsA) Superfamily	CHEBI:75861;arsenopyrite
KGKHFNCM_05882	2.A.1.2.60	5.38e-104	315	gnl|TC-DB|P77726|2.A.1.2.60 Inner membrane transport protein YajR OS=Escherichia coli (strain K12) GN=yajR PE=1 SV=2	2.A.1.2	2.A.1	MFS	Major Facilitator (MFS) Superfamily	NA

## Sheet: NTP02
ORF	Classification	Subclassification	k number	ko definition	ko name	blastp subject	blastp evalue	blastp bitscore
IBOJHJNA_01805	Carbon	acetate assimilation	K01895	acetyl-CoA synthetase	acs	HAP39727.1 acetate--CoA ligase [Nitrospira sp.]	0	879
IBOJHJNA_03486	Carbon	acetate assimilation	K01895	acetyl-CoA synthetase	acs	HAP38856.1 acetate--CoA ligase [Nitrospira sp.]	0	1292
IBOJHJNA_02234	Carbon	Acetate fermentation	K00925	acetate kinase	ackA	HAP40769.1 acetate/propionate family kinase [Nitrospira sp.]	4.65e-288	790
IBOJHJNA_02907	Carbon	Acetate fermentation	K01512	acylphosphatase	acyP	HAP40978.1 acylphosphatase [Nitrospira sp.]	7.8e-62	192
IBOJHJNA_01518	Carbon	Acetate formatation	K00156	pyruvate dehydrogenase (quinone)	poxB	HAP40256.1 pyruvate oxidase [Nitrospira sp.]	0	1167
IBOJHJNA_02013	Nitrogen	Assimilatory nitrate reduction	K00366	ferredoxin-nitrite reductase	nirA	HAP38805.1 ferredoxin--nitrite reductase [Nitrospira sp.]	0	1076
IBOJHJNA_00203	Carbon	Carbon fixation	K15231	ATP-citrate lyase beta-subunit	aclB	HAP40668.1 ATP citrate lyase [Nitrospira sp.]	4.14e-289	792
IBOJHJNA_02576	Carbon	Carbon fixation	K15230	ATP-citrate lyase alpha-subunit	aclA	HAP40667.1 ATP citrate lyase [Nitrospira sp.]	1.19e-253	711
IBOJHJNA_01046	Nitrogen	Denitrification	K00368	nitrite reductase (NO-forming)	nirK	HAP42128.1 nitrite reductase [Nitrospira sp.]	6.49e-235	648
IBOJHJNA_02702	Nitrogen	Denitrification	K00368	nitrite reductase (NO-forming)	nirK	HAP41782.1 nitrite reductase [Nitrospira sp.]	1.04e-238	658
IBOJHJNA_04096	Nitrogen	DNRA/denitrification/nitrification	K00370	nitrate reductase / nitrite oxidoreductase, alpha subunit	narG/nxrA	HAP39141.1 nitrate oxidoreductase subunit alpha [Nitrospira sp.]	0	2433
IBOJHJNA_04286	Nitrogen	DNRA/denitrification/nitrification	K00370	nitrate reductase / nitrite oxidoreductase, alpha subunit	narG/nxrA	MBA5876267.1 molybdopterin-dependent oxidoreductase [Nitrospira sp. CR1.2]	0	991
IBOJHJNA_04287	Nitrogen	DNRA/denitrification/nitrification	K00371	nitrate reductase / nitrite oxidoreductase, beta subunit	narH/nxrB	WP_080880460.1 nitrate oxidoreductase subunit beta [Nitrospira sp. ND1]	0	924
IBOJHJNA_00158	Carbon	formate oxidation	K00123	formate dehydrogenase major subunit	fdoG, fdhF, fdwA	WP_213041399.1 formate dehydrogenase subunit alpha [Nitrospira defluvii]	0	1749
IBOJHJNA_00159	Carbon	formate oxidation	K00124	formate dehydrogenase iron-sulfur subunit	fdoH, fdsB	HAP39028.1 formate dehydrogenase [Nitrospira sp.]	0	990
IBOJHJNA_03176	Carbon	formate oxidation	K05299	formate dehydrogenase (NADP+) alpha subunit	fdhA	WP_213040537.1 NADH-quinone oxidoreductase subunit NuoG [Nitrospira defluvii]	0	1699
IBOJHJNA_03400	Carbon	formate oxidation	K05299	formate dehydrogenase (NADP+) alpha subunit	fdhA	HAP38332.1 hypothetical protein [Nitrospira sp.]	0	1811
IBOJHJNA_03864	Carbon	formate oxidation	K21993	formate transporter	fdhC	HAP39135.1 formate transporter [Nitrospira sp.]	5.58e-204	568
IBOJHJNA_00899	Carbon	Gluconeogenesis	K03841	fructose-1,6-bisphosphatase I	fbp	HAP38990.1 class 1 fructose-bisphosphatase [Nitrospira sp.]	1.09e-242	669
IBOJHJNA_00521	Carbon	Glycolysis	K00873	pyruvate kinase	pyk	HAP38201.1 pyruvate kinase [Nitrospira sp.]	0	1238
IBOJHJNA_01142	Carbon	Glycolysis	K00850	6-phosphofructokinase 1	pfkA	WP_213041108.1 6-phosphofructokinase [Nitrospira defluvii]	0	1481
IBOJHJNA_01143	Carbon	Glycolysis	K00873	pyruvate kinase	pyk	WP_213041109.1 pyruvate kinase [Nitrospira defluvii]	0	903
IBOJHJNA_02623	Carbon	Glycolysis	K00845	glucokinase?	glk	HAP41925.1 glucokinase [Nitrospira sp.]	1.53e-258	712
IBOJHJNA_03035	Carbon	Glycolysis	K21071	ATP-dependent phosphofructokinase	pfk	HAP38279.1 6-phosphofructokinase [Nitrospira sp.]	2.2e-302	828
IBOJHJNA_02015	Nitrogen	Organic-N	K01725	cyanate lyase	cynS	MBP8116198.1 cyanase [Nitrospira sp.]	1.97e-95	281
IBOJHJNA_02856	Carbon	propionate assimilation	K01720	2-methylcitrate dehydratase	prpD	HAP39312.1 MmgE/PrpD family protein [Nitrospira sp.]	0	912
IBOJHJNA_02857	Carbon	propionate assimilation	K03417	methylisocitrate lyase	prpB	HAP39313.1 methylisocitrate lyase [Nitrospira sp.]	3.21e-205	572
IBOJHJNA_02849	Carbon	propionate production	K01848	methylmalonyl-CoA mutase, N-terminal domain	mcmA1	WP_213041690.1 methylmalonyl-CoA mutase family protein [Nitrospira defluvii]	0	1040
IBOJHJNA_02851	Carbon	propionate production	K01849	methylmalonyl-CoA mutase, C-terminal domain	mcmA2	HAP39307.1 methylmalonyl-CoA mutase [Nitrospira sp.]	3.95e-92	272
IBOJHJNA_01296	Oxygen	ROS defense	K00384	thioredoxin reductase (NADPH)	trxB, TRR	HAP42251.1 thioredoxin-disulfide reductase [Nitrospira sp.]	5.88e-217	602
IBOJHJNA_01405	Oxygen	ROS defense	K03676	glutaredoxin 3	grxC, GLRX, GLRX2	HHW76455.1 glutaredoxin 3 [Xanthomonadaceae bacterium]	6.05e-35	124
IBOJHJNA_01482	Oxygen	ROS defense	K04564	superoxide dismutase, Fe-Mn family	SOD2	WP_213041571.1 hypothetical protein [Nitrospira defluvii]	2.75e-145	413
IBOJHJNA_01752	Oxygen	ROS defense	K00428	cytochrome c peroxidase		HAP41274.1 cytochrome-c peroxidase [Nitrospira sp.]	1.38e-243	674
IBOJHJNA_01779	Oxygen	ROS defense	K03672	thioredoxin 2	trxC	HAP40529.1 thiol reductase thioredoxin [Nitrospira sp.]	5.92e-105	305
IBOJHJNA_02103	Oxygen	ROS defense	K03671	thioredoxin 1	trxA	WP_213043943.1 hypothetical protein [Nitrospira defluvii]	4.48e-63	196
IBOJHJNA_02896	Oxygen	ROS defense	K00432	glutathione peroxidase	gpx, btuE, bsaA	CAE6687817.1 Hydroperoxy fatty acid reductase gpx1 [Nitrospira defluvii]	7.92e-143	406
IBOJHJNA_03366	Oxygen	ROS defense	K11065	thioredoxin-dependent peroxiredoxin	tpx	WP_213040047.1 thiol peroxidase [Nitrospira defluvii]	1.45e-153	435
IBOJHJNA_03887	Oxygen	ROS defense	K03671	thioredoxin 1	trxA	WP_213043764.1 thioredoxin [Nitrospira defluvii]	6.53e-77	232
IBOJHJNA_04091	Oxygen	ROS defense	K00428	cytochrome c peroxidase		HAP38571.1 cytochrome-c peroxidase [Nitrospira sp.]	1.48e-263	724
IBOJHJNA_01342	Oxygen	Terminal oxidase	K00425	cytochrome bd ubiquinol oxidase subunit I	cydA	HAP40900.1 hypothetical protein [Nitrospira sp.]	0	1233
IBOJHJNA_01350	Oxygen	Terminal oxidase	K00425	cytochrome bd ubiquinol oxidase subunit I	cydA	WP_213042110.1 cytochrome ubiquinol oxidase subunit I [Nitrospira defluvii]	0	1268
IBOJHJNA_01536	Oxygen	Terminal oxidase	K00425	cytochrome bd ubiquinol oxidase subunit I	cydA	HAP40273.1 cytochrome ubiquinol oxidase subunit I [Nitrospira sp.]	0	877
IBOJHJNA_02563	Oxygen	Terminal oxidase	K00425	cytochrome bd ubiquinol oxidase subunit I	cydA	WP_213040292.1 cytochrome ubiquinol oxidase subunit I [Nitrospira defluvii]	0	1112
IBOJHJNA_02568	Oxygen	Terminal oxidase	K00425	cytochrome bd ubiquinol oxidase subunit I	cydA	HAP40947.1 hypothetical protein [Nitrospira sp.]	0	1233
Extracellular carbohydrate-Active Enzyme
ORF	CAZy classes	evalue	bitscore	Activities
IBOJHJNA_02300	CBM13			Modules of approx. 150 residues which always appear as a threefold internal repeat. The only apparent exception to this, xylanase II of Actinomadura sp. FC7 (GenBank U08894), is in fact not completely sequenced. These modules were first identified in several plant lectins such as ricin or agglutinin of Ricinus communis which bind galactose residues. The three-dimensional structure of a plant lect…
IBOJHJNA_00717	GH17			glucan endo-1,3-β-glucosidase (EC 3.2.1.39); licheninase (EC 3.2.1.73); ABA-specific β-glucosidase (EC 3.2.1.175); β-1,3-glucanosyltransglycosylase (EC 2.4.1.-); β-1,3-glucosidase (EC 3.2.1.-)
Extracellular peptidase
ORF	MEROPS Classification	evalue	bitscore	Catalytic type	MEROPS Name
IBOJHJNA_01224	M10.UPA			Metallo	subfamily M10A unassigned peptidases
Transporter
ORF	TCID	evalue	bitscore	gene.product	Subfamily	Family	Fam_abbreviation	Superfamily	substrate
IBOJHJNA_00027	1.A.104.1.1	6.26e-209	602	gnl|TC-DB|P76298|1.A.104.1.1 Flagellar biosynthesis protein FlhA OS=Escherichia coli (strain K12) GN=flhA PE=3 SV=1	NA	NA	NA	NA	CHEBI:9175;sodium(1+)
IBOJHJNA_00041	3.A.6.2.1	8.26e-140	407	gnl|TC-DB|P26465|3.A.6.2.1 FLAGELLUM-SPECIFIC ATP SYNTHASE (EC 3.6.1.34) - Salmonella typhimurium.	NA	NA	NA	NA	CHEBI:36080;protein
IBOJHJNA_00066	3.A.9.1.2	6.09e-247	714	gnl|TC-DB|Q9FI56|3.A.9.1.2 Chaperone protein ClpC1, chloroplastic OS=Arabidopsis thaliana GN=CLPC1 PE=1 SV=1	3.A.9.1	3.A.9	CEPT or Tic-Toc	ATP-dependent Clp Protease (Clp) Superfamily	CHEBI:8526;protein polypeptide chain
IBOJHJNA_00112	9.B.111.1.5	1.08e-127	392	gnl|TC-DB|WP_121250785|9.B.111.1.5 lysine--tRNA ligase [Solirubrobacter pauli]	9.B.111.1	9.B.111	LysS	Major Facilitator (MFS) Superfamily	NA
IBOJHJNA_00155	2.A.1.25.2	4.1e-126	373	gnl|TC-DB|P0AE16|2.A.1.25.2 Protein ampG - Escherichia coli.	2.A.1.25	2.A.1	MFS	Major Facilitator (MFS) Superfamily	CHEBI:7990;peptide|CHEBI:24396;glycopeptide
IBOJHJNA_00158	3.D.1.9.2	2.37e-163	494	gnl|TC-DB|P07658|3.D.1.9.2 Formate dehydrogenase H OS=Escherichia coli (strain K12) GN=fdhF PE=1 SV=2	3.D.1.9	3.D.1	NDH	Iron-Sulfur Protein (ISP) Superfamily	CHEBI:5584;hydron
IBOJHJNA_00159	3.D.1.5.1	1.27e-134	401	gnl|TC-DB|Q74GA3|3.D.1.5.1 NADH dehydrogenase I, F subunit - Geobacter sulfurreducens.	3.D.1.5	3.D.1	NDH	Iron-Sulfur Protein (ISP) Superfamily	CHEBI:5584;hydron
IBOJHJNA_00217	5.B.9.1.6	3.02e-205	573	gnl|TC-DB|D8PBH7|5.B.9.1.6 Uncharacterized protein OS=Nitrospira defluvii GN=NIDE0819 PE=4 SV=1	NA	NA	NA	NA	NA
IBOJHJNA_00277	9.B.146.1.6	1.01e-127	370	gnl|TC-DB|P0A6W3|9.B.146.1.6 Phospho-N-acetylmuramoyl-pentapeptide-transferase OS=Escherichia coli (strain K12) GN=mraY PE=1 SV=1	NA	NA	NA	NA	NA
IBOJHJNA_00287	2.A.114.1.5	3.72e-180	528	gnl|TC-DB|Q0P9Y2|2.A.114.1.5 Putative integral membrane protein (CstA homolog) OS=Campylobacter jejuni subsp. jejuni serotype O:2 (strain NCTC 11168) GN=cstA PE=4 SV=1	2.A.114.1	2.A.114	CstA	APC Superfamily	CHEBI:9742;tripeptide|CHEBI:4634;dipeptide
IBOJHJNA_00309	2.A.6.3.6	2.69e-168	521	gnl|TC-DB|Q8CX78|2.A.6.3.6 Acriflavine resistance protein (Cation efflux system) OS=Oceanobacillus iheyensis (strain DSM 14371 / JCM 11309 / KCTC 3954 / HTE831) GN=OB2940 PE=4 SV=1	2.A.6.3	2.A.6	RND	Resistance-Nodulation-Cell Division (RND) Superfamily	NA
IBOJHJNA_00391	2.A.20.1.1	2.5e-119	360	gnl|TC-DB|P0AFJ7|2.A.20.1.1 Low-affinity inorganic phosphate transporter 1 - Escherichia coli.	NA	NA	NA	NA	CHEBI:5584;hydron|CHEBI:7793;phosphate(3-)|CHEBI:30477;tellurite
IBOJHJNA_00404	1.B.9.1.3	1.79e-306	832	gnl|TC-DB|D8PJ38|1.B.9.1.3 Putative Porin OS=Candidatus Nitrospira defluvii GN=NIDE3592 PE=4 SV=1	1.B.9.1	1.B.9	FadL	Outer Membrane Pore-forming Protein I (OMPP-I) Superfamily	CHEBI:25367;molecule
IBOJHJNA_00415	9.B.241.1.2	1.7e-136	401	gnl|TC-DB|WP_035967890.1|9.B.241.1.2 hypothetical protein [Caballeronia grimmiae]	NA	NA	NA	NA	NA
IBOJHJNA_00427	3.D.4.10.1	6.67e-111	320	gnl|TC-DB|Q51664|3.D.4.10.1 Protein NorQ OS=Paracoccus denitrificans (strain Pd 1222) GN=norQ PE=3 SV=2	NA	NA	NA	NA	CHEBI:5584;hydron
IBOJHJNA_00435	3.D.1.1.1	4.75e-127	374	gnl|TC-DB|P31979|3.D.1.1.1 NADH dehydrogenase I chain F (EC 1.6.5.3) (NADH-ubiquinone oxidoreductase chain 6) (NUO6) - Escherichia coli.	3.D.1.1	3.D.1	NDH	Iron-Sulfur Protein (ISP) Superfamily	CHEBI:5584;hydron
IBOJHJNA_00494	3.A.9.1.2	1.24e-294	834	gnl|TC-DB|Q9FI56|3.A.9.1.2 Chaperone protein ClpC1, chloroplastic OS=Arabidopsis thaliana GN=CLPC1 PE=1 SV=1	3.A.9.1	3.A.9	CEPT or Tic-Toc	ATP-dependent Clp Protease (Clp) Superfamily	CHEBI:8526;protein polypeptide chain
IBOJHJNA_00508	2.A.111.2.1	1.17e-180	509	gnl|TC-DB|Q9F206|2.A.111.2.1 ORF428 protein OS=Roseateles depolymerans GN=ORF428 PE=4 SV=1	2.A.111.2	2.A.111	NhaE	IT Superfamily	NA
IBOJHJNA_00515	1.B.16.1.10	3.08e-186	530	gnl|TC-DB|D8PFV8|1.B.16.1.10 Putative Phosphate-selective porin OS=Candidatus Nitrospira defluvii GN=NIDE2435 PE=4 SV=1	1.B.16.1	1.B.16	SAP	Outer Membrane Pore-forming Protein I (OMPP-I) Superfamily	CHEBI:7793;phosphate(3-)
IBOJHJNA_00527	3.A.1.7.2	4.06e-104	303	gnl|TC-DB|P0C560|3.A.1.7.2 Phosphate import ATP-binding protein pstB - Mycobacterium smegmatis.	3.A.1.7	3.A.1	ABC	ABC1, ABC2, ABC3 Superfamilies	CHEBI:7793;phosphate(3-)
IBOJHJNA_00582	2.A.6.1.10	3.1e-308	881	gnl|TC-DB|Q1D665|2.A.6.1.10 Heavy metal efflux pump, CzcA family OS=Myxococcus xanthus (strain DK 1622) GN=MXAN_3671 PE=4 SV=1	2.A.6.1	2.A.6	RND	Resistance-Nodulation-Cell Division (RND) Superfamily	CHEBI:23380;copper(2+)
IBOJHJNA_00622	1.A.33.1.2	9.38e-273	760	gnl|TC-DB|P0A6Y8|1.A.33.1.2 Chaperone protein dnaK - Escherichia coli.	NA	NA	NA	NA	CHEBI:24870;ion
IBOJHJNA_00672	4.C.1.1.4	4.19e-122	370	gnl|TC-DB|P69451|4.C.1.1.4 Long-chain-fatty-acid--CoA ligase - Escherichia coli.	NA	NA	NA	NA	CHEBI:4984;fatty acid
IBOJHJNA_00698	9.B.222.1.2	1.96e-113	318	gnl|TC-DB|D8PGV6|9.B.222.1.2 Uncharacterized protein OS=Nitrospira defluvii GN=NIDE2788 PE=4 SV=1	NA	NA	NA	NA	NA
IBOJHJNA_00715	2.A.23.1.12	2.08e-130	382	gnl|TC-DB|Q8YZW3|2.A.23.1.12 Proton/sodium-glutamate symport protein OS=Nostoc sp. (strain PCC 7120 / SAG 25.82 / UTEX 2576) GN=all0342 PE=3 SV=1	NA	NA	NA	NA	CHEBI:33709;amino acid
IBOJHJNA_00765	3.A.29.1.5	8.7e-248	696	gnl|TC-DB|P0AAI3|3.A.29.1.5 ATP-dependent zinc metalloprotease FtsH OS=Escherichia coli (strain K12) OX=83333 GN=ftsH PE=1 SV=1	3.A.29.1	3.A.29	MIMP	AAA-ATPase Superfamily	NA
IBOJHJNA_00840	3.A.1.1.10	2.64e-115	338	gnl|TC-DB|Q9KWT9|3.A.1.1.10 AlgS - Sphingomonas sp.	3.A.1.1	3.A.1	ABC	ABC1, ABC2, ABC3 Superfamilies	CHEBI:271;alginic acid
IBOJHJNA_00881	3.A.15.2.1	3.31e-152	431	gnl|TC-DB|P24559|3.A.15.2.1 Twitching mobility protein - Pseudomonas aeruginosa.	NA	NA	NA	NA	NA
IBOJHJNA_00882	3.A.15.2.1	1.14e-129	377	gnl|TC-DB|Q51532|3.A.15.2.1 PILU (Twitching motility protein PILU) - Pseudomonas aeruginosa.	NA	NA	NA	NA	NA
IBOJHJNA_00950	3.A.1.106.20	2.32e-135	405	gnl|TC-DB|P63359|3.A.1.106.20 Lipid A export ATP-binding/permease protein MsbA OS=Salmonella typhimurium (strain LT2 / SGSC1412 / ATCC 700720) OX=99287 GN=msbA PE=1 SV=1	3.A.1.106	3.A.1	ABC	ABC1, ABC2, ABC3 Superfamilies	CHEBI:16247;phospholipid|CHEBI:25051;lipid As|CHEBI:6494;lipopolysaccharide|CHEBI:23888;drug
IBOJHJNA_01056	3.A.1.120.8	5.94e-208	589	gnl|TC-DB|P9WQK3|3.A.1.120.8 Energy-dependent translational throttle protein EttA OS=Mycobacterium tuberculosis (strain ATCC 25618 / H37Rv) OX=83332 GN=ettA PE=1 SV=1	3.A.1.120	3.A.1	ABC	ABC1, ABC2, ABC3 Superfamilies	NA
IBOJHJNA_01080	1.A.35.3.2	4.49e-113	332	gnl|TC-DB|Q9WZ31|1.A.35.3.2 Magnesium transport protein CorA OS=Thermotoga maritima (strain ATCC 43589 / MSB8 / DSM 3109 / JCM 10099) GN=corA PE=1 SV=1	NA	NA	NA	NA	CHEBI:6635;magnesium(2+)|CHEBI:23337;cobalt(2+)
IBOJHJNA_01152	3.D.1.9.1	2.28e-130	399	gnl|TC-DB|P23482|3.D.1.9.1 Hydrogenase-4 component B OS=Escherichia coli (strain K12) GN=hyfB PE=1 SV=2	3.D.1.9	3.D.1	NDH	Iron-Sulfur Protein (ISP) Superfamily	CHEBI:8345;potassium(1+)|CHEBI:5584;hydron
IBOJHJNA_01155	3.D.1.9.1	2.04e-101	314	gnl|TC-DB|P77437|3.D.1.9.1 Hydrogenase-4 component F OS=Escherichia coli (strain K12) GN=hyfF PE=3 SV=1	3.D.1.9	3.D.1	NDH	Iron-Sulfur Protein (ISP) Superfamily	CHEBI:8345;potassium(1+)|CHEBI:5584;hydron
IBOJHJNA_01225	2.A.7.3.24	4.21e-125	357	gnl|TC-DB|P96668|2.A.7.3.24 Uncharacterized transporter ydeK OS=Bacillus subtilis (strain 168) GN=ydeK PE=3 SV=1	2.A.7.3	2.A.7	DMT	Drug/Metabolite Transporter (DMT) Superfamily	NA
IBOJHJNA_01249	2.A.1.42.2	1.11e-129	423	gnl|TC-DB|Q89SS6|2.A.1.42.2 2-acylglycerophosphoethanolamine acyltransferase (EC 6.2.1.20) - Bradyrhizobium japonicum.	2.A.1.42	2.A.1	MFS	Major Facilitator (MFS) Superfamily	CHEBI:6606;monoacylglycerol phosphate
IBOJHJNA_01331	2.A.3.14.1	3.45e-151	451	gnl|TC-DB|A4X503|2.A.3.14.1 Putative uncharacterized protein OS=Salinispora tropica (strain ATCC BAA-916 / DSM 44818 / CNB-440) GN=Strop_1487 PE=4 SV=1	2.A.3.14	2.A.3	APC	APC Superfamily	NA
IBOJHJNA_01378	3.A.10.2.4	1.19e-222	636	gnl|TC-DB|Q8PYZ7|3.A.10.2.4 Pyrophosphate-energized proton pump 2 OS=Methanosarcina mazei GN=hppA2 PE=3 SV=1	NA	NA	NA	NA	CHEBI:9175;sodium(1+)
IBOJHJNA_01385	2.A.6.1.4	0	1345	gnl|TC-DB|P38054|2.A.6.1.4 Putative cation efflux system protein cusA - Escherichia coli.	2.A.6.1	2.A.6	RND	Resistance-Nodulation-Cell Division (RND) Superfamily	CHEBI:49551;copper(1+)|CHEBI:49468;silver(1+)
IBOJHJNA_01442	1.W.5.1.4	0	899	gnl|TC-DB|WP_123237503.1|1.W.5.1.4 phage portal protein [Pseudomethylobacillus aquaticus]	1.W.5.1	1.W.5	PPP5	Phage Portal Protein (PPP) Superfamily	NA
IBOJHJNA_01539	1.B.72.2.1	2.68e-198	547	gnl|TC-DB|D8PE63|1.B.72.2.1 Uncharacterized protein OS=Candidatus Nitrospira defluvii GN=NIDE1793 PE=4 SV=1	1.B.72.2	1.B.72	PomS/T	Outer Membrane Pore-forming Protein I (OMPP-I) Superfamily	NA
IBOJHJNA_01553	3.A.1.106.18	3.01e-116	356	gnl|TC-DB|Q72J05|3.A.1.106.18 Multidrug resistance ABC transporter ATP-binding and permease protein OS=Thermus thermophilus (strain HB27 / ATCC BAA-163 / DSM 7039) OX=262724 GN=TT_C0976 PE=1 SV=1	3.A.1.106	3.A.1	ABC	ABC1, ABC2, ABC3 Superfamilies	CHEBI:5742;2'-(4-ethoxyphenyl)-5-(4-methylpiperazin-1-yl)-2,5'-bibenzimidazole
IBOJHJNA_01653	3.A.1.201.8	9.7e-122	372	gnl|TC-DB|Q0WML0|3.A.1.201.8 Antigen peptide transporter-like 2 - Arabidopsis thaliana (Mouse-ear cress).	3.A.1.201	3.A.1	ABC	ABC1, ABC2, ABC3 Superfamilies	CHEBI:49470;aluminium(3+)
IBOJHJNA_01655	3.A.3.2.21	2.69e-242	702	gnl|TC-DB|A9BJX0|3.A.3.2.21 Calcium-translocating P-type ATPase, PMCA-type OS=Petrotoga mobilis (strain DSM 10674 / SJ95) GN=Pmob_0991 PE=3 SV=1	3.A.3.2	3.A.3	P-ATPase	P-type ATPase (P-ATPase) Superfamily	CHEBI:3308;calcium(2+)
IBOJHJNA_01663	3.A.3.4.2	1.28e-296	837	gnl|TC-DB|Q72RN5|3.A.3.4.2 Magnesium transport P-type atpase OS=Leptospira interrogans serogroup Icterohaemorrhagiae serovar copenhageni GN=mgtB PE=3 SV=1	3.A.3.4	3.A.3	P-ATPase	P-type ATPase (P-ATPase) Superfamily	CHEBI:6635;magnesium(2+)
IBOJHJNA_01664	2.A.6.1.13	9.37e-292	840	gnl|TC-DB|Q9RLI8|2.A.6.1.13 CzrA protein OS=Pseudomonas aeruginosa GN=czrA PE=4 SV=1	2.A.6.1	2.A.6	RND	Resistance-Nodulation-Cell Division (RND) Superfamily	CHEBI:3290;cadmium(2+)|CHEBI:10113;zinc(2+)
IBOJHJNA_01685	2.A.1.59.2	1.65e-117	346	gnl|TC-DB|B2JBG5|2.A.1.59.2 Major facilitator superfamily MFS_1 OS=Nostoc punctiforme (strain ATCC 29133 / PCC 73102) GN=Npun_BF137 PE=4 SV=1	2.A.1.59	2.A.1	MFS	Major Facilitator (MFS) Superfamily	NA
IBOJHJNA_01690	3.A.3.1.8	1.44e-227	667	gnl|TC-DB|Q2FLJ9|3.A.3.1.8 ATPase, E1-E2 type OS=Methanospirillum hungatei (strain JF-1 / DSM 864) GN=Mhun_0636 PE=4 SV=1	3.A.3.1	3.A.3	P-ATPase	P-type ATPase (P-ATPase) Superfamily	CHEBI:9175;sodium(1+)|CHEBI:8345;potassium(1+)
IBOJHJNA_01832	3.A.15.4.1	3.4e-118	361	gnl|TC-DB|Q8F3M7|3.A.15.4.1 Type II secretory pathway ATPase protein E OS=Leptospira interrogans serogroup Icterohaemorrhagiae serovar Lai (strain 56601) GN=gspE PE=4 SV=1	NA	NA	NA	NA	CHEBI:8526;protein polypeptide chain
IBOJHJNA_01915	1.B.3.1.10	0	924	gnl|TC-DB|D8PC30|1.B.3.1.10 Putative uncharacterized protein OS=Candidatus Nitrospira defluvii GN=NIDE1028 PE=4 SV=1	1.B.3.1	1.B.3	SP	Outer Membrane Pore-forming Protein I (OMPP-I) Superfamily	NA
IBOJHJNA_01930	9.B.157.1.4	1.83e-145	414	gnl|TC-DB|Q8F2L2|9.B.157.1.4 Actin-like ATPase involved in cell morphogenesis OS=Leptospira interrogans serogroup Icterohaemorrhagiae serovar Lai (strain 56601) OX=189518 GN=mreB PE=4 SV=1	NA	NA	NA	NA	NA
IBOJHJNA_01948	1.B.14.1.30	1.13e-122	381	gnl|TC-DB|P72609|1.B.14.1.30 Ferrichrome-iron receptor OS=Synechocystis sp. (strain PCC 6803 / Kazusa) OX=1111708 GN=fhuA PE=3 SV=1	1.B.14.1	1.B.14	OMR	Outer Membrane Pore-forming Protein I (OMPP-I) Superfamily	CHEBI:84734;Fe(III)-complexed siderophore
IBOJHJNA_01956	1.B.14.1.30	2.33e-132	415	gnl|TC-DB|P72609|1.B.14.1.30 Ferrichrome-iron receptor OS=Synechocystis sp. (strain PCC 6803 / Kazusa) OX=1111708 GN=fhuA PE=3 SV=1	1.B.14.1	1.B.14	OMR	Outer Membrane Pore-forming Protein I (OMPP-I) Superfamily	CHEBI:84734;Fe(III)-complexed siderophore
IBOJHJNA_01961	1.B.14.1.30	3.81e-166	502	gnl|TC-DB|P72609|1.B.14.1.30 Ferrichrome-iron receptor OS=Synechocystis sp. (strain PCC 6803 / Kazusa) OX=1111708 GN=fhuA PE=3 SV=1	1.B.14.1	1.B.14	OMR	Outer Membrane Pore-forming Protein I (OMPP-I) Superfamily	CHEBI:84734;Fe(III)-complexed siderophore
IBOJHJNA_01972	1.B.14.1.30	4.65e-152	466	gnl|TC-DB|P72609|1.B.14.1.30 Ferrichrome-iron receptor OS=Synechocystis sp. (strain PCC 6803 / Kazusa) OX=1111708 GN=fhuA PE=3 SV=1	1.B.14.1	1.B.14	OMR	Outer Membrane Pore-forming Protein I (OMPP-I) Superfamily	CHEBI:84734;Fe(III)-complexed siderophore
IBOJHJNA_01977	1.B.14.1.10	2.62e-164	497	gnl|TC-DB|Q82VI7|1.B.14.1.10 TonB-dependent receptor protein - Nitrosomonas europaea.	1.B.14.1	1.B.14	OMR	Outer Membrane Pore-forming Protein I (OMPP-I) Superfamily	CHEBI:5044;ferrioxamine B|CHEBI:4356;desferrioxamine B
IBOJHJNA_01980	1.B.14.1.10	0	1030	gnl|TC-DB|Q82VI7|1.B.14.1.10 TonB-dependent receptor protein - Nitrosomonas europaea.	1.B.14.1	1.B.14	OMR	Outer Membrane Pore-forming Protein I (OMPP-I) Superfamily	CHEBI:5044;ferrioxamine B|CHEBI:4356;desferrioxamine B
IBOJHJNA_01984	1.B.14.1.10	1.18e-178	534	gnl|TC-DB|Q82VI7|1.B.14.1.10 TonB-dependent receptor protein - Nitrosomonas europaea.	1.B.14.1	1.B.14	OMR	Outer Membrane Pore-forming Protein I (OMPP-I) Superfamily	CHEBI:5044;ferrioxamine B|CHEBI:4356;desferrioxamine B
IBOJHJNA_01988	1.B.14.1.30	3.41e-153	469	gnl|TC-DB|P72609|1.B.14.1.30 Ferrichrome-iron receptor OS=Synechocystis sp. (strain PCC 6803 / Kazusa) OX=1111708 GN=fhuA PE=3 SV=1	1.B.14.1	1.B.14	OMR	Outer Membrane Pore-forming Protein I (OMPP-I) Superfamily	CHEBI:84734;Fe(III)-complexed siderophore
IBOJHJNA_01999	1.B.14.1.30	3.2e-143	443	gnl|TC-DB|P72609|1.B.14.1.30 Ferrichrome-iron receptor OS=Synechocystis sp. (strain PCC 6803 / Kazusa) OX=1111708 GN=fhuA PE=3 SV=1	1.B.14.1	1.B.14	OMR	Outer Membrane Pore-forming Protein I (OMPP-I) Superfamily	CHEBI:84734;Fe(III)-complexed siderophore
IBOJHJNA_02020	1.A.11.1.4	3.13e-129	380	gnl|TC-DB|O67997|1.A.11.1.4 AmtB OS=Azospirillum brasilense GN=amtB PE=4 SV=1	NA	NA	NA	NA	CHEBI:7434;ammonia
IBOJHJNA_02047	3.A.5.1.1	2.42e-159	456	gnl|TC-DB|P0AGA2|3.A.5.1.1 Preprotein translocase subunit secY - Escherichia coli.	3.A.5.1	3.A.5	Sec	Ankyrin Repeat Domain-containing (Ank) Superfamily	CHEBI:8526;protein polypeptide chain
IBOJHJNA_02092	3.A.1.113.2	1.32e-116	356	gnl|TC-DB|Q51340|3.A.1.113.2 PYOVERDINE SYNTHETASE E - Pseudomonas aeruginosa.	3.A.1.113	3.A.1	ABC	ABC1, ABC2, ABC3 Superfamilies	CHEBI:84046;pyoverdine
IBOJHJNA_02120	1.B.55.2.2	7.92e-102	317	gnl|TC-DB|D8PEM7|1.B.55.2.2 Putative uncharacterized protein OS=Candidatus Nitrospira defluvii GN=NIDE1962 PE=4 SV=1	1.B.55.2	1.B.55	PgaA	Outer Membrane Pore-forming Protein I (OMPP-I) Superfamily	NA
IBOJHJNA_02155	3.A.15.4.1	9.82e-122	376	gnl|TC-DB|Q8F3M7|3.A.15.4.1 Type II secretory pathway ATPase protein E OS=Leptospira interrogans serogroup Icterohaemorrhagiae serovar Lai (strain 56601) GN=gspE PE=4 SV=1	NA	NA	NA	NA	CHEBI:8526;protein polypeptide chain
IBOJHJNA_02223	8.A.1.6.2	3.07e-110	329	gnl|TC-DB|P76397|8.A.1.6.2 Multidrug resistance protein mdtA - Escherichia coli (strain K12).	NA	NA	NA	NA	NA
IBOJHJNA_02224	2.A.6.2.39	0	1259	gnl|TC-DB|Q9I0V6|2.A.6.2.39 Probable Resistance-Nodulation-Cell Division (RND) efflux transporter OS=Pseudomonas aeruginosa GN=PA2527 PE=4 SV=1	2.A.6.2	2.A.6	RND	Resistance-Nodulation-Cell Division (RND) Superfamily	CHEBI:2960;aztreonam|CHEBI:7644;novobiocin|CHEBI:9474;tetracycline|CHEBI:25106;macrolide
IBOJHJNA_02225	2.A.6.2.12	0	1066	gnl|TC-DB|P76399|2.A.6.2.12 Hypothetical protein yegO - Escherichia coli.	2.A.6.2	2.A.6	RND	Resistance-Nodulation-Cell Division (RND) Superfamily	CHEBI:3020;benzalkonium chloride|CHEBI:8984;sodium dodecyl sulfate|CHEBI:23378;copper cation|CHEBI:27365;zinc ion|CHEBI:23614;deoxycholate|CHEBI:4796;enoxacin|CHEBI:7629;norfloxacin|CHEBI:3765;cloxacillin|CHEBI:7456;nalidixic acid|CHEBI:3098;bile acid|CHEBI:6104;kanamycin
IBOJHJNA_02271	3.A.11.1.5	3.17e-143	437	gnl|TC-DB|AKM80112|3.A.11.1.5 putative ATP-dependent DNA helicase [Candidatus Saccharibacteria bacterium GW2011_GWC2_44_17]	NA	NA	NA	NA	NA
IBOJHJNA_02387	3.A.15.4.1	7.2e-124	375	gnl|TC-DB|Q8F3M7|3.A.15.4.1 Type II secretory pathway ATPase protein E OS=Leptospira interrogans serogroup Icterohaemorrhagiae serovar Lai (strain 56601) GN=gspE PE=4 SV=1	NA	NA	NA	NA	CHEBI:8526;protein polypeptide chain
IBOJHJNA_02415	2.A.6.1.17	7.24e-306	876	gnl|TC-DB|Q1LCE8|2.A.6.1.17 Heavy metal cation tricomponent efflux efflux pump ZniA (CzcA-like) OS=Ralstonia metallidurans (strain CH34 / ATCC 43123 / DSM 2839) GN=zniA PE=4 SV=1	2.A.6.1	2.A.6	RND	Resistance-Nodulation-Cell Division (RND) Superfamily	CHEBI:10113;zinc(2+)
IBOJHJNA_02451	1.A.23.1.4	2.45e-130	391	gnl|TC-DB|M4V7W7|1.A.23.1.4 Uncharacterized protein OS=Bdellovibrio exovorus JSS GN=A11Q_300 PE=4 SV=1	NA	NA	NA	NA	NA
IBOJHJNA_02555	9.B.18.2.1	8.04e-111	346	gnl|TC-DB|Q6MMD5|9.B.18.2.1 Nucleotide sugar epimerase/dehydratase OS=Bdellovibrio bacteriovorus (strain ATCC 15356 / DSM 50701 / NCIB 9529 / HD100) GN=wbpM PE=4 SV=1	NA	NA	NA	NA	NA
IBOJHJNA_02641	3.A.2.1.15	9.19e-231	645	gnl|TC-DB|P25705|3.A.2.1.15 ATP synthase subunit alpha, mitochondrial OS=Homo sapiens OX=9606 GN=ATP5F1A PE=1 SV=1	NA	NA	NA	NA	CHEBI:5584;hydron
IBOJHJNA_02643	3.A.2.1.15	5.49e-246	681	gnl|TC-DB|P06576|3.A.2.1.15 ATP synthase subunit beta, mitochondrial OS=Homo sapiens OX=9606 GN=ATP5F1B PE=1 SV=3	NA	NA	NA	NA	CHEBI:5584;hydron
IBOJHJNA_02762	3.A.7.18.1	3.21e-143	417	gnl|TC-DB|Q9L714|3.A.7.18.1 CpaF OS=Caulobacter crescentus GN=cpaF PE=4 SV=1	NA	NA	NA	NA	CHEBI:27026;toxin
IBOJHJNA_02863	2.A.33.1.1	3.04e-105	317	gnl|TC-DB|P13738|2.A.33.1.1 NA(+)/H(+) ANTIPORTER 1 (SODIUM/PROTON ANTIPORTER 1) - Escherichia coli.	NA	NA	NA	NA	CHEBI:9175;sodium(1+)|CHEBI:24636;proton
IBOJHJNA_02936	3.A.23.6.1	2.18e-116	339	gnl|TC-DB|B3ET62|3.A.23.6.1 Glyceraldehyde-3-phosphate dehydrogenase OS=Amoebophilus asiaticus (strain 5a2) GN=Aasi_1069 PE=3 SV=1	3.A.23.6	3.A.23	T6SS	ATP-dependent Clp Protease (Clp) Superfamily	NA
IBOJHJNA_03029	9.B.34.1.8	1.34e-117	373	gnl|TC-DB|WP_128121392.1|9.B.34.1.8 EAL domain-containing protein [Pseudomonas zhaodongensis]	9.B.34.1	9.B.34	KPSH	BART Superfamily	NA
IBOJHJNA_03054	1.B.16.2.7	7.78e-107	331	gnl|TC-DB|D8PHW0|1.B.16.2.7 Putative Anion-selective porin OS=Candidatus Nitrospira defluvii GN=NIDE3153 PE=4 SV=1	1.B.16.2	1.B.16	SAP	Outer Membrane Pore-forming Protein I (OMPP-I) Superfamily	CHEBI:22563;anion
IBOJHJNA_03077	1.A.33.1.2	2.85e-181	526	gnl|TC-DB|P0A6Y8|1.A.33.1.2 Chaperone protein dnaK - Escherichia coli.	NA	NA	NA	NA	CHEBI:24870;ion
IBOJHJNA_03101	2.A.6.3.7	9.75e-156	489	gnl|TC-DB|Q1CZ65|2.A.6.3.7 Efflux transporter, AcrB/AcrD/AcrF family, inner membrane component OS=Myxococcus xanthus (strain DK 1622) GN=MXAN_6177 PE=4 SV=1	2.A.6.3	2.A.6	RND	Resistance-Nodulation-Cell Division (RND) Superfamily	CHEBI:23380;copper(2+)
IBOJHJNA_03117	2.A.67.4.2	4.9e-144	432	gnl|TC-DB|O58099|2.A.67.4.2 Putative uncharacterized protein PH0361 OS=Pyrococcus horikoshii GN=PH0361 PE=4 SV=1	NA	NA	NA	NA	CHEBI:7755;oligopeptide
IBOJHJNA_03173	3.D.1.5.1	1.41e-157	455	gnl|TC-DB|Q74GA5|3.D.1.5.1 NADH dehydrogenase I, D subunit - Geobacter sulfurreducens.	3.D.1.5	3.D.1	NDH	Iron-Sulfur Protein (ISP) Superfamily	CHEBI:5584;hydron
IBOJHJNA_03175	3.D.1.3.1	2.49e-147	426	gnl|TC-DB|Q56222|3.D.1.3.1 NADH-quinone oxidoreductase chain 1 (EC 1.6.99.5) (NADH dehydrogenase I, chain 1) (NDH-1, chain 1) - Thermus thermophilus.	3.D.1.3	3.D.1	NDH	Iron-Sulfur Protein (ISP) Superfamily	CHEBI:5584;hydron
IBOJHJNA_03177	3.D.1.5.1	8.92e-108	318	gnl|TC-DB|Q746T2|3.D.1.5.1 NADH-quinone oxidoreductase subunit H 2 - Geobacter sulfurreducens.	3.D.1.5	3.D.1	NDH	Iron-Sulfur Protein (ISP) Superfamily	CHEBI:5584;hydron
IBOJHJNA_03181	3.D.1.2.1	3.04e-165	488	gnl|TC-DB|P29924|3.D.1.2.1 NADH-ubiquinone oxidoreductase chain 12 (EC 1.6.5.3) (NADH dehydrogenase 1, chain 12) (NDH-1, chain 12) - Paracoccus denitrificans.	3.D.1.2	3.D.1	NDH	Iron-Sulfur Protein (ISP) Superfamily	CHEBI:5584;hydron
IBOJHJNA_03182	3.D.1.2.1	3.14e-140	414	gnl|TC-DB|P29925|3.D.1.2.1 NADH-ubiquinone oxidoreductase chain 13 (EC 1.6.5.3) (NADH dehydrogenase 1, chain 13) (NDH-1, chain 13) - Paracoccus denitrificans.	3.D.1.2	3.D.1	NDH	Iron-Sulfur Protein (ISP) Superfamily	CHEBI:5584;hydron
IBOJHJNA_03208	3.D.10.1.9	1.49e-171	497	gnl|TC-DB|I7FYK4|3.D.10.1.9 Succinate dehydrogenase flavoprotein subunit OS=Mycolicibacterium smegmatis (strain ATCC 700084 / mc(2)155) OX=246196 GN=sdhA PE=3 SV=1	3.D.10.1	3.D.10	SDH	Iron-Sulfur Protein (ISP) Superfamily	CHEBI:24636;proton|CHEBI:30031;succinate(2-)|CHEBI:29806;fumarate(2-)|CHEBI:10545;electron
IBOJHJNA_03267	9.A.2.1.3	4.89e-123	398	gnl|TC-DB|AAT55266.1|9.A.2.1.3 conserved hypothetical protein [Bacillus anthracis str. Sterne]	NA	NA	NA	NA	NA
IBOJHJNA_03322	9.A.2.1.3	3.18e-106	352	gnl|TC-DB|AAT55266.1|9.A.2.1.3 conserved hypothetical protein [Bacillus anthracis str. Sterne]	NA	NA	NA	NA	NA
IBOJHJNA_03360	5.A.3.6.1	1.32e-241	695	gnl|TC-DB|Q7SIF4|5.A.3.6.1 Arsenite oxidase large subunit (EC 1.20.98.1) (AOI) - Alcaligenes faecalis.	5.A.3.6	5.A.3	PMO	Iron-Sulfur Protein (ISP) Superfamily	CHEBI:10545;electron
IBOJHJNA_03368	3.B.1.1.1	1.99e-170	499	gnl|TC-DB|Q03030|3.B.1.1.1 OXALOACETATE DECARBOXYLASE ALPHA CHAIN (EC 4.1.1.3) - Salmonella typhimurium.	3.B.1.1	3.B.1	NaT-DC	CPA Superfamily	CHEBI:9175;sodium(1+)
IBOJHJNA_03396	3.D.1.8.2	8.91e-150	448	gnl|TC-DB|Q8DKX9|3.D.1.8.2 NADH dehydrogenase subunit 5 OS=Thermosynechococcus elongatus (strain BP-1) OX=197221 GN=ndhF1 PE=1 SV=1	3.D.1.8	3.D.1	NDH	Iron-Sulfur Protein (ISP) Superfamily	CHEBI:24636;proton
IBOJHJNA_03401	3.D.1.5.1	4.63e-158	450	gnl|TC-DB|Q74GA5|3.D.1.5.1 NADH dehydrogenase I, D subunit - Geobacter sulfurreducens.	3.D.1.5	3.D.1	NDH	Iron-Sulfur Protein (ISP) Superfamily	CHEBI:5584;hydron
IBOJHJNA_03436	2.A.6.2.33	2.62e-261	760	gnl|TC-DB|Q9HW27|2.A.6.2.33 Probable Resistance-Nodulation-Cell Division (RND) efflux transporter OS=Pseudomonas aeruginosa GN=PA4375 PE=4 SV=1	2.A.6.2	2.A.6	RND	Resistance-Nodulation-Cell Division (RND) Superfamily	CHEBI:3603;chloramphenicol|CHEBI:9474;tetracycline|CHEBI:87211;fluoroquinolone antibiotic|CHEBI:25106;macrolide
IBOJHJNA_03506	1.B.9.1.3	7.27e-177	502	gnl|TC-DB|D8PJ38|1.B.9.1.3 Putative Porin OS=Candidatus Nitrospira defluvii GN=NIDE3592 PE=4 SV=1	1.B.9.1	1.B.9	FadL	Outer Membrane Pore-forming Protein I (OMPP-I) Superfamily	CHEBI:25367;molecule
IBOJHJNA_03533	3.A.5.1.1	4.05e-140	409	gnl|TC-DB|P0AGD7|3.A.5.1.1 Signal recognition particle protein - Escherichia coli.	3.A.5.1	3.A.5	Sec	Ankyrin Repeat Domain-containing (Ank) Superfamily	CHEBI:8526;protein polypeptide chain
IBOJHJNA_03546	3.A.3.5.39	2.37e-293	832	gnl|TC-DB|AMR68964.1|3.A.3.5.39 heavy-metal transporting P-type ATPase [Bradyrhizobium liaoningense]	3.A.3.5	3.A.3	P-ATPase	P-type ATPase (P-ATPase) Superfamily	CHEBI:3290;cadmium(2+)|CHEBI:23379;copper(1+)|CHEBI:27365;zinc ion
IBOJHJNA_03625	2.A.6.2.16	2.50999999999333e-313	896	gnl|TC-DB|Q9I0Y8|2.A.6.2.16 Resistance-Nodulation-Cell Division - Pseudomonas aeruginosa.	2.A.6.2	2.A.6	RND	Resistance-Nodulation-Cell Division (RND) Superfamily	CHEBI:3603;chloramphenicol|CHEBI:15368;acrolein|CHEBI:87211;fluoroquinolone antibiotic
IBOJHJNA_03642	3.A.1.109.8	1.03e-272	766	gnl|TC-DB|P23702|3.A.1.109.8 Leukotoxin export ATP-binding protein LtxB OS=Aggregatibacter actinomycetemcomitans GN=ltxB PE=1 SV=1	3.A.1.109	3.A.1	ABC	ABC1, ABC2, ABC3 Superfamilies	CHEBI:72663;9,10-DiHOME
IBOJHJNA_03676	1.B.6.6.8	4.84e-105	298	gnl|TC-DB|D8PAJ2|1.B.6.6.8 Putative uncharacterized protein OS=Candidatus Nitrospira defluvii GN=NIDE0476 PE=4 SV=1	1.B.6.6	1.B.6	OOP	Outer Membrane Pore-forming Protein I (OMPP-I) Superfamily	CHEBI:25367;molecule
IBOJHJNA_03712	3.A.15.4.1	8.12e-128	385	gnl|TC-DB|Q8F3M7|3.A.15.4.1 Type II secretory pathway ATPase protein E OS=Leptospira interrogans serogroup Icterohaemorrhagiae serovar Lai (strain 56601) GN=gspE PE=4 SV=1	NA	NA	NA	NA	CHEBI:8526;protein polypeptide chain
IBOJHJNA_03812	1.B.14.9.6	2.68e-135	419	gnl|TC-DB|P72594|1.B.14.9.6 Ferric aerobactin receptor OS=Synechocystis sp. (strain PCC 6803 / Kazusa) OX=1111708 GN=iutA PE=3 SV=1	1.B.14.9	1.B.14	OMR	Outer Membrane Pore-forming Protein I (OMPP-I) Superfamily	CHEBI:84688;Fe(III)-complexed hydroxamate siderophore|CHEBI:84734;Fe(III)-complexed siderophore
IBOJHJNA_03814	1.B.14.1.30	3.87e-130	407	gnl|TC-DB|P72609|1.B.14.1.30 Ferrichrome-iron receptor OS=Synechocystis sp. (strain PCC 6803 / Kazusa) OX=1111708 GN=fhuA PE=3 SV=1	1.B.14.1	1.B.14	OMR	Outer Membrane Pore-forming Protein I (OMPP-I) Superfamily	CHEBI:84734;Fe(III)-complexed siderophore
IBOJHJNA_03906	9.B.62.1.5	1.01e-192	555	gnl|TC-DB|Q4KCN4|9.B.62.1.5 Copper resistance protein A OS=Pseudomonas fluorescens (strain Pf-5 / ATCC BAA-477) GN=copA PE=4 SV=1	9.B.62.1	9.B.62	CopD	Copper Resistance (CuR) Superfamily	CHEBI:23380;copper(2+)
IBOJHJNA_03926	2.A.3.3.22	9.32e-145	422	gnl|TC-DB|Q8R706|2.A.3.3.22 Amino acid transporters OS=Caldanaerobacter subterraneus subsp. tengcongensis (strain DSM 15242 / JCM 11007 / NBRC 100824 / MB4) GN=PotE6 PE=4 SV=1	2.A.3.3	2.A.3	APC	APC Superfamily	CHEBI:2642;alpha-amino acid
IBOJHJNA_03961	3.A.12.1.1	3.71e-144	437	gnl|TC-DB|P21458|3.A.12.1.1 Stage III sporulation protein E - Bacillus subtilis.	NA	NA	NA	NA	CHEBI:4291;deoxyribonucleic acid
IBOJHJNA_03977	2.A.6.2.14	0	1536	gnl|TC-DB|B2FLY4|2.A.6.2.14 Putative drug resistance membrane fusion protein OS=Stenotrophomonas maltophilia (strain K279a) GN=smeW PE=4 SV=1	2.A.6.2	2.A.6	RND	Resistance-Nodulation-Cell Division (RND) Superfamily	CHEBI:3603;chloramphenicol|CHEBI:9474;tetracycline|CHEBI:22479;amino cyclitol glycoside|CHEBI:35190;diterpene
IBOJHJNA_03978	2.A.6.2.47	2.49e-126	369	gnl|TC-DB|C5IZH0|2.A.6.2.47 Acriflavin resistance protein AcrA OS=Klebsiella pneumoniae GN=oqxA PE=4 SV=1	2.A.6.2	2.A.6	RND	Resistance-Nodulation-Cell Division (RND) Superfamily	CHEBI:23888;drug
IBOJHJNA_04005	5.A.3.6.1	1.32e-230	667	gnl|TC-DB|Q7SIF4|5.A.3.6.1 Arsenite oxidase large subunit (EC 1.20.98.1) (AOI) - Alcaligenes faecalis.	5.A.3.6	5.A.3	PMO	Iron-Sulfur Protein (ISP) Superfamily	CHEBI:10545;electron
IBOJHJNA_04090	2.A.71.2.4	1.19e-243	678	gnl|TC-DB|M5DKB8|2.A.71.2.4 Folate transporter 3 OS=Nitrosospira lacus GN=EBAPG3_22740 PE=4 SV=1	2.A.71.2	2.A.71	FBT	Major Facilitator (MFS) Superfamily	CHEBI:5140;folic acid
IBOJHJNA_04115	3.A.3.2.29	0	985	gnl|TC-DB|D5C355|3.A.3.2.29 ATPase, P-type (Transporting), HAD superfamily, subfamily IC OS=Nitrosococcus halophilus (strain Nc4) GN=Nhal_1826 PE=3 SV=1	3.A.3.2	3.A.3	P-ATPase	P-type ATPase (P-ATPase) Superfamily	CHEBI:3308;calcium(2+)
IBOJHJNA_04134	3.A.5.1.3	0	943	gnl|TC-DB|Q6MR29|3.A.5.1.3 Protein translocase subunit SecA OS=Bdellovibrio bacteriovorus (strain ATCC 15356 / DSM 50701 / NCIB 9529 / HD100) GN=secA PE=3 SV=1	3.A.5.1	3.A.5	Sec	Ankyrin Repeat Domain-containing (Ank) Superfamily	CHEBI:8526;protein polypeptide chain
IBOJHJNA_04236	3.A.3.5.20	4.57e-208	607	gnl|TC-DB|Q8ZRG7|3.A.3.5.20 Putative cation transport ATPase - Salmonella typhimurium.	3.A.3.5	3.A.3	P-ATPase	P-type ATPase (P-ATPase) Superfamily	NA
IBOJHJNA_04240	3.A.29.1.4	1.65e-181	526	gnl|TC-DB|O67077|3.A.29.1.4 ATP-dependent zinc metalloprotease FtsH OS=Aquifex aeolicus (strain VF5) OX=224324 GN=ftsH PE=1 SV=1	3.A.29.1	3.A.29	MIMP	AAA-ATPase Superfamily	NA
IBOJHJNA_04265	1.B.14.1.30	5.11e-119	379	gnl|TC-DB|P72609|1.B.14.1.30 Ferrichrome-iron receptor OS=Synechocystis sp. (strain PCC 6803 / Kazusa) OX=1111708 GN=fhuA PE=3 SV=1	1.B.14.1	1.B.14	OMR	Outer Membrane Pore-forming Protein I (OMPP-I) Superfamily	CHEBI:84734;Fe(III)-complexed siderophore
IBOJHJNA_04308	3.A.1.1.24	2.72e-125	367	gnl|TC-DB|Q72KX2|3.A.1.1.24 Glucose-binding protein - Thermus thermophilus (strain HB27 / ATCC BAA-163 / DSM 7039).	3.A.1.1	3.A.1	ABC	ABC1, ABC2, ABC3 Superfamilies	CHEBI:5418;glucose|CHEBI:14575;mannose
IBOJHJNA_04323	3.A.1.122.25	1.44e-105	315	gnl|TC-DB|WP_014397198|3.A.1.122.25 ABC transporter permease [Corallococcus coralloides]	3.A.1.122	3.A.1	ABC	ABC1, ABC2, ABC3 Superfamilies	NA

## Sheet: NTP03
ORF	Classification	Subclassification	k number	ko definition	ko name	blastp subject	blastp evalue	blastp bitscore
ECDCFKHL_02160	Carbon	acetate assimilation	K01895	acetyl-CoA synthetase	acs	NGZ95658.1 acetate--CoA ligase [Nitrospira sp. WS110]	0	1228
ECDCFKHL_00843	Carbon	Acetate fermentation	K01512	acylphosphatase	acyP	HGZ37464.1 acylphosphatase [Nitrospirae bacterium]	2.12e-47	156
ECDCFKHL_03434	Carbon	Acetate fermentation	K00925	acetate kinase	ackA	QPD02339.1 Acetate kinase [Candidatus Nitrospira kreftii]	4.39e-238	664
ECDCFKHL_03482	Carbon	Carbon fixation	K15230	ATP-citrate lyase alpha-subunit	aclA	OQW30914.1 ATP citrate lyase [Nitrospira sp. SG-bin1]	0	1178
ECDCFKHL_03483	Carbon	Carbon fixation	K15231	ATP-citrate lyase beta-subunit	aclB	HGZ39131.1 ATP citrate lyase [Nitrospirae bacterium]	1.94e-278	765
ECDCFKHL_03650	Nitrogen	Denitrification	K00368	nitrite reductase (NO-forming)	nirK	NGZ95179.1 nitrite reductase [Nitrospira sp. WS110]	4.42e-238	656
ECDCFKHL_01168	Nitrogen	DNRA/denitrification	K02567	nitrate reductase (cytochrome)	napA	CUQ67876.1 Periplasmic nitrate reductase [Candidatus Nitrospira inopinata]	0	1325
ECDCFKHL_05316	Nitrogen	DNRA/denitrification/nitrification	K00370	nitrate reductase / nitrite oxidoreductase, alpha subunit	narG/nxrA	CUS34649.1 Nitrite oxidoreductase, alpha subunit (C-terminal fragment) [Candidatus Nitrospira nitrificans]	2.72e-268	741
ECDCFKHL_05317	Nitrogen	DNRA/denitrification/nitrification	K00371	nitrate reductase / nitrite oxidoreductase, beta subunit	narH/nxrB	NGZ02070.1 nitrate oxidoreductase subunit beta [Nitrospira sp. WS238]	0	922
ECDCFKHL_01912	Carbon	formate oxidation	K05299	formate dehydrogenase (NADP+) alpha subunit	fdhA	NGZ98572.1 hypothetical protein [Nitrospira sp. WS110]	0	1707
ECDCFKHL_01784	Carbon	Gluconeogenesis	K03841	fructose-1,6-bisphosphatase I	fbp	QPD03481.1 Fructose-1,6-bisphosphatase class 1 [Candidatus Nitrospira kreftii]	2.72e-227	630
ECDCFKHL_04843	Carbon	Gluconeogenesis	K03841	fructose-1,6-bisphosphatase I	fbp	WP_053381813.1 DUF5132 domain-containing protein [Nitrospira moscoviensis]	1.89e-11	66.2
ECDCFKHL_00585	Carbon	Glycolysis	K21071	ATP-dependent phosphofructokinase	pfk	QPD02568.1 Pyrophosphate--fructose 6-phosphate 1-phosphotransferase [Candidatus Nitrospira kreftii]	1.45e-277	765
ECDCFKHL_00989	Carbon	Glycolysis	K00845	glucokinase?	glk	QPD06232.1 Glucokinase [Candidatus Nitrospira kreftii]	1.13e-227	633
ECDCFKHL_03611	Carbon	Glycolysis	K00886	polyphosphate glucokinase	ppgK	MBS0181127.1 ROK family protein [Nitrospira sp.]	6.1e-132	382
ECDCFKHL_03623	Carbon	Glycolysis	K00886	polyphosphate glucokinase	ppgK	NGZ08428.1 ROK family protein [Nitrospira sp. LK70]	2.04e-138	400
ECDCFKHL_03692	Carbon	Glycolysis	K00873	pyruvate kinase	pyk	NGZ95433.1 pyruvate kinase [Nitrospira sp. WS110]	1.29e-241	681
ECDCFKHL_01120	Nitrogen	Nitrification	K10535	hydroxylamine dehydrogenase	hao	QPD05403.1 Hydroxylamine oxidoreductase [Candidatus Nitrospira kreftii]	0	1123
ECDCFKHL_04175	Nitrogen	Nitrification	K10945	methane/ammonia monooxygenase subunit B	pmoB/amoB	NGZ96767.1 methane monooxygenase/ammonia monooxygenase subunit B [Nitrospira sp. WS110]	6.29e-301	824
ECDCFKHL_04176	Nitrogen	Nitrification	K10944	methane/ammonia monooxygenase subunit A	pmoA/amoA	MBK9308579.1 methane monooxygenase/ammonia monooxygenase subunit A [Nitrospira sp.]	4.12e-209	580
ECDCFKHL_00932	Nitrogen	Organic-N	K01426	amidase	amiE	MBA2454069.1 amidase [Chloroflexia bacterium]	2.18e-160	474
ECDCFKHL_02272	Nitrogen	Organic-N	K01428	urease subunit alpha	ureC	THJ18234.1 urease subunit alpha [Nitrospira sp. CG24B]	0	1086
ECDCFKHL_02273	Nitrogen	Organic-N	K01429	urease subunit beta	ureB	QPD03266.1 Urease subunit beta [Candidatus Nitrospira kreftii]	6.96e-82	248
ECDCFKHL_02274	Nitrogen	Organic-N	K01430	urease subunit gamma	ureA	NJL16077.1 urease subunit gamma [Nitrospira sp.]	1.6e-61	192
ECDCFKHL_02903	Nitrogen	Organic-N	K01725	cyanate lyase	cynS	NGZ09192.1 cyanase [Nitrospira sp. LK70]	7.61e-39	135
ECDCFKHL_02730	Carbon	propionate assimilation	K01720	2-methylcitrate dehydratase	prpD	HGZ37733.1 MmgE/PrpD family protein [Nitrospirae bacterium]	0	848
ECDCFKHL_02731	Carbon	propionate assimilation	K03417	methylisocitrate lyase	prpB	OQW32932.1 methylisocitrate lyase [Nitrospira sp. SG-bin1]	1.62e-164	469
ECDCFKHL_02722	Carbon	propionate production	K01848	methylmalonyl-CoA mutase, N-terminal domain	mcmA1	HGZ39417.1 methylmalonyl-CoA mutase [Nitrospirae bacterium]	0	999
ECDCFKHL_02724	Carbon	propionate production	K01849	methylmalonyl-CoA mutase, C-terminal domain	mcmA2	HGZ39415.1 cobalamin B12-binding domain-containing protein [Nitrospirae bacterium]	8.29e-85	254
ECDCFKHL_00007	Oxygen	ROS defense	K03671	thioredoxin 1	trxA	TKB77802.1 thioredoxin [Nitrospira sp.]	2.51e-56	180
ECDCFKHL_00174	Oxygen	ROS defense	K11065	thioredoxin-dependent peroxiredoxin	tpx	NGZ03479.1 thiol peroxidase [Nitrospira sp. WS238]	6.13e-142	405
ECDCFKHL_00570	Oxygen	ROS defense	K03671	thioredoxin 1	trxA	QPD02581.1 hypothetical protein Nkreftii_000355 [Candidatus Nitrospira kreftii]	1.52e-70	216
ECDCFKHL_00690	Oxygen	ROS defense	K00428	cytochrome c peroxidase		OQW33029.1 cytochrome-c peroxidase [Nitrospira sp. SG-bin1]	1.52e-221	618
ECDCFKHL_01654	Oxygen	ROS defense	K03671	thioredoxin 1	trxA	NJN69021.1 thioredoxin [Nitrospira sp.]	5.37e-76	230
ECDCFKHL_01670	Oxygen	ROS defense	K00432	glutathione peroxidase	gpx, btuE, bsaA	NGZ96190.1 glutathione peroxidase [Nitrospira sp. WS110]	3.53e-123	356
ECDCFKHL_01706	Oxygen	ROS defense	K03672	thioredoxin 2	trxC	MBH0193304.1 thioredoxin TrxC [Nitrospira sp.]	4.14e-87	260
ECDCFKHL_01939	Oxygen	ROS defense	K00428	cytochrome c peroxidase		HBR51995.1 hypothetical protein [Nitrospira sp.]	4.94e-50	173
ECDCFKHL_02440	Oxygen	ROS defense	K00384	thioredoxin reductase (NADPH)	trxB, TRR	HBR50709.1 thioredoxin-disulfide reductase [Nitrospira sp.]	6.78e-191	536
ECDCFKHL_03308	Oxygen	ROS defense	K03386	peroxiredoxin 2/4	PRDX2_4, ahpC	NA	NA	NA
ECDCFKHL_03329	Oxygen	ROS defense	K04565	superoxide dismutase, Cu-Zn family	SOD1	MBU6435012.1 superoxide dismutase family protein [Nitrospirae bacterium]	1.31e-103	306
ECDCFKHL_03330	Oxygen	ROS defense	K04564	superoxide dismutase, Fe-Mn family	SOD2	NGZ08441.1 superoxide dismutase [Nitrospira sp. LK70]	1.64e-109	322
ECDCFKHL_03946	Oxygen	ROS defense	K00428	cytochrome c peroxidase		NGZ96687.1 cytochrome-c peroxidase [Nitrospira sp. WS110]	2.17e-227	633
ECDCFKHL_05465	Oxygen	ROS defense	K04564	superoxide dismutase, Fe-Mn family	SOD2	TKB57038.1 superoxide dismutase [Nitrospira sp.]	3.93e-92	282
ECDCFKHL_05480	Oxygen	ROS defense	K04564	superoxide dismutase, Fe-Mn family	SOD2	TMA73648.1 superoxide dismutase [Deltaproteobacteria bacterium]	2.22e-31	120
ECDCFKHL_01083	Oxygen	Terminal oxidase	K00425	cytochrome bd ubiquinol oxidase subunit I	cydA	MBK9308473.1 cytochrome ubiquinol oxidase subunit I [Nitrospira sp.]	0	1047
ECDCFKHL_01088	Oxygen	Terminal oxidase	K00425	cytochrome bd ubiquinol oxidase subunit I	cydA	NGZ98081.1 hypothetical protein [Nitrospira sp. WS110]	0	1155
ECDCFKHL_02256	Oxygen	Terminal oxidase	K00425	cytochrome bd ubiquinol oxidase subunit I	cydA	NGZ97700.1 hypothetical protein [Nitrospira sp. WS110]	0	1216
ECDCFKHL_02262	Oxygen	Terminal oxidase	K00425	cytochrome bd ubiquinol oxidase subunit I	cydA	MBK9309070.1 cytochrome ubiquinol oxidase subunit I [Nitrospira sp.]	0	1138
Extracellular carbohydrate-Active Enzyme
ORF	CAZy classes	evalue	bitscore	Activities
ECDCFKHL_01016	CBM3			Modules of approx. 150 residues found in bacterial enzymes. The cellulose-binding function has been demonstrated in many cases. In one instance binding to chitin has been reported.
ECDCFKHL_04275	CBM48			Modules of approx. 100 residues with glycogen-binding function, appended to GH13 modules. Also found in the beta subunit (glycogen-binding) of AMP-activated protein kinases (AMPK)
Extracellular peptidase
ORF	MEROPS Classification	evalue	bitscore	Catalytic type	MEROPS Name
ECDCFKHL_00676	S08.UPA			Serine	subfamily S8A unassigned peptidases
Transporter
ORF	TCID	evalue	bitscore	gene.product	Subfamily	Family	Fam_abbreviation	Superfamily	substrate
ECDCFKHL_00028	3.A.6.1.1	9.45e-140	406	gnl|TC-DB|P40290|3.A.6.1.1 PROBABLE ATP SYNTHASE YSCN (EC 3.6.1.34) (YOPS SECRETION ATPASE) - Yersinia enterocolitica.	NA	NA	NA	NA	CHEBI:8526;protein polypeptide chain
ECDCFKHL_00042	1.A.104.1.1	5.07e-202	585	gnl|TC-DB|P76298|1.A.104.1.1 Flagellar biosynthesis protein FlhA OS=Escherichia coli (strain K12) GN=flhA PE=3 SV=1	NA	NA	NA	NA	CHEBI:9175;sodium(1+)
ECDCFKHL_00121	3.A.15.4.1	2.84e-164	479	gnl|TC-DB|Q8F3M7|3.A.15.4.1 Type II secretory pathway ATPase protein E OS=Leptospira interrogans serogroup Icterohaemorrhagiae serovar Lai (strain 56601) GN=gspE PE=4 SV=1	NA	NA	NA	NA	CHEBI:8526;protein polypeptide chain
ECDCFKHL_00176	3.B.1.1.6	1.91e-181	527	gnl|TC-DB|Q6A1F6|3.B.1.1.6 Oxaloacetate decarboxylase OS=Vibrio cholerae GN=oadA-2 PE=1 SV=1	3.B.1.1	3.B.1	NaT-DC	CPA Superfamily	CHEBI:9175;sodium(1+)
ECDCFKHL_00275	3.A.5.1.3	2.51e-154	444	gnl|TC-DB|Q6MJ32|3.A.5.1.3 Protein translocase subunit SecY OS=Bdellovibrio bacteriovorus (strain ATCC 15356 / DSM 50701 / NCIB 9529 / HD100) GN=secY PE=3 SV=1	3.A.5.1	3.A.5	Sec	Ankyrin Repeat Domain-containing (Ank) Superfamily	CHEBI:8526;protein polypeptide chain
ECDCFKHL_00311	2.A.114.1.5	1.96e-178	526	gnl|TC-DB|Q0P9Y2|2.A.114.1.5 Putative integral membrane protein (CstA homolog) OS=Campylobacter jejuni subsp. jejuni serotype O:2 (strain NCTC 11168) GN=cstA PE=4 SV=1	2.A.114.1	2.A.114	CstA	APC Superfamily	CHEBI:9742;tripeptide|CHEBI:4634;dipeptide
ECDCFKHL_00320	9.B.146.1.6	7.11e-123	357	gnl|TC-DB|P0A6W3|9.B.146.1.6 Phospho-N-acetylmuramoyl-pentapeptide-transferase OS=Escherichia coli (strain K12) GN=mraY PE=1 SV=1	NA	NA	NA	NA	NA
ECDCFKHL_00379	3.D.4.10.1	4.66e-109	315	gnl|TC-DB|Q51664|3.D.4.10.1 Protein NorQ OS=Paracoccus denitrificans (strain Pd 1222) GN=norQ PE=3 SV=2	NA	NA	NA	NA	CHEBI:5584;hydron
ECDCFKHL_00446	3.A.2.1.15	3.87e-246	682	gnl|TC-DB|P06576|3.A.2.1.15 ATP synthase subunit beta, mitochondrial OS=Homo sapiens OX=9606 GN=ATP5F1B PE=1 SV=3	NA	NA	NA	NA	CHEBI:5584;hydron
ECDCFKHL_00448	3.A.2.1.14	4.41e-231	644	gnl|TC-DB|P09219|3.A.2.1.14 ATP synthase subunit alpha OS=Bacillus sp. (strain PS3) OX=2334 GN=atpA PE=1 SV=1	NA	NA	NA	NA	CHEBI:5584;hydron
ECDCFKHL_00498	3.A.15.4.1	1.44e-119	365	gnl|TC-DB|Q8F3M7|3.A.15.4.1 Type II secretory pathway ATPase protein E OS=Leptospira interrogans serogroup Icterohaemorrhagiae serovar Lai (strain 56601) GN=gspE PE=4 SV=1	NA	NA	NA	NA	CHEBI:8526;protein polypeptide chain
ECDCFKHL_00546	3.A.29.1.5	1.11e-245	690	gnl|TC-DB|P0AAI3|3.A.29.1.5 ATP-dependent zinc metalloprotease FtsH OS=Escherichia coli (strain K12) OX=83333 GN=ftsH PE=1 SV=1	3.A.29.1	3.A.29	MIMP	AAA-ATPase Superfamily	NA
ECDCFKHL_00564	1.A.33.1.4	3.66e-180	523	gnl|TC-DB|G4NXA5|1.A.33.1.4 Chaperone protein DnaK OS=Bacillus subtilis subsp. spizizenii TU-B-10 GN=dnaK PE=3 SV=1	NA	NA	NA	NA	NA
ECDCFKHL_00647	2.A.1.25.2	2.3e-130	384	gnl|TC-DB|P0AE16|2.A.1.25.2 Protein ampG - Escherichia coli.	2.A.1.25	2.A.1	MFS	Major Facilitator (MFS) Superfamily	CHEBI:7990;peptide|CHEBI:24396;glycopeptide
ECDCFKHL_00670	9.B.111.1.5	1.85e-125	387	gnl|TC-DB|WP_121250785|9.B.111.1.5 lysine--tRNA ligase [Solirubrobacter pauli]	9.B.111.1	9.B.111	LysS	Major Facilitator (MFS) Superfamily	NA
ECDCFKHL_00708	3.D.10.1.2	4.57000000190507e-315	867	gnl|TC-DB|Q8F4Z1|3.D.10.1.2 Succinate dehydrogenase flavoprotein subunit OS=Leptospira interrogans serogroup Icterohaemorrhagiae serovar Lai (strain 56601) GN=sdhA PE=4 SV=1	3.D.10.1	3.D.10	SDH	Iron-Sulfur Protein (ISP) Superfamily	CHEBI:30031;succinate(2-)|CHEBI:42511;fumarate(2-)
ECDCFKHL_00709	3.D.10.1.2	3.28e-117	335	gnl|TC-DB|Q8F4Z2|3.D.10.1.2 Succinate dehydrogenase/fumarate reductase iron-sulfur subunit OS=Leptospira interrogans serogroup Icterohaemorrhagiae serovar Lai (strain 56601) GN=LA_1896 PE=4 SV=1	3.D.10.1	3.D.10	SDH	Iron-Sulfur Protein (ISP) Superfamily	CHEBI:30031;succinate(2-)|CHEBI:42511;fumarate(2-)
ECDCFKHL_00753	3.A.15.2.1	7.02e-132	382	gnl|TC-DB|Q51532|3.A.15.2.1 PILU (Twitching motility protein PILU) - Pseudomonas aeruginosa.	NA	NA	NA	NA	NA
ECDCFKHL_00754	3.A.15.2.1	3.98e-151	428	gnl|TC-DB|P24559|3.A.15.2.1 Twitching mobility protein - Pseudomonas aeruginosa.	NA	NA	NA	NA	NA
ECDCFKHL_00900	3.A.3.2.21	6.67e-233	678	gnl|TC-DB|A9BJX0|3.A.3.2.21 Calcium-translocating P-type ATPase, PMCA-type OS=Petrotoga mobilis (strain DSM 10674 / SJ95) GN=Pmob_0991 PE=3 SV=1	3.A.3.2	3.A.3	P-ATPase	P-type ATPase (P-ATPase) Superfamily	CHEBI:3308;calcium(2+)
ECDCFKHL_00922	2.A.36.6.8	2.63e-121	358	gnl|TC-DB|G3XD29|2.A.36.6.8 Na(+)/H(+) antiporter NhaP OS=Pseudomonas aeruginosa (strain ATCC 15692 / PAO1 / 1C / PRS 101 / LMG 12228) GN=nhaP PE=1 SV=1	2.A.36.6	2.A.36	CPA1	CPA Superfamily	CHEBI:9175;sodium(1+)|CHEBI:5584;hydron
ECDCFKHL_00923	1.A.23.1.4	6.91e-117	360	gnl|TC-DB|M4V7W7|1.A.23.1.4 Uncharacterized protein OS=Bdellovibrio exovorus JSS GN=A11Q_300 PE=4 SV=1	NA	NA	NA	NA	NA
ECDCFKHL_00924	1.A.11.4.4	4.74e-212	589	gnl|TC-DB|Q82X47|1.A.11.4.4 Ammonium transporter family OS=Nitrosomonas europaea GN=Rh50 PE=1 SV=1	NA	NA	NA	NA	CHEBI:7434;ammonia|CHEBI:6864;methylamine|CHEBI:3283;carbon dioxide
ECDCFKHL_00930	3.A.15.2.1	2.64e-124	360	gnl|TC-DB|P24559|3.A.15.2.1 Twitching mobility protein - Pseudomonas aeruginosa.	NA	NA	NA	NA	NA
ECDCFKHL_00941	2.A.1.42.2	2.54e-117	390	gnl|TC-DB|Q89SS6|2.A.1.42.2 2-acylglycerophosphoethanolamine acyltransferase (EC 6.2.1.20) - Bradyrhizobium japonicum.	2.A.1.42	2.A.1	MFS	Major Facilitator (MFS) Superfamily	CHEBI:6606;monoacylglycerol phosphate
ECDCFKHL_01006	1.B.16.1.3	1.09e-101	311	gnl|TC-DB|Q1DEU2|1.B.16.1.3 Phosphate-selective porin O and P OS=Myxococcus xanthus (strain DK 1622) GN=MXAN_0562 PE=4 SV=1	1.B.16.1	1.B.16	SAP	Outer Membrane Pore-forming Protein I (OMPP-I) Superfamily	CHEBI:25367;molecule
ECDCFKHL_01116	9.B.14.1.7	7.15e-268	749	gnl|TC-DB|Q9I3N2|9.B.14.1.7 Cytochrome c-type biogenesis protein CcmF OS=Pseudomonas aeruginosa (strain ATCC 15692 / PAO1 / 1C / PRS 101 / LMG 12228) GN=ccmF PE=3 SV=1	NA	NA	NA	NA	NA
ECDCFKHL_01168	3.D.11.1.1	4.85e-159	481	gnl|TC-DB|P33937|3.D.11.1.1 Periplasmic nitrate reductase OS=Escherichia coli (strain K12) OX=83333 GN=napA PE=1 SV=3	3.D.11.1	3.D.11	NAP	Iron-Sulfur Protein (ISP) Superfamily	NA
ECDCFKHL_01231	3.A.10.2.4	9.35e-217	621	gnl|TC-DB|Q8PYZ7|3.A.10.2.4 Pyrophosphate-energized proton pump 2 OS=Methanosarcina mazei GN=hppA2 PE=3 SV=1	NA	NA	NA	NA	CHEBI:9175;sodium(1+)
ECDCFKHL_01266	3.A.1.1.16	1.34e-107	319	gnl|TC-DB|Q8TZQ3|3.A.1.1.16 Putative sugar transport ATP-hydrolyzing - Pyrococcus furiosus.	3.A.1.1	3.A.1	ABC	ABC1, ABC2, ABC3 Superfamilies	CHEBI:17593;maltooligosaccharide
ECDCFKHL_01301	2.A.59.1.3	7.37e-122	354	gnl|TC-DB|Q8EJD3|2.A.59.1.3 Arsenical pump membrane protein, putative OS=Shewanella oneidensis GN=SO_0534 PE=4 SV=1	2.A.59.1	2.A.59	ACR3	BART Superfamily	CHEBI:2844;arsenate(3-)|CHEBI:22632;arsenic molecular entity
ECDCFKHL_01404	3.A.29.1.5	2.39e-247	694	gnl|TC-DB|P0AAI3|3.A.29.1.5 ATP-dependent zinc metalloprotease FtsH OS=Escherichia coli (strain K12) OX=83333 GN=ftsH PE=1 SV=1	3.A.29.1	3.A.29	MIMP	AAA-ATPase Superfamily	NA
ECDCFKHL_01499	2.A.6.3.14	1.54e-171	530	gnl|TC-DB|AUI48178.1|2.A.6.3.14 multidrug transporter AcrB [Bacteroides fragilis]	2.A.6.3	2.A.6	RND	Resistance-Nodulation-Cell Division (RND) Superfamily	CHEBI:4883;ethidium bromide|CHEBI:8984;sodium dodecyl sulfate|CHEBI:3717;ciprofloxacin|CHEBI:28971;ampicillin|CHEBI:3493;cefoperazone|CHEBI:3500;cefoxitin|CHEBI:5879;imipenem|CHEBI:6909;metronidazole
ECDCFKHL_01563	3.A.5.1.1	6.76e-139	405	gnl|TC-DB|P0AGD7|3.A.5.1.1 Signal recognition particle protein - Escherichia coli.	3.A.5.1	3.A.5	Sec	Ankyrin Repeat Domain-containing (Ank) Superfamily	CHEBI:8526;protein polypeptide chain
ECDCFKHL_01609	1.B.9.1.3	5.7e-127	372	gnl|TC-DB|D8PJ38|1.B.9.1.3 Putative Porin OS=Candidatus Nitrospira defluvii GN=NIDE3592 PE=4 SV=1	1.B.9.1	1.B.9	FadL	Outer Membrane Pore-forming Protein I (OMPP-I) Superfamily	CHEBI:25367;molecule
ECDCFKHL_01616	3.D.1.2.1	5.63e-138	408	gnl|TC-DB|P29925|3.D.1.2.1 NADH-ubiquinone oxidoreductase chain 13 (EC 1.6.5.3) (NADH dehydrogenase 1, chain 13) (NDH-1, chain 13) - Paracoccus denitrificans.	3.D.1.2	3.D.1	NDH	Iron-Sulfur Protein (ISP) Superfamily	CHEBI:5584;hydron
ECDCFKHL_01617	3.D.1.2.1	5.9e-159	472	gnl|TC-DB|P29924|3.D.1.2.1 NADH-ubiquinone oxidoreductase chain 12 (EC 1.6.5.3) (NADH dehydrogenase 1, chain 12) (NDH-1, chain 12) - Paracoccus denitrificans.	3.D.1.2	3.D.1	NDH	Iron-Sulfur Protein (ISP) Superfamily	CHEBI:5584;hydron
ECDCFKHL_01621	3.D.1.5.1	7.21e-107	315	gnl|TC-DB|Q746T2|3.D.1.5.1 NADH-quinone oxidoreductase subunit H 2 - Geobacter sulfurreducens.	3.D.1.5	3.D.1	NDH	Iron-Sulfur Protein (ISP) Superfamily	CHEBI:5584;hydron
ECDCFKHL_01623	3.D.1.3.1	1.03e-143	416	gnl|TC-DB|Q56222|3.D.1.3.1 NADH-quinone oxidoreductase chain 1 (EC 1.6.99.5) (NADH dehydrogenase I, chain 1) (NDH-1, chain 1) - Thermus thermophilus.	3.D.1.3	3.D.1	NDH	Iron-Sulfur Protein (ISP) Superfamily	CHEBI:5584;hydron
ECDCFKHL_01625	3.D.1.5.1	4.75e-159	459	gnl|TC-DB|Q74GA5|3.D.1.5.1 NADH dehydrogenase I, D subunit - Geobacter sulfurreducens.	3.D.1.5	3.D.1	NDH	Iron-Sulfur Protein (ISP) Superfamily	CHEBI:5584;hydron
ECDCFKHL_01629	3.A.5.1.3	0	939	gnl|TC-DB|Q6MR29|3.A.5.1.3 Protein translocase subunit SecA OS=Bdellovibrio bacteriovorus (strain ATCC 15356 / DSM 50701 / NCIB 9529 / HD100) GN=secA PE=3 SV=1	3.A.5.1	3.A.5	Sec	Ankyrin Repeat Domain-containing (Ank) Superfamily	CHEBI:8526;protein polypeptide chain
ECDCFKHL_01709	2.A.59.1.3	5.56e-119	347	gnl|TC-DB|Q8EJD3|2.A.59.1.3 Arsenical pump membrane protein, putative OS=Shewanella oneidensis GN=SO_0534 PE=4 SV=1	2.A.59.1	2.A.59	ACR3	BART Superfamily	CHEBI:2844;arsenate(3-)|CHEBI:22632;arsenic molecular entity
ECDCFKHL_01738	3.A.2.2.1	1.44e-225	635	gnl|TC-DB|Q56403|3.A.2.2.1 V-type ATP synthase alpha chain OS=Thermus thermophilus (strain HB8 / ATCC 27634 / DSM 579) OX=300852 GN=atpA PE=1 SV=2	NA	NA	NA	NA	CHEBI:5584;hydron
ECDCFKHL_01739	3.A.2.2.1	8.91e-204	572	gnl|TC-DB|Q56404|3.A.2.2.1 V-type ATP synthase beta chain OS=Thermus thermophilus (strain HB8 / ATCC 27634 / DSM 579) OX=300852 GN=atpB PE=1 SV=2	NA	NA	NA	NA	CHEBI:5584;hydron
ECDCFKHL_01798	1.B.14.1.30	1.34e-142	442	gnl|TC-DB|P72609|1.B.14.1.30 Ferrichrome-iron receptor OS=Synechocystis sp. (strain PCC 6803 / Kazusa) OX=1111708 GN=fhuA PE=3 SV=1	1.B.14.1	1.B.14	OMR	Outer Membrane Pore-forming Protein I (OMPP-I) Superfamily	CHEBI:84734;Fe(III)-complexed siderophore
ECDCFKHL_01801	2.A.108.2.7	6.09e-143	430	gnl|TC-DB|E3HXW9|2.A.108.2.7 Iron permease FTR1 family protein 2 OS=Achromobacter xylosoxidans (strain A8) GN=AXYL_06638 PE=4 SV=1	2.A.108.2	2.A.108	ILT	LysE Superfamily	CHEBI:30179;lead(2+)
ECDCFKHL_01803	2.A.6.2.33	5.16e-211	630	gnl|TC-DB|Q9HW27|2.A.6.2.33 Probable Resistance-Nodulation-Cell Division (RND) efflux transporter OS=Pseudomonas aeruginosa GN=PA4375 PE=4 SV=1	2.A.6.2	2.A.6	RND	Resistance-Nodulation-Cell Division (RND) Superfamily	CHEBI:3603;chloramphenicol|CHEBI:9474;tetracycline|CHEBI:87211;fluoroquinolone antibiotic|CHEBI:25106;macrolide
ECDCFKHL_01891	2.A.3.3.22	1.25e-153	445	gnl|TC-DB|Q8R706|2.A.3.3.22 Amino acid transporters OS=Caldanaerobacter subterraneus subsp. tengcongensis (strain DSM 15242 / JCM 11007 / NBRC 100824 / MB4) GN=PotE6 PE=4 SV=1	2.A.3.3	2.A.3	APC	APC Superfamily	CHEBI:2642;alpha-amino acid
ECDCFKHL_01911	3.D.1.5.1	1.92e-159	454	gnl|TC-DB|Q74GA5|3.D.1.5.1 NADH dehydrogenase I, D subunit - Geobacter sulfurreducens.	3.D.1.5	3.D.1	NDH	Iron-Sulfur Protein (ISP) Superfamily	CHEBI:5584;hydron
ECDCFKHL_01916	3.D.1.3.1	1.8e-148	443	gnl|TC-DB|Q56227|3.D.1.3.1 NADH-quinone oxidoreductase chain 12 (EC 1.6.99.5) (NADH dehydrogenase I, chain 12) (NDH-1, chain 12) - Thermus thermophilus.	3.D.1.3	3.D.1	NDH	Iron-Sulfur Protein (ISP) Superfamily	CHEBI:5584;hydron
ECDCFKHL_01917	3.D.1.2.1	1.36e-104	322	gnl|TC-DB|P29925|3.D.1.2.1 NADH-ubiquinone oxidoreductase chain 13 (EC 1.6.5.3) (NADH dehydrogenase 1, chain 13) (NDH-1, chain 13) - Paracoccus denitrificans.	3.D.1.2	3.D.1	NDH	Iron-Sulfur Protein (ISP) Superfamily	CHEBI:5584;hydron
ECDCFKHL_01958	2.A.6.2.33	2.69e-253	740	gnl|TC-DB|Q9HW27|2.A.6.2.33 Probable Resistance-Nodulation-Cell Division (RND) efflux transporter OS=Pseudomonas aeruginosa GN=PA4375 PE=4 SV=1	2.A.6.2	2.A.6	RND	Resistance-Nodulation-Cell Division (RND) Superfamily	CHEBI:3603;chloramphenicol|CHEBI:9474;tetracycline|CHEBI:87211;fluoroquinolone antibiotic|CHEBI:25106;macrolide
ECDCFKHL_01998	1.A.35.3.2	2.16e-115	338	gnl|TC-DB|Q9WZ31|1.A.35.3.2 Magnesium transport protein CorA OS=Thermotoga maritima (strain ATCC 43589 / MSB8 / DSM 3109 / JCM 10099) GN=corA PE=1 SV=1	NA	NA	NA	NA	CHEBI:6635;magnesium(2+)|CHEBI:23337;cobalt(2+)
ECDCFKHL_02003	4.D.3.1.6	4.51e-107	347	gnl|TC-DB|P37653|4.D.3.1.6 Cellulose synthase catalytic subunit [UDP-forming] OS=Escherichia coli (strain K12) GN=bcsA PE=1 SV=3	4.D.3.1	4.D.3	OpgH	Glycosyl Transferase/Transporter (GTT) Superfamily	CHEBI:3529;(1->4)-beta-D-glucan
ECDCFKHL_02060	3.D.1.3.1	4.15e-122	361	gnl|TC-DB|Q56222|3.D.1.3.1 NADH-quinone oxidoreductase chain 1 (EC 1.6.99.5) (NADH dehydrogenase I, chain 1) (NDH-1, chain 1) - Thermus thermophilus.	3.D.1.3	3.D.1	NDH	Iron-Sulfur Protein (ISP) Superfamily	CHEBI:5584;hydron
ECDCFKHL_02197	2.A.6.3.13	1.36e-293	848	gnl|TC-DB|Q8ECN3|2.A.6.3.13 Thiophosphate efflux pump permease component OS=Shewanella oneidensis (strain MR-1) OX=211586 GN=SO_3103 PE=3 SV=1	2.A.6.3	2.A.6	RND	Resistance-Nodulation-Cell Division (RND) Superfamily	CHEBI:74752;thiophosphate(2-)
ECDCFKHL_02247	2.A.6.4.1	5.09e-103	322	gnl|TC-DB|P0AG90|2.A.6.4.1 Protein-export membrane protein secD - Escherichia coli.	2.A.6.4	2.A.6	RND	Resistance-Nodulation-Cell Division (RND) Superfamily	CHEBI:5584;hydron|CHEBI:8526;protein polypeptide chain
ECDCFKHL_02290	3.A.1.109.1	2.64e-225	645	gnl|TC-DB|P08716|3.A.1.109.1 Hemolysin secretion ATP-binding protein, plasmid - Escherichia coli.	3.A.1.109	3.A.1	ABC	ABC1, ABC2, ABC3 Superfamilies	CHEBI:36080;protein
ECDCFKHL_02313	3.A.15.4.1	6.17e-124	382	gnl|TC-DB|Q8F3M7|3.A.15.4.1 Type II secretory pathway ATPase protein E OS=Leptospira interrogans serogroup Icterohaemorrhagiae serovar Lai (strain 56601) GN=gspE PE=4 SV=1	NA	NA	NA	NA	CHEBI:8526;protein polypeptide chain
ECDCFKHL_02411	2.A.1.42.2	3.82e-123	406	gnl|TC-DB|Q89SS6|2.A.1.42.2 2-acylglycerophosphoethanolamine acyltransferase (EC 6.2.1.20) - Bradyrhizobium japonicum.	2.A.1.42	2.A.1	MFS	Major Facilitator (MFS) Superfamily	CHEBI:6606;monoacylglycerol phosphate
ECDCFKHL_02424	1.A.33.1.2	8.72e-280	778	gnl|TC-DB|P0A6Y8|1.A.33.1.2 Chaperone protein dnaK - Escherichia coli.	NA	NA	NA	NA	CHEBI:24870;ion
ECDCFKHL_02493	3.A.1.103.5	1.21e-116	347	gnl|TC-DB|P72884|3.A.1.103.5 ABC transporter OS=Synechocystis sp. (strain PCC 6803 / Kazusa) GN=rfbB PE=4 SV=1	3.A.1.103	3.A.1	ABC	ABC1, ABC2, ABC3 Superfamilies	CHEBI:4879;ethanol|CHEBI:23008;carbohydrate
ECDCFKHL_02567	2.A.45.2.2	4.51e-125	369	gnl|TC-DB|P0A607|2.A.45.2.2 Uncharacterized transporter Mb2703 OS=Mycobacterium bovis (strain ATCC BAA-935 / AF2122/97) GN=Mb2703 PE=3 SV=1	2.A.45.2	2.A.45	ArsB	IT Superfamily	NA
ECDCFKHL_02613	3.A.29.1.4	1.55e-175	511	gnl|TC-DB|O67077|3.A.29.1.4 ATP-dependent zinc metalloprotease FtsH OS=Aquifex aeolicus (strain VF5) OX=224324 GN=ftsH PE=1 SV=1	3.A.29.1	3.A.29	MIMP	AAA-ATPase Superfamily	NA
ECDCFKHL_02617	3.A.3.2.4	1.62e-206	604	gnl|TC-DB|P37367|3.A.3.2.4 CATION-TRANSPORTING ATPASE PMA1 (EC 3.6.3.-) - Synechocystis sp. (strain PCC 6803).	3.A.3.2	3.A.3	P-ATPase	P-type ATPase (P-ATPase) Superfamily	CHEBI:3308;calcium(2+)
ECDCFKHL_02628	9.A.2.1.3	1.29e-121	394	gnl|TC-DB|AAT55266.1|9.A.2.1.3 conserved hypothetical protein [Bacillus anthracis str. Sterne]	NA	NA	NA	NA	NA
ECDCFKHL_02635	2.A.62.1.2	7.35e-196	552	gnl|TC-DB|Q56EB3|2.A.62.1.2 NhaD - Alkalimonas amylolytica.	2.A.62.1	2.A.62	NhaD	IT Superfamily	CHEBI:30143;lithium(1+)|CHEBI:9175;sodium(1+)|CHEBI:5584;hydron
ECDCFKHL_02658	3.A.1.201.8	5.27e-119	365	gnl|TC-DB|Q0WML0|3.A.1.201.8 Antigen peptide transporter-like 2 - Arabidopsis thaliana (Mouse-ear cress).	3.A.1.201	3.A.1	ABC	ABC1, ABC2, ABC3 Superfamilies	CHEBI:49470;aluminium(3+)
ECDCFKHL_02691	3.A.11.1.5	3.18e-152	461	gnl|TC-DB|AKM80112|3.A.11.1.5 putative ATP-dependent DNA helicase [Candidatus Saccharibacteria bacterium GW2011_GWC2_44_17]	NA	NA	NA	NA	NA
ECDCFKHL_02751	3.A.3.1.8	1.48e-240	701	gnl|TC-DB|Q2FLJ9|3.A.3.1.8 ATPase, E1-E2 type OS=Methanospirillum hungatei (strain JF-1 / DSM 864) GN=Mhun_0636 PE=4 SV=1	3.A.3.1	3.A.3	P-ATPase	P-type ATPase (P-ATPase) Superfamily	CHEBI:9175;sodium(1+)|CHEBI:8345;potassium(1+)
ECDCFKHL_02758	9.B.157.1.4	3e-144	410	gnl|TC-DB|Q8F2L2|9.B.157.1.4 Actin-like ATPase involved in cell morphogenesis OS=Leptospira interrogans serogroup Icterohaemorrhagiae serovar Lai (strain 56601) OX=189518 GN=mreB PE=4 SV=1	NA	NA	NA	NA	NA
ECDCFKHL_02868	2.A.47.4.1	2.41e-134	406	gnl|TC-DB|P72958|2.A.47.4.1 Hypothetical 66.7 kDa protein SLL0640 - Synechocystis sp. (strain PCC 6803).	2.A.47.4	2.A.47	DASS	IT Superfamily	NA
ECDCFKHL_02887	9.B.18.2.1	8.38e-125	382	gnl|TC-DB|Q6MMD5|9.B.18.2.1 Nucleotide sugar epimerase/dehydratase OS=Bdellovibrio bacteriovorus (strain ATCC 15356 / DSM 50701 / NCIB 9529 / HD100) GN=wbpM PE=4 SV=1	NA	NA	NA	NA	NA
ECDCFKHL_02896	3.A.1.103.7	1.34e-104	303	gnl|TC-DB|GAD20700.1|3.A.1.103.7 ABC-type polysaccharide/polyol phosphate export systems, permease component [Acidovorax sp. MR-S7]	3.A.1.103	3.A.1	ABC	ABC1, ABC2, ABC3 Superfamilies	NA
ECDCFKHL_02927	3.A.9.1.2	8.91e-247	714	gnl|TC-DB|Q9FI56|3.A.9.1.2 Chaperone protein ClpC1, chloroplastic OS=Arabidopsis thaliana GN=CLPC1 PE=1 SV=1	3.A.9.1	3.A.9	CEPT or Tic-Toc	ATP-dependent Clp Protease (Clp) Superfamily	CHEBI:8526;protein polypeptide chain
ECDCFKHL_02951	2.A.6.2.16	8.44e-299	859	gnl|TC-DB|Q9I0Y8|2.A.6.2.16 Resistance-Nodulation-Cell Division - Pseudomonas aeruginosa.	2.A.6.2	2.A.6	RND	Resistance-Nodulation-Cell Division (RND) Superfamily	CHEBI:3603;chloramphenicol|CHEBI:15368;acrolein|CHEBI:87211;fluoroquinolone antibiotic
ECDCFKHL_02957	2.A.71.2.4	1.27e-234	655	gnl|TC-DB|M5DKB8|2.A.71.2.4 Folate transporter 3 OS=Nitrosospira lacus GN=EBAPG3_22740 PE=4 SV=1	2.A.71.2	2.A.71	FBT	Major Facilitator (MFS) Superfamily	CHEBI:5140;folic acid
ECDCFKHL_02977	3.A.3.5.39	1.01e-302	853	gnl|TC-DB|AMR68964.1|3.A.3.5.39 heavy-metal transporting P-type ATPase [Bradyrhizobium liaoningense]	3.A.3.5	3.A.3	P-ATPase	P-type ATPase (P-ATPase) Superfamily	CHEBI:3290;cadmium(2+)|CHEBI:23379;copper(1+)|CHEBI:27365;zinc ion
ECDCFKHL_02988	3.A.1.2.31	6.4e-102	314	gnl|TC-DB|Q5SIR0|3.A.1.2.31 Sugar ABC transporter, ATP-binding protein OS=Thermus thermophilus (strain HB8 / ATCC 27634 / DSM 579) OX=300852 GN=TTHA1304 PE=4 SV=1	3.A.1.2	3.A.1	ABC	ABC1, ABC2, ABC3 Superfamilies	CHEBI:35584;purine
ECDCFKHL_03066	3.A.1.120.8	1.81e-209	593	gnl|TC-DB|P9WQK3|3.A.1.120.8 Energy-dependent translational throttle protein EttA OS=Mycobacterium tuberculosis (strain ATCC 25618 / H37Rv) OX=83332 GN=ettA PE=1 SV=1	3.A.1.120	3.A.1	ABC	ABC1, ABC2, ABC3 Superfamilies	NA
ECDCFKHL_03077	3.A.7.18.1	4.37e-138	404	gnl|TC-DB|Q9L714|3.A.7.18.1 CpaF OS=Caulobacter crescentus GN=cpaF PE=4 SV=1	NA	NA	NA	NA	CHEBI:27026;toxin
ECDCFKHL_03092	3.A.1.4.4	2.49e-115	345	gnl|TC-DB|Q9L3S6|3.A.1.4.4 Putative periplasmic binding protein - Anabaena sp. (strain PCC 7120).	3.A.1.4	3.A.1	ABC	ABC1, ABC2, ABC3 Superfamilies	CHEBI:9888;urea
ECDCFKHL_03098	2.A.6.2.17	0	978	gnl|TC-DB|Q9HXW4|2.A.6.2.17 Probable RND efflux transporter - Pseudomonas aeruginosa.	2.A.6.2	2.A.6	RND	Resistance-Nodulation-Cell Division (RND) Superfamily	CHEBI:3603;chloramphenicol|CHEBI:15368;acrolein|CHEBI:9474;tetracycline|CHEBI:29697;triclosan|CHEBI:87211;fluoroquinolone antibiotic|CHEBI:25106;macrolide|CHEBI:4841;erythromycin A
ECDCFKHL_03103	2.A.6.2.33	1.68e-242	711	gnl|TC-DB|Q9HW27|2.A.6.2.33 Probable Resistance-Nodulation-Cell Division (RND) efflux transporter OS=Pseudomonas aeruginosa GN=PA4375 PE=4 SV=1	2.A.6.2	2.A.6	RND	Resistance-Nodulation-Cell Division (RND) Superfamily	CHEBI:3603;chloramphenicol|CHEBI:9474;tetracycline|CHEBI:87211;fluoroquinolone antibiotic|CHEBI:25106;macrolide
ECDCFKHL_03174	3.A.1.106.1	1.46e-131	395	gnl|TC-DB|P60752|3.A.1.106.1 Lipid A export ATP-binding/permease protein msbA - Escherichia coli.	3.A.1.106	3.A.1	ABC	ABC1, ABC2, ABC3 Superfamilies	CHEBI:8150;phospholipid|CHEBI:25051;lipid As|CHEBI:6494;lipopolysaccharide|CHEBI:23888;drug
ECDCFKHL_03190	1.C.107.1.4	6.65e-150	507	gnl|TC-DB|Q93EP6|1.C.107.1.4 TcdB1 OS=Photorhabdus luminescens GN=tcdB1 PE=4 SV=1	NA	NA	NA	NA	CHEBI:27026;toxin
ECDCFKHL_03236	4.C.1.1.4	2.73e-129	389	gnl|TC-DB|P69451|4.C.1.1.4 Long-chain-fatty-acid--CoA ligase - Escherichia coli.	NA	NA	NA	NA	CHEBI:4984;fatty acid
ECDCFKHL_03375	3.A.23.6.1	2.89e-117	341	gnl|TC-DB|B3ET62|3.A.23.6.1 Glyceraldehyde-3-phosphate dehydrogenase OS=Amoebophilus asiaticus (strain 5a2) GN=Aasi_1069 PE=3 SV=1	3.A.23.6	3.A.23	T6SS	ATP-dependent Clp Protease (Clp) Superfamily	NA
ECDCFKHL_03392	3.A.9.1.2	1.69e-294	833	gnl|TC-DB|Q9FI56|3.A.9.1.2 Chaperone protein ClpC1, chloroplastic OS=Arabidopsis thaliana GN=CLPC1 PE=1 SV=1	3.A.9.1	3.A.9	CEPT or Tic-Toc	ATP-dependent Clp Protease (Clp) Superfamily	CHEBI:8526;protein polypeptide chain
ECDCFKHL_03401	1.B.14.1.30	3.37e-122	386	gnl|TC-DB|P72609|1.B.14.1.30 Ferrichrome-iron receptor OS=Synechocystis sp. (strain PCC 6803 / Kazusa) OX=1111708 GN=fhuA PE=3 SV=1	1.B.14.1	1.B.14	OMR	Outer Membrane Pore-forming Protein I (OMPP-I) Superfamily	CHEBI:84734;Fe(III)-complexed siderophore
ECDCFKHL_03430	2.A.36.6.4	1.85e-107	331	gnl|TC-DB|Q0ZAH6|2.A.36.6.4 NhaP - Alkalimonas amylolytica.	2.A.36.6	2.A.36	CPA1	CPA Superfamily	CHEBI:8345;potassium(1+)|CHEBI:5584;hydron|CHEBI:22534;ammonium
ECDCFKHL_03439	3.A.1.105.15	2.48e-128	390	gnl|TC-DB|P0A9U1|3.A.1.105.15 Uncharacterized ABC transporter ATP-binding protein YbhF OS=Escherichia coli (strain K12) GN=ybhF PE=1 SV=1	3.A.1.105	3.A.1	ABC	ABC1, ABC2, ABC3 Superfamilies	CHEBI:23888;drug
ECDCFKHL_03453	1.B.14.1.10	3.47e-159	484	gnl|TC-DB|Q82VI7|1.B.14.1.10 TonB-dependent receptor protein - Nitrosomonas europaea.	1.B.14.1	1.B.14	OMR	Outer Membrane Pore-forming Protein I (OMPP-I) Superfamily	CHEBI:5044;ferrioxamine B|CHEBI:4356;desferrioxamine B
ECDCFKHL_03514	3.A.15.4.1	5.14e-129	388	gnl|TC-DB|Q8F3M7|3.A.15.4.1 Type II secretory pathway ATPase protein E OS=Leptospira interrogans serogroup Icterohaemorrhagiae serovar Lai (strain 56601) GN=gspE PE=4 SV=1	NA	NA	NA	NA	CHEBI:8526;protein polypeptide chain
ECDCFKHL_03523	3.A.12.1.1	9.12e-146	447	gnl|TC-DB|P21458|3.A.12.1.1 Stage III sporulation protein E - Bacillus subtilis.	NA	NA	NA	NA	CHEBI:4291;deoxyribonucleic acid
ECDCFKHL_03525	3.A.1.7.1	9.58e-104	301	gnl|TC-DB|P0AAH0|3.A.1.7.1 Phosphate import ATP-binding protein pstB - Escherichia coli.	3.A.1.7	3.A.1	ABC	ABC1, ABC2, ABC3 Superfamilies	CHEBI:7793;phosphate(3-)
ECDCFKHL_03531	1.B.16.1.3	1.51e-118	353	gnl|TC-DB|Q1DEU2|1.B.16.1.3 Phosphate-selective porin O and P OS=Myxococcus xanthus (strain DK 1622) GN=MXAN_0562 PE=4 SV=1	1.B.16.1	1.B.16	SAP	Outer Membrane Pore-forming Protein I (OMPP-I) Superfamily	CHEBI:25367;molecule
ECDCFKHL_03532	1.B.16.1.3	2.6e-118	353	gnl|TC-DB|Q1DEU2|1.B.16.1.3 Phosphate-selective porin O and P OS=Myxococcus xanthus (strain DK 1622) GN=MXAN_0562 PE=4 SV=1	1.B.16.1	1.B.16	SAP	Outer Membrane Pore-forming Protein I (OMPP-I) Superfamily	CHEBI:25367;molecule
ECDCFKHL_03601	1.B.9.1.3	5.32e-161	462	gnl|TC-DB|D8PJ38|1.B.9.1.3 Putative Porin OS=Candidatus Nitrospira defluvii GN=NIDE3592 PE=4 SV=1	1.B.9.1	1.B.9	FadL	Outer Membrane Pore-forming Protein I (OMPP-I) Superfamily	CHEBI:25367;molecule
ECDCFKHL_03622	2.A.6.2.25	7.1e-104	330	gnl|TC-DB|Q8ZRG9|2.A.6.2.25 Putative cation efflux system protein - Salmonella typhimurium.	2.A.6.2	2.A.6	RND	Resistance-Nodulation-Cell Division (RND) Superfamily	CHEBI:3603;chloramphenicol|CHEBI:23888;drug
ECDCFKHL_03700	9.A.47.2.1	1.15e-148	430	gnl|TC-DB|Q7UHP7|9.A.47.2.1 Putative secretory protein OS=Rhodopirellula baltica (strain SH1) GN=RB13073 PE=4 SV=1	NA	NA	NA	NA	CHEBI:8526;protein polypeptide chain
ECDCFKHL_03734	3.A.11.1.3	1.62e-120	367	gnl|TC-DB|Q8VRL1|3.A.11.1.3 ATP binding motif-containing protein PilF OS=Thermus thermophilus GN=pilF PE=4 SV=1	NA	NA	NA	NA	CHEBI:75980;single-stranded DNA polynucleotide
ECDCFKHL_03818	3.A.7.11.1	3.74e-201	595	gnl|TC-DB|Q5EPB6|3.A.7.11.1 TraC - Neisseria gonorrhoeae.	NA	NA	NA	NA	CHEBI:4291;deoxyribonucleic acid
ECDCFKHL_03822	3.A.7.11.1	1.37e-114	337	gnl|TC-DB|Q5EPB2|3.A.7.11.1 TraU - Neisseria gonorrhoeae.	NA	NA	NA	NA	CHEBI:4291;deoxyribonucleic acid
ECDCFKHL_03897	2.A.6.1.5	2e-283	820	gnl|TC-DB|Q88RT6|2.A.6.1.5 Cobalt/zinc/cadmium efflux RND transporter, permease protein, CzcA family - Pseudomonas putida (strain KT2440).	2.A.6.1	2.A.6	RND	Resistance-Nodulation-Cell Division (RND) Superfamily	CHEBI:3290;cadmium(2+)|CHEBI:49807;lead(2+)|CHEBI:10113;zinc(2+)
ECDCFKHL_03938	2.A.1.59.2	3.35e-122	359	gnl|TC-DB|B2JBG5|2.A.1.59.2 Major facilitator superfamily MFS_1 OS=Nostoc punctiforme (strain ATCC 29133 / PCC 73102) GN=Npun_BF137 PE=4 SV=1	2.A.1.59	2.A.1	MFS	Major Facilitator (MFS) Superfamily	NA
ECDCFKHL_03939	2.A.6.1.10	7.75e-288	829	gnl|TC-DB|Q1D665|2.A.6.1.10 Heavy metal efflux pump, CzcA family OS=Myxococcus xanthus (strain DK 1622) GN=MXAN_3671 PE=4 SV=1	2.A.6.1	2.A.6	RND	Resistance-Nodulation-Cell Division (RND) Superfamily	CHEBI:23380;copper(2+)
ECDCFKHL_03943	9.B.62.1.5	2.36e-189	545	gnl|TC-DB|Q4KCN4|9.B.62.1.5 Copper resistance protein A OS=Pseudomonas fluorescens (strain Pf-5 / ATCC BAA-477) GN=copA PE=4 SV=1	9.B.62.1	9.B.62	CopD	Copper Resistance (CuR) Superfamily	CHEBI:23380;copper(2+)
ECDCFKHL_03944	2.A.6.1.8	1.97e-154	463	gnl|TC-DB|Q1DDM4|2.A.6.1.8 Cation efflux system protein CusA OS=Myxococcus xanthus (strain DK 1622) GN=MXAN_0988 PE=4 SV=1	2.A.6.1	2.A.6	RND	Resistance-Nodulation-Cell Division (RND) Superfamily	CHEBI:23380;copper(2+)
ECDCFKHL_03956	3.D.1.9.1	2.35e-130	399	gnl|TC-DB|P23482|3.D.1.9.1 Hydrogenase-4 component B OS=Escherichia coli (strain K12) GN=hyfB PE=1 SV=2	3.D.1.9	3.D.1	NDH	Iron-Sulfur Protein (ISP) Superfamily	CHEBI:8345;potassium(1+)|CHEBI:5584;hydron
ECDCFKHL_04152	3.D.5.1.1	1.79e-153	442	gnl|TC-DB|Q56586|3.D.5.1.1 Na(+)-translocating NADH-quinone reductase subunit A (EC 1.6.5.-) (Na(+)-translocating NADH-quinone reductase subunit alpha) (Na(+)- translocating NQR subunit A) (Na(+)-NQR subunit A) (NQR complex subunit A) (NQR-1 subunit A) - Vibri	3.D.5.1	3.D.5	Na-NDH	Urea Transporter/Na+ Exporter (UT/RnfD/NqrB) Superfamily	CHEBI:9175;sodium(1+)
ECDCFKHL_04153	3.D.5.1.1	1.25e-162	462	gnl|TC-DB|Q56587|3.D.5.1.1 Na(+)-translocating NADH-quinone reductase subunit B (EC 1.6.5.-) (Na(+)-translocating NQR subunit B) (Na(+)-NQR subunit B) (NQR complex subunit B) (NQR-1 subunit B) - Vibrio alginolyticus.	3.D.5.1	3.D.5	Na-NDH	Urea Transporter/Na+ Exporter (UT/RnfD/NqrB) Superfamily	CHEBI:9175;sodium(1+)
ECDCFKHL_04157	3.D.5.1.1	7.17e-207	574	gnl|TC-DB|Q56584|3.D.5.1.1 Na(+)-translocating NADH-quinone reductase subunit F (EC 1.6.5.-) (Na(+)-translocating NADH-quinone reductase subunit beta) (Na(+)- translocating NQR subunit F) (Na(+)-NQR subunit F) (NQR complex subunit F) (NQR-1 subunit F) - Vibrio	3.D.5.1	3.D.5	Na-NDH	Urea Transporter/Na+ Exporter (UT/RnfD/NqrB) Superfamily	CHEBI:9175;sodium(1+)
ECDCFKHL_04175	9.B.280.1.1	2.66e-110	330	gnl|TC-DB|G4SZ64|9.B.280.1.1 Particulate methane monooxygenase, B subunit OS=Methylomicrobium alcaliphilum (strain DSM 19304 / NCIMB 14124 / VKM B-2133 / 20Z) OX=1091494 GN=pmoB PE=4 SV=1	NA	NA	NA	NA	CHEBI:6811;methane
ECDCFKHL_04332	3.A.1.106.18	7.03e-119	363	gnl|TC-DB|Q72J05|3.A.1.106.18 Multidrug resistance ABC transporter ATP-binding and permease protein OS=Thermus thermophilus (strain HB27 / ATCC BAA-163 / DSM 7039) OX=262724 GN=TT_C0976 PE=1 SV=1	3.A.1.106	3.A.1	ABC	ABC1, ABC2, ABC3 Superfamilies	CHEBI:5742;2'-(4-ethoxyphenyl)-5-(4-methylpiperazin-1-yl)-2,5'-bibenzimidazole
ECDCFKHL_04465	3.A.3.2.29	0	989	gnl|TC-DB|D5C355|3.A.3.2.29 ATPase, P-type (Transporting), HAD superfamily, subfamily IC OS=Nitrosococcus halophilus (strain Nc4) GN=Nhal_1826 PE=3 SV=1	3.A.3.2	3.A.3	P-ATPase	P-type ATPase (P-ATPase) Superfamily	CHEBI:3308;calcium(2+)
ECDCFKHL_04508	9.A.2.1.3	2.25e-106	358	gnl|TC-DB|AAT55266.1|9.A.2.1.3 conserved hypothetical protein [Bacillus anthracis str. Sterne]	NA	NA	NA	NA	NA
ECDCFKHL_04552	1.B.16.2.7	4.66e-293	807	gnl|TC-DB|D8PHW0|1.B.16.2.7 Putative Anion-selective porin OS=Candidatus Nitrospira defluvii GN=NIDE3153 PE=4 SV=1	1.B.16.2	1.B.16	SAP	Outer Membrane Pore-forming Protein I (OMPP-I) Superfamily	CHEBI:22563;anion
ECDCFKHL_04779	1.B.9.1.3	7.52e-141	410	gnl|TC-DB|D8PJ38|1.B.9.1.3 Putative Porin OS=Candidatus Nitrospira defluvii GN=NIDE3592 PE=4 SV=1	1.B.9.1	1.B.9	FadL	Outer Membrane Pore-forming Protein I (OMPP-I) Superfamily	CHEBI:25367;molecule
ECDCFKHL_04845	3.A.3.32.8	2.86e-137	423	gnl|TC-DB|Q8DL41|3.A.3.32.8 Cation-transporting ATPase OS=Thermosynechococcus elongatus (strain BP-1) GN=tll0657 PE=3 SV=1	3.A.3.32	3.A.3	P-ATPase	P-type ATPase (P-ATPase) Superfamily	CHEBI:25213;metal cation
ECDCFKHL_04875	2.A.3.14.1	8.62e-141	424	gnl|TC-DB|A4X503|2.A.3.14.1 Putative uncharacterized protein OS=Salinispora tropica (strain ATCC BAA-916 / DSM 44818 / CNB-440) GN=Strop_1487 PE=4 SV=1	2.A.3.14	2.A.3	APC	APC Superfamily	NA
ECDCFKHL_05163	9.B.153.3.8	7.78e-148	418	gnl|TC-DB|D8P7W0|9.B.153.3.8 Putative uncharacterized protein OS=Candidatus Nitrospira defluvii GN=NIDE3921 PE=4 SV=1	9.B.153.3	9.B.153	BBP/AA	Outer Membrane Pore-forming Protein I (OMPP-I) Superfamily	CHEBI:25367;molecule
ECDCFKHL_05209	1.B.14.1.30	7.17e-127	399	gnl|TC-DB|P72609|1.B.14.1.30 Ferrichrome-iron receptor OS=Synechocystis sp. (strain PCC 6803 / Kazusa) OX=1111708 GN=fhuA PE=3 SV=1	1.B.14.1	1.B.14	OMR	Outer Membrane Pore-forming Protein I (OMPP-I) Superfamily	CHEBI:84734;Fe(III)-complexed siderophore
ECDCFKHL_05453	3.A.9.1.2	6.05e-122	377	gnl|TC-DB|Q9FI56|3.A.9.1.2 Chaperone protein ClpC1, chloroplastic OS=Arabidopsis thaliana GN=CLPC1 PE=1 SV=1	3.A.9.1	3.A.9	CEPT or Tic-Toc	ATP-dependent Clp Protease (Clp) Superfamily	CHEBI:8526;protein polypeptide chain

## Sheet: NTP04
ORF	Classification	Subclassification	k number	ko definition	ko name	blastp subject	blastp evalue	blastp bitscore
CIFBLAND_00923	Carbon	acetate assimilation	K01895	acetyl-CoA synthetase	acs	MBI3612095.1 acetate--CoA ligase [Nitrospirae bacterium]	0	961
CIFBLAND_02779	Carbon	acetate assimilation	K01895	acetyl-CoA synthetase	acs	CAE6786540.1 Acetyl-coenzyme A synthetase [Nitrospira defluvii]	0	1127
CIFBLAND_02528	Carbon	Acetate fermentation	K01512	acylphosphatase	acyP	TLY30452.1 acylphosphatase [Nitrospirae bacterium]	7.48e-32	117
CIFBLAND_03810	Carbon	Acetate fermentation	K00925	acetate kinase	ackA	MBI5315220.1 acetate kinase [Nitrospirae bacterium]	3.1e-231	647
CIFBLAND_00537	Carbon	Acetate formatation	K00156	pyruvate dehydrogenase (quinone)	poxB	NGZ03555.1 pyruvate oxidase [Nitrospira sp. WS238]	0	941
CIFBLAND_02097	Nitrogen	Assimilatory nitrate reduction	K00366	ferredoxin-nitrite reductase	nirA	OQW63630.1 ferredoxin--nitrite reductase [Nitrospira sp. ST-bin5]	2.32999999997019e-314	867
CIFBLAND_00453	Carbon	Carbon fixation	K15230	ATP-citrate lyase alpha-subunit	aclA	MBM4123225.1 ATP citrate lyase [Nitrospira sp.]	0	1103
CIFBLAND_00454	Carbon	Carbon fixation	K15231	ATP-citrate lyase beta-subunit	aclB	MBI5410995.1 ATP citrate lyase [Nitrospirae bacterium]	1.13e-252	700
CIFBLAND_02804	Nitrogen	Denitrification	K00368	nitrite reductase (NO-forming)	nirK	WP_213043591.1 multicopper oxidase domain-containing protein [Nitrospira defluvii]	5.54e-201	564
CIFBLAND_01575	Nitrogen	DNRA	K03385	nitrite reductase (cytochrome c-552)	nrfA	WP_062483184.1 ammonia-forming cytochrome c nitrite reductase subunit c552 [Candidatus Nitrospira inopinata]	8.66e-34	131
CIFBLAND_01576	Nitrogen	DNRA	K03385	nitrite reductase (cytochrome c-552)	nrfA	WP_062483184.1 ammonia-forming cytochrome c nitrite reductase subunit c552 [Candidatus Nitrospira inopinata]	2.24e-114	344
CIFBLAND_01577	Nitrogen	DNRA	K15876	cytochrome c nitrite reductase small subunit	nrfH	CUQ65654.1 Tetraheme cytochrome c NrfH [Candidatus Nitrospira inopinata]	1.18e-90	270
CIFBLAND_01699	Nitrogen	DNRA/denitrification/nitrification	K00371	nitrate reductase / nitrite oxidoreductase, beta subunit	narH/nxrB	WP_053381688.1 nitrate oxidoreductase subunit beta [Nitrospira moscoviensis]	0	917
CIFBLAND_01700	Nitrogen	DNRA/denitrification/nitrification	K00370	nitrate reductase / nitrite oxidoreductase, alpha subunit	narG/nxrA	WP_197685512.1 molybdopterin-dependent oxidoreductase [Nitrospira japonica]	0	2222
CIFBLAND_00332	Carbon	formate oxidation	K21993	formate transporter	fdhC	WP_080880937.1 formate/nitrite transporter family protein [Nitrospira sp. ND1]	8.1e-166	472
CIFBLAND_03288	Carbon	formate oxidation	K05299	formate dehydrogenase (NADP+) alpha subunit	fdhA	MBM4121019.1 NADH-quinone oxidoreductase subunit NuoG [Nitrospira sp.]	0	1256
CIFBLAND_01528	Carbon	Gluconeogenesis	K03841	fructose-1,6-bisphosphatase I	fbp	MBI5411015.1 class 1 fructose-bisphosphatase [Nitrospirae bacterium]	5.02e-177	503
CIFBLAND_00053	Carbon	Glycolysis	K00886	polyphosphate glucokinase	ppgK	NGZ08428.1 ROK family protein [Nitrospira sp. LK70]	6.25e-136	393
CIFBLAND_00890	Carbon	Glycolysis	K21071	ATP-dependent phosphofructokinase	pfk	HEN79292.1 6-phosphofructokinase [Nitrospirae bacterium]	1.66e-235	660
CIFBLAND_00926	Carbon	Glycolysis	K00873	pyruvate kinase	pyk	MBI5315178.1 pyruvate kinase [Nitrospirae bacterium]	0	890
CIFBLAND_01096	Carbon	Glycolysis	K00845	glucokinase?	glk	HAP41925.1 glucokinase [Nitrospira sp.]	9.73e-171	489
CIFBLAND_01819	Carbon	Glycolysis	K00873	pyruvate kinase	pyk	MBA3754414.1 pyruvate kinase [Nitrospira sp.]	4.56e-229	647
CIFBLAND_03809	Carbon	Glycolysis	K21071	ATP-dependent phosphofructokinase	pfk	OLC42882.1 6-phosphofructokinase [Nitrospirae bacterium 13_1_40CM_4_62_6]	1.2e-225	634
CIFBLAND_04101	Carbon	Glycolysis	K00850	6-phosphofructokinase 1	pfkA	WP_087474792.1 6-phosphofructokinase [Nitrospira cf. moscoviensis SBR1015]	0	1259
CIFBLAND_02098	Nitrogen	Nitrification	K10535	hydroxylamine dehydrogenase	hao	WP_053378997.1 cytochrome c3 family protein [Nitrospira moscoviensis]	0	909
CIFBLAND_02104	Nitrogen	Organic-N	K01725	cyanate lyase	cynS	WP_053378992.1 cyanase [Nitrospira moscoviensis]	1.05e-90	270
CIFBLAND_03099	Carbon	propionate assimilation	K01720	2-methylcitrate dehydratase	prpD	TLY29351.1 MmgE/PrpD family protein [Nitrospirae bacterium]	1.04e-243	683
CIFBLAND_03100	Carbon	propionate assimilation	K03417	methylisocitrate lyase	prpB	WP_062487735.1 methylisocitrate lyase [Candidatus Nitrospira inopinata]	8.1e-144	417
CIFBLAND_03092	Carbon	propionate production	K01848	methylmalonyl-CoA mutase, N-terminal domain	mcmA1	MBI4400073.1 methylmalonyl-CoA mutase family protein [Nitrospirae bacterium]	0	919
CIFBLAND_03094	Carbon	propionate production	K01849	methylmalonyl-CoA mutase, C-terminal domain	mcmA2	TLY21353.1 cobalamin B12-binding domain-containing protein [Nitrospirae bacterium]	6.59e-77	234
CIFBLAND_00040	Oxygen	ROS defense	K03671	thioredoxin 1	trxA	HGO76464.1 thioredoxin [Anaerolinea sp.]	1.51e-40	144
CIFBLAND_00121	Oxygen	ROS defense	K04564	superoxide dismutase, Fe-Mn family	SOD2	MBA3242025.1 superoxide dismutase [Acidobacteria bacterium]	1.82e-97	293
CIFBLAND_00539	Oxygen	ROS defense	K04564	superoxide dismutase, Fe-Mn family	SOD2	MBK5283529.1 superoxide dismutase [Nitrospiraceae bacterium]	9.88e-101	300
CIFBLAND_00985	Oxygen	ROS defense	K04565	superoxide dismutase, Cu-Zn family	SOD1	TKS61191.1 superoxide dismutase (Cu-Zn) [Nitrospira sp.]	1.04e-103	306
CIFBLAND_01303	Oxygen	ROS defense	K11065	thioredoxin-dependent peroxiredoxin	tpx	WP_053378853.1 thiol peroxidase [Nitrospira moscoviensis]	7.58e-101	301
CIFBLAND_01544	Oxygen	ROS defense	K03671	thioredoxin 1	trxA	WP_202967321.1 thioredoxin [Nitrospira moscoviensis]	1.22e-63	199
CIFBLAND_01645	Oxygen	ROS defense	K00428	cytochrome c peroxidase		MBL8069847.1 c-type cytochrome [Nitrospira sp.]	3.39e-187	531
CIFBLAND_02009	Oxygen	ROS defense	K00384	thioredoxin reductase (NADPH)	trxB, TRR	NWF72885.1 thioredoxin-disulfide reductase [Nitrospirae bacterium]	8.11e-174	493
CIFBLAND_02542	Oxygen	ROS defense	K00432	glutathione peroxidase	gpx, btuE, bsaA	TKS60283.1 glutathione peroxidase [Nitrospira sp.]	9.4e-106	312
CIFBLAND_03248	Oxygen	ROS defense	K03671	thioredoxin 1	trxA	WP_053379319.1 hypothetical protein [Nitrospira moscoviensis]	4.12e-47	156
CIFBLAND_03598	Oxygen	ROS defense	K00428	cytochrome c peroxidase		OQW62946.1 hypothetical protein BVN29_17280 [Nitrospira sp. ST-bin5]	5.64e-292	815
CIFBLAND_00117	Oxygen	Terminal oxidase	K00425	cytochrome bd ubiquinol oxidase subunit I	cydA	OYT20108.1 hypothetical protein CCU26_08130 [Nitrospira sp. UW-LDO-01]	0	1012
CIFBLAND_00403	Oxygen	Terminal oxidase	K00425	cytochrome bd ubiquinol oxidase subunit I	cydA	ALA57173.1 conserved membrane protein of unknown function, Cytochrome bd-type quinol oxidase subunit 1-like [Nitrospira moscoviensis]	0	1061
CIFBLAND_00408	Oxygen	Terminal oxidase	K00425	cytochrome bd ubiquinol oxidase subunit I	cydA	MSQ77687.1 hypothetical protein [Nitrospiraceae bacterium]	0	982
CIFBLAND_00584	Oxygen	Terminal oxidase	K00425	cytochrome bd ubiquinol oxidase subunit I	cydA	MBA2251319.1 cytochrome ubiquinol oxidase subunit I [Nitrospirales bacterium]	2.54e-219	619
CIFBLAND_00658	Oxygen	Terminal oxidase	K00425	cytochrome bd ubiquinol oxidase subunit I	cydA	WP_053380953.1 cytochrome ubiquinol oxidase subunit I [Nitrospira moscoviensis]	0	1134
CIFBLAND_00666	Oxygen	Terminal oxidase	K00425	cytochrome bd ubiquinol oxidase subunit I	cydA	WP_053380958.1 cytochrome ubiquinol oxidase subunit I [Nitrospira moscoviensis]	0	917
CIFBLAND_01253	Oxygen	Terminal oxidase	K00425	cytochrome bd ubiquinol oxidase subunit I	cydA	MBI5315511.1 cytochrome ubiquinol oxidase subunit I [Nitrospirae bacterium]	1.57e-258	719
Extracellular peptidase
ORF	MEROPS Classification	evalue	bitscore	Catalytic type	MEROPS Name
CIFBLAND_00059	M10.UPB			Metallo	family M10B unassigned peptidases
CIFBLAND_02393	S08.UPB			Serine	subfamily S8B unassigned peptidases
CIFBLAND_03532	S08.UPA			Serine	subfamily S8A unassigned peptidases
Transporter
ORF	TCID	evalue	bitscore	gene.product	Subfamily	Family	Fam_abbreviation	Superfamily	substrate
CIFBLAND_00008	3.A.1.120.8	3.39e-212	600	gnl|TC-DB|P9WQK3|3.A.1.120.8 Energy-dependent translational throttle protein EttA OS=Mycobacterium tuberculosis (strain ATCC 25618 / H37Rv) OX=83332 GN=ettA PE=1 SV=1	3.A.1.120	3.A.1	ABC	ABC1, ABC2, ABC3 Superfamilies	NA
CIFBLAND_00018	9.A.2.1.3	1.31e-113	372	gnl|TC-DB|AAT55266.1|9.A.2.1.3 conserved hypothetical protein [Bacillus anthracis str. Sterne]	NA	NA	NA	NA	NA
CIFBLAND_00063	3.A.1.109.1	2.67e-136	402	gnl|TC-DB|P08716|3.A.1.109.1 Hemolysin secretion ATP-binding protein, plasmid - Escherichia coli.	3.A.1.109	3.A.1	ABC	ABC1, ABC2, ABC3 Superfamilies	CHEBI:36080;protein
CIFBLAND_00064	3.A.1.109.2	8.36e-127	381	gnl|TC-DB|P18770|3.A.1.109.2 Cyclolysin secretion ATP-binding protein cyaB - Bordetella pertussis.	3.A.1.109	3.A.1	ABC	ABC1, ABC2, ABC3 Superfamilies	NA
CIFBLAND_00075	2.A.6.2.16	1.23e-307	882	gnl|TC-DB|Q9I0Y8|2.A.6.2.16 Resistance-Nodulation-Cell Division - Pseudomonas aeruginosa.	2.A.6.2	2.A.6	RND	Resistance-Nodulation-Cell Division (RND) Superfamily	CHEBI:3603;chloramphenicol|CHEBI:15368;acrolein|CHEBI:87211;fluoroquinolone antibiotic
CIFBLAND_00084	3.A.2.2.1	7.96e-211	591	gnl|TC-DB|Q56404|3.A.2.2.1 V-type ATP synthase beta chain OS=Thermus thermophilus (strain HB8 / ATCC 27634 / DSM 579) OX=300852 GN=atpB PE=1 SV=2	NA	NA	NA	NA	CHEBI:5584;hydron
CIFBLAND_00085	3.A.2.2.1	3.33e-224	632	gnl|TC-DB|Q56403|3.A.2.2.1 V-type ATP synthase alpha chain OS=Thermus thermophilus (strain HB8 / ATCC 27634 / DSM 579) OX=300852 GN=atpA PE=1 SV=2	NA	NA	NA	NA	CHEBI:5584;hydron
CIFBLAND_00146	3.A.3.5.20	2.07e-210	612	gnl|TC-DB|Q8ZRG7|3.A.3.5.20 Putative cation transport ATPase - Salmonella typhimurium.	3.A.3.5	3.A.3	P-ATPase	P-type ATPase (P-ATPase) Superfamily	NA
CIFBLAND_00175	2.A.6.2.33	5.25e-257	749	gnl|TC-DB|Q9HW27|2.A.6.2.33 Probable Resistance-Nodulation-Cell Division (RND) efflux transporter OS=Pseudomonas aeruginosa GN=PA4375 PE=4 SV=1	2.A.6.2	2.A.6	RND	Resistance-Nodulation-Cell Division (RND) Superfamily	CHEBI:3603;chloramphenicol|CHEBI:9474;tetracycline|CHEBI:87211;fluoroquinolone antibiotic|CHEBI:25106;macrolide
CIFBLAND_00218	2.A.6.2.16	0	927	gnl|TC-DB|Q9I0Y8|2.A.6.2.16 Resistance-Nodulation-Cell Division - Pseudomonas aeruginosa.	2.A.6.2	2.A.6	RND	Resistance-Nodulation-Cell Division (RND) Superfamily	CHEBI:3603;chloramphenicol|CHEBI:15368;acrolein|CHEBI:87211;fluoroquinolone antibiotic
CIFBLAND_00223	2.A.71.2.4	1.43e-250	696	gnl|TC-DB|M5DKB8|2.A.71.2.4 Folate transporter 3 OS=Nitrosospira lacus GN=EBAPG3_22740 PE=4 SV=1	2.A.71.2	2.A.71	FBT	Major Facilitator (MFS) Superfamily	CHEBI:5140;folic acid
CIFBLAND_00315	2.A.51.1.7	3.35e-115	341	gnl|TC-DB|B1VCG0|2.A.51.1.7 ChrA protein OS=Escherichia coli OX=562 GN=ChrA PE=4 SV=1	NA	NA	NA	NA	CHEBI:29393;chromate(2-)
CIFBLAND_00470	9.B.34.1.8	2.33e-107	346	gnl|TC-DB|WP_128121392.1|9.B.34.1.8 EAL domain-containing protein [Pseudomonas zhaodongensis]	9.B.34.1	9.B.34	KPSH	BART Superfamily	NA
CIFBLAND_00560	8.A.9.1.1	3.61e-114	352	gnl|TC-DB|Q05839|8.A.9.1.1 AMINO ACID TRANSPORT RELATED PROTEIN (RBAT) - Oryctolagus cuniculus (Rabbit).	NA	NA	NA	NA	NA
CIFBLAND_00575	9.B.126.2.6	2.48e-109	322	gnl|TC-DB|B8HSD7|9.B.126.2.6 Ribonuclease BN OS=Cyanothece sp. (strain PCC 7425 / ATCC 29141) GN=Cyan7425_1876 PE=4 SV=1	NA	NA	NA	NA	NA
CIFBLAND_00626	3.A.10.2.4	3.54e-224	640	gnl|TC-DB|Q8PYZ7|3.A.10.2.4 Pyrophosphate-energized proton pump 2 OS=Methanosarcina mazei GN=hppA2 PE=3 SV=1	NA	NA	NA	NA	CHEBI:9175;sodium(1+)
CIFBLAND_00677	2.A.3.14.3	8.57e-142	424	gnl|TC-DB|H1X8H0|2.A.3.14.3 APC family amino acid-polyamine-organocation transporter OS=Weissella confusa LBAE C39-2 GN=WEISSC39_07015 PE=4 SV=1	2.A.3.14	2.A.3	APC	APC Superfamily	NA
CIFBLAND_00688	3.A.15.2.1	3.04e-123	358	gnl|TC-DB|P24559|3.A.15.2.1 Twitching mobility protein - Pseudomonas aeruginosa.	NA	NA	NA	NA	NA
CIFBLAND_00808	3.A.6.2.1	3.9e-143	416	gnl|TC-DB|P26465|3.A.6.2.1 FLAGELLUM-SPECIFIC ATP SYNTHASE (EC 3.6.1.34) - Salmonella typhimurium.	NA	NA	NA	NA	CHEBI:36080;protein
CIFBLAND_00833	1.A.104.1.1	7.33e-211	607	gnl|TC-DB|P76298|1.A.104.1.1 Flagellar biosynthesis protein FlhA OS=Escherichia coli (strain K12) GN=flhA PE=3 SV=1	NA	NA	NA	NA	CHEBI:9175;sodium(1+)
CIFBLAND_00884	2.A.59.1.3	1.32e-112	331	gnl|TC-DB|Q8EJD3|2.A.59.1.3 Arsenical pump membrane protein, putative OS=Shewanella oneidensis GN=SO_0534 PE=4 SV=1	2.A.59.1	2.A.59	ACR3	BART Superfamily	CHEBI:2844;arsenate(3-)|CHEBI:22632;arsenic molecular entity
CIFBLAND_00944	3.A.3.1.8	1.33e-245	714	gnl|TC-DB|Q2FLJ9|3.A.3.1.8 ATPase, E1-E2 type OS=Methanospirillum hungatei (strain JF-1 / DSM 864) GN=Mhun_0636 PE=4 SV=1	3.A.3.1	3.A.3	P-ATPase	P-type ATPase (P-ATPase) Superfamily	CHEBI:9175;sodium(1+)|CHEBI:8345;potassium(1+)
CIFBLAND_00996	2.A.6.3.13	1.22e-297	858	gnl|TC-DB|Q8ECN3|2.A.6.3.13 Thiophosphate efflux pump permease component OS=Shewanella oneidensis (strain MR-1) OX=211586 GN=SO_3103 PE=3 SV=1	2.A.6.3	2.A.6	RND	Resistance-Nodulation-Cell Division (RND) Superfamily	CHEBI:74752;thiophosphate(2-)
CIFBLAND_01002	2.A.36.6.11	5.06e-102	317	gnl|TC-DB|P76007|2.A.36.6.11 K(+)/H(+) antiporter NhaP2 OS=Escherichia coli (strain K12) GN=cvrA PE=1 SV=2	2.A.36.6	2.A.36	CPA1	CPA Superfamily	CHEBI:9175;sodium(1+)
CIFBLAND_01012	3.A.1.105.4	1.07e-135	409	gnl|TC-DB|Q4VWC9|3.A.1.105.4 ATP-binding protein - Pseudomonas sp. M18.	3.A.1.105	3.A.1	ABC	ABC1, ABC2, ABC3 Superfamilies	NA
CIFBLAND_01114	3.A.2.1.14	5.2e-232	646	gnl|TC-DB|P09219|3.A.2.1.14 ATP synthase subunit alpha OS=Bacillus sp. (strain PS3) OX=2334 GN=atpA PE=1 SV=1	NA	NA	NA	NA	CHEBI:5584;hydron
CIFBLAND_01116	3.A.2.1.15	4.02e-246	682	gnl|TC-DB|P06576|3.A.2.1.15 ATP synthase subunit beta, mitochondrial OS=Homo sapiens OX=9606 GN=ATP5F1B PE=1 SV=3	NA	NA	NA	NA	CHEBI:5584;hydron
CIFBLAND_01120	3.A.1.103.5	2.52e-107	325	gnl|TC-DB|P72884|3.A.1.103.5 ABC transporter OS=Synechocystis sp. (strain PCC 6803 / Kazusa) GN=rfbB PE=4 SV=1	3.A.1.103	3.A.1	ABC	ABC1, ABC2, ABC3 Superfamilies	CHEBI:4879;ethanol|CHEBI:23008;carbohydrate
CIFBLAND_01143	1.A.35.3.2	5.36e-105	312	gnl|TC-DB|Q9WZ31|1.A.35.3.2 Magnesium transport protein CorA OS=Thermotoga maritima (strain ATCC 43589 / MSB8 / DSM 3109 / JCM 10099) GN=corA PE=1 SV=1	NA	NA	NA	NA	CHEBI:6635;magnesium(2+)|CHEBI:23337;cobalt(2+)
CIFBLAND_01225	4.D.3.1.6	9.48e-107	342	gnl|TC-DB|P37653|4.D.3.1.6 Cellulose synthase catalytic subunit [UDP-forming] OS=Escherichia coli (strain K12) GN=bcsA PE=1 SV=3	4.D.3.1	4.D.3	OpgH	Glycosyl Transferase/Transporter (GTT) Superfamily	CHEBI:3529;(1->4)-beta-D-glucan
CIFBLAND_01227	9.A.47.2.1	3.53e-150	434	gnl|TC-DB|Q7UHP7|9.A.47.2.1 Putative secretory protein OS=Rhodopirellula baltica (strain SH1) GN=RB13073 PE=4 SV=1	NA	NA	NA	NA	CHEBI:8526;protein polypeptide chain
CIFBLAND_01287	2.A.1.42.2	4.47e-119	395	gnl|TC-DB|Q89SS6|2.A.1.42.2 2-acylglycerophosphoethanolamine acyltransferase (EC 6.2.1.20) - Bradyrhizobium japonicum.	2.A.1.42	2.A.1	MFS	Major Facilitator (MFS) Superfamily	CHEBI:6606;monoacylglycerol phosphate
CIFBLAND_01305	3.B.1.1.6	5.18e-183	531	gnl|TC-DB|Q6A1F6|3.B.1.1.6 Oxaloacetate decarboxylase OS=Vibrio cholerae GN=oadA-2 PE=1 SV=1	3.B.1.1	3.B.1	NaT-DC	CPA Superfamily	CHEBI:9175;sodium(1+)
CIFBLAND_01382	2.A.6.2.33	7.4e-219	652	gnl|TC-DB|Q9HW27|2.A.6.2.33 Probable Resistance-Nodulation-Cell Division (RND) efflux transporter OS=Pseudomonas aeruginosa GN=PA4375 PE=4 SV=1	2.A.6.2	2.A.6	RND	Resistance-Nodulation-Cell Division (RND) Superfamily	CHEBI:3603;chloramphenicol|CHEBI:9474;tetracycline|CHEBI:87211;fluoroquinolone antibiotic|CHEBI:25106;macrolide
CIFBLAND_01387	1.B.14.1.30	2.11e-168	509	gnl|TC-DB|P72609|1.B.14.1.30 Ferrichrome-iron receptor OS=Synechocystis sp. (strain PCC 6803 / Kazusa) OX=1111708 GN=fhuA PE=3 SV=1	1.B.14.1	1.B.14	OMR	Outer Membrane Pore-forming Protein I (OMPP-I) Superfamily	CHEBI:84734;Fe(III)-complexed siderophore
CIFBLAND_01396	1.B.14.1.10	2.36e-172	517	gnl|TC-DB|Q82VI7|1.B.14.1.10 TonB-dependent receptor protein - Nitrosomonas europaea.	1.B.14.1	1.B.14	OMR	Outer Membrane Pore-forming Protein I (OMPP-I) Superfamily	CHEBI:5044;ferrioxamine B|CHEBI:4356;desferrioxamine B
CIFBLAND_01403	1.B.14.1.30	8.11e-162	491	gnl|TC-DB|P72609|1.B.14.1.30 Ferrichrome-iron receptor OS=Synechocystis sp. (strain PCC 6803 / Kazusa) OX=1111708 GN=fhuA PE=3 SV=1	1.B.14.1	1.B.14	OMR	Outer Membrane Pore-forming Protein I (OMPP-I) Superfamily	CHEBI:84734;Fe(III)-complexed siderophore
CIFBLAND_01407	1.B.14.1.30	4.06e-138	431	gnl|TC-DB|P72609|1.B.14.1.30 Ferrichrome-iron receptor OS=Synechocystis sp. (strain PCC 6803 / Kazusa) OX=1111708 GN=fhuA PE=3 SV=1	1.B.14.1	1.B.14	OMR	Outer Membrane Pore-forming Protein I (OMPP-I) Superfamily	CHEBI:84734;Fe(III)-complexed siderophore
CIFBLAND_01410	1.B.14.1.30	2.23e-152	467	gnl|TC-DB|P72609|1.B.14.1.30 Ferrichrome-iron receptor OS=Synechocystis sp. (strain PCC 6803 / Kazusa) OX=1111708 GN=fhuA PE=3 SV=1	1.B.14.1	1.B.14	OMR	Outer Membrane Pore-forming Protein I (OMPP-I) Superfamily	CHEBI:84734;Fe(III)-complexed siderophore
CIFBLAND_01418	1.B.14.9.6	4.66e-219	638	gnl|TC-DB|P72594|1.B.14.9.6 Ferric aerobactin receptor OS=Synechocystis sp. (strain PCC 6803 / Kazusa) OX=1111708 GN=iutA PE=3 SV=1	1.B.14.9	1.B.14	OMR	Outer Membrane Pore-forming Protein I (OMPP-I) Superfamily	CHEBI:84688;Fe(III)-complexed hydroxamate siderophore|CHEBI:84734;Fe(III)-complexed siderophore
CIFBLAND_01460	3.A.1.103.5	1.76e-112	336	gnl|TC-DB|P72884|3.A.1.103.5 ABC transporter OS=Synechocystis sp. (strain PCC 6803 / Kazusa) GN=rfbB PE=4 SV=1	3.A.1.103	3.A.1	ABC	ABC1, ABC2, ABC3 Superfamilies	CHEBI:4879;ethanol|CHEBI:23008;carbohydrate
CIFBLAND_01492	3.A.29.1.4	4.47e-177	515	gnl|TC-DB|O67077|3.A.29.1.4 ATP-dependent zinc metalloprotease FtsH OS=Aquifex aeolicus (strain VF5) OX=224324 GN=ftsH PE=1 SV=1	3.A.29.1	3.A.29	MIMP	AAA-ATPase Superfamily	NA
CIFBLAND_01555	2.A.33.1.1	2.75e-103	312	gnl|TC-DB|P13738|2.A.33.1.1 NA(+)/H(+) ANTIPORTER 1 (SODIUM/PROTON ANTIPORTER 1) - Escherichia coli.	NA	NA	NA	NA	CHEBI:9175;sodium(1+)|CHEBI:24636;proton
CIFBLAND_01574	3.A.3.2.29	2.53e-290	833	gnl|TC-DB|D5C355|3.A.3.2.29 ATPase, P-type (Transporting), HAD superfamily, subfamily IC OS=Nitrosococcus halophilus (strain Nc4) GN=Nhal_1826 PE=3 SV=1	3.A.3.2	3.A.3	P-ATPase	P-type ATPase (P-ATPase) Superfamily	CHEBI:3308;calcium(2+)
CIFBLAND_01758	1.A.33.1.2	3.26e-188	544	gnl|TC-DB|P0A6Y8|1.A.33.1.2 Chaperone protein dnaK - Escherichia coli.	NA	NA	NA	NA	CHEBI:24870;ion
CIFBLAND_01803	3.A.3.7.1	2.22e-310	860	gnl|TC-DB|P03960|3.A.3.7.1 Potassium-transporting ATPase B chain (EC 3.6.3.12) (Potassium- translocating ATPase B chain) (ATP phosphohydrolase [potassium- transporting] B chain) (Potassium binding and translocating subunit B) - Escherichia coli.	3.A.3.7	3.A.3	P-ATPase	P-type ATPase (P-ATPase) Superfamily	CHEBI:8345;potassium(1+)
CIFBLAND_01804	3.A.3.7.2	1.51e-216	613	gnl|TC-DB|Q1M605|3.A.3.7.2 Potassium-transporting ATPase A chain OS=Rhizobium leguminosarum bv. viciae (strain 3841) GN=kdpA PE=3 SV=1	3.A.3.7	3.A.3	P-ATPase	P-type ATPase (P-ATPase) Superfamily	CHEBI:26216;potassium atom
CIFBLAND_01970	2.A.6.3.7	2.07e-160	501	gnl|TC-DB|Q1CZ65|2.A.6.3.7 Efflux transporter, AcrB/AcrD/AcrF family, inner membrane component OS=Myxococcus xanthus (strain DK 1622) GN=MXAN_6177 PE=4 SV=1	2.A.6.3	2.A.6	RND	Resistance-Nodulation-Cell Division (RND) Superfamily	CHEBI:23380;copper(2+)
CIFBLAND_02026	3.A.23.6.1	1.7e-120	349	gnl|TC-DB|B3ET62|3.A.23.6.1 Glyceraldehyde-3-phosphate dehydrogenase OS=Amoebophilus asiaticus (strain 5a2) GN=Aasi_1069 PE=3 SV=1	3.A.23.6	3.A.23	T6SS	ATP-dependent Clp Protease (Clp) Superfamily	NA
CIFBLAND_02066	3.A.11.1.5	8.75e-147	447	gnl|TC-DB|AKM80112|3.A.11.1.5 putative ATP-dependent DNA helicase [Candidatus Saccharibacteria bacterium GW2011_GWC2_44_17]	NA	NA	NA	NA	NA
CIFBLAND_02103	1.A.11.1.4	1.23e-135	396	gnl|TC-DB|O67997|1.A.11.1.4 AmtB OS=Azospirillum brasilense GN=amtB PE=4 SV=1	NA	NA	NA	NA	CHEBI:7434;ammonia
CIFBLAND_02107	3.A.1.16.2	1.11e-123	365	gnl|TC-DB|O07334|3.A.1.16.2 PERIPLASMIC SUBSTRATE BINDING PROTEIN - Synechococcus sp. (strain PCC 7942) (Anacystis nidulans R2).	3.A.1.16	3.A.1	ABC	ABC1, ABC2, ABC3 Superfamilies	CHEBI:7585;nitrite|CHEBI:23419;cyanate
CIFBLAND_02111	1.A.11.1.4	4.17e-136	397	gnl|TC-DB|O67997|1.A.11.1.4 AmtB OS=Azospirillum brasilense GN=amtB PE=4 SV=1	NA	NA	NA	NA	CHEBI:7434;ammonia
CIFBLAND_02137	3.A.5.1.3	1.25e-156	449	gnl|TC-DB|Q6MJ32|3.A.5.1.3 Protein translocase subunit SecY OS=Bdellovibrio bacteriovorus (strain ATCC 15356 / DSM 50701 / NCIB 9529 / HD100) GN=secY PE=3 SV=1	3.A.5.1	3.A.5	Sec	Ankyrin Repeat Domain-containing (Ank) Superfamily	CHEBI:8526;protein polypeptide chain
CIFBLAND_02196	3.A.12.1.1	1.08e-144	444	gnl|TC-DB|P21458|3.A.12.1.1 Stage III sporulation protein E - Bacillus subtilis.	NA	NA	NA	NA	CHEBI:4291;deoxyribonucleic acid
CIFBLAND_02294	2.A.3.3.22	4.67e-141	413	gnl|TC-DB|Q8R706|2.A.3.3.22 Amino acid transporters OS=Caldanaerobacter subterraneus subsp. tengcongensis (strain DSM 15242 / JCM 11007 / NBRC 100824 / MB4) GN=PotE6 PE=4 SV=1	2.A.3.3	2.A.3	APC	APC Superfamily	CHEBI:2642;alpha-amino acid
CIFBLAND_02311	3.D.1.5.1	1.59e-154	441	gnl|TC-DB|Q74GA5|3.D.1.5.1 NADH dehydrogenase I, D subunit - Geobacter sulfurreducens.	3.D.1.5	3.D.1	NDH	Iron-Sulfur Protein (ISP) Superfamily	CHEBI:5584;hydron
CIFBLAND_02317	3.D.1.2.1	6.72e-159	473	gnl|TC-DB|P29924|3.D.1.2.1 NADH-ubiquinone oxidoreductase chain 12 (EC 1.6.5.3) (NADH dehydrogenase 1, chain 12) (NDH-1, chain 12) - Paracoccus denitrificans.	3.D.1.2	3.D.1	NDH	Iron-Sulfur Protein (ISP) Superfamily	CHEBI:5584;hydron
CIFBLAND_02336	2.A.6.2.47	2.42e-290	838	gnl|TC-DB|C5IZH1|2.A.6.2.47 RND family multidrug efflux permease protein OqxB OS=Klebsiella pneumoniae GN=oqxB PE=4 SV=1	2.A.6.2	2.A.6	RND	Resistance-Nodulation-Cell Division (RND) Superfamily	CHEBI:23888;drug
CIFBLAND_02342	2.A.67.4.2	2.75e-138	418	gnl|TC-DB|O58099|2.A.67.4.2 Putative uncharacterized protein PH0361 OS=Pyrococcus horikoshii GN=PH0361 PE=4 SV=1	NA	NA	NA	NA	CHEBI:7755;oligopeptide
CIFBLAND_02352	3.A.9.1.2	5.1e-299	845	gnl|TC-DB|Q9FI56|3.A.9.1.2 Chaperone protein ClpC1, chloroplastic OS=Arabidopsis thaliana GN=CLPC1 PE=1 SV=1	3.A.9.1	3.A.9	CEPT or Tic-Toc	ATP-dependent Clp Protease (Clp) Superfamily	CHEBI:8526;protein polypeptide chain
CIFBLAND_02369	1.B.16.1.10	8.7e-178	509	gnl|TC-DB|D8PFV8|1.B.16.1.10 Putative Phosphate-selective porin OS=Candidatus Nitrospira defluvii GN=NIDE2435 PE=4 SV=1	1.B.16.1	1.B.16	SAP	Outer Membrane Pore-forming Protein I (OMPP-I) Superfamily	CHEBI:7793;phosphate(3-)
CIFBLAND_02372	1.B.16.1.10	2.15e-181	518	gnl|TC-DB|D8PFV8|1.B.16.1.10 Putative Phosphate-selective porin OS=Candidatus Nitrospira defluvii GN=NIDE2435 PE=4 SV=1	1.B.16.1	1.B.16	SAP	Outer Membrane Pore-forming Protein I (OMPP-I) Superfamily	CHEBI:7793;phosphate(3-)
CIFBLAND_02377	3.A.1.7.1	3.71e-104	303	gnl|TC-DB|P0AAH0|3.A.1.7.1 Phosphate import ATP-binding protein pstB - Escherichia coli.	3.A.1.7	3.A.1	ABC	ABC1, ABC2, ABC3 Superfamilies	CHEBI:7793;phosphate(3-)
CIFBLAND_02394	3.A.15.4.1	1.46e-167	487	gnl|TC-DB|Q8F3M7|3.A.15.4.1 Type II secretory pathway ATPase protein E OS=Leptospira interrogans serogroup Icterohaemorrhagiae serovar Lai (strain 56601) GN=gspE PE=4 SV=1	NA	NA	NA	NA	CHEBI:8526;protein polypeptide chain
CIFBLAND_02453	3.A.29.1.5	1.11e-245	690	gnl|TC-DB|P0AAI3|3.A.29.1.5 ATP-dependent zinc metalloprotease FtsH OS=Escherichia coli (strain K12) OX=83333 GN=ftsH PE=1 SV=1	3.A.29.1	3.A.29	MIMP	AAA-ATPase Superfamily	NA
CIFBLAND_02639	3.A.15.4.1	1.58e-114	353	gnl|TC-DB|Q8F3M7|3.A.15.4.1 Type II secretory pathway ATPase protein E OS=Leptospira interrogans serogroup Icterohaemorrhagiae serovar Lai (strain 56601) GN=gspE PE=4 SV=1	NA	NA	NA	NA	CHEBI:8526;protein polypeptide chain
CIFBLAND_02655	2.A.6.1.8	0	1161	gnl|TC-DB|Q1DDM4|2.A.6.1.8 Cation efflux system protein CusA OS=Myxococcus xanthus (strain DK 1622) GN=MXAN_0988 PE=4 SV=1	2.A.6.1	2.A.6	RND	Resistance-Nodulation-Cell Division (RND) Superfamily	CHEBI:23380;copper(2+)
CIFBLAND_02662	2.A.6.1.10	2.70999999771341e-315	899	gnl|TC-DB|Q1D665|2.A.6.1.10 Heavy metal efflux pump, CzcA family OS=Myxococcus xanthus (strain DK 1622) GN=MXAN_3671 PE=4 SV=1	2.A.6.1	2.A.6	RND	Resistance-Nodulation-Cell Division (RND) Superfamily	CHEBI:23380;copper(2+)
CIFBLAND_02673	3.D.1.9.1	2.47e-133	407	gnl|TC-DB|P23482|3.D.1.9.1 Hydrogenase-4 component B OS=Escherichia coli (strain K12) GN=hyfB PE=1 SV=2	3.D.1.9	3.D.1	NDH	Iron-Sulfur Protein (ISP) Superfamily	CHEBI:8345;potassium(1+)|CHEBI:5584;hydron
CIFBLAND_02677	3.D.1.9.1	2.66e-103	319	gnl|TC-DB|P77437|3.D.1.9.1 Hydrogenase-4 component F OS=Escherichia coli (strain K12) GN=hyfF PE=3 SV=1	3.D.1.9	3.D.1	NDH	Iron-Sulfur Protein (ISP) Superfamily	CHEBI:8345;potassium(1+)|CHEBI:5584;hydron
CIFBLAND_02684	9.A.2.1.3	6.16e-133	424	gnl|TC-DB|AAT55266.1|9.A.2.1.3 conserved hypothetical protein [Bacillus anthracis str. Sterne]	NA	NA	NA	NA	NA
CIFBLAND_02699	9.A.2.1.3	1.1e-120	392	gnl|TC-DB|AAT55266.1|9.A.2.1.3 conserved hypothetical protein [Bacillus anthracis str. Sterne]	NA	NA	NA	NA	NA
CIFBLAND_02727	2.A.6.1.2	1.42e-272	792	gnl|TC-DB|P13511|2.A.6.1.2 COBALT-ZINC-CADMIUM RESISTANCE PROTEIN CZCA (CATION EFFLUX SYSTEM PROTEIN CZCA) - Alcaligenes eutrophus (Ralstonia eutropha).	2.A.6.1	2.A.6	RND	Resistance-Nodulation-Cell Division (RND) Superfamily	CHEBI:3290;cadmium(2+)|CHEBI:23337;cobalt(2+)|CHEBI:10113;zinc(2+)
CIFBLAND_02729	1.A.23.1.4	9.79e-125	377	gnl|TC-DB|M4V7W7|1.A.23.1.4 Uncharacterized protein OS=Bdellovibrio exovorus JSS GN=A11Q_300 PE=4 SV=1	NA	NA	NA	NA	NA
CIFBLAND_02731	2.A.6.1.13	1.27e-275	799	gnl|TC-DB|Q9RLI8|2.A.6.1.13 CzrA protein OS=Pseudomonas aeruginosa GN=czrA PE=4 SV=1	2.A.6.1	2.A.6	RND	Resistance-Nodulation-Cell Division (RND) Superfamily	CHEBI:3290;cadmium(2+)|CHEBI:10113;zinc(2+)
CIFBLAND_02801	2.A.45.2.2	3.51e-124	367	gnl|TC-DB|P0A607|2.A.45.2.2 Uncharacterized transporter Mb2703 OS=Mycobacterium bovis (strain ATCC BAA-935 / AF2122/97) GN=Mb2703 PE=3 SV=1	2.A.45.2	2.A.45	ArsB	IT Superfamily	NA
CIFBLAND_02859	3.A.15.4.1	3.59e-123	380	gnl|TC-DB|Q8F3M7|3.A.15.4.1 Type II secretory pathway ATPase protein E OS=Leptospira interrogans serogroup Icterohaemorrhagiae serovar Lai (strain 56601) GN=gspE PE=4 SV=1	NA	NA	NA	NA	CHEBI:8526;protein polypeptide chain
CIFBLAND_02874	3.A.1.109.1	1.32e-271	763	gnl|TC-DB|P08716|3.A.1.109.1 Hemolysin secretion ATP-binding protein, plasmid - Escherichia coli.	3.A.1.109	3.A.1	ABC	ABC1, ABC2, ABC3 Superfamilies	CHEBI:36080;protein
CIFBLAND_02935	2.A.6.1.17	7.97999999999981e-311	889	gnl|TC-DB|Q1LCE8|2.A.6.1.17 Heavy metal cation tricomponent efflux efflux pump ZniA (CzcA-like) OS=Ralstonia metallidurans (strain CH34 / ATCC 43123 / DSM 2839) GN=zniA PE=4 SV=1	2.A.6.1	2.A.6	RND	Resistance-Nodulation-Cell Division (RND) Superfamily	CHEBI:10113;zinc(2+)
CIFBLAND_02946	1.B.72.2.1	9.62e-110	323	gnl|TC-DB|D8PE63|1.B.72.2.1 Uncharacterized protein OS=Candidatus Nitrospira defluvii GN=NIDE1793 PE=4 SV=1	1.B.72.2	1.B.72	PomS/T	Outer Membrane Pore-forming Protein I (OMPP-I) Superfamily	NA
CIFBLAND_02970	3.A.1.106.1	1.2e-135	406	gnl|TC-DB|P60752|3.A.1.106.1 Lipid A export ATP-binding/permease protein msbA - Escherichia coli.	3.A.1.106	3.A.1	ABC	ABC1, ABC2, ABC3 Superfamilies	CHEBI:8150;phospholipid|CHEBI:25051;lipid As|CHEBI:6494;lipopolysaccharide|CHEBI:23888;drug
CIFBLAND_03004	3.A.5.2.2	1.16e-131	389	gnl|TC-DB|P66844|3.A.5.2.2 Signal recognition particle protein OS=Mycobacterium tuberculosis GN=ffh PE=3 SV=1	3.A.5.2	3.A.5	Sec	Ankyrin Repeat Domain-containing (Ank) Superfamily	CHEBI:8526;protein polypeptide chain
CIFBLAND_03011	3.A.1.1.10	1.7e-120	352	gnl|TC-DB|Q9KWT9|3.A.1.1.10 AlgS - Sphingomonas sp.	3.A.1.1	3.A.1	ABC	ABC1, ABC2, ABC3 Superfamilies	CHEBI:271;alginic acid
CIFBLAND_03045	3.A.15.2.1	5.62e-150	425	gnl|TC-DB|P24559|3.A.15.2.1 Twitching mobility protein - Pseudomonas aeruginosa.	NA	NA	NA	NA	NA
CIFBLAND_03046	3.A.15.2.1	2.15e-138	399	gnl|TC-DB|Q51532|3.A.15.2.1 PILU (Twitching motility protein PILU) - Pseudomonas aeruginosa.	NA	NA	NA	NA	NA
CIFBLAND_03081	4.C.1.1.4	1.47e-125	379	gnl|TC-DB|P69451|4.C.1.1.4 Long-chain-fatty-acid--CoA ligase - Escherichia coli.	NA	NA	NA	NA	CHEBI:4984;fatty acid
CIFBLAND_03123	3.D.10.1.9	4.04e-166	483	gnl|TC-DB|I7FYK4|3.D.10.1.9 Succinate dehydrogenase flavoprotein subunit OS=Mycolicibacterium smegmatis (strain ATCC 700084 / mc(2)155) OX=246196 GN=sdhA PE=3 SV=1	3.D.10.1	3.D.10	SDH	Iron-Sulfur Protein (ISP) Superfamily	CHEBI:24636;proton|CHEBI:30031;succinate(2-)|CHEBI:29806;fumarate(2-)|CHEBI:10545;electron
CIFBLAND_03166	3.A.9.1.2	4.92e-259	745	gnl|TC-DB|Q9FI56|3.A.9.1.2 Chaperone protein ClpC1, chloroplastic OS=Arabidopsis thaliana GN=CLPC1 PE=1 SV=1	3.A.9.1	3.A.9	CEPT or Tic-Toc	ATP-dependent Clp Protease (Clp) Superfamily	CHEBI:8526;protein polypeptide chain
CIFBLAND_03220	9.B.111.1.5	1.57e-119	371	gnl|TC-DB|WP_121250785|9.B.111.1.5 lysine--tRNA ligase [Solirubrobacter pauli]	9.B.111.1	9.B.111	LysS	Major Facilitator (MFS) Superfamily	NA
CIFBLAND_03285	3.D.1.5.1	1.65e-163	471	gnl|TC-DB|Q74GA5|3.D.1.5.1 NADH dehydrogenase I, D subunit - Geobacter sulfurreducens.	3.D.1.5	3.D.1	NDH	Iron-Sulfur Protein (ISP) Superfamily	CHEBI:5584;hydron
CIFBLAND_03287	3.D.1.3.1	2.73e-142	413	gnl|TC-DB|Q56222|3.D.1.3.1 NADH-quinone oxidoreductase chain 1 (EC 1.6.99.5) (NADH dehydrogenase I, chain 1) (NDH-1, chain 1) - Thermus thermophilus.	3.D.1.3	3.D.1	NDH	Iron-Sulfur Protein (ISP) Superfamily	CHEBI:5584;hydron
CIFBLAND_03289	3.D.1.5.1	9.63e-110	323	gnl|TC-DB|Q746T2|3.D.1.5.1 NADH-quinone oxidoreductase subunit H 2 - Geobacter sulfurreducens.	3.D.1.5	3.D.1	NDH	Iron-Sulfur Protein (ISP) Superfamily	CHEBI:5584;hydron
CIFBLAND_03293	3.D.1.2.1	4.3e-156	465	gnl|TC-DB|P29924|3.D.1.2.1 NADH-ubiquinone oxidoreductase chain 12 (EC 1.6.5.3) (NADH dehydrogenase 1, chain 12) (NDH-1, chain 12) - Paracoccus denitrificans.	3.D.1.2	3.D.1	NDH	Iron-Sulfur Protein (ISP) Superfamily	CHEBI:5584;hydron
CIFBLAND_03294	3.D.1.2.1	9.22e-146	428	gnl|TC-DB|P29925|3.D.1.2.1 NADH-ubiquinone oxidoreductase chain 13 (EC 1.6.5.3) (NADH dehydrogenase 1, chain 13) (NDH-1, chain 13) - Paracoccus denitrificans.	3.D.1.2	3.D.1	NDH	Iron-Sulfur Protein (ISP) Superfamily	CHEBI:5584;hydron
CIFBLAND_03321	9.B.146.1.6	9.76e-126	365	gnl|TC-DB|P0A6W3|9.B.146.1.6 Phospho-N-acetylmuramoyl-pentapeptide-transferase OS=Escherichia coli (strain K12) GN=mraY PE=1 SV=1	NA	NA	NA	NA	NA
CIFBLAND_03452	3.A.15.4.1	9.54e-124	375	gnl|TC-DB|Q8F3M7|3.A.15.4.1 Type II secretory pathway ATPase protein E OS=Leptospira interrogans serogroup Icterohaemorrhagiae serovar Lai (strain 56601) GN=gspE PE=4 SV=1	NA	NA	NA	NA	CHEBI:8526;protein polypeptide chain
CIFBLAND_03497	2.A.128.2.3	1.48e-105	330	gnl|TC-DB|WP_087280510.1|2.A.128.2.3 UDP-N-acetylmuramoyl-L-alanyl-D-glutamate--2,6-diaminopimelate ligase [Eubacterium sp. An3]	NA	NA	NA	NA	NA
CIFBLAND_03505	2.A.114.1.5	3.12e-184	538	gnl|TC-DB|Q0P9Y2|2.A.114.1.5 Putative integral membrane protein (CstA homolog) OS=Campylobacter jejuni subsp. jejuni serotype O:2 (strain NCTC 11168) GN=cstA PE=4 SV=1	2.A.114.1	2.A.114	CstA	APC Superfamily	CHEBI:9742;tripeptide|CHEBI:4634;dipeptide
CIFBLAND_03524	2.A.6.3.14	5.41e-157	493	gnl|TC-DB|AUI48178.1|2.A.6.3.14 multidrug transporter AcrB [Bacteroides fragilis]	2.A.6.3	2.A.6	RND	Resistance-Nodulation-Cell Division (RND) Superfamily	CHEBI:4883;ethidium bromide|CHEBI:8984;sodium dodecyl sulfate|CHEBI:3717;ciprofloxacin|CHEBI:28971;ampicillin|CHEBI:3493;cefoperazone|CHEBI:3500;cefoxitin|CHEBI:5879;imipenem|CHEBI:6909;metronidazole
CIFBLAND_03548	3.A.1.135.5	2.62e-118	362	gnl|TC-DB|Q9WYC4|3.A.1.135.5 Uncharacterized ABC transporter ATP-binding protein TM_0288 OS=Thermotoga maritima (strain ATCC 43589 / MSB8 / DSM 3109 / JCM 10099) GN=TM_0288 PE=1 SV=1	3.A.1.135	3.A.1	ABC	ABC1, ABC2, ABC3 Superfamilies	CHEBI:4330;daunorubicin
CIFBLAND_03558	1.A.33.1.2	1.21e-277	773	gnl|TC-DB|P0A6Y8|1.A.33.1.2 Chaperone protein dnaK - Escherichia coli.	NA	NA	NA	NA	CHEBI:24870;ion
CIFBLAND_03573	2.A.6.2.39	0	1118	gnl|TC-DB|Q9I0V7|2.A.6.2.39 Probable Resistance-Nodulation-Cell Division (RND) efflux transporter OS=Pseudomonas aeruginosa GN=PA2526 PE=4 SV=1	2.A.6.2	2.A.6	RND	Resistance-Nodulation-Cell Division (RND) Superfamily	CHEBI:2960;aztreonam|CHEBI:7644;novobiocin|CHEBI:9474;tetracycline|CHEBI:25106;macrolide
CIFBLAND_03574	2.A.6.2.39	0	1301	gnl|TC-DB|Q9I0V6|2.A.6.2.39 Probable Resistance-Nodulation-Cell Division (RND) efflux transporter OS=Pseudomonas aeruginosa GN=PA2527 PE=4 SV=1	2.A.6.2	2.A.6	RND	Resistance-Nodulation-Cell Division (RND) Superfamily	CHEBI:2960;aztreonam|CHEBI:7644;novobiocin|CHEBI:9474;tetracycline|CHEBI:25106;macrolide
CIFBLAND_03575	8.A.1.6.2	9.2e-104	313	gnl|TC-DB|P76397|8.A.1.6.2 Multidrug resistance protein mdtA - Escherichia coli (strain K12).	NA	NA	NA	NA	NA
CIFBLAND_03594	1.B.3.1.10	4.38e-140	411	gnl|TC-DB|D8PC30|1.B.3.1.10 Putative uncharacterized protein OS=Candidatus Nitrospira defluvii GN=NIDE1028 PE=4 SV=1	1.B.3.1	1.B.3	SP	Outer Membrane Pore-forming Protein I (OMPP-I) Superfamily	NA
CIFBLAND_03652	3.A.1.135.10	7.33e-114	351	gnl|TC-DB|A4XGX1|3.A.1.135.10 ABC transporter related protein OS=Caldicellulosiruptor saccharolyticus (strain ATCC 43494 / DSM 8903 / Tp8T 6331) OX=351627 GN=Csac_0522 PE=4 SV=1	3.A.1.135	3.A.1	ABC	ABC1, ABC2, ABC3 Superfamilies	NA
CIFBLAND_03669	1.B.16.2.7	8.61e-296	813	gnl|TC-DB|D8PHW0|1.B.16.2.7 Putative Anion-selective porin OS=Candidatus Nitrospira defluvii GN=NIDE3153 PE=4 SV=1	1.B.16.2	1.B.16	SAP	Outer Membrane Pore-forming Protein I (OMPP-I) Superfamily	CHEBI:22563;anion
CIFBLAND_03681	2.A.6.3.7	3.3e-155	488	gnl|TC-DB|Q1CZ65|2.A.6.3.7 Efflux transporter, AcrB/AcrD/AcrF family, inner membrane component OS=Myxococcus xanthus (strain DK 1622) GN=MXAN_6177 PE=4 SV=1	2.A.6.3	2.A.6	RND	Resistance-Nodulation-Cell Division (RND) Superfamily	CHEBI:23380;copper(2+)
CIFBLAND_03751	9.B.157.1.4	1.11e-146	417	gnl|TC-DB|Q8F2L2|9.B.157.1.4 Actin-like ATPase involved in cell morphogenesis OS=Leptospira interrogans serogroup Icterohaemorrhagiae serovar Lai (strain 56601) OX=189518 GN=mreB PE=4 SV=1	NA	NA	NA	NA	NA
CIFBLAND_03762	3.D.1.3.1	8.32e-122	360	gnl|TC-DB|Q56222|3.D.1.3.1 NADH-quinone oxidoreductase chain 1 (EC 1.6.99.5) (NADH dehydrogenase I, chain 1) (NDH-1, chain 1) - Thermus thermophilus.	3.D.1.3	3.D.1	NDH	Iron-Sulfur Protein (ISP) Superfamily	CHEBI:5584;hydron
CIFBLAND_03773	3.D.4.10.1	5.43e-113	325	gnl|TC-DB|Q51664|3.D.4.10.1 Protein NorQ OS=Paracoccus denitrificans (strain Pd 1222) GN=norQ PE=3 SV=2	NA	NA	NA	NA	CHEBI:5584;hydron
CIFBLAND_03817	3.A.1.103.5	3.45e-102	310	gnl|TC-DB|P72884|3.A.1.103.5 ABC transporter OS=Synechocystis sp. (strain PCC 6803 / Kazusa) GN=rfbB PE=4 SV=1	3.A.1.103	3.A.1	ABC	ABC1, ABC2, ABC3 Superfamilies	CHEBI:4879;ethanol|CHEBI:23008;carbohydrate
CIFBLAND_03870	3.A.5.1.3	0	946	gnl|TC-DB|Q6MR29|3.A.5.1.3 Protein translocase subunit SecA OS=Bdellovibrio bacteriovorus (strain ATCC 15356 / DSM 50701 / NCIB 9529 / HD100) GN=secA PE=3 SV=1	3.A.5.1	3.A.5	Sec	Ankyrin Repeat Domain-containing (Ank) Superfamily	CHEBI:8526;protein polypeptide chain
CIFBLAND_03950	3.A.3.5.39	2.32e-297	840	gnl|TC-DB|AMR68964.1|3.A.3.5.39 heavy-metal transporting P-type ATPase [Bradyrhizobium liaoningense]	3.A.3.5	3.A.3	P-ATPase	P-type ATPase (P-ATPase) Superfamily	CHEBI:3290;cadmium(2+)|CHEBI:23379;copper(1+)|CHEBI:27365;zinc ion
CIFBLAND_04133	3.A.3.2.21	1.59e-237	691	gnl|TC-DB|A9BJX0|3.A.3.2.21 Calcium-translocating P-type ATPase, PMCA-type OS=Petrotoga mobilis (strain DSM 10674 / SJ95) GN=Pmob_0991 PE=3 SV=1	3.A.3.2	3.A.3	P-ATPase	P-type ATPase (P-ATPase) Superfamily	CHEBI:3308;calcium(2+)
CIFBLAND_04178	3.A.15.4.1	3.24e-117	360	gnl|TC-DB|Q8F3M7|3.A.15.4.1 Type II secretory pathway ATPase protein E OS=Leptospira interrogans serogroup Icterohaemorrhagiae serovar Lai (strain 56601) GN=gspE PE=4 SV=1	NA	NA	NA	NA	CHEBI:8526;protein polypeptide chain
CIFBLAND_04186	2.A.1.25.2	3.77e-128	378	gnl|TC-DB|P0AE16|2.A.1.25.2 Protein ampG - Escherichia coli.	2.A.1.25	2.A.1	MFS	Major Facilitator (MFS) Superfamily	CHEBI:7990;peptide|CHEBI:24396;glycopeptide

[truncated: 8 more sheets: NTP05, PRO01, PRO02, PRO04, PRO05, PLA01, PLA02, PLA03]
